# Supplementary material for: ERBB family fusions are recurrent and actionable oncogenic targets across cancer types
Source: Front Oncol. 2023 Apr 24;13:1115405. doi: 10.3389/fonc.2023.1115405 (PMC10164992; doi:10.3389/fonc.2023.1115405)
Supplement: Supplementary file 4 [file Table_4.xlsx]

## Sheet: EGFR mutations
Study	Sample ID	Cancer Type	Protein Change	Annotation	Functional Impact	Mutation Type	Variant Type	Copy #	COSMIC	MS	VS	Center	Chromosome	Start Pos	End Pos	Ref	Var	HGVSg	HGVSc	Allele Freq (T)	Allele Freq (N)	Variant Reads	Ref Reads	Variant Reads (Normal)	Ref Reads (Normal)	# Mut in Sample	Exon	gnomAD	ClinVar ID	dbSNP
Lung Adenocarcinoma (TCGA, PanCancer Atlas)	TCGA-78-7147-01	Lung Adenocarcinoma	D1083Efs*11	OncoKB: Unknown, level NA;CIViC: NA;MyCancerGenome: not present;CancerHotspot: no;3DHotspot: no	MutationAssessor: NA;SIFT: NA;Polyphen-2: NA	Frame_Shift_Del	DEL	gain		.	.	.	7	55270296	55270296	C	-	7:g.55270296del	ENST00000275493.2:c.3249del	0.33		9	18		24	306	27/28
Stomach Adenocarcinoma (TCGA, PanCancer Atlas)	TCGA-F1-6874-01	Intestinal Type Stomach Adenocarcinoma	P266Hfs*14	OncoKB: Unknown, level NA;CIViC: NA;MyCancerGenome: not present;CancerHotspot: no;3DHotspot: no	MutationAssessor: NA;SIFT: NA;Polyphen-2: NA	Frame_Shift_Del	DEL	gain		.	.	.	7	55221748	55221748	C	-	7:g.55221748del	ENST00000275493.2:c.797del	0.24		35	109		99	850	2020-07-28
Uterine Corpus Endometrial Carcinoma (TCGA, PanCancer Atlas)	TCGA-B5-A0JU-01	Uterine Endometrioid Carcinoma	P266Hfs*14	OncoKB: Unknown, level NA;CIViC: NA;MyCancerGenome: not present;CancerHotspot: no;3DHotspot: no	MutationAssessor: NA;SIFT: NA;Polyphen-2: NA	Frame_Shift_Del	DEL	diploid		.	.	.	7	55221748	55221748	C	-	7:g.55221748del	ENST00000275493.2:c.797del	0.36		22	39		32	407	2020-07-28
Ovarian Serous Cystadenocarcinoma (TCGA, PanCancer Atlas)	TCGA-13-0889-01	Serous Ovarian Cancer	T1074Nfs*6	OncoKB: Unknown, level NA;CIViC: NA;MyCancerGenome: not present;CancerHotspot: no;3DHotspot: no	MutationAssessor: NA;SIFT: NA;Polyphen-2: NA	Frame_Shift_Ins	INS	diploid		.	.	.	7	55270266	55270267	-	A	7:g.55270266_55270267insA	ENST00000275493.2:c.3220dup	0.12		8	60		240	1066	27/28
Glioblastoma Multiforme (TCGA, PanCancer Atlas)	TCGA-02-2485-01	Glioblastoma Multiforme	EGFR-SEPT14	OncoKB: Oncogenic, level NA;CIViC: NA;MyCancerGenome: not present;CancerHotspot: no;3DHotspot: no	MutationAssessor: NA;SIFT: NA;Polyphen-2: NA	Fusion	NA	amp		NA	NA	WashU	NA	-1	-1	NA										55
Glioblastoma Multiforme (TCGA, PanCancer Atlas)	TCGA-06-A6S1-01	Glioblastoma Multiforme	EGFR-SEPT14	OncoKB: Oncogenic, level NA;CIViC: NA;MyCancerGenome: not present;CancerHotspot: no;3DHotspot: no	MutationAssessor: NA;SIFT: NA;Polyphen-2: NA	Fusion	NA	gain		NA	NA	WashU	NA	-1	-1	NA										45
Glioblastoma Multiforme (TCGA, PanCancer Atlas)	TCGA-14-1825-01	Glioblastoma Multiforme	EGFR-SEPT14	OncoKB: Oncogenic, level NA;CIViC: NA;MyCancerGenome: not present;CancerHotspot: no;3DHotspot: no	MutationAssessor: NA;SIFT: NA;Polyphen-2: NA	Fusion	NA	gain		NA	NA	WashU	NA	-1	-1	NA										46
Glioblastoma Multiforme (TCGA, PanCancer Atlas)	TCGA-27-1837-01	Glioblastoma Multiforme	EGFR-SEPT14	OncoKB: Oncogenic, level NA;CIViC: NA;MyCancerGenome: not present;CancerHotspot: no;3DHotspot: no	MutationAssessor: NA;SIFT: NA;Polyphen-2: NA	Fusion	NA	amp		NA	NA	WashU	NA	-1	-1	NA										35
Glioblastoma Multiforme (TCGA, PanCancer Atlas)	TCGA-28-1747-01	Glioblastoma Multiforme	EGFR-SEPT14	OncoKB: Oncogenic, level NA;CIViC: NA;MyCancerGenome: not present;CancerHotspot: no;3DHotspot: no	MutationAssessor: NA;SIFT: NA;Polyphen-2: NA	Fusion	NA	amp		NA	NA	WashU	NA	-1	-1	NA										43
Glioblastoma Multiforme (TCGA, PanCancer Atlas)	TCGA-28-2513-01	Glioblastoma Multiforme	EGFR-SEPT14	OncoKB: Oncogenic, level NA;CIViC: NA;MyCancerGenome: not present;CancerHotspot: no;3DHotspot: no	MutationAssessor: NA;SIFT: NA;Polyphen-2: NA	Fusion	NA	amp		NA	NA	WashU	NA	-1	-1	NA										77
Glioblastoma Multiforme (TCGA, PanCancer Atlas)	TCGA-32-5222-01	Glioblastoma Multiforme	EGFR-SEPT14	OncoKB: Oncogenic, level NA;CIViC: NA;MyCancerGenome: not present;CancerHotspot: no;3DHotspot: no	MutationAssessor: NA;SIFT: NA;Polyphen-2: NA	Fusion	NA	amp		NA	NA	WashU	NA	-1	-1	NA										62
Glioblastoma Multiforme (TCGA, PanCancer Atlas)	TCGA-06-0211-01	Glioblastoma Multiforme	EGFR-SEPT14	OncoKB: Oncogenic, level NA;CIViC: NA;MyCancerGenome: not present;CancerHotspot: no;3DHotspot: no	MutationAssessor: NA;SIFT: NA;Polyphen-2: NA	Fusion	NA	amp		NA	NA	WashU	NA	-1	-1	NA										55
Glioblastoma Multiforme (TCGA, PanCancer Atlas)	TCGA-06-0750-01	Glioblastoma Multiforme	EGFR-SEPT14	OncoKB: Oncogenic, level NA;CIViC: NA;MyCancerGenome: not present;CancerHotspot: no;3DHotspot: no	MutationAssessor: NA;SIFT: NA;Polyphen-2: NA	Fusion	NA	amp		NA	NA	WashU	NA	-1	-1	NA										33
Head and Neck Squamous Cell Carcinoma (TCGA, PanCancer Atlas)	TCGA-CR-7368-01	Head and Neck Squamous Cell Carcinoma	EGFR-SEPT14	OncoKB: Oncogenic, level NA;CIViC: NA;MyCancerGenome: not present;CancerHotspot: no;3DHotspot: no	MutationAssessor: NA;SIFT: NA;Polyphen-2: NA	Fusion	NA	diploid		NA	NA	WashU	NA	-1	-1	NA										190
Brain Lower Grade Glioma (TCGA, PanCancer Atlas)	TCGA-DU-5852-01	Oligoastrocytoma	EGFR-SEPT14	OncoKB: Oncogenic, level NA;CIViC: NA;MyCancerGenome: not present;CancerHotspot: no;3DHotspot: no	MutationAssessor: NA;SIFT: NA;Polyphen-2: NA	Fusion	NA	amp		NA	NA	WashU	NA	-1	-1	NA										65
Brain Lower Grade Glioma (TCGA, PanCancer Atlas)	TCGA-DU-6406-01	Oligoastrocytoma	EGFR-SEPT14	OncoKB: Oncogenic, level NA;CIViC: NA;MyCancerGenome: not present;CancerHotspot: no;3DHotspot: no	MutationAssessor: NA;SIFT: NA;Polyphen-2: NA	Fusion	NA	amp		NA	NA	WashU	NA	-1	-1	NA										5
Brain Lower Grade Glioma (TCGA, PanCancer Atlas)	TCGA-DU-6407-01	Oligodendroglioma	EGFR-SEPT14	OncoKB: Oncogenic, level NA;CIViC: NA;MyCancerGenome: not present;CancerHotspot: no;3DHotspot: no	MutationAssessor: NA;SIFT: NA;Polyphen-2: NA	Fusion	NA	gain		NA	NA	WashU	NA	-1	-1	NA										21
Bladder Urothelial Carcinoma (TCGA, PanCancer Atlas)	TCGA-FD-A3B7-01	Bladder Urothelial Carcinoma	EGFR-GYG1	OncoKB: Unknown, level NA;CIViC: NA;MyCancerGenome: not present;CancerHotspot: no;3DHotspot: no	MutationAssessor: NA;SIFT: NA;Polyphen-2: NA	Fusion	NA	amp		NA	NA	WashU	NA	-1	-1	NA										66
Bladder Urothelial Carcinoma (TCGA, PanCancer Atlas)	TCGA-GC-A6I3-01	Bladder Urothelial Carcinoma	EGFR-GRB10	OncoKB: Unknown, level NA;CIViC: NA;MyCancerGenome: not present;CancerHotspot: no;3DHotspot: no	MutationAssessor: NA;SIFT: NA;Polyphen-2: NA	Fusion	NA	amp		NA	NA	WashU	NA	-1	-1	NA										205
Bladder Urothelial Carcinoma (TCGA, PanCancer Atlas)	TCGA-GU-A766-01	Bladder Urothelial Carcinoma	RHBDD2-EGFR	OncoKB: Unknown, level NA;CIViC: NA;MyCancerGenome: not present;CancerHotspot: no;3DHotspot: no	MutationAssessor: NA;SIFT: NA;Polyphen-2: NA	Fusion	NA	gain		NA	NA	WashU	NA	-1	-1	NA										168
Glioblastoma Multiforme (TCGA, PanCancer Atlas)	TCGA-19-A60I-01	Glioblastoma Multiforme	EGFR-TEAD3	OncoKB: Unknown, level NA;CIViC: NA;MyCancerGenome: not present;CancerHotspot: no;3DHotspot: no	MutationAssessor: NA;SIFT: NA;Polyphen-2: NA	Fusion	NA	amp		NA	NA	WashU	NA	-1	-1	NA										28
Glioblastoma Multiforme (TCGA, PanCancer Atlas)	TCGA-32-5222-01	Glioblastoma Multiforme	EGFR-SEPT14P24	OncoKB: Unknown, level NA;CIViC: NA;MyCancerGenome: not present;CancerHotspot: no;3DHotspot: no	MutationAssessor: NA;SIFT: NA;Polyphen-2: NA	Fusion	NA	amp		NA	NA	WashU	NA	-1	-1	NA										62
Glioblastoma Multiforme (TCGA, PanCancer Atlas)	TCGA-06-2565-01	Glioblastoma Multiforme	SEC61G-EGFR	OncoKB: Unknown, level NA;CIViC: NA;MyCancerGenome: not present;CancerHotspot: no;3DHotspot: no	MutationAssessor: NA;SIFT: NA;Polyphen-2: NA	Fusion	NA	amp		NA	NA	WashU	NA	-1	-1	NA										44
Glioblastoma Multiforme (TCGA, PanCancer Atlas)	TCGA-06-0211-01	Glioblastoma Multiforme	SEC61G-EGFR	OncoKB: Unknown, level NA;CIViC: NA;MyCancerGenome: not present;CancerHotspot: no;3DHotspot: no	MutationAssessor: NA;SIFT: NA;Polyphen-2: NA	Fusion	NA	amp		NA	NA	WashU	NA	-1	-1	NA										55
Head and Neck Squamous Cell Carcinoma (TCGA, PanCancer Atlas)	TCGA-BA-6872-01	Head and Neck Squamous Cell Carcinoma	EGFR-DYM	OncoKB: Unknown, level NA;CIViC: NA;MyCancerGenome: not present;CancerHotspot: no;3DHotspot: no	MutationAssessor: NA;SIFT: NA;Polyphen-2: NA	Fusion	NA	amp		NA	NA	WashU	NA	-1	-1	NA										159
Head and Neck Squamous Cell Carcinoma (TCGA, PanCancer Atlas)	TCGA-CV-6941-01	Head and Neck Squamous Cell Carcinoma	EGFR-ACADM	OncoKB: Unknown, level NA;CIViC: NA;MyCancerGenome: not present;CancerHotspot: no;3DHotspot: no	MutationAssessor: NA;SIFT: NA;Polyphen-2: NA	Fusion	NA	amp		NA	NA	WashU	NA	-1	-1	NA										147
Brain Lower Grade Glioma (TCGA, PanCancer Atlas)	TCGA-E1-A7YJ-01	Astrocytoma	EGFR-C7orf72	OncoKB: Unknown, level NA;CIViC: NA;MyCancerGenome: not present;CancerHotspot: no;3DHotspot: no	MutationAssessor: NA;SIFT: NA;Polyphen-2: NA	Fusion	NA	amp		NA	NA	WashU	NA	-1	-1	NA										33
Brain Lower Grade Glioma (TCGA, PanCancer Atlas)	TCGA-S9-A6WM-01	Astrocytoma	EGFR-VSTM2A	OncoKB: Unknown, level NA;CIViC: NA;MyCancerGenome: not present;CancerHotspot: no;3DHotspot: no	MutationAssessor: NA;SIFT: NA;Polyphen-2: NA	Fusion	NA	amp		NA	NA	WashU	NA	-1	-1	NA										56
Liver Hepatocellular Carcinoma (TCGA, PanCancer Atlas)	TCGA-2Y-A9H0-01	Hepatocellular Carcinoma	EGFR-LYST	OncoKB: Unknown, level NA;CIViC: NA;MyCancerGenome: not present;CancerHotspot: no;3DHotspot: no	MutationAssessor: NA;SIFT: NA;Polyphen-2: NA	Fusion	NA	gain		NA	NA	WashU	NA	-1	-1	NA										73
Lung Squamous Cell Carcinoma (TCGA, PanCancer Atlas)	TCGA-O2-A52N-01	Lung Squamous Cell Carcinoma	EGFR-CHODL	OncoKB: Unknown, level NA;CIViC: NA;MyCancerGenome: not present;CancerHotspot: no;3DHotspot: no	MutationAssessor: NA;SIFT: NA;Polyphen-2: NA	Fusion	NA	amp		NA	NA	WashU	NA	-1	-1	NA										451
Lung Squamous Cell Carcinoma (TCGA, PanCancer Atlas)	TCGA-70-6723-01	Lung Squamous Cell Carcinoma	TCEA1-EGFR	OncoKB: Unknown, level NA;CIViC: NA;MyCancerGenome: not present;CancerHotspot: no;3DHotspot: no	MutationAssessor: NA;SIFT: NA;Polyphen-2: NA	Fusion	NA	amp		NA	NA	WashU	NA	-1	-1	NA										105
Stomach Adenocarcinoma (TCGA, PanCancer Atlas)	TCGA-BR-6706-01	Stomach Adenocarcinoma	EGFR-INSL4	OncoKB: Unknown, level NA;CIViC: NA;MyCancerGenome: not present;CancerHotspot: no;3DHotspot: no	MutationAssessor: NA;SIFT: NA;Polyphen-2: NA	Fusion	NA	amp		NA	NA	WashU	NA	-1	-1	NA										190
Stomach Adenocarcinoma (TCGA, PanCancer Atlas)	TCGA-BR-6706-01	Stomach Adenocarcinoma	EGFR-RCL1	OncoKB: Unknown, level NA;CIViC: NA;MyCancerGenome: not present;CancerHotspot: no;3DHotspot: no	MutationAssessor: NA;SIFT: NA;Polyphen-2: NA	Fusion	NA	amp		NA	NA	WashU	NA	-1	-1	NA										190
Stomach Adenocarcinoma (TCGA, PanCancer Atlas)	TCGA-RD-A8N1-01	Diffuse Type Stomach Adenocarcinoma	RAC1P2-EGFR	OncoKB: Unknown, level NA;CIViC: NA;MyCancerGenome: not present;CancerHotspot: no;3DHotspot: no	MutationAssessor: NA;SIFT: NA;Polyphen-2: NA	Fusion	NA	gain		NA	NA	WashU	NA	-1	-1	NA										99
Lung Adenocarcinoma (TCGA, PanCancer Atlas)	TCGA-49-4501-01	Lung Adenocarcinoma	E746_A750del	OncoKB: Oncogenic, level_1;CIViC: Predictive: 2;MyCancerGenome: not present;CancerHotspot: yes;3DHotspot: no	MutationAssessor: NA;SIFT: NA;Polyphen-2: NA	In_Frame_Del	DEL	amp		.	.	.	7	55242466	55242480	GAATTAAGAGAAGCA	-	7:g.55242466_55242480del	ENST00000275493.2:c.2236_2250del	0.27		37	98		55	47	19/28
Lung Adenocarcinoma (TCGA, PanCancer Atlas)	TCGA-55-8206-01	Lung Adenocarcinoma	E746_A750del	OncoKB: Oncogenic, level_1;CIViC: Predictive: 2;MyCancerGenome: not present;CancerHotspot: yes;3DHotspot: no	MutationAssessor: NA;SIFT: NA;Polyphen-2: NA	In_Frame_Del	DEL	gain		.	.	.	7	55242466	55242480	GAATTAAGAGAAGCA	-	7:g.55242466_55242480del	ENST00000275493.2:c.2236_2250del	0.22		13	47		92	27	19/28
Lung Adenocarcinoma (TCGA, PanCancer Atlas)	TCGA-62-A46U-01	Lung Adenocarcinoma	E746_A750del	OncoKB: Oncogenic, level_1;CIViC: Predictive: 2;MyCancerGenome: not present;CancerHotspot: yes;3DHotspot: no	MutationAssessor: NA;SIFT: NA;Polyphen-2: NA	In_Frame_Del	DEL	diploid		.	.	.	7	55242466	55242480	GAATTAAGAGAAGCA	-	7:g.55242466_55242480del	ENST00000275493.2:c.2236_2250del	0.12		9	69		57	40	19/28
Lung Adenocarcinoma (TCGA, PanCancer Atlas)	TCGA-97-8552-01	Lung Adenocarcinoma	E746_A750del	OncoKB: Oncogenic, level_1;CIViC: Predictive: 2;MyCancerGenome: not present;CancerHotspot: yes;3DHotspot: no	MutationAssessor: NA;SIFT: NA;Polyphen-2: NA	In_Frame_Del	DEL	gain		.	.	.	7	55242466	55242480	GAATTAAGAGAAGCA	-	7:g.55242466_55242480del	ENST00000275493.2:c.2236_2250del	0.2		17	67		89	23	19/28
Lung Adenocarcinoma (TCGA, PanCancer Atlas)	TCGA-J2-8192-01	Lung Adenocarcinoma	E746_A750del	OncoKB: Oncogenic, level_1;CIViC: Predictive: 2;MyCancerGenome: not present;CancerHotspot: yes;3DHotspot: no	MutationAssessor: NA;SIFT: NA;Polyphen-2: NA	In_Frame_Del	DEL	gain		.	.	.	7	55242466	55242480	GAATTAAGAGAAGCA	-	7:g.55242466_55242480del	ENST00000275493.2:c.2236_2250del	0.34		41	80		98	67	19/28
Lung Adenocarcinoma (TCGA, PanCancer Atlas)	TCGA-38-4628-01	Lung Adenocarcinoma	E746_A750del	OncoKB: Oncogenic, level_1;CIViC: Predictive: 2;MyCancerGenome: not present;CancerHotspot: yes;3DHotspot: no	MutationAssessor: NA;SIFT: NA;Polyphen-2: NA	In_Frame_Del	DEL	gain		.	.	.	7	55242465	55242479	GGAATTAAGAGAAGC	-	7:g.55242465_55242479del	ENST00000275493.2:c.2235_2249del	0.37		34	59		87	112	19/28
Lung Adenocarcinoma (TCGA, PanCancer Atlas)	TCGA-38-6178-01	Lung Adenocarcinoma	E746_A750del	OncoKB: Oncogenic, level_1;CIViC: Predictive: 2;MyCancerGenome: not present;CancerHotspot: yes;3DHotspot: no	MutationAssessor: NA;SIFT: NA;Polyphen-2: NA	In_Frame_Del	DEL	amp		.	.	.	7	55242465	55242479	GGAATTAAGAGAAGC	-	7:g.55242465_55242479del	ENST00000275493.2:c.2235_2249del	0.55		87	70		108	65	19/28
Lung Adenocarcinoma (TCGA, PanCancer Atlas)	TCGA-62-8402-01	Lung Adenocarcinoma	E746_A750del	OncoKB: Oncogenic, level_1;CIViC: Predictive: 2;MyCancerGenome: not present;CancerHotspot: yes;3DHotspot: no	MutationAssessor: NA;SIFT: NA;Polyphen-2: NA	In_Frame_Del	DEL	shallowdel		.	.	.	7	55242465	55242479	GGAATTAAGAGAAGC	-	7:g.55242465_55242479del	ENST00000275493.2:c.2235_2249del	0.39		24	37		92	41	19/28
Lung Adenocarcinoma (TCGA, PanCancer Atlas)	TCGA-75-6207-01	Lung Adenocarcinoma	E746_A750del	OncoKB: Oncogenic, level_1;CIViC: Predictive: 2;MyCancerGenome: not present;CancerHotspot: yes;3DHotspot: no	MutationAssessor: NA;SIFT: NA;Polyphen-2: NA	In_Frame_Del	DEL	gain		.	.	.	7	55242465	55242479	GGAATTAAGAGAAGC	-	7:g.55242465_55242479del	ENST00000275493.2:c.2235_2249del	0.25		15	44		104	60	19/28
Lung Adenocarcinoma (TCGA, PanCancer Atlas)	TCGA-75-7025-01	Lung Adenocarcinoma	E746_A750del	OncoKB: Oncogenic, level_1;CIViC: Predictive: 2;MyCancerGenome: not present;CancerHotspot: yes;3DHotspot: no	MutationAssessor: NA;SIFT: NA;Polyphen-2: NA	In_Frame_Del	DEL	gain		.	.	.	7	55242465	55242479	GGAATTAAGAGAAGC	-	7:g.55242465_55242479del	ENST00000275493.2:c.2235_2249del	0.35		27	51		81	31	19/28
Lung Adenocarcinoma (TCGA, PanCancer Atlas)	TCGA-86-8074-01	Lung Adenocarcinoma	E746_A750del	OncoKB: Oncogenic, level_1;CIViC: Predictive: 2;MyCancerGenome: not present;CancerHotspot: yes;3DHotspot: no	MutationAssessor: NA;SIFT: NA;Polyphen-2: NA	In_Frame_Del	DEL	amp		.	.	.	7	55242465	55242479	GGAATTAAGAGAAGC	-	7:g.55242465_55242479del	ENST00000275493.2:c.2235_2249del	0.11		11	92		103	63	19/28
Lung Adenocarcinoma (TCGA, PanCancer Atlas)	TCGA-86-8280-01	Lung Adenocarcinoma	E746_A750del	OncoKB: Oncogenic, level_1;CIViC: Predictive: 2;MyCancerGenome: not present;CancerHotspot: yes;3DHotspot: no	MutationAssessor: NA;SIFT: NA;Polyphen-2: NA	In_Frame_Del	DEL	gain		.	.	.	7	55242465	55242479	GGAATTAAGAGAAGC	-	7:g.55242465_55242479del	ENST00000275493.2:c.2235_2249del	0.26		27	76		87	43	19/28
Lung Adenocarcinoma (TCGA, PanCancer Atlas)	TCGA-97-8171-01	Lung Adenocarcinoma	E746_A750del	OncoKB: Oncogenic, level_1;CIViC: Predictive: 2;MyCancerGenome: not present;CancerHotspot: yes;3DHotspot: no	MutationAssessor: NA;SIFT: NA;Polyphen-2: NA	In_Frame_Del	DEL	gain		.	.	.	7	55242465	55242479	GGAATTAAGAGAAGC	-	7:g.55242465_55242479del	ENST00000275493.2:c.2235_2249del	0.54		43	37		94	54	19/28
Lung Adenocarcinoma (TCGA, PanCancer Atlas)	TCGA-97-8547-01	Lung Adenocarcinoma	E746_A750del	OncoKB: Oncogenic, level_1;CIViC: Predictive: 2;MyCancerGenome: not present;CancerHotspot: yes;3DHotspot: no	MutationAssessor: NA;SIFT: NA;Polyphen-2: NA	In_Frame_Del	DEL	gain		.	.	.	7	55242465	55242479	GGAATTAAGAGAAGC	-	7:g.55242465_55242479del	ENST00000275493.2:c.2235_2249del	0.37		47	81		74	53	19/28
Lung Adenocarcinoma (TCGA, PanCancer Atlas)	TCGA-97-A4M6-01	Lung Adenocarcinoma	E746_A750del	OncoKB: Oncogenic, level_1;CIViC: Predictive: 2;MyCancerGenome: not present;CancerHotspot: yes;3DHotspot: no	MutationAssessor: NA;SIFT: NA;Polyphen-2: NA	In_Frame_Del	DEL	diploid		.	.	.	7	55242465	55242479	GGAATTAAGAGAAGC	-	7:g.55242465_55242479del	ENST00000275493.2:c.2235_2249del	0.15		11	64		73	28	19/28
Lung Adenocarcinoma (TCGA, PanCancer Atlas)	TCGA-17-Z032-01	Lung Adenocarcinoma	E746_A750del	OncoKB: Oncogenic, level_1;CIViC: Predictive: 2;MyCancerGenome: not present;CancerHotspot: yes;3DHotspot: no	MutationAssessor: NA;SIFT: NA;Polyphen-2: NA	In_Frame_Del	DEL			.	.	.	7	55242465	55242479	GGAATTAAGAGAAGC	-	7:g.55242465_55242479del	ENST00000275493.2:c.2235_2249del	0.29		19	46		108	104	19/28
Lung Adenocarcinoma (TCGA, PanCancer Atlas)	TCGA-55-7573-01	Lung Adenocarcinoma	L747_E749del	OncoKB: Oncogenic, level_1;CIViC: NA;MyCancerGenome: not present;CancerHotspot: yes;3DHotspot: no	MutationAssessor: NA;SIFT: NA;Polyphen-2: NA	In_Frame_Del	DEL	diploid		.	.	.	7	55242466	55242474	GAATTAAGA	-	7:g.55242466_55242474del	ENST00000275493.2:c.2239_2247del	0.19		11	46		72	50	19/28		177765
Lung Adenocarcinoma (TCGA, PanCancer Atlas)	TCGA-55-6980-01	Lung Adenocarcinoma	E709_T710delinsD	OncoKB: Oncogenic, level_3a;CIViC: NA;MyCancerGenome: not present;CancerHotspot: yes;3DHotspot: no	MutationAssessor: NA;SIFT: NA;Polyphen-2: NA	In_Frame_Del	DEL	gain		.	.	.	7	55241679	55241681	AAC	-	7:g.55241679_55241681del	ENST00000275493.2:c.2127_2129del	0.26		19	53		65	30	18/28		45220	rs397517086
Lung Adenocarcinoma (TCGA, PanCancer Atlas)	TCGA-69-7760-01	Lung Adenocarcinoma	E709_T710delinsD	OncoKB: Oncogenic, level_3a;CIViC: NA;MyCancerGenome: not present;CancerHotspot: yes;3DHotspot: no	MutationAssessor: NA;SIFT: NA;Polyphen-2: NA	In_Frame_Del	DEL	amp		.	.	.	7	55241679	55241681	AAC	-	7:g.55241679_55241681del	ENST00000275493.2:c.2127_2129del	0.51		77	73		57	63	18/28		45220	rs397517086
Lung Adenocarcinoma (TCGA, PanCancer Atlas)	TCGA-86-A4P7-01	Lung Adenocarcinoma	E709_T710delinsD	OncoKB: Oncogenic, level_3a;CIViC: NA;MyCancerGenome: not present;CancerHotspot: yes;3DHotspot: no	MutationAssessor: NA;SIFT: NA;Polyphen-2: NA	In_Frame_Del	DEL	gain		.	.	.	7	55241679	55241681	AAC	-	7:g.55241679_55241681del	ENST00000275493.2:c.2127_2129del	0.12		11	80		101	66	18/28		45220	rs397517086
Lung Adenocarcinoma (TCGA, PanCancer Atlas)	TCGA-55-6981-01	Lung Adenocarcinoma	L747_T751del	OncoKB: Oncogenic, level_1;CIViC: NA;MyCancerGenome: not present;CancerHotspot: yes;3DHotspot: no	MutationAssessor: NA;SIFT: NA;Polyphen-2: NA	In_Frame_Del	DEL	amp		.	.	.	7	55242468	55242482	ATTAAGAGAAGCAAC	-	7:g.55242468_55242482del	ENST00000275493.2:c.2240_2254del	0.6		100	68		144	203	19/28
Lung Adenocarcinoma (TCGA, PanCancer Atlas)	TCGA-55-A57B-01	Lung Adenocarcinoma	L747_T751del	OncoKB: Oncogenic, level_1;CIViC: NA;MyCancerGenome: not present;CancerHotspot: yes;3DHotspot: no	MutationAssessor: NA;SIFT: NA;Polyphen-2: NA	In_Frame_Del	DEL	gain		.	.	.	7	55242468	55242482	ATTAAGAGAAGCAAC	-	7:g.55242468_55242482del	ENST00000275493.2:c.2240_2254del	0.16		15	77		55	39	19/28
Lung Adenocarcinoma (TCGA, PanCancer Atlas)	TCGA-50-6591-01	Lung Adenocarcinoma	K754_I759del	OncoKB: Oncogenic, level_1;CIViC: NA;MyCancerGenome: not present;CancerHotspot: yes;3DHotspot: no	MutationAssessor: NA;SIFT: NA;Polyphen-2: NA	In_Frame_Del	DEL	amp		.	.	.	7	55242490	55242507	AAAGCCAACAAGGAAATC	-	7:g.55242490_55242507del	ENST00000275493.2:c.2260_2277del	0.8		167	43		54	55	19/28
Lung Adenocarcinoma (TCGA, PanCancer Atlas)	TCGA-05-4402-01	Lung Adenocarcinoma	T751_I759delinsN	OncoKB: Oncogenic, level_1;CIViC: NA;MyCancerGenome: not present;CancerHotspot: yes;3DHotspot: no	MutationAssessor: NA;SIFT: NA;Polyphen-2: NA	In_Frame_Del	DEL	amp		.	.	.	7	55242482	55242506	CATCTCCGAAAGCCAACAAGGAAAT	A	7:g.55242482_55242506delinsA	ENST00000275493.2:c.2252_2276delinsA	0.36		47	82		56	121	19/28
Lung Adenocarcinoma (TCGA, PanCancer Atlas)	TCGA-75-6212-01	Lung Adenocarcinoma	L747_A750delinsP	OncoKB: Oncogenic, level_1;CIViC: NA;MyCancerGenome: not present;CancerHotspot: yes;3DHotspot: no	MutationAssessor: NA;SIFT: NA;Polyphen-2: NA	In_Frame_Del	DEL	diploid		.	.	.	7	55242469	55242478	TTAAGAGAAG	C	7:g.55242469_55242478delinsC	ENST00000275493.2:c.2239_2248delinsC	0.31		24	54		82	20	19/28		177684	rs727504278
Lung Adenocarcinoma (TCGA, PanCancer Atlas)	TCGA-MP-A4T6-01	Lung Adenocarcinoma	L747_A750delinsP	OncoKB: Oncogenic, level_1;CIViC: NA;MyCancerGenome: not present;CancerHotspot: yes;3DHotspot: no	MutationAssessor: NA;SIFT: NA;Polyphen-2: NA	In_Frame_Del	DEL	gain		.	.	.	7	55242469	55242478	TTAAGAGAAG	C	7:g.55242469_55242478delinsC	ENST00000275493.2:c.2239_2248delinsC	0.28		29	75		67	58	19/28		177684	rs727504278
Lung Squamous Cell Carcinoma (TCGA, PanCancer Atlas)	TCGA-85-A50M-01	Lung Squamous Cell Carcinoma	E746_A750del	OncoKB: Oncogenic, level_1;CIViC: Predictive: 2;MyCancerGenome: not present;CancerHotspot: yes;3DHotspot: no	MutationAssessor: NA;SIFT: NA;Polyphen-2: NA	In_Frame_Del	DEL	gain		.	.	.	7	55242465	55242479	GGAATTAAGAGAAGC	-	7:g.55242465_55242479del	ENST00000275493.2:c.2235_2249del	0.44		21	27		75	71	19/28
Glioblastoma Multiforme (TCGA, PanCancer Atlas)	TCGA-06-6695-01	Glioblastoma Multiforme	H773_V774dup	OncoKB: Oncogenic, level_3b;CIViC: NA;MyCancerGenome: not present;CancerHotspot: yes;3DHotspot: no	MutationAssessor: NA;SIFT: NA;Polyphen-2: NA	In_Frame_Ins	INS	gain		.	.	.	7	55249017	55249018	-	CCACGT	7:g.55249017_55249018insCCACGT	ENST00000275493.2:c.2316_2321dup	0.18		24	108		138	55	20/28
Liver Hepatocellular Carcinoma (TCGA, PanCancer Atlas)	TCGA-DD-AACI-01	Hepatocellular Carcinoma	A767_V769dup	OncoKB: Oncogenic, level_3b;CIViC: NA;MyCancerGenome: not present;CancerHotspot: yes;3DHotspot: no	MutationAssessor: NA;SIFT: NA;Polyphen-2: NA	In_Frame_Ins	INS	gain		.	.	.	7	55248998	55248999	-	TGGCCAGCG	7:g.55248998_55248999insTGGCCAGCG	ENST00000275493.2:c.2300_2308dup	0.13		19	122		103	334	20/28
Liver Hepatocellular Carcinoma (TCGA, PanCancer Atlas)	TCGA-DD-AACY-01	Hepatocellular Carcinoma	A767_V769dup	OncoKB: Oncogenic, level_3b;CIViC: NA;MyCancerGenome: not present;CancerHotspot: yes;3DHotspot: no	MutationAssessor: NA;SIFT: NA;Polyphen-2: NA	In_Frame_Ins	INS	diploid		.	.	.	7	55248998	55248999	-	TGGCCAGCG	7:g.55248998_55248999insTGGCCAGCG	ENST00000275493.2:c.2300_2308dup	0.18		14	63		101	81	20/28
Lung Adenocarcinoma (TCGA, PanCancer Atlas)	TCGA-44-5645-01	Lung Adenocarcinoma	A767_V769dup	OncoKB: Oncogenic, level_3a;CIViC: NA;MyCancerGenome: not present;CancerHotspot: yes;3DHotspot: no	MutationAssessor: NA;SIFT: NA;Polyphen-2: NA	In_Frame_Ins	INS	gain		.	.	.	7	55248998	55248999	-	TGGCCAGCG	7:g.55248998_55248999insTGGCCAGCG	ENST00000275493.2:c.2300_2308dup	0.25		44	132		187	36	20/28
Lung Adenocarcinoma (TCGA, PanCancer Atlas)	TCGA-50-6673-01	Lung Adenocarcinoma	H773dup	OncoKB: Oncogenic, level_3a;CIViC: NA;MyCancerGenome: not present;CancerHotspot: yes;3DHotspot: no	MutationAssessor: NA;SIFT: NA;Polyphen-2: NA	In_Frame_Ins	INS	amp		.	.	.	7	55249017	55249018	-	CCA	7:g.55249017_55249018insCCA	ENST00000275493.2:c.2317_2319dup	0.49		133	140		131	84	20/28
Lung Adenocarcinoma (TCGA, PanCancer Atlas)	TCGA-17-Z048-01	Lung Adenocarcinoma	D770_N771insGL	OncoKB: Oncogenic, level_3a;CIViC: Predictive: 1;MyCancerGenome: not present;CancerHotspot: yes;3DHotspot: no	MutationAssessor: NA;SIFT: NA;Polyphen-2: NA	In_Frame_Ins	INS			.	.	.	7	55249012	55249013	-	GGGTTA	7:g.55249012_55249013insGGGTTA	ENST00000275493.2:c.2310_2311insGGGTTA	0.57		104	79		93	35	20/28
Bladder Urothelial Carcinoma (TCGA, PanCancer Atlas)	TCGA-K4-A3WU-01	Bladder Urothelial Carcinoma	R836H	OncoKB: Predicted Oncogenic, level NA;CIViC: NA;MyCancerGenome: not present;CancerHotspot: no;3DHotspot: yes	MutationAssessor: impact: high, score: 3.815;SIFT: impact: deleterious, score: 0;Polyphen-2: impact: probably_damaging, score: 0.999	Missense_Mutation	SNP	diploid	8	.	.	.	7	55259449	55259449	G	A	7:g.55259449G>A	ENST00000275493.2:c.2507G>A	0.08		10	118		93	178	21/28	1.19439e-05		rs146121458
Breast Invasive Carcinoma (TCGA, PanCancer Atlas)	TCGA-GM-A2DD-01	Breast Invasive Ductal Carcinoma	S768I	OncoKB: Oncogenic, level_3b;CIViC: Predictive: 10;MyCancerGenome: not present;CancerHotspot: yes;3DHotspot: no	MutationAssessor: impact: low, score: 1.885;SIFT: impact: deleterious, score: 0;Polyphen-2: impact: probably_damaging, score: 0.999	Missense_Mutation	SNP	gain	40	.	.	.	7	55249005	55249005	G	T	7:g.55249005G>T	ENST00000275493.2:c.2303G>T	0.27		4	11		26	51	20/28		45251	rs121913465
Breast Invasive Carcinoma (TCGA, PanCancer Atlas)	TCGA-D8-A1JF-01	Breast Invasive Ductal Carcinoma	E114K	OncoKB: Likely Oncogenic, level NA;CIViC: NA;MyCancerGenome: not present;CancerHotspot: no;3DHotspot: no	MutationAssessor: impact: medium, score: 2.2;SIFT: impact: deleterious, score: 0.04;Polyphen-2: impact: benign, score: 0.012	Missense_Mutation	SNP	gain	4	.	.	.	7	55211097	55211097	G	A	7:g.55211097G>A	ENST00000275493.2:c.340G>A	0.51		25	24		50	41	2020-03-28			rs1219568637
Breast Invasive Carcinoma (TCGA, PanCancer Atlas)	TCGA-OL-A97C-01	Breast Invasive Carcinoma (NOS)	A289V	OncoKB: Oncogenic, level NA;CIViC: Predictive: 1;MyCancerGenome: not present;CancerHotspot: yes;3DHotspot: yes	MutationAssessor: impact: medium, score: 3.32;SIFT: impact: deleterious, score: 0.02;Polyphen-2: impact: probably_damaging, score: 0.985	Missense_Mutation	SNP	gain	50	.	.	.	7	55221822	55221822	C	T	7:g.55221822C>T	ENST00000275493.2:c.866C>T	0.48		33	36		49	60	2020-07-28		376209	rs149840192
Cervical Squamous Cell Carcinoma (TCGA, PanCancer Atlas)	TCGA-EA-A410-01	Cervical Squamous Cell Carcinoma	V292M	OncoKB: Likely Oncogenic, level NA;CIViC: NA;MyCancerGenome: not present;CancerHotspot: no;3DHotspot: no	MutationAssessor: impact: medium, score: 2.855;SIFT: impact: deleterious, score: 0;Polyphen-2: impact: probably_damaging, score: 0.994	Missense_Mutation	SNP	diploid	1	.	.	.	7	55221830	55221830	G	A	7:g.55221830G>A	ENST00000275493.2:c.874G>A	0.37		22	38		49	1466	2020-07-28	7.95399e-06		rs150549265
Colorectal Adenocarcinoma (TCGA, PanCancer Atlas)	TCGA-AG-A002-01	Rectal Adenocarcinoma	E114K	OncoKB: Likely Oncogenic, level NA;CIViC: NA;MyCancerGenome: not present;CancerHotspot: no;3DHotspot: no	MutationAssessor: impact: medium, score: 2.2;SIFT: impact: deleterious, score: 0.04;Polyphen-2: impact: benign, score: 0.012	Missense_Mutation	SNP	diploid	4	.	.	.	7	55211097	55211097	G	A	7:g.55211097G>A	ENST00000275493.2:c.340G>A	0.41		38	54		101	11431	2020-03-28			rs1219568637
Colorectal Adenocarcinoma (TCGA, PanCancer Atlas)	TCGA-AA-3811-01	Colon Adenocarcinoma	R222C	OncoKB: Likely Oncogenic, level NA;CIViC: NA;MyCancerGenome: not present;CancerHotspot: yes;3DHotspot: no	MutationAssessor: impact: high, score: 3.745;SIFT: impact: deleterious, score: 0;Polyphen-2: impact: probably_damaging, score: 1	Missense_Mutation	SNP	amp	8	.	.	.	7	55220274	55220274	C	T	7:g.55220274C>T	ENST00000275493.2:c.664C>T	0.86		137	22		13	1915	2020-06-28
Colorectal Adenocarcinoma (TCGA, PanCancer Atlas)	TCGA-AA-3811-01	Colon Adenocarcinoma	P596L	OncoKB: Likely Oncogenic, level NA;CIViC: NA;MyCancerGenome: not present;CancerHotspot: yes;3DHotspot: no	MutationAssessor: impact: medium, score: 3.375;SIFT: impact: deleterious, score: 0;Polyphen-2: impact: probably_damaging, score: 0.999	Missense_Mutation	SNP	amp	8	.	.	.	7	55233037	55233037	C	T	7:g.55233037C>T	ENST00000275493.2:c.1787C>T	0.84		210	39		26	1915	15/28	3.97709e-06		rs1477025000
Colorectal Adenocarcinoma (TCGA, PanCancer Atlas)	TCGA-DY-A1DF-01	Rectal Adenocarcinoma	P753L	OncoKB: Predicted Oncogenic, level NA;CIViC: NA;MyCancerGenome: not present;CancerHotspot: no;3DHotspot: yes	MutationAssessor: impact: low, score: 0.835;SIFT: impact: deleterious, score: 0.02;Polyphen-2: impact: possibly_damaging, score: 0.881	Missense_Mutation	SNP	gain	6	.	.	.	7	55242488	55242488	C	T	7:g.55242488C>T	ENST00000275493.2:c.2258C>T	0.13		12	79		69	124	19/28	3.97643e-05		rs559717059
Colorectal Adenocarcinoma (TCGA, PanCancer Atlas)	TCGA-AZ-6599-01	Colon Adenocarcinoma	H893Y	OncoKB: Predicted Oncogenic, level NA;CIViC: NA;MyCancerGenome: not present;CancerHotspot: no;3DHotspot: yes	MutationAssessor: impact: low, score: 0.96;SIFT: impact: deleterious, score: 0;Polyphen-2: impact: probably_damaging, score: 0.983	Missense_Mutation	SNP	diploid	1	.	.	.	7	55260510	55260510	C	T	7:g.55260510C>T	ENST00000275493.2:c.2677C>T	0.36		42	74		118	229	22/28
Esophageal Adenocarcinoma (TCGA, PanCancer Atlas)	TCGA-R6-A6XG-01	Esophageal Adenocarcinoma	G598E	OncoKB: Likely Oncogenic, level NA;CIViC: NA;MyCancerGenome: not present;CancerHotspot: yes;3DHotspot: no	MutationAssessor: impact: medium, score: 3.11;SIFT: impact: deleterious, score: 0;Polyphen-2: impact: probably_damaging, score: 0.971	Missense_Mutation	SNP	diploid	36	.	.	.	7	55233043	55233043	G	A	7:g.55233043G>A	ENST00000275493.2:c.1793G>A	0.37		22	37		44	168	15/28
Glioblastoma Multiforme (TCGA, PanCancer Atlas)	TCGA-12-0657-01	Glioblastoma Multiforme	L861Q	OncoKB: Oncogenic, level_3b;CIViC: Predictive: 5;MyCancerGenome: present;CancerHotspot: yes;3DHotspot: yes	MutationAssessor: impact: neutral, score: 0.62;SIFT: impact: deleterious, score: 0;Polyphen-2: impact: probably_damaging, score: 0.983	Missense_Mutation	SNP	amp	92	.	.	.	7	55259524	55259524	T	A	7:g.55259524T>A	ENST00000275493.2:c.2582T>A	0.46		902	1063		262	56	21/28		163380	rs121913444
Glioblastoma Multiforme (TCGA, PanCancer Atlas)	TCGA-02-0003-01	Glioblastoma Multiforme	C620Y	OncoKB: Oncogenic, level NA;CIViC: NA;MyCancerGenome: not present;CancerHotspot: no;3DHotspot: no	MutationAssessor: impact: high, score: 4.235;SIFT: impact: deleterious, score: 0;Polyphen-2: impact: probably_damaging, score: 0.997	Missense_Mutation	SNP	amp	3	.	.	.	7	55233109	55233109	G	A	7:g.55233109G>A	ENST00000275493.2:c.1859G>A	0.44		1564	1974		141	44	15/28			rs150899403
Glioblastoma Multiforme (TCGA, PanCancer Atlas)	TCGA-02-2485-01	Glioblastoma Multiforme	A289D	OncoKB: Likely Oncogenic, level NA;CIViC: NA;MyCancerGenome: not present;CancerHotspot: yes;3DHotspot: yes	MutationAssessor: impact: medium, score: 2.04;SIFT: impact: deleterious, score: 0;Polyphen-2: impact: probably_damaging, score: 0.991	Missense_Mutation	SNP	amp	50	.	.	.	7	55221822	55221822	C	A	7:g.55221822C>A	ENST00000275493.2:c.866C>A	0.94		1490	98		90	55	2020-07-28		376396	rs149840192
Glioblastoma Multiforme (TCGA, PanCancer Atlas)	TCGA-27-1838-01	Glioblastoma Multiforme	A289D	OncoKB: Likely Oncogenic, level NA;CIViC: NA;MyCancerGenome: not present;CancerHotspot: yes;3DHotspot: yes	MutationAssessor: impact: medium, score: 2.04;SIFT: impact: deleterious, score: 0;Polyphen-2: impact: probably_damaging, score: 0.991	Missense_Mutation	SNP	amp	50	.	.	.	7	55221822	55221822	C	A	7:g.55221822C>A	ENST00000275493.2:c.866C>A	0.93		2116	165		109	93	2020-07-28		376396	rs149840192
Glioblastoma Multiforme (TCGA, PanCancer Atlas)	TCGA-06-0876-01	Glioblastoma Multiforme	A289D	OncoKB: Likely Oncogenic, level NA;CIViC: NA;MyCancerGenome: not present;CancerHotspot: yes;3DHotspot: yes	MutationAssessor: impact: medium, score: 2.04;SIFT: impact: deleterious, score: 0;Polyphen-2: impact: probably_damaging, score: 0.991	Missense_Mutation	SNP	amp	50	.	.	.	7	55221822	55221822	C	A	7:g.55221822C>A	ENST00000275493.2:c.866C>A	0.09		277	2709		109	63	2020-07-28		376396	rs149840192
Glioblastoma Multiforme (TCGA, PanCancer Atlas)	TCGA-06-0750-01	Glioblastoma Multiforme	A289D	OncoKB: Likely Oncogenic, level NA;CIViC: NA;MyCancerGenome: not present;CancerHotspot: yes;3DHotspot: yes	MutationAssessor: impact: medium, score: 2.04;SIFT: impact: deleterious, score: 0;Polyphen-2: impact: probably_damaging, score: 0.991	Missense_Mutation	SNP	amp	50	.	.	.	7	55221822	55221822	C	A	7:g.55221822C>A	ENST00000275493.2:c.866C>A	0.17	0.007	438	2192	1	141	33	2020-07-28		376396	rs149840192
Glioblastoma Multiforme (TCGA, PanCancer Atlas)	TCGA-12-0656-01	Glioblastoma Multiforme	A289D	OncoKB: Likely Oncogenic, level NA;CIViC: NA;MyCancerGenome: not present;CancerHotspot: yes;3DHotspot: yes	MutationAssessor: impact: medium, score: 2.04;SIFT: impact: deleterious, score: 0;Polyphen-2: impact: probably_damaging, score: 0.991	Missense_Mutation	SNP	gain	50	.	.	.	7	55221822	55221822	C	A	7:g.55221822C>A	ENST00000275493.2:c.866C>A	0.22		52	188		101	51	2020-07-28		376396	rs149840192
Glioblastoma Multiforme (TCGA, PanCancer Atlas)	TCGA-14-2554-01	Glioblastoma Multiforme	G598V	OncoKB: Oncogenic, level NA;CIViC: Predictive: 5;MyCancerGenome: not present;CancerHotspot: yes;3DHotspot: no	MutationAssessor: impact: high, score: 4.005;SIFT: impact: deleterious, score: 0;Polyphen-2: impact: probably_damaging, score: 0.951	Missense_Mutation	SNP	amp	36	.	.	.	7	55233043	55233043	G	T	7:g.55233043G>T	ENST00000275493.2:c.1793G>T	0.31		1282	2849		166	64	15/28	3.97716e-06	376210	rs139236063
Glioblastoma Multiforme (TCGA, PanCancer Atlas)	TCGA-19-2620-01	Glioblastoma Multiforme	G598V	OncoKB: Oncogenic, level NA;CIViC: Predictive: 5;MyCancerGenome: not present;CancerHotspot: yes;3DHotspot: no	MutationAssessor: impact: high, score: 4.005;SIFT: impact: deleterious, score: 0;Polyphen-2: impact: probably_damaging, score: 0.951	Missense_Mutation	SNP	amp	36	.	.	.	7	55233043	55233043	G	T	7:g.55233043G>T	ENST00000275493.2:c.1793G>T	0.12		269	1957		143	69	15/28	3.97716e-06	376210	rs139236063
Glioblastoma Multiforme (TCGA, PanCancer Atlas)	TCGA-26-1439-01	Glioblastoma Multiforme	G598V	OncoKB: Oncogenic, level NA;CIViC: Predictive: 5;MyCancerGenome: not present;CancerHotspot: yes;3DHotspot: no	MutationAssessor: impact: high, score: 4.005;SIFT: impact: deleterious, score: 0;Polyphen-2: impact: probably_damaging, score: 0.951	Missense_Mutation	SNP	amp	36	.	.	.	7	55233043	55233043	G	T	7:g.55233043G>T	ENST00000275493.2:c.1793G>T	0.51		2354	2271		135	40	15/28	3.97716e-06	376210	rs139236063
Glioblastoma Multiforme (TCGA, PanCancer Atlas)	TCGA-28-1747-01	Glioblastoma Multiforme	G598V	OncoKB: Oncogenic, level NA;CIViC: Predictive: 5;MyCancerGenome: not present;CancerHotspot: yes;3DHotspot: no	MutationAssessor: impact: high, score: 4.005;SIFT: impact: deleterious, score: 0;Polyphen-2: impact: probably_damaging, score: 0.951	Missense_Mutation	SNP	amp	36	.	.	.	7	55233043	55233043	G	T	7:g.55233043G>T	ENST00000275493.2:c.1793G>T	0.12		244	1766		151	43	15/28	3.97716e-06	376210	rs139236063
Glioblastoma Multiforme (TCGA, PanCancer Atlas)	TCGA-28-5213-01	Glioblastoma Multiforme	G598V	OncoKB: Oncogenic, level NA;CIViC: Predictive: 5;MyCancerGenome: not present;CancerHotspot: yes;3DHotspot: no	MutationAssessor: impact: high, score: 4.005;SIFT: impact: deleterious, score: 0;Polyphen-2: impact: probably_damaging, score: 0.951	Missense_Mutation	SNP	gain	36	.	.	.	7	55233043	55233043	G	T	7:g.55233043G>T	ENST00000275493.2:c.1793G>T	0.18		48	220		191	43	15/28	3.97716e-06	376210	rs139236063
Glioblastoma Multiforme (TCGA, PanCancer Atlas)	TCGA-32-1982-01	Glioblastoma Multiforme	G598V	OncoKB: Oncogenic, level NA;CIViC: Predictive: 5;MyCancerGenome: not present;CancerHotspot: yes;3DHotspot: no	MutationAssessor: impact: high, score: 4.005;SIFT: impact: deleterious, score: 0;Polyphen-2: impact: probably_damaging, score: 0.951	Missense_Mutation	SNP	amp	36	.	.	.	7	55233043	55233043	G	T	7:g.55233043G>T	ENST00000275493.2:c.1793G>T	0.85		2416	443		155	66	15/28	3.97716e-06	376210	rs139236063
Glioblastoma Multiforme (TCGA, PanCancer Atlas)	TCGA-76-4931-01	Glioblastoma Multiforme	G598V	OncoKB: Oncogenic, level NA;CIViC: Predictive: 5;MyCancerGenome: not present;CancerHotspot: yes;3DHotspot: no	MutationAssessor: impact: high, score: 4.005;SIFT: impact: deleterious, score: 0;Polyphen-2: impact: probably_damaging, score: 0.951	Missense_Mutation	SNP	amp	36	.	.	.	7	55233043	55233043	G	T	7:g.55233043G>T	ENST00000275493.2:c.1793G>T	0.95		2954	158		245	38	15/28	3.97716e-06	376210	rs139236063
Glioblastoma Multiforme (TCGA, PanCancer Atlas)	TCGA-OX-A56R-01	Glioblastoma Multiforme	G598V	OncoKB: Oncogenic, level NA;CIViC: Predictive: 5;MyCancerGenome: not present;CancerHotspot: yes;3DHotspot: no	MutationAssessor: impact: high, score: 4.005;SIFT: impact: deleterious, score: 0;Polyphen-2: impact: probably_damaging, score: 0.951	Missense_Mutation	SNP	amp	36	.	.	.	7	55233043	55233043	G	T	7:g.55233043G>T	ENST00000275493.2:c.1793G>T	0.43		71	94		88	37	15/28	3.97716e-06	376210	rs139236063
Glioblastoma Multiforme (TCGA, PanCancer Atlas)	TCGA-06-0125-01	Glioblastoma Multiforme	G598V	OncoKB: Oncogenic, level NA;CIViC: Predictive: 5;MyCancerGenome: not present;CancerHotspot: yes;3DHotspot: no	MutationAssessor: impact: high, score: 4.005;SIFT: impact: deleterious, score: 0;Polyphen-2: impact: probably_damaging, score: 0.951	Missense_Mutation	SNP	amp	36	.	.	.	7	55233043	55233043	G	T	7:g.55233043G>T	ENST00000275493.2:c.1793G>T	0.73		3164	1150		146	64	15/28	3.97716e-06	376210	rs139236063
Glioblastoma Multiforme (TCGA, PanCancer Atlas)	TCGA-06-0125-02	Glioblastoma Multiforme	G598V	OncoKB: Oncogenic, level NA;CIViC: Predictive: 5;MyCancerGenome: not present;CancerHotspot: yes;3DHotspot: no	MutationAssessor: impact: high, score: 4.005;SIFT: impact: deleterious, score: 0;Polyphen-2: impact: probably_damaging, score: 0.951	Missense_Mutation	SNP		36	.	.	.	7	55233043	55233043	G	T	7:g.55233043G>T	ENST00000275493.2:c.1793G>T	0.92		2256	208		146	80	15/28	3.97716e-06	376210	rs139236063
Glioblastoma Multiforme (TCGA, PanCancer Atlas)	TCGA-06-0876-01	Glioblastoma Multiforme	G598V	OncoKB: Oncogenic, level NA;CIViC: Predictive: 5;MyCancerGenome: not present;CancerHotspot: yes;3DHotspot: no	MutationAssessor: impact: high, score: 4.005;SIFT: impact: deleterious, score: 0;Polyphen-2: impact: probably_damaging, score: 0.951	Missense_Mutation	SNP	amp	36	.	.	.	7	55233043	55233043	G	T	7:g.55233043G>T	ENST00000275493.2:c.1793G>T	0.31		1091	2421		173	63	15/28	3.97716e-06	376210	rs139236063
Glioblastoma Multiforme (TCGA, PanCancer Atlas)	TCGA-12-0616-01	Glioblastoma Multiforme	G598V	OncoKB: Oncogenic, level NA;CIViC: Predictive: 5;MyCancerGenome: not present;CancerHotspot: yes;3DHotspot: no	MutationAssessor: impact: high, score: 4.005;SIFT: impact: deleterious, score: 0;Polyphen-2: impact: probably_damaging, score: 0.951	Missense_Mutation	SNP	amp	36	.	.	.	7	55233043	55233043	G	T	7:g.55233043G>T	ENST00000275493.2:c.1793G>T	0.31		330	739		203	37	15/28	3.97716e-06	376210	rs139236063
Glioblastoma Multiforme (TCGA, PanCancer Atlas)	TCGA-12-0619-01	Glioblastoma Multiforme	G598V	OncoKB: Oncogenic, level NA;CIViC: Predictive: 5;MyCancerGenome: not present;CancerHotspot: yes;3DHotspot: no	MutationAssessor: impact: high, score: 4.005;SIFT: impact: deleterious, score: 0;Polyphen-2: impact: probably_damaging, score: 0.951	Missense_Mutation	SNP	amp	36	.	.	.	7	55233043	55233043	G	T	7:g.55233043G>T	ENST00000275493.2:c.1793G>T	0.14		625	3897		164	52	15/28	3.97716e-06	376210	rs139236063
Glioblastoma Multiforme (TCGA, PanCancer Atlas)	TCGA-06-0174-01	Glioblastoma Multiforme	G598V	OncoKB: Oncogenic, level NA;CIViC: Predictive: 5;MyCancerGenome: not present;CancerHotspot: yes;3DHotspot: no	MutationAssessor: impact: high, score: 4.005;SIFT: impact: deleterious, score: 0;Polyphen-2: impact: probably_damaging, score: 0.951	Missense_Mutation	SNP	amp	36	.	.	.	7	55233043	55233043	G	T	7:g.55233043G>T	ENST00000275493.2:c.1793G>T	0.06		31	518		98	64	15/28	3.97716e-06	376210	rs139236063
Glioblastoma Multiforme (TCGA, PanCancer Atlas)	TCGA-16-0849-01	Glioblastoma Multiforme	G598V	OncoKB: Oncogenic, level NA;CIViC: Predictive: 5;MyCancerGenome: not present;CancerHotspot: yes;3DHotspot: no	MutationAssessor: impact: high, score: 4.005;SIFT: impact: deleterious, score: 0;Polyphen-2: impact: probably_damaging, score: 0.951	Missense_Mutation	SNP	diploid	36	.	.	.	7	55233043	55233043	G	T	7:g.55233043G>T	ENST00000275493.2:c.1793G>T	0.1		60	534		409	63	15/28	3.97716e-06	376210	rs139236063
Glioblastoma Multiforme (TCGA, PanCancer Atlas)	TCGA-06-A6S1-01	Glioblastoma Multiforme	R222C	OncoKB: Likely Oncogenic, level NA;CIViC: NA;MyCancerGenome: not present;CancerHotspot: yes;3DHotspot: no	MutationAssessor: impact: high, score: 3.745;SIFT: impact: deleterious, score: 0;Polyphen-2: impact: probably_damaging, score: 1	Missense_Mutation	SNP	gain	8	.	.	.	7	55220274	55220274	C	T	7:g.55220274C>T	ENST00000275493.2:c.664C>T	0.06		74	1146		191	45	2020-06-28
Glioblastoma Multiforme (TCGA, PanCancer Atlas)	TCGA-27-2528-01	Glioblastoma Multiforme	R222C	OncoKB: Likely Oncogenic, level NA;CIViC: NA;MyCancerGenome: not present;CancerHotspot: yes;3DHotspot: no	MutationAssessor: impact: high, score: 3.745;SIFT: impact: deleterious, score: 0;Polyphen-2: impact: probably_damaging, score: 1	Missense_Mutation	SNP	amp	8	.	.	.	7	55220274	55220274	C	T	7:g.55220274C>T	ENST00000275493.2:c.664C>T	0.81		1662	390		224	53	2020-06-28
Glioblastoma Multiforme (TCGA, PanCancer Atlas)	TCGA-28-1757-01	Glioblastoma Multiforme	R222C	OncoKB: Likely Oncogenic, level NA;CIViC: NA;MyCancerGenome: not present;CancerHotspot: yes;3DHotspot: no	MutationAssessor: impact: high, score: 3.745;SIFT: impact: deleterious, score: 0;Polyphen-2: impact: probably_damaging, score: 1	Missense_Mutation	SNP	amp	8	.	.	.	7	55220274	55220274	C	T	7:g.55220274C>T	ENST00000275493.2:c.664C>T	0.98		494	11		17	191	2020-06-28
Glioblastoma Multiforme (TCGA, PanCancer Atlas)	TCGA-76-4926-01	Glioblastoma Multiforme	R222C	OncoKB: Likely Oncogenic, level NA;CIViC: NA;MyCancerGenome: not present;CancerHotspot: yes;3DHotspot: no	MutationAssessor: impact: high, score: 3.745;SIFT: impact: deleterious, score: 0;Polyphen-2: impact: probably_damaging, score: 1	Missense_Mutation	SNP	amp	8	.	.	.	7	55220274	55220274	C	T	7:g.55220274C>T	ENST00000275493.2:c.664C>T	0.04		22	591		219	54	2020-06-28
Glioblastoma Multiforme (TCGA, PanCancer Atlas)	TCGA-76-4927-01	Glioblastoma Multiforme	R222C	OncoKB: Likely Oncogenic, level NA;CIViC: NA;MyCancerGenome: not present;CancerHotspot: yes;3DHotspot: no	MutationAssessor: impact: high, score: 3.745;SIFT: impact: deleterious, score: 0;Polyphen-2: impact: probably_damaging, score: 1	Missense_Mutation	SNP		8	.	.	.	7	55220274	55220274	C	T	7:g.55220274C>T	ENST00000275493.2:c.664C>T	0.52		2379	2226		254	43	2020-06-28
Glioblastoma Multiforme (TCGA, PanCancer Atlas)	TCGA-06-0154-01	Glioblastoma Multiforme	R222C	OncoKB: Likely Oncogenic, level NA;CIViC: NA;MyCancerGenome: not present;CancerHotspot: yes;3DHotspot: no	MutationAssessor: impact: high, score: 3.745;SIFT: impact: deleterious, score: 0;Polyphen-2: impact: probably_damaging, score: 1	Missense_Mutation	SNP	amp	8	.	.	.	7	55220274	55220274	C	T	7:g.55220274C>T	ENST00000275493.2:c.664C>T	0.82		2105	456		222	51	2020-06-28
Glioblastoma Multiforme (TCGA, PanCancer Atlas)	TCGA-28-1747-01	Glioblastoma Multiforme	H304Y	OncoKB: Likely Oncogenic, level NA;CIViC: NA;MyCancerGenome: not present;CancerHotspot: yes;3DHotspot: no	MutationAssessor: impact: medium, score: 2.19;SIFT: impact: tolerated, score: 1;Polyphen-2: impact: benign, score: 0.007	Missense_Mutation	SNP	amp	4	.	.	.	7	55223543	55223543	C	T	7:g.55223543C>T	ENST00000275493.2:c.910C>T	0.23		247	841		73	43	2020-08-28
Glioblastoma Multiforme (TCGA, PanCancer Atlas)	TCGA-76-6661-01	Glioblastoma Multiforme	H304Y	OncoKB: Likely Oncogenic, level NA;CIViC: NA;MyCancerGenome: not present;CancerHotspot: yes;3DHotspot: no	MutationAssessor: impact: medium, score: 2.19;SIFT: impact: tolerated, score: 1;Polyphen-2: impact: benign, score: 0.007	Missense_Mutation	SNP	amp	4	.	.	.	7	55223543	55223543	C	T	7:g.55223543C>T	ENST00000275493.2:c.910C>T	0.06		208	3508		75	47	2020-08-28
Glioblastoma Multiforme (TCGA, PanCancer Atlas)	TCGA-06-0155-01	Glioblastoma Multiforme	H304Y	OncoKB: Likely Oncogenic, level NA;CIViC: NA;MyCancerGenome: not present;CancerHotspot: yes;3DHotspot: no	MutationAssessor: impact: medium, score: 2.19;SIFT: impact: tolerated, score: 1;Polyphen-2: impact: benign, score: 0.007	Missense_Mutation	SNP	amp	4	.	.	.	7	55223543	55223543	C	T	7:g.55223543C>T	ENST00000275493.2:c.910C>T	0.23		108	356		92	61	2020-08-28
Glioblastoma Multiforme (TCGA, PanCancer Atlas)	TCGA-02-2466-01	Glioblastoma Multiforme	A289V	OncoKB: Oncogenic, level_4;CIViC: Predictive: 1;MyCancerGenome: not present;CancerHotspot: yes;3DHotspot: yes	MutationAssessor: impact: medium, score: 3.32;SIFT: impact: deleterious, score: 0.02;Polyphen-2: impact: probably_damaging, score: 0.985	Missense_Mutation	SNP	gain	50	.	.	.	7	55221822	55221822	C	T	7:g.55221822C>T	ENST00000275493.2:c.866C>T	0.23		22	74		77	99	2020-07-28		376209	rs149840192
Glioblastoma Multiforme (TCGA, PanCancer Atlas)	TCGA-06-5856-01	Glioblastoma Multiforme	A289V	OncoKB: Oncogenic, level_4;CIViC: Predictive: 1;MyCancerGenome: not present;CancerHotspot: yes;3DHotspot: yes	MutationAssessor: impact: medium, score: 3.32;SIFT: impact: deleterious, score: 0.02;Polyphen-2: impact: probably_damaging, score: 0.985	Missense_Mutation	SNP	amp	50	.	.	.	7	55221822	55221822	C	T	7:g.55221822C>T	ENST00000275493.2:c.866C>T	0.55		839	692		69	54	2020-07-28		376209	rs149840192
Glioblastoma Multiforme (TCGA, PanCancer Atlas)	TCGA-12-3650-01	Glioblastoma Multiforme	A289V	OncoKB: Oncogenic, level_4;CIViC: Predictive: 1;MyCancerGenome: not present;CancerHotspot: yes;3DHotspot: yes	MutationAssessor: impact: medium, score: 3.32;SIFT: impact: deleterious, score: 0.02;Polyphen-2: impact: probably_damaging, score: 0.985	Missense_Mutation	SNP	amp	50	.	.	.	7	55221822	55221822	C	T	7:g.55221822C>T	ENST00000275493.2:c.866C>T	0.88	0.02	4427	604	2	96	46	2020-07-28		376209	rs149840192
Glioblastoma Multiforme (TCGA, PanCancer Atlas)	TCGA-14-1456-01	Glioblastoma Multiforme	A289V	OncoKB: Oncogenic, level_4;CIViC: Predictive: 1;MyCancerGenome: not present;CancerHotspot: yes;3DHotspot: yes	MutationAssessor: impact: medium, score: 3.32;SIFT: impact: deleterious, score: 0.02;Polyphen-2: impact: probably_damaging, score: 0.985	Missense_Mutation	SNP	gain	50	.	.	.	7	55221822	55221822	C	T	7:g.55221822C>T	ENST00000275493.2:c.866C>T	0.23		31	102		106	25	2020-07-28		376209	rs149840192
Glioblastoma Multiforme (TCGA, PanCancer Atlas)	TCGA-28-1752-01	Glioblastoma Multiforme	A289V	OncoKB: Oncogenic, level_4;CIViC: Predictive: 1;MyCancerGenome: not present;CancerHotspot: yes;3DHotspot: yes	MutationAssessor: impact: medium, score: 3.32;SIFT: impact: deleterious, score: 0.02;Polyphen-2: impact: probably_damaging, score: 0.985	Missense_Mutation	SNP	amp	50	.	.	.	7	55221822	55221822	C	T	7:g.55221822C>T	ENST00000275493.2:c.866C>T	0.18		301	1403		93	86	2020-07-28		376209	rs149840192
Glioblastoma Multiforme (TCGA, PanCancer Atlas)	TCGA-32-1970-01	Glioblastoma Multiforme	A289V	OncoKB: Oncogenic, level_4;CIViC: Predictive: 1;MyCancerGenome: not present;CancerHotspot: yes;3DHotspot: yes	MutationAssessor: impact: medium, score: 3.32;SIFT: impact: deleterious, score: 0.02;Polyphen-2: impact: probably_damaging, score: 0.985	Missense_Mutation	SNP	gain	50	.	.	.	7	55221822	55221822	C	T	7:g.55221822C>T	ENST00000275493.2:c.866C>T	0.54		1189	1026		131	70	2020-07-28		376209	rs149840192
Glioblastoma Multiforme (TCGA, PanCancer Atlas)	TCGA-4W-AA9T-01	Glioblastoma Multiforme	A289V	OncoKB: Oncogenic, level_4;CIViC: Predictive: 1;MyCancerGenome: not present;CancerHotspot: yes;3DHotspot: yes	MutationAssessor: impact: medium, score: 3.32;SIFT: impact: deleterious, score: 0.02;Polyphen-2: impact: probably_damaging, score: 0.985	Missense_Mutation	SNP	amp	50	.	.	.	7	55221822	55221822	C	T	7:g.55221822C>T	ENST00000275493.2:c.866C>T	0.88		315	44		31	49	2020-07-28		376209	rs149840192
Glioblastoma Multiforme (TCGA, PanCancer Atlas)	TCGA-81-5911-01	Glioblastoma Multiforme	A289V	OncoKB: Oncogenic, level_4;CIViC: Predictive: 1;MyCancerGenome: not present;CancerHotspot: yes;3DHotspot: yes	MutationAssessor: impact: medium, score: 3.32;SIFT: impact: deleterious, score: 0.02;Polyphen-2: impact: probably_damaging, score: 0.985	Missense_Mutation	SNP	amp	50	.	.	.	7	55221822	55221822	C	T	7:g.55221822C>T	ENST00000275493.2:c.866C>T	0.71		474	196		64	28	2020-07-28		376209	rs149840192
Glioblastoma Multiforme (TCGA, PanCancer Atlas)	TCGA-06-0881-01	Glioblastoma Multiforme	A289V	OncoKB: Oncogenic, level_4;CIViC: Predictive: 1;MyCancerGenome: not present;CancerHotspot: yes;3DHotspot: yes	MutationAssessor: impact: medium, score: 3.32;SIFT: impact: deleterious, score: 0.02;Polyphen-2: impact: probably_damaging, score: 0.985	Missense_Mutation	SNP	amp	50	.	.	.	7	55221822	55221822	C	T	7:g.55221822C>T	ENST00000275493.2:c.866C>T	0.18		90	421		170	19	2020-07-28		376209	rs149840192
Glioblastoma Multiforme (TCGA, PanCancer Atlas)	TCGA-06-0157-01	Glioblastoma Multiforme	A289V	OncoKB: Oncogenic, level_4;CIViC: Predictive: 1;MyCancerGenome: not present;CancerHotspot: yes;3DHotspot: yes	MutationAssessor: impact: medium, score: 3.32;SIFT: impact: deleterious, score: 0.02;Polyphen-2: impact: probably_damaging, score: 0.985	Missense_Mutation	SNP	amp	50	.	.	.	7	55221822	55221822	C	T	7:g.55221822C>T	ENST00000275493.2:c.866C>T	0.93		2272	176		129	46	2020-07-28		376209	rs149840192
Glioblastoma Multiforme (TCGA, PanCancer Atlas)	TCGA-06-0142-01	Glioblastoma Multiforme	A289V	OncoKB: Oncogenic, level_4;CIViC: Predictive: 1;MyCancerGenome: not present;CancerHotspot: yes;3DHotspot: yes	MutationAssessor: impact: medium, score: 3.32;SIFT: impact: deleterious, score: 0.02;Polyphen-2: impact: probably_damaging, score: 0.985	Missense_Mutation	SNP	amp	50	.	.	.	7	55221822	55221822	C	T	7:g.55221822C>T	ENST00000275493.2:c.866C>T	0.04		8	199		111	26	2020-07-28		376209	rs149840192
Glioblastoma Multiforme (TCGA, PanCancer Atlas)	TCGA-14-0786-01	Glioblastoma Multiforme	A289V	OncoKB: Oncogenic, level_4;CIViC: Predictive: 1;MyCancerGenome: not present;CancerHotspot: yes;3DHotspot: yes	MutationAssessor: impact: medium, score: 3.32;SIFT: impact: deleterious, score: 0.02;Polyphen-2: impact: probably_damaging, score: 0.985	Missense_Mutation	SNP	amp	50	.	.	.	7	55221822	55221822	C	T	7:g.55221822C>T	ENST00000275493.2:c.866C>T	0.84	0.01	4057	792	1	96	32	2020-07-28		376209	rs149840192
Glioblastoma Multiforme (TCGA, PanCancer Atlas)	TCGA-06-0211-02	Glioblastoma Multiforme	A289V	OncoKB: Oncogenic, level_4;CIViC: Predictive: 1;MyCancerGenome: not present;CancerHotspot: yes;3DHotspot: yes	MutationAssessor: impact: medium, score: 3.32;SIFT: impact: deleterious, score: 0.02;Polyphen-2: impact: probably_damaging, score: 0.985	Missense_Mutation	SNP		50	.	.	.	7	55221822	55221822	C	T	7:g.55221822C>T	ENST00000275493.2:c.866C>T	0.05		71	1468		167	52	2020-07-28		376209	rs149840192
Glioblastoma Multiforme (TCGA, PanCancer Atlas)	TCGA-06-0743-01	Glioblastoma Multiforme	A289V	OncoKB: Oncogenic, level_4;CIViC: Predictive: 1;MyCancerGenome: not present;CancerHotspot: yes;3DHotspot: yes	MutationAssessor: impact: medium, score: 3.32;SIFT: impact: deleterious, score: 0.02;Polyphen-2: impact: probably_damaging, score: 0.985	Missense_Mutation	SNP	amp	50	.	.	.	7	55221822	55221822	C	T	7:g.55221822C>T	ENST00000275493.2:c.866C>T	0.25		411	1241		137	85	2020-07-28		376209	rs149840192
Glioblastoma Multiforme (TCGA, PanCancer Atlas)	TCGA-14-0790-01	Glioblastoma Multiforme	A289V	OncoKB: Oncogenic, level_4;CIViC: Predictive: 1;MyCancerGenome: not present;CancerHotspot: yes;3DHotspot: yes	MutationAssessor: impact: medium, score: 3.32;SIFT: impact: deleterious, score: 0.02;Polyphen-2: impact: probably_damaging, score: 0.985	Missense_Mutation	SNP	amp	50	.	.	.	7	55221822	55221822	C	T	7:g.55221822C>T	ENST00000275493.2:c.866C>T	0.94		2710	183		68	57	2020-07-28		376209	rs149840192
Glioblastoma Multiforme (TCGA, PanCancer Atlas)	TCGA-06-0747-01	Glioblastoma Multiforme	A289V	OncoKB: Oncogenic, level_4;CIViC: Predictive: 1;MyCancerGenome: not present;CancerHotspot: yes;3DHotspot: yes	MutationAssessor: impact: medium, score: 3.32;SIFT: impact: deleterious, score: 0.02;Polyphen-2: impact: probably_damaging, score: 0.985	Missense_Mutation	SNP	amp	50	.	.	.	7	55221822	55221822	C	T	7:g.55221822C>T	ENST00000275493.2:c.866C>T	0.97		3664	130		121	66	2020-07-28		376209	rs149840192
Glioblastoma Multiforme (TCGA, PanCancer Atlas)	TCGA-32-2632-01	Glioblastoma Multiforme	L62R	OncoKB: Likely Oncogenic, level NA;CIViC: NA;MyCancerGenome: not present;CancerHotspot: yes;3DHotspot: no	MutationAssessor: impact: medium, score: 2.985;SIFT: impact: deleterious, score: 0.01;Polyphen-2: impact: possibly_damaging, score: 0.488	Missense_Mutation	SNP	amp	8	.	.	.	7	55210075	55210075	T	G	7:g.55210075T>G	ENST00000275493.2:c.185T>G	0.96	0.0044	4755	219	1	225	86	2020-02-28
Glioblastoma Multiforme (TCGA, PanCancer Atlas)	TCGA-06-0237-01	Glioblastoma Multiforme	L62R	OncoKB: Likely Oncogenic, level NA;CIViC: NA;MyCancerGenome: not present;CancerHotspot: yes;3DHotspot: no	MutationAssessor: impact: medium, score: 2.985;SIFT: impact: deleterious, score: 0.01;Polyphen-2: impact: possibly_damaging, score: 0.488	Missense_Mutation	SNP	amp	8	.	.	.	7	55210075	55210075	T	G	7:g.55210075T>G	ENST00000275493.2:c.185T>G	0.85		1047	189		195	35	2020-02-28
Glioblastoma Multiforme (TCGA, PanCancer Atlas)	TCGA-28-1752-01	Glioblastoma Multiforme	A289T	OncoKB: Likely Oncogenic, level NA;CIViC: NA;MyCancerGenome: not present;CancerHotspot: yes;3DHotspot: yes	MutationAssessor: impact: medium, score: 2.975;SIFT: impact: deleterious, score: 0;Polyphen-2: impact: probably_damaging, score: 0.966	Missense_Mutation	SNP	amp	50	.	.	.	7	55221821	55221821	G	A	7:g.55221821G>A	ENST00000275493.2:c.865G>A	0.02		31	1684		95	86	2020-07-28		376395	rs769696078
Glioblastoma Multiforme (TCGA, PanCancer Atlas)	TCGA-28-5207-01	Glioblastoma Multiforme	A289T	OncoKB: Likely Oncogenic, level NA;CIViC: NA;MyCancerGenome: not present;CancerHotspot: yes;3DHotspot: yes	MutationAssessor: impact: medium, score: 2.975;SIFT: impact: deleterious, score: 0;Polyphen-2: impact: probably_damaging, score: 0.966	Missense_Mutation	SNP	gain	50	.	.	.	7	55221821	55221821	G	A	7:g.55221821G>A	ENST00000275493.2:c.865G>A	0.43		85	113		110	43	2020-07-28		376395	rs769696078
Glioblastoma Multiforme (TCGA, PanCancer Atlas)	TCGA-32-1991-01	Glioblastoma Multiforme	A289T	OncoKB: Likely Oncogenic, level NA;CIViC: NA;MyCancerGenome: not present;CancerHotspot: yes;3DHotspot: yes	MutationAssessor: impact: medium, score: 2.975;SIFT: impact: deleterious, score: 0;Polyphen-2: impact: probably_damaging, score: 0.966	Missense_Mutation	SNP	amp	50	.	.	.	7	55221821	55221821	G	A	7:g.55221821G>A	ENST00000275493.2:c.865G>A	0.03		152	5755		116	42	2020-07-28		376395	rs769696078
Glioblastoma Multiforme (TCGA, PanCancer Atlas)	TCGA-06-0750-01	Glioblastoma Multiforme	A289T	OncoKB: Likely Oncogenic, level NA;CIViC: NA;MyCancerGenome: not present;CancerHotspot: yes;3DHotspot: yes	MutationAssessor: impact: medium, score: 2.975;SIFT: impact: deleterious, score: 0;Polyphen-2: impact: probably_damaging, score: 0.966	Missense_Mutation	SNP	amp	50	.	.	.	7	55221821	55221821	G	A	7:g.55221821G>A	ENST00000275493.2:c.865G>A	0.14		360	2303		146	33	2020-07-28		376395	rs769696078
Glioblastoma Multiforme (TCGA, PanCancer Atlas)	TCGA-06-0878-01	Glioblastoma Multiforme	A289T	OncoKB: Likely Oncogenic, level NA;CIViC: NA;MyCancerGenome: not present;CancerHotspot: yes;3DHotspot: yes	MutationAssessor: impact: medium, score: 2.975;SIFT: impact: deleterious, score: 0;Polyphen-2: impact: probably_damaging, score: 0.966	Missense_Mutation	SNP	amp	50	.	.	.	7	55221821	55221821	G	A	7:g.55221821G>A	ENST00000275493.2:c.865G>A	0.03		54	2052		129	40	2020-07-28		376395	rs769696078
Glioblastoma Multiforme (TCGA, PanCancer Atlas)	TCGA-06-0749-01	Glioblastoma Multiforme	A289T	OncoKB: Likely Oncogenic, level NA;CIViC: NA;MyCancerGenome: not present;CancerHotspot: yes;3DHotspot: yes	MutationAssessor: impact: medium, score: 2.975;SIFT: impact: deleterious, score: 0;Polyphen-2: impact: probably_damaging, score: 0.966	Missense_Mutation	SNP	gain	50	.	.	.	7	55221821	55221821	G	A	7:g.55221821G>A	ENST00000275493.2:c.865G>A	0.24		37	120		135	47	2020-07-28		376395	rs769696078
Glioblastoma Multiforme (TCGA, PanCancer Atlas)	TCGA-06-0750-01	Glioblastoma Multiforme	P596R	OncoKB: Likely Oncogenic, level NA;CIViC: NA;MyCancerGenome: not present;CancerHotspot: yes;3DHotspot: no	MutationAssessor: impact: medium, score: 2.825;SIFT: impact: deleterious, score: 0.01;Polyphen-2: impact: probably_damaging, score: 0.999	Missense_Mutation	SNP	amp	8	.	.	.	7	55233037	55233037	C	G	7:g.55233037C>G	ENST00000275493.2:c.1787C>G	0.23		773	2650		173	33	15/28
Glioblastoma Multiforme (TCGA, PanCancer Atlas)	TCGA-06-2565-01	Glioblastoma Multiforme	R108K	OncoKB: Oncogenic, level_4;CIViC: Predictive: 1;MyCancerGenome: not present;CancerHotspot: yes;3DHotspot: yes	MutationAssessor: impact: medium, score: 3.11;SIFT: impact: deleterious, score: 0;Polyphen-2: impact: probably_damaging, score: 1	Missense_Mutation	SNP	amp	17	.	.	.	7	55211080	55211080	G	A	7:g.55211080G>A	ENST00000275493.2:c.323G>A	0.94		3894	237		138	44	2020-03-28		376207	rs1057519828
Glioblastoma Multiforme (TCGA, PanCancer Atlas)	TCGA-27-1831-01	Glioblastoma Multiforme	R108K	OncoKB: Oncogenic, level_4;CIViC: Predictive: 1;MyCancerGenome: not present;CancerHotspot: yes;3DHotspot: yes	MutationAssessor: impact: medium, score: 3.11;SIFT: impact: deleterious, score: 0;Polyphen-2: impact: probably_damaging, score: 1	Missense_Mutation	SNP	amp	17	.	.	.	7	55211080	55211080	G	A	7:g.55211080G>A	ENST00000275493.2:c.323G>A	0.43	0.0067	2112	2797	1	149	51	2020-03-28		376207	rs1057519828
Glioblastoma Multiforme (TCGA, PanCancer Atlas)	TCGA-06-0876-01	Glioblastoma Multiforme	R108K	OncoKB: Oncogenic, level_4;CIViC: Predictive: 1;MyCancerGenome: not present;CancerHotspot: yes;3DHotspot: yes	MutationAssessor: impact: medium, score: 3.11;SIFT: impact: deleterious, score: 0;Polyphen-2: impact: probably_damaging, score: 1	Missense_Mutation	SNP	amp	17	.	.	.	7	55211080	55211080	G	A	7:g.55211080G>A	ENST00000275493.2:c.323G>A	0.31		839	1849		135	63	2020-03-28		376207	rs1057519828
Glioblastoma Multiforme (TCGA, PanCancer Atlas)	TCGA-06-0158-01	Glioblastoma Multiforme	R108K	OncoKB: Oncogenic, level_4;CIViC: Predictive: 1;MyCancerGenome: not present;CancerHotspot: yes;3DHotspot: yes	MutationAssessor: impact: medium, score: 3.11;SIFT: impact: deleterious, score: 0;Polyphen-2: impact: probably_damaging, score: 1	Missense_Mutation	SNP	amp	17	.	.	.	7	55211080	55211080	G	A	7:g.55211080G>A	ENST00000275493.2:c.323G>A	0.07	0.0076	187	2495	1	130	49	2020-03-28		376207	rs1057519828
Glioblastoma Multiforme (TCGA, PanCancer Atlas)	TCGA-06-1804-01	Glioblastoma Multiforme	D256Y	OncoKB: Likely Oncogenic, level NA;CIViC: NA;MyCancerGenome: not present;CancerHotspot: no;3DHotspot: yes	MutationAssessor: impact: medium, score: 2.04;SIFT: impact: deleterious, score: 0;Polyphen-2: impact: probably_damaging, score: 0.969	Missense_Mutation	SNP	gain	5	.	.	.	7	55221722	55221722	G	T	7:g.55221722G>T	ENST00000275493.2:c.766G>T	0.15		26	153		77	67	2020-07-28
Glioblastoma Multiforme (TCGA, PanCancer Atlas)	TCGA-06-2563-01	Glioblastoma Multiforme	R252C	OncoKB: Likely Neutral, level NA;CIViC: NA;MyCancerGenome: not present;CancerHotspot: yes;3DHotspot: yes	MutationAssessor: impact: medium, score: 3.205;SIFT: impact: deleterious, score: 0.03;Polyphen-2: impact: possibly_damaging, score: 0.882	Missense_Mutation	SNP	amp	12	.	.	.	7	55221710	55221710	C	T	7:g.55221710C>T	ENST00000275493.2:c.754C>T	0.95	0.0064	2513	138	1	156	66	2020-07-28
Glioblastoma Multiforme (TCGA, PanCancer Atlas)	TCGA-81-5910-01	Glioblastoma Multiforme	R252C	OncoKB: Likely Neutral, level NA;CIViC: NA;MyCancerGenome: not present;CancerHotspot: yes;3DHotspot: yes	MutationAssessor: impact: medium, score: 3.205;SIFT: impact: deleterious, score: 0.03;Polyphen-2: impact: possibly_damaging, score: 0.882	Missense_Mutation	SNP	amp	12	.	.	.	7	55221710	55221710	C	T	7:g.55221710C>T	ENST00000275493.2:c.754C>T	0.1		102	914		60	43	2020-07-28
Glioblastoma Multiforme (TCGA, PanCancer Atlas)	TCGA-RR-A6KC-01	Glioblastoma Multiforme	R252C	OncoKB: Likely Neutral, level NA;CIViC: NA;MyCancerGenome: not present;CancerHotspot: yes;3DHotspot: yes	MutationAssessor: impact: medium, score: 3.205;SIFT: impact: deleterious, score: 0.03;Polyphen-2: impact: possibly_damaging, score: 0.882	Missense_Mutation	SNP	amp	12	.	.	.	7	55221710	55221710	C	T	7:g.55221710C>T	ENST00000275493.2:c.754C>T	0.41	0.01	332	484	1	77	39	2020-07-28
Glioblastoma Multiforme (TCGA, PanCancer Atlas)	TCGA-12-3652-01	Glioblastoma Multiforme	R252P	OncoKB: Likely Oncogenic, level NA;CIViC: NA;MyCancerGenome: not present;CancerHotspot: yes;3DHotspot: yes	MutationAssessor: impact: high, score: 3.55;SIFT: impact: tolerated, score: 0.06;Polyphen-2: impact: possibly_damaging, score: 0.868	Missense_Mutation	SNP	amp	12	.	.	.	7	55221711	55221711	G	C	7:g.55221711G>C	ENST00000275493.2:c.755G>C	0.1		71	623		146	54	2020-07-28
Glioblastoma Multiforme (TCGA, PanCancer Atlas)	TCGA-14-1395-01	Glioblastoma Multiforme	S229C	OncoKB: Oncogenic, level NA;CIViC: NA;MyCancerGenome: not present;CancerHotspot: no;3DHotspot: no	MutationAssessor: impact: medium, score: 2.765;SIFT: impact: deleterious, score: 0;Polyphen-2: impact: probably_damaging, score: 0.931	Missense_Mutation	SNP	amp	1	.	.	.	7	55220295	55220295	A	T	7:g.55220295A>T	ENST00000275493.2:c.685A>T	0.78		1932	545		161	45	2020-06-28
Glioblastoma Multiforme (TCGA, PanCancer Atlas)	TCGA-14-1455-01	Glioblastoma Multiforme	T363I	OncoKB: Likely Oncogenic, level NA;CIViC: NA;MyCancerGenome: not present;CancerHotspot: yes;3DHotspot: no	MutationAssessor: impact: high, score: 4.02;SIFT: impact: deleterious, score: 0;Polyphen-2: impact: probably_damaging, score: 0.992	Missense_Mutation	SNP	gain	2	.	.	.	7	55224307	55224307	C	T	7:g.55224307C>T	ENST00000275493.2:c.1088C>T	0.22		68	248		144	64	2020-09-28			rs1164954595
Glioblastoma Multiforme (TCGA, PanCancer Atlas)	TCGA-28-1749-01	Glioblastoma Multiforme	T363I	OncoKB: Likely Oncogenic, level NA;CIViC: NA;MyCancerGenome: not present;CancerHotspot: yes;3DHotspot: no	MutationAssessor: impact: high, score: 4.02;SIFT: impact: deleterious, score: 0;Polyphen-2: impact: probably_damaging, score: 0.992	Missense_Mutation	SNP	amp	2	.	.	.	7	55224307	55224307	C	T	7:g.55224307C>T	ENST00000275493.2:c.1088C>T	0.23		1457	4822		292	44	2020-09-28			rs1164954595
Glioblastoma Multiforme (TCGA, PanCancer Atlas)	TCGA-16-1045-01	Glioblastoma Multiforme	T263P	OncoKB: Oncogenic, level_4;CIViC: Predictive: 1;MyCancerGenome: not present;CancerHotspot: yes;3DHotspot: yes	MutationAssessor: impact: medium, score: 2.32;SIFT: impact: tolerated, score: 0.19;Polyphen-2: impact: benign, score: 0.236	Missense_Mutation	SNP	amp	7	.	.	.	7	55221743	55221743	A	C	7:g.55221743A>C	ENST00000275493.2:c.787A>C	0.91	0.0072	2045	200	1	137	71	2020-07-28		376208	rs1057519829
Glioblastoma Multiforme (TCGA, PanCancer Atlas)	TCGA-06-0211-01	Glioblastoma Multiforme	T263P	OncoKB: Oncogenic, level_4;CIViC: Predictive: 1;MyCancerGenome: not present;CancerHotspot: yes;3DHotspot: yes	MutationAssessor: impact: medium, score: 2.32;SIFT: impact: tolerated, score: 0.19;Polyphen-2: impact: benign, score: 0.236	Missense_Mutation	SNP	amp	7	.	.	.	7	55221743	55221743	A	C	7:g.55221743A>C	ENST00000275493.2:c.787A>C	0.08	0.0089	78	897	2	222	55	2020-07-28		376208	rs1057519829
Glioblastoma Multiforme (TCGA, PanCancer Atlas)	TCGA-12-0670-01	Glioblastoma Multiforme	T263P	OncoKB: Oncogenic, level_4;CIViC: Predictive: 1;MyCancerGenome: not present;CancerHotspot: yes;3DHotspot: yes	MutationAssessor: impact: medium, score: 2.32;SIFT: impact: tolerated, score: 0.19;Polyphen-2: impact: benign, score: 0.236	Missense_Mutation	SNP	amp	7	.	.	.	7	55221743	55221743	A	C	7:g.55221743A>C	ENST00000275493.2:c.787A>C	0.7	0.0018	2474	1055	1	565	53	2020-07-28		376208	rs1057519829
Glioblastoma Multiforme (TCGA, PanCancer Atlas)	TCGA-16-1048-01	Glioblastoma Multiforme	F254I	OncoKB: Predicted Oncogenic, level NA;CIViC: NA;MyCancerGenome: not present;CancerHotspot: no;3DHotspot: yes	MutationAssessor: impact: medium, score: 3.29;SIFT: impact: deleterious, score: 0;Polyphen-2: impact: probably_damaging, score: 0.996	Missense_Mutation	SNP	amp		.	.	.	7	55221716	55221716	T	A	7:g.55221716T>A	ENST00000275493.2:c.760T>A	0.95		2274	128		163	63	2020-07-28
Glioblastoma Multiforme (TCGA, PanCancer Atlas)	TCGA-28-5209-01	Glioblastoma Multiforme	G598A	OncoKB: Likely Neutral, level NA;CIViC: NA;MyCancerGenome: not present;CancerHotspot: yes;3DHotspot: no	MutationAssessor: impact: medium, score: 3.155;SIFT: impact: deleterious, score: 0.01;Polyphen-2: impact: probably_damaging, score: 0.97	Missense_Mutation	SNP	amp	36	.	.	.	7	55233043	55233043	G	C	7:g.55233043G>C	ENST00000275493.2:c.1793G>C	0.12		445	3256		214	81	15/28		376399	rs139236063
Glioblastoma Multiforme (TCGA, PanCancer Atlas)	TCGA-06-0158-01	Glioblastoma Multiforme	G598A	OncoKB: Likely Neutral, level NA;CIViC: NA;MyCancerGenome: not present;CancerHotspot: yes;3DHotspot: no	MutationAssessor: impact: medium, score: 3.155;SIFT: impact: deleterious, score: 0.01;Polyphen-2: impact: probably_damaging, score: 0.97	Missense_Mutation	SNP	amp	36	.	.	.	7	55233043	55233043	G	C	7:g.55233043G>C	ENST00000275493.2:c.1793G>C	0.01		57	4098		177	49	15/28		376399	rs139236063
Glioblastoma Multiforme (TCGA, PanCancer Atlas)	TCGA-76-6191-01	Glioblastoma Multiforme	C620W	OncoKB: Likely Oncogenic, level NA;CIViC: NA;MyCancerGenome: not present;CancerHotspot: no;3DHotspot: no	MutationAssessor: impact: high, score: 4.58;SIFT: impact: deleterious, score: 0;Polyphen-2: impact: probably_damaging, score: 0.999	Missense_Mutation	SNP	gain	3	.	.	.	7	55233110	55233110	C	G	7:g.55233110C>G	ENST00000275493.2:c.1860C>G	0.23		17	58		64	50	15/28
Glioblastoma Multiforme (TCGA, PanCancer Atlas)	TCGA-12-0691-01	Glioblastoma Multiforme	D256G	OncoKB: Likely Oncogenic, level NA;CIViC: NA;MyCancerGenome: not present;CancerHotspot: no;3DHotspot: yes	MutationAssessor: impact: medium, score: 3.215;SIFT: impact: deleterious, score: 0.02;Polyphen-2: impact: probably_damaging, score: 0.995	Missense_Mutation	SNP	gain	5	.	.	.	7	55221723	55221723	A	G	7:g.55221723A>G	ENST00000275493.2:c.767A>G	0.3		61	144		224	58	2020-07-28
Glioblastoma Multiforme (TCGA, PanCancer Atlas)	TCGA-06-0650-01	Glioblastoma Multiforme	E709K	OncoKB: Oncogenic, level NA;CIViC: NA;MyCancerGenome: not present;CancerHotspot: yes;3DHotspot: no	MutationAssessor: impact: medium, score: 2.53;SIFT: impact: deleterious, score: 0.01;Polyphen-2: impact: possibly_damaging, score: 0.618	Missense_Mutation	SNP	amp	48	.	.	.	7	55241677	55241677	G	A	7:g.55241677G>A	ENST00000275493.2:c.2125G>A	0.02		20	1011		80	34	18/28	7.95267e-06	177646	rs727504256
Glioblastoma Multiforme (TCGA, PanCancer Atlas)	TCGA-06-2565-01	Glioblastoma Multiforme	S645C	OncoKB: Likely Oncogenic, level NA;CIViC: NA;MyCancerGenome: not present;CancerHotspot: no;3DHotspot: no	MutationAssessor: impact: medium, score: 2.67;SIFT: impact: tolerated, score: 0.18;Polyphen-2: impact: probably_damaging, score: 0.982	Missense_Mutation	SNP	amp	2	.	.	.	7	55240690	55240690	C	G	7:g.55240690C>G	ENST00000275493.2:c.1934C>G	0.04		177	4568		138	44	17/28			rs772046081
Glioblastoma Multiforme (TCGA, PanCancer Atlas)	TCGA-12-0657-01	Glioblastoma Multiforme	S645C	OncoKB: Likely Oncogenic, level NA;CIViC: NA;MyCancerGenome: not present;CancerHotspot: no;3DHotspot: no	MutationAssessor: impact: medium, score: 2.67;SIFT: impact: tolerated, score: 0.18;Polyphen-2: impact: probably_damaging, score: 0.982	Missense_Mutation	SNP	amp	2	.	.	.	7	55240690	55240690	C	G	7:g.55240690C>G	ENST00000275493.2:c.1934C>G	0.12		133	972		96	56	17/28			rs772046081
Glioblastoma Multiforme (TCGA, PanCancer Atlas)	TCGA-12-0829-01	Glioblastoma Multiforme	S645C	OncoKB: Likely Oncogenic, level NA;CIViC: NA;MyCancerGenome: not present;CancerHotspot: no;3DHotspot: no	MutationAssessor: impact: medium, score: 2.67;SIFT: impact: tolerated, score: 0.18;Polyphen-2: impact: probably_damaging, score: 0.982	Missense_Mutation	SNP	amp	2	.	.	.	7	55240690	55240690	C	G	7:g.55240690C>G	ENST00000275493.2:c.1934C>G	0.76		510	163		103	611	17/28			rs772046081
Glioblastoma Multiforme (TCGA, PanCancer Atlas)	TCGA-06-2567-01	Glioblastoma Multiforme	P596S	OncoKB: Likely Oncogenic, level NA;CIViC: NA;MyCancerGenome: not present;CancerHotspot: yes;3DHotspot: no	MutationAssessor: impact: medium, score: 2.585;SIFT: impact: deleterious, score: 0;Polyphen-2: impact: probably_damaging, score: 0.93	Missense_Mutation	SNP	gain	8	.	.	.	7	55233036	55233036	C	T	7:g.55233036C>T	ENST00000275493.2:c.1786C>T	0.04		12	259		175	48	15/28
Glioblastoma Multiforme (TCGA, PanCancer Atlas)	TCGA-28-1747-01	Glioblastoma Multiforme	R108G	OncoKB: Likely Oncogenic, level NA;CIViC: NA;MyCancerGenome: not present;CancerHotspot: yes;3DHotspot: yes	MutationAssessor: impact: medium, score: 3.07;SIFT: impact: deleterious, score: 0;Polyphen-2: impact: probably_damaging, score: 1	Missense_Mutation	SNP	amp	17	.	.	.	7	55211079	55211079	A	G	7:g.55211079A>G	ENST00000275493.2:c.322A>G	0.06		76	1296		124	43	2020-03-28		376400	rs1057519888
Head and Neck Squamous Cell Carcinoma (TCGA, PanCancer Atlas)	TCGA-CV-7252-01	Head and Neck Squamous Cell Carcinoma	A289T	OncoKB: Likely Oncogenic, level NA;CIViC: NA;MyCancerGenome: not present;CancerHotspot: yes;3DHotspot: yes	MutationAssessor: impact: medium, score: 2.975;SIFT: impact: deleterious, score: 0;Polyphen-2: impact: probably_damaging, score: 0.966	Missense_Mutation	SNP	diploid	50	.	.	.	7	55221821	55221821	G	A	7:g.55221821G>A	ENST00000275493.2:c.865G>A	0.17		11	53		73	232	2020-07-28		376395	rs769696078
Head and Neck Squamous Cell Carcinoma (TCGA, PanCancer Atlas)	TCGA-CV-7250-01	Head and Neck Squamous Cell Carcinoma	S229C	OncoKB: Oncogenic, level NA;CIViC: NA;MyCancerGenome: not present;CancerHotspot: no;3DHotspot: no	MutationAssessor: impact: medium, score: 2.765;SIFT: impact: deleterious, score: 0;Polyphen-2: impact: probably_damaging, score: 0.931	Missense_Mutation	SNP	diploid	1	.	.	.	7	55220295	55220295	A	T	7:g.55220295A>T	ENST00000275493.2:c.685A>T	0.39		57	90		239	246	2020-06-28
Head and Neck Squamous Cell Carcinoma (TCGA, PanCancer Atlas)	TCGA-IQ-7630-01	Head and Neck Squamous Cell Carcinoma	G588S	OncoKB: Likely Oncogenic, level NA;CIViC: NA;MyCancerGenome: not present;CancerHotspot: no;3DHotspot: no	MutationAssessor: impact: medium, score: 2.16;SIFT: impact: deleterious, score: 0.03;Polyphen-2: impact: possibly_damaging, score: 0.792	Missense_Mutation	SNP	diploid		.	.	.	7	55233012	55233012	G	A	7:g.55233012G>A	ENST00000275493.2:c.1762G>A	0.36		26	46		97	110	15/28	3.97728e-06		rs989939484
Brain Lower Grade Glioma (TCGA, PanCancer Atlas)	TCGA-DU-7013-01	Astrocytoma	G598V	OncoKB: Oncogenic, level NA;CIViC: Predictive: 5;MyCancerGenome: not present;CancerHotspot: yes;3DHotspot: no	MutationAssessor: impact: high, score: 4.005;SIFT: impact: deleterious, score: 0;Polyphen-2: impact: probably_damaging, score: 0.951	Missense_Mutation	SNP	amp	36	.	.	.	7	55233043	55233043	G	T	7:g.55233043G>T	ENST00000275493.2:c.1793G>T	0.96	0.02	1626	70	2	118	36	15/28	3.97716e-06	376210	rs139236063
Brain Lower Grade Glioma (TCGA, PanCancer Atlas)	TCGA-DU-8162-01	Oligoastrocytoma	G598V	OncoKB: Oncogenic, level NA;CIViC: Predictive: 5;MyCancerGenome: not present;CancerHotspot: yes;3DHotspot: no	MutationAssessor: impact: high, score: 4.005;SIFT: impact: deleterious, score: 0;Polyphen-2: impact: probably_damaging, score: 0.951	Missense_Mutation	SNP	amp	36	.	.	.	7	55233043	55233043	G	T	7:g.55233043G>T	ENST00000275493.2:c.1793G>T	0.57		195	149		294	22	15/28	3.97716e-06	376210	rs139236063
Brain Lower Grade Glioma (TCGA, PanCancer Atlas)	TCGA-FG-A4MU-01	Oligoastrocytoma	G598V	OncoKB: Oncogenic, level NA;CIViC: Predictive: 5;MyCancerGenome: not present;CancerHotspot: yes;3DHotspot: no	MutationAssessor: impact: high, score: 4.005;SIFT: impact: deleterious, score: 0;Polyphen-2: impact: probably_damaging, score: 0.951	Missense_Mutation	SNP	amp	36	.	.	.	7	55233043	55233043	G	T	7:g.55233043G>T	ENST00000275493.2:c.1793G>T	0.96		5330	228		119	53	15/28	3.97716e-06	376210	rs139236063
Brain Lower Grade Glioma (TCGA, PanCancer Atlas)	TCGA-HT-A5RC-01	Astrocytoma	G598V	OncoKB: Oncogenic, level NA;CIViC: Predictive: 5;MyCancerGenome: not present;CancerHotspot: yes;3DHotspot: no	MutationAssessor: impact: high, score: 4.005;SIFT: impact: deleterious, score: 0;Polyphen-2: impact: probably_damaging, score: 0.951	Missense_Mutation	SNP	amp	36	.	.	.	7	55233043	55233043	G	T	7:g.55233043G>T	ENST00000275493.2:c.1793G>T	0.42		1368	1867		101	48	15/28	3.97716e-06	376210	rs139236063
Brain Lower Grade Glioma (TCGA, PanCancer Atlas)	TCGA-QH-A6XC-01	Astrocytoma	G598V	OncoKB: Oncogenic, level NA;CIViC: Predictive: 5;MyCancerGenome: not present;CancerHotspot: yes;3DHotspot: no	MutationAssessor: impact: high, score: 4.005;SIFT: impact: deleterious, score: 0;Polyphen-2: impact: probably_damaging, score: 0.951	Missense_Mutation	SNP	amp	36	.	.	.	7	55233043	55233043	G	T	7:g.55233043G>T	ENST00000275493.2:c.1793G>T	0.91		1299	127		76	42	15/28	3.97716e-06	376210	rs139236063
Brain Lower Grade Glioma (TCGA, PanCancer Atlas)	TCGA-VM-A8CD-01	Astrocytoma	G598V	OncoKB: Oncogenic, level NA;CIViC: Predictive: 5;MyCancerGenome: not present;CancerHotspot: yes;3DHotspot: no	MutationAssessor: impact: high, score: 4.005;SIFT: impact: deleterious, score: 0;Polyphen-2: impact: probably_damaging, score: 0.951	Missense_Mutation	SNP	diploid	36	.	.	.	7	55233043	55233043	G	T	7:g.55233043G>T	ENST00000275493.2:c.1793G>T	0.22		15	53		77	22	15/28	3.97716e-06	376210	rs139236063
Brain Lower Grade Glioma (TCGA, PanCancer Atlas)	TCGA-DU-A5TT-01	Oligodendroglioma	A289V	OncoKB: Oncogenic, level_4;CIViC: Predictive: 1;MyCancerGenome: not present;CancerHotspot: yes;3DHotspot: yes	MutationAssessor: impact: medium, score: 3.32;SIFT: impact: deleterious, score: 0.02;Polyphen-2: impact: probably_damaging, score: 0.985	Missense_Mutation	SNP	gain	50	.	.	.	7	55221822	55221822	C	T	7:g.55221822C>T	ENST00000275493.2:c.866C>T	0.45		60	72		87	45	2020-07-28		376209	rs149840192
Brain Lower Grade Glioma (TCGA, PanCancer Atlas)	TCGA-E1-A7YM-01	Astrocytoma	A289V	OncoKB: Oncogenic, level_4;CIViC: Predictive: 1;MyCancerGenome: not present;CancerHotspot: yes;3DHotspot: yes	MutationAssessor: impact: medium, score: 3.32;SIFT: impact: deleterious, score: 0.02;Polyphen-2: impact: probably_damaging, score: 0.985	Missense_Mutation	SNP	gain	50	.	.	.	7	55221822	55221822	C	T	7:g.55221822C>T	ENST00000275493.2:c.866C>T	0.18		10	47		35	35	2020-07-28		376209	rs149840192
Brain Lower Grade Glioma (TCGA, PanCancer Atlas)	TCGA-FG-6692-01	Oligodendroglioma	A289V	OncoKB: Oncogenic, level_4;CIViC: Predictive: 1;MyCancerGenome: not present;CancerHotspot: yes;3DHotspot: yes	MutationAssessor: impact: medium, score: 3.32;SIFT: impact: deleterious, score: 0.02;Polyphen-2: impact: probably_damaging, score: 0.985	Missense_Mutation	SNP	amp	50	.	.	.	7	55221822	55221822	C	T	7:g.55221822C>T	ENST00000275493.2:c.866C>T	0.95	0.01	2258	113	1	92	63	2020-07-28		376209	rs149840192
Brain Lower Grade Glioma (TCGA, PanCancer Atlas)	TCGA-FG-A70Z-01	Oligoastrocytoma	A289V	OncoKB: Oncogenic, level_4;CIViC: Predictive: 1;MyCancerGenome: not present;CancerHotspot: yes;3DHotspot: yes	MutationAssessor: impact: medium, score: 3.32;SIFT: impact: deleterious, score: 0.02;Polyphen-2: impact: probably_damaging, score: 0.985	Missense_Mutation	SNP	amp	50	.	.	.	7	55221822	55221822	C	T	7:g.55221822C>T	ENST00000275493.2:c.866C>T	0.88		723	100		87	47	2020-07-28		376209	rs149840192
Brain Lower Grade Glioma (TCGA, PanCancer Atlas)	TCGA-KT-A7W1-01	Astrocytoma	A289V	OncoKB: Oncogenic, level_4;CIViC: Predictive: 1;MyCancerGenome: not present;CancerHotspot: yes;3DHotspot: yes	MutationAssessor: impact: medium, score: 3.32;SIFT: impact: deleterious, score: 0.02;Polyphen-2: impact: probably_damaging, score: 0.985	Missense_Mutation	SNP	amp	50	.	.	.	7	55221822	55221822	C	T	7:g.55221822C>T	ENST00000275493.2:c.866C>T	0.02		27	1458		43	39	2020-07-28		376209	rs149840192
Brain Lower Grade Glioma (TCGA, PanCancer Atlas)	TCGA-TM-A7C3-01	Astrocytoma	A289V	OncoKB: Oncogenic, level_4;CIViC: Predictive: 1;MyCancerGenome: not present;CancerHotspot: yes;3DHotspot: yes	MutationAssessor: impact: medium, score: 3.32;SIFT: impact: deleterious, score: 0.02;Polyphen-2: impact: probably_damaging, score: 0.985	Missense_Mutation	SNP	amp	50	.	.	.	7	55221822	55221822	C	T	7:g.55221822C>T	ENST00000275493.2:c.866C>T	0.71		943	390		79	56	2020-07-28		376209	rs149840192
Brain Lower Grade Glioma (TCGA, PanCancer Atlas)	TCGA-E1-A7Z2-01	Oligodendroglioma	L62R	OncoKB: Likely Oncogenic, level NA;CIViC: NA;MyCancerGenome: not present;CancerHotspot: yes;3DHotspot: no	MutationAssessor: impact: medium, score: 2.985;SIFT: impact: deleterious, score: 0.01;Polyphen-2: impact: possibly_damaging, score: 0.488	Missense_Mutation	SNP	gain	8	.	.	.	7	55210075	55210075	T	G	7:g.55210075T>G	ENST00000275493.2:c.185T>G	0.2		46	183		134	29	2020-02-28
Brain Lower Grade Glioma (TCGA, PanCancer Atlas)	TCGA-S9-A7IX-01	Astrocytoma	L62R	OncoKB: Likely Oncogenic, level NA;CIViC: NA;MyCancerGenome: not present;CancerHotspot: yes;3DHotspot: no	MutationAssessor: impact: medium, score: 2.985;SIFT: impact: deleterious, score: 0.01;Polyphen-2: impact: possibly_damaging, score: 0.488	Missense_Mutation	SNP	amp	8	.	.	.	7	55210075	55210075	T	G	7:g.55210075T>G	ENST00000275493.2:c.185T>G	0.95		1415	78		95	27	2020-02-28
Brain Lower Grade Glioma (TCGA, PanCancer Atlas)	TCGA-S9-A7R2-01	Astrocytoma	L62R	OncoKB: Likely Oncogenic, level NA;CIViC: NA;MyCancerGenome: not present;CancerHotspot: yes;3DHotspot: no	MutationAssessor: impact: medium, score: 2.985;SIFT: impact: deleterious, score: 0.01;Polyphen-2: impact: possibly_damaging, score: 0.488	Missense_Mutation	SNP	gain	8	.	.	.	7	55210075	55210075	T	G	7:g.55210075T>G	ENST00000275493.2:c.185T>G	0.24		41	129		109	36	2020-02-28
Brain Lower Grade Glioma (TCGA, PanCancer Atlas)	TCGA-HT-8107-01	Oligodendroglioma	R108K	OncoKB: Oncogenic, level_4;CIViC: Predictive: 1;MyCancerGenome: not present;CancerHotspot: yes;3DHotspot: yes	MutationAssessor: impact: medium, score: 3.11;SIFT: impact: deleterious, score: 0;Polyphen-2: impact: probably_damaging, score: 1	Missense_Mutation	SNP	diploid	17	.	.	.	7	55211080	55211080	G	A	7:g.55211080G>A	ENST00000275493.2:c.323G>A	0.15		23	134		104	1	2020-03-28		376207	rs1057519828
Brain Lower Grade Glioma (TCGA, PanCancer Atlas)	TCGA-HT-8110-01	Astrocytoma	R108K	OncoKB: Oncogenic, level_4;CIViC: Predictive: 1;MyCancerGenome: not present;CancerHotspot: yes;3DHotspot: yes	MutationAssessor: impact: medium, score: 3.11;SIFT: impact: deleterious, score: 0;Polyphen-2: impact: probably_damaging, score: 1	Missense_Mutation	SNP	amp	17	.	.	.	7	55211080	55211080	G	A	7:g.55211080G>A	ENST00000275493.2:c.323G>A	0.94		699	46		85	30	2020-03-28		376207	rs1057519828
Brain Lower Grade Glioma (TCGA, PanCancer Atlas)	TCGA-DU-5852-01	Oligoastrocytoma	R252C	OncoKB: Likely Neutral, level NA;CIViC: NA;MyCancerGenome: not present;CancerHotspot: yes;3DHotspot: yes	MutationAssessor: impact: medium, score: 3.205;SIFT: impact: deleterious, score: 0.03;Polyphen-2: impact: possibly_damaging, score: 0.882	Missense_Mutation	SNP	amp	12	.	.	.	7	55221710	55221710	C	T	7:g.55221710C>T	ENST00000275493.2:c.754C>T	0.22		43	150		66	65	2020-07-28
Brain Lower Grade Glioma (TCGA, PanCancer Atlas)	TCGA-E1-A7YJ-01	Astrocytoma	R252C	OncoKB: Likely Neutral, level NA;CIViC: NA;MyCancerGenome: not present;CancerHotspot: yes;3DHotspot: yes	MutationAssessor: impact: medium, score: 3.205;SIFT: impact: deleterious, score: 0.03;Polyphen-2: impact: possibly_damaging, score: 0.882	Missense_Mutation	SNP	amp	12	.	.	.	7	55221710	55221710	C	T	7:g.55221710C>T	ENST00000275493.2:c.754C>T	0.07		231	3225		54	33	2020-07-28
Brain Lower Grade Glioma (TCGA, PanCancer Atlas)	TCGA-TQ-A7RP-01	Oligoastrocytoma	R252C	OncoKB: Likely Neutral, level NA;CIViC: NA;MyCancerGenome: not present;CancerHotspot: yes;3DHotspot: yes	MutationAssessor: impact: medium, score: 3.205;SIFT: impact: deleterious, score: 0.03;Polyphen-2: impact: possibly_damaging, score: 0.882	Missense_Mutation	SNP	gain	12	.	.	.	7	55221710	55221710	C	T	7:g.55221710C>T	ENST00000275493.2:c.754C>T	0.07		5	65		111	39	2020-07-28
Brain Lower Grade Glioma (TCGA, PanCancer Atlas)	TCGA-DU-7006-01	Astrocytoma	R252P	OncoKB: Likely Oncogenic, level NA;CIViC: NA;MyCancerGenome: not present;CancerHotspot: yes;3DHotspot: yes	MutationAssessor: impact: high, score: 3.55;SIFT: impact: tolerated, score: 0.06;Polyphen-2: impact: possibly_damaging, score: 0.868	Missense_Mutation	SNP	gain	12	.	.	.	7	55221711	55221711	G	C	7:g.55221711G>C	ENST00000275493.2:c.755G>C	0.12		16	119		86	59	2020-07-28
Brain Lower Grade Glioma (TCGA, PanCancer Atlas)	TCGA-DU-7292-01	Astrocytoma	R252P	OncoKB: Likely Oncogenic, level NA;CIViC: NA;MyCancerGenome: not present;CancerHotspot: yes;3DHotspot: yes	MutationAssessor: impact: high, score: 3.55;SIFT: impact: tolerated, score: 0.06;Polyphen-2: impact: possibly_damaging, score: 0.868	Missense_Mutation	SNP	amp	12	.	.	.	7	55221711	55221711	G	C	7:g.55221711G>C	ENST00000275493.2:c.755G>C	0.79		943	253		110	40	2020-07-28
Brain Lower Grade Glioma (TCGA, PanCancer Atlas)	TCGA-HT-A61C-01	Oligodendroglioma	T263P	OncoKB: Oncogenic, level_4;CIViC: Predictive: 1;MyCancerGenome: not present;CancerHotspot: yes;3DHotspot: yes	MutationAssessor: impact: medium, score: 2.32;SIFT: impact: tolerated, score: 0.19;Polyphen-2: impact: benign, score: 0.236	Missense_Mutation	SNP	gain	7	.	.	.	7	55221743	55221743	A	C	7:g.55221743A>C	ENST00000275493.2:c.787A>C	0.24		39	125		165	38	2020-07-28		376208	rs1057519829
Brain Lower Grade Glioma (TCGA, PanCancer Atlas)	TCGA-DU-7012-01	Astrocytoma	D256G	OncoKB: Likely Oncogenic, level NA;CIViC: NA;MyCancerGenome: not present;CancerHotspot: no;3DHotspot: yes	MutationAssessor: impact: medium, score: 3.215;SIFT: impact: deleterious, score: 0.02;Polyphen-2: impact: probably_damaging, score: 0.995	Missense_Mutation	SNP	gain	5	.	.	.	7	55221723	55221723	A	G	7:g.55221723A>G	ENST00000275493.2:c.767A>G	0.39		42	67		86	48	2020-07-28
Brain Lower Grade Glioma (TCGA, PanCancer Atlas)	TCGA-DU-8158-01	Astrocytoma	E84V	OncoKB: Predicted Oncogenic, level NA;CIViC: NA;MyCancerGenome: not present;CancerHotspot: no;3DHotspot: yes	MutationAssessor: impact: medium, score: 2.62;SIFT: impact: deleterious, score: 0;Polyphen-2: impact: probably_damaging, score: 1	Missense_Mutation	SNP	diploid	1	.	.	.	7	55211008	55211008	A	T	7:g.55211008A>T	ENST00000275493.2:c.251A>T	0.26		28	81		118	40	2020-03-28
Brain Lower Grade Glioma (TCGA, PanCancer Atlas)	TCGA-KT-A7W1-01	Astrocytoma	E709K	OncoKB: Oncogenic, level NA;CIViC: NA;MyCancerGenome: not present;CancerHotspot: yes;3DHotspot: no	MutationAssessor: impact: medium, score: 2.53;SIFT: impact: deleterious, score: 0.01;Polyphen-2: impact: possibly_damaging, score: 0.618	Missense_Mutation	SNP	amp	48	.	.	.	7	55241677	55241677	G	A	7:g.55241677G>A	ENST00000275493.2:c.2125G>A	0.2		553	2184		90	39	18/28	7.95267e-06	177646	rs727504256
Brain Lower Grade Glioma (TCGA, PanCancer Atlas)	TCGA-KT-A7W1-01	Astrocytoma	G719D	OncoKB: Likely Oncogenic, level_3b;CIViC: Predictive: 1;MyCancerGenome: present;CancerHotspot: yes;3DHotspot: no	MutationAssessor: impact: high, score: 3.54;SIFT: impact: deleterious, score: 0;Polyphen-2: impact: probably_damaging, score: 1	Missense_Mutation	SNP	amp	125	.	.	.	7	55241708	55241708	G	A	7:g.55241708G>A	ENST00000275493.2:c.2156G>A	0.18		390	1724		73	39	18/28		376075	rs121913428
Brain Lower Grade Glioma (TCGA, PanCancer Atlas)	TCGA-HT-8104-01	Astrocytoma	G724S	OncoKB: Oncogenic, level NA;CIViC: Predictive: 1;MyCancerGenome: not present;CancerHotspot: no;3DHotspot: no	MutationAssessor: impact: medium, score: 2.245;SIFT: impact: deleterious, score: 0.03;Polyphen-2: impact: probably_damaging, score: 1	Missense_Mutation	SNP	amp	7	.	.	.	7	55241722	55241722	G	A	7:g.55241722G>A	ENST00000275493.2:c.2170G>A	0.06	0.01	126	1946	1	95	55	18/28	3.18492e-05	376360	rs1051753269
Brain Lower Grade Glioma (TCGA, PanCancer Atlas)	TCGA-FG-A87Q-01	Astrocytoma	T263I	OncoKB: Likely Oncogenic, level NA;CIViC: NA;MyCancerGenome: not present;CancerHotspot: yes;3DHotspot: yes	MutationAssessor: impact: medium, score: 2.865;SIFT: impact: tolerated, score: 0.13;Polyphen-2: impact: benign, score: 0.151	Missense_Mutation	SNP	amp	7	.	.	.	7	55221744	55221744	C	T	7:g.55221744C>T	ENST00000275493.2:c.788C>T	0.39		255	391		62	54	2020-07-28
Brain Lower Grade Glioma (TCGA, PanCancer Atlas)	TCGA-E1-A7YD-01	Astrocytoma	R324L	OncoKB: Oncogenic, level NA;CIViC: NA;MyCancerGenome: not present;CancerHotspot: no;3DHotspot: no	MutationAssessor: impact: low, score: 1.59;SIFT: impact: deleterious, score: 0.01;Polyphen-2: impact: possibly_damaging, score: 0.552	Missense_Mutation	SNP	amp	4	.	.	.	7	55223604	55223604	G	T	7:g.55223604G>T	ENST00000275493.2:c.971G>T	0.92	0.04	504	42	1	24	51	2020-08-28
Brain Lower Grade Glioma (TCGA, PanCancer Atlas)	TCGA-QH-A6CX-01	Astrocytoma	R324L	OncoKB: Oncogenic, level NA;CIViC: NA;MyCancerGenome: not present;CancerHotspot: no;3DHotspot: no	MutationAssessor: impact: low, score: 1.59;SIFT: impact: deleterious, score: 0.01;Polyphen-2: impact: possibly_damaging, score: 0.552	Missense_Mutation	SNP	amp	4	.	.	.	7	55223604	55223604	G	T	7:g.55223604G>T	ENST00000275493.2:c.971G>T	0.86		213	35		24	33	2020-08-28
Lung Adenocarcinoma (TCGA, PanCancer Atlas)	TCGA-50-6595-01	Lung Adenocarcinoma	G719A	OncoKB: Oncogenic, level_1;CIViC: Predictive: 6;MyCancerGenome: present;CancerHotspot: yes;3DHotspot: no	MutationAssessor: impact: medium, score: 3.045;SIFT: impact: deleterious, score: 0;Polyphen-2: impact: probably_damaging, score: 0.997	Missense_Mutation	SNP	gain	125	.	.	.	7	55241708	55241708	G	C	7:g.55241708G>C	ENST00000275493.2:c.2156G>C	0.29		25	62		72	98	18/28		45225	rs121913428
Lung Adenocarcinoma (TCGA, PanCancer Atlas)	TCGA-55-A48Z-01	Lung Adenocarcinoma	G719A	OncoKB: Oncogenic, level_1;CIViC: Predictive: 6;MyCancerGenome: present;CancerHotspot: yes;3DHotspot: no	MutationAssessor: impact: medium, score: 3.045;SIFT: impact: deleterious, score: 0;Polyphen-2: impact: probably_damaging, score: 0.997	Missense_Mutation	SNP	amp	125	.	.	.	7	55241708	55241708	G	C	7:g.55241708G>C	ENST00000275493.2:c.2156G>C	0.28		35	90		77	44	18/28		45225	rs121913428
Lung Adenocarcinoma (TCGA, PanCancer Atlas)	TCGA-38-4627-01	Lung Adenocarcinoma	L858R	OncoKB: Oncogenic, level_1;CIViC: Predictive: 41, Prognostic: 1;MyCancerGenome: present;CancerHotspot: yes;3DHotspot: yes	MutationAssessor: impact: high, score: 3.65;SIFT: impact: deleterious, score: 0;Polyphen-2: impact: probably_damaging, score: 0.999	Missense_Mutation	SNP	gain	2247	.	.	.	7	55259515	55259515	T	G	7:g.55259515T>G	ENST00000275493.2:c.2573T>G	0.12		15	108		128	30	21/28		16609	rs121434568
Lung Adenocarcinoma (TCGA, PanCancer Atlas)	TCGA-49-4490-01	Lung Adenocarcinoma	L858R	OncoKB: Oncogenic, level_1;CIViC: Predictive: 41, Prognostic: 1;MyCancerGenome: present;CancerHotspot: yes;3DHotspot: yes	MutationAssessor: impact: high, score: 3.65;SIFT: impact: deleterious, score: 0;Polyphen-2: impact: probably_damaging, score: 0.999	Missense_Mutation	SNP	gain	2247	.	.	.	7	55259515	55259515	T	G	7:g.55259515T>G	ENST00000275493.2:c.2573T>G	0.4		45	67		86	47	21/28		16609	rs121434568
Lung Adenocarcinoma (TCGA, PanCancer Atlas)	TCGA-49-4494-01	Lung Adenocarcinoma	L858R	OncoKB: Oncogenic, level_1;CIViC: Predictive: 41, Prognostic: 1;MyCancerGenome: present;CancerHotspot: yes;3DHotspot: yes	MutationAssessor: impact: high, score: 3.65;SIFT: impact: deleterious, score: 0;Polyphen-2: impact: probably_damaging, score: 0.999	Missense_Mutation	SNP	gain	2247	.	.	.	7	55259515	55259515	T	G	7:g.55259515T>G	ENST00000275493.2:c.2573T>G	0.44		94	119		160	171	21/28		16609	rs121434568
Lung Adenocarcinoma (TCGA, PanCancer Atlas)	TCGA-50-5944-01	Lung Adenocarcinoma	L858R	OncoKB: Oncogenic, level_1;CIViC: Predictive: 41, Prognostic: 1;MyCancerGenome: present;CancerHotspot: yes;3DHotspot: yes	MutationAssessor: impact: high, score: 3.65;SIFT: impact: deleterious, score: 0;Polyphen-2: impact: probably_damaging, score: 0.999	Missense_Mutation	SNP	gain	2247	.	.	.	7	55259515	55259515	T	G	7:g.55259515T>G	ENST00000275493.2:c.2573T>G	0.29		24	59		96	55	21/28		16609	rs121434568
Lung Adenocarcinoma (TCGA, PanCancer Atlas)	TCGA-55-8096-01	Lung Adenocarcinoma	L858R	OncoKB: Oncogenic, level_1;CIViC: Predictive: 41, Prognostic: 1;MyCancerGenome: present;CancerHotspot: yes;3DHotspot: yes	MutationAssessor: impact: high, score: 3.65;SIFT: impact: deleterious, score: 0;Polyphen-2: impact: probably_damaging, score: 0.999	Missense_Mutation	SNP	amp	2247	.	.	.	7	55259515	55259515	T	G	7:g.55259515T>G	ENST00000275493.2:c.2573T>G	0.46		192	224		219	132	21/28		16609	rs121434568
Lung Adenocarcinoma (TCGA, PanCancer Atlas)	TCGA-55-8506-01	Lung Adenocarcinoma	L858R	OncoKB: Oncogenic, level_1;CIViC: Predictive: 41, Prognostic: 1;MyCancerGenome: present;CancerHotspot: yes;3DHotspot: yes	MutationAssessor: impact: high, score: 3.65;SIFT: impact: deleterious, score: 0;Polyphen-2: impact: probably_damaging, score: 0.999	Missense_Mutation	SNP	diploid	2247	.	.	.	7	55259515	55259515	T	G	7:g.55259515T>G	ENST00000275493.2:c.2573T>G	0.47		66	74		142	1583	21/28		16609	rs121434568
Lung Adenocarcinoma (TCGA, PanCancer Atlas)	TCGA-62-8394-01	Lung Adenocarcinoma	L858R	OncoKB: Oncogenic, level_1;CIViC: Predictive: 41, Prognostic: 1;MyCancerGenome: present;CancerHotspot: yes;3DHotspot: yes	MutationAssessor: impact: high, score: 3.65;SIFT: impact: deleterious, score: 0;Polyphen-2: impact: probably_damaging, score: 0.999	Missense_Mutation	SNP	gain	2247	.	.	.	7	55259515	55259515	T	G	7:g.55259515T>G	ENST00000275493.2:c.2573T>G	0.42		84	118		165	117	21/28		16609	rs121434568
Lung Adenocarcinoma (TCGA, PanCancer Atlas)	TCGA-64-1681-01	Lung Adenocarcinoma	L858R	OncoKB: Oncogenic, level_1;CIViC: Predictive: 41, Prognostic: 1;MyCancerGenome: present;CancerHotspot: yes;3DHotspot: yes	MutationAssessor: impact: high, score: 3.65;SIFT: impact: deleterious, score: 0;Polyphen-2: impact: probably_damaging, score: 0.999	Missense_Mutation	SNP	gain	2247	.	.	.	7	55259515	55259515	T	G	7:g.55259515T>G	ENST00000275493.2:c.2573T>G	0.32		39	83		108	77	21/28		16609	rs121434568
Lung Adenocarcinoma (TCGA, PanCancer Atlas)	TCGA-67-3770-01	Lung Adenocarcinoma	L858R	OncoKB: Oncogenic, level_1;CIViC: Predictive: 41, Prognostic: 1;MyCancerGenome: present;CancerHotspot: yes;3DHotspot: yes	MutationAssessor: impact: high, score: 3.65;SIFT: impact: deleterious, score: 0;Polyphen-2: impact: probably_damaging, score: 0.999	Missense_Mutation	SNP	gain	2247	.	.	.	7	55259515	55259515	T	G	7:g.55259515T>G	ENST00000275493.2:c.2573T>G	0.25		81	237		176	187	21/28		16609	rs121434568
Lung Adenocarcinoma (TCGA, PanCancer Atlas)	TCGA-67-3772-01	Lung Adenocarcinoma	L858R	OncoKB: Oncogenic, level_1;CIViC: Predictive: 41, Prognostic: 1;MyCancerGenome: present;CancerHotspot: yes;3DHotspot: yes	MutationAssessor: impact: high, score: 3.65;SIFT: impact: deleterious, score: 0;Polyphen-2: impact: probably_damaging, score: 0.999	Missense_Mutation	SNP	gain	2247	.	.	.	7	55259515	55259515	T	G	7:g.55259515T>G	ENST00000275493.2:c.2573T>G	0.26		133	371		480	59	21/28		16609	rs121434568
Lung Adenocarcinoma (TCGA, PanCancer Atlas)	TCGA-67-6217-01	Lung Adenocarcinoma	L858R	OncoKB: Oncogenic, level_1;CIViC: Predictive: 41, Prognostic: 1;MyCancerGenome: present;CancerHotspot: yes;3DHotspot: yes	MutationAssessor: impact: high, score: 3.65;SIFT: impact: deleterious, score: 0;Polyphen-2: impact: probably_damaging, score: 0.999	Missense_Mutation	SNP	gain	2247	.	.	.	7	55259515	55259515	T	G	7:g.55259515T>G	ENST00000275493.2:c.2573T>G	0.15		14	82		96	177	21/28		16609	rs121434568
Lung Adenocarcinoma (TCGA, PanCancer Atlas)	TCGA-71-8520-01	Lung Adenocarcinoma	L858R	OncoKB: Oncogenic, level_1;CIViC: Predictive: 41, Prognostic: 1;MyCancerGenome: present;CancerHotspot: yes;3DHotspot: yes	MutationAssessor: impact: high, score: 3.65;SIFT: impact: deleterious, score: 0;Polyphen-2: impact: probably_damaging, score: 0.999	Missense_Mutation	SNP		2247	.	.	.	7	55259515	55259515	T	G	7:g.55259515T>G	ENST00000275493.2:c.2573T>G	0.53		103	92		109	80	21/28		16609	rs121434568
Lung Adenocarcinoma (TCGA, PanCancer Atlas)	TCGA-86-8055-01	Lung Adenocarcinoma	L858R	OncoKB: Oncogenic, level_1;CIViC: Predictive: 41, Prognostic: 1;MyCancerGenome: present;CancerHotspot: yes;3DHotspot: yes	MutationAssessor: impact: high, score: 3.65;SIFT: impact: deleterious, score: 0;Polyphen-2: impact: probably_damaging, score: 0.999	Missense_Mutation	SNP	amp	2247	.	.	.	7	55259515	55259515	T	G	7:g.55259515T>G	ENST00000275493.2:c.2573T>G	0.7		345	147		195	40	21/28		16609	rs121434568
Lung Adenocarcinoma (TCGA, PanCancer Atlas)	TCGA-86-8075-01	Lung Adenocarcinoma	L858R	OncoKB: Oncogenic, level_1;CIViC: Predictive: 41, Prognostic: 1;MyCancerGenome: present;CancerHotspot: yes;3DHotspot: yes	MutationAssessor: impact: high, score: 3.65;SIFT: impact: deleterious, score: 0;Polyphen-2: impact: probably_damaging, score: 0.999	Missense_Mutation	SNP	gain	2247	.	.	.	7	55259515	55259515	T	G	7:g.55259515T>G	ENST00000275493.2:c.2573T>G	0.43		63	83		254	50	21/28		16609	rs121434568
Lung Adenocarcinoma (TCGA, PanCancer Atlas)	TCGA-86-8668-01	Lung Adenocarcinoma	L858R	OncoKB: Oncogenic, level_1;CIViC: Predictive: 41, Prognostic: 1;MyCancerGenome: present;CancerHotspot: yes;3DHotspot: yes	MutationAssessor: impact: high, score: 3.65;SIFT: impact: deleterious, score: 0;Polyphen-2: impact: probably_damaging, score: 0.999	Missense_Mutation	SNP	gain	2247	.	.	.	7	55259515	55259515	T	G	7:g.55259515T>G	ENST00000275493.2:c.2573T>G	0.15		27	151		160	33	21/28		16609	rs121434568
Lung Adenocarcinoma (TCGA, PanCancer Atlas)	TCGA-91-6835-01	Lung Adenocarcinoma	L858R	OncoKB: Oncogenic, level_1;CIViC: Predictive: 41, Prognostic: 1;MyCancerGenome: present;CancerHotspot: yes;3DHotspot: yes	MutationAssessor: impact: high, score: 3.65;SIFT: impact: deleterious, score: 0;Polyphen-2: impact: probably_damaging, score: 0.999	Missense_Mutation	SNP	gain	2247	.	.	.	7	55259515	55259515	T	G	7:g.55259515T>G	ENST00000275493.2:c.2573T>G	0.1		11	97		104	79	21/28		16609	rs121434568
Lung Adenocarcinoma (TCGA, PanCancer Atlas)	TCGA-97-8177-01	Lung Adenocarcinoma	L858R	OncoKB: Oncogenic, level_1;CIViC: Predictive: 41, Prognostic: 1;MyCancerGenome: present;CancerHotspot: yes;3DHotspot: yes	MutationAssessor: impact: high, score: 3.65;SIFT: impact: deleterious, score: 0;Polyphen-2: impact: probably_damaging, score: 0.999	Missense_Mutation	SNP	gain	2247	.	.	.	7	55259515	55259515	T	G	7:g.55259515T>G	ENST00000275493.2:c.2573T>G	0.19		53	221		92	32	21/28		16609	rs121434568
Lung Adenocarcinoma (TCGA, PanCancer Atlas)	TCGA-97-A4M1-01	Lung Adenocarcinoma	L858R	OncoKB: Oncogenic, level_1;CIViC: Predictive: 41, Prognostic: 1;MyCancerGenome: present;CancerHotspot: yes;3DHotspot: yes	MutationAssessor: impact: high, score: 3.65;SIFT: impact: deleterious, score: 0;Polyphen-2: impact: probably_damaging, score: 0.999	Missense_Mutation	SNP	gain	2247	.	.	.	7	55259515	55259515	T	G	7:g.55259515T>G	ENST00000275493.2:c.2573T>G	0.12		16	122		126	39	21/28		16609	rs121434568
Lung Adenocarcinoma (TCGA, PanCancer Atlas)	TCGA-97-A4M7-01	Lung Adenocarcinoma	L858R	OncoKB: Oncogenic, level_1;CIViC: Predictive: 41, Prognostic: 1;MyCancerGenome: present;CancerHotspot: yes;3DHotspot: yes	MutationAssessor: impact: high, score: 3.65;SIFT: impact: deleterious, score: 0;Polyphen-2: impact: probably_damaging, score: 0.999	Missense_Mutation	SNP	gain	2247	.	.	.	7	55259515	55259515	T	G	7:g.55259515T>G	ENST00000275493.2:c.2573T>G	0.13		18	121		177	278	21/28		16609	rs121434568
Lung Adenocarcinoma (TCGA, PanCancer Atlas)	TCGA-L9-A50W-01	Lung Adenocarcinoma	L858R	OncoKB: Oncogenic, level_1;CIViC: Predictive: 41, Prognostic: 1;MyCancerGenome: present;CancerHotspot: yes;3DHotspot: yes	MutationAssessor: impact: high, score: 3.65;SIFT: impact: deleterious, score: 0;Polyphen-2: impact: probably_damaging, score: 0.999	Missense_Mutation	SNP	gain	2247	.	.	.	7	55259515	55259515	T	G	7:g.55259515T>G	ENST00000275493.2:c.2573T>G	0.39		39	61		56	31	21/28		16609	rs121434568
Lung Adenocarcinoma (TCGA, PanCancer Atlas)	TCGA-MP-A4SW-01	Lung Adenocarcinoma	L858R	OncoKB: Oncogenic, level_1;CIViC: Predictive: 41, Prognostic: 1;MyCancerGenome: present;CancerHotspot: yes;3DHotspot: yes	MutationAssessor: impact: high, score: 3.65;SIFT: impact: deleterious, score: 0;Polyphen-2: impact: probably_damaging, score: 0.999	Missense_Mutation	SNP	amp	2247	.	.	.	7	55259515	55259515	T	G	7:g.55259515T>G	ENST00000275493.2:c.2573T>G	0.57		150	114		128	60	21/28		16609	rs121434568
Lung Adenocarcinoma (TCGA, PanCancer Atlas)	TCGA-MP-A4T9-01	Lung Adenocarcinoma	L858R	OncoKB: Oncogenic, level_1;CIViC: Predictive: 41, Prognostic: 1;MyCancerGenome: present;CancerHotspot: yes;3DHotspot: yes	MutationAssessor: impact: high, score: 3.65;SIFT: impact: deleterious, score: 0;Polyphen-2: impact: probably_damaging, score: 0.999	Missense_Mutation	SNP	amp	2247	.	.	.	7	55259515	55259515	T	G	7:g.55259515T>G	ENST00000275493.2:c.2573T>G	0.28		60	156		112	31	21/28		16609	rs121434568
Lung Adenocarcinoma (TCGA, PanCancer Atlas)	TCGA-17-Z047-01	Lung Adenocarcinoma	L858R	OncoKB: Oncogenic, level_1;CIViC: Predictive: 41, Prognostic: 1;MyCancerGenome: present;CancerHotspot: yes;3DHotspot: yes	MutationAssessor: impact: high, score: 3.65;SIFT: impact: deleterious, score: 0;Polyphen-2: impact: probably_damaging, score: 0.999	Missense_Mutation	SNP		2247	.	.	.	7	55259515	55259515	T	G	7:g.55259515T>G	ENST00000275493.2:c.2573T>G	0.08		27	311		276	28	21/28		16609	rs121434568
Lung Adenocarcinoma (TCGA, PanCancer Atlas)	TCGA-05-5423-01	Lung Adenocarcinoma	L861Q	OncoKB: Oncogenic, level_1;CIViC: Predictive: 5;MyCancerGenome: present;CancerHotspot: yes;3DHotspot: yes	MutationAssessor: impact: neutral, score: 0.62;SIFT: impact: deleterious, score: 0;Polyphen-2: impact: probably_damaging, score: 0.983	Missense_Mutation	SNP	gain	92	.	.	.	7	55259524	55259524	T	A	7:g.55259524T>A	ENST00000275493.2:c.2582T>A	0.22	0.02	17	59	1	62	140	21/28		163380	rs121913444
Lung Adenocarcinoma (TCGA, PanCancer Atlas)	TCGA-78-7147-01	Lung Adenocarcinoma	L861Q	OncoKB: Oncogenic, level_1;CIViC: Predictive: 5;MyCancerGenome: present;CancerHotspot: yes;3DHotspot: yes	MutationAssessor: impact: neutral, score: 0.62;SIFT: impact: deleterious, score: 0;Polyphen-2: impact: probably_damaging, score: 0.983	Missense_Mutation	SNP	gain	92	.	.	.	7	55259524	55259524	T	A	7:g.55259524T>A	ENST00000275493.2:c.2582T>A	0.6		98	65		90	306	21/28		163380	rs121913444
Lung Adenocarcinoma (TCGA, PanCancer Atlas)	TCGA-93-A4JP-01	Lung Adenocarcinoma	L861Q	OncoKB: Oncogenic, level_1;CIViC: Predictive: 5;MyCancerGenome: present;CancerHotspot: yes;3DHotspot: yes	MutationAssessor: impact: neutral, score: 0.62;SIFT: impact: deleterious, score: 0;Polyphen-2: impact: probably_damaging, score: 0.983	Missense_Mutation	SNP	gain	92	.	.	.	7	55259524	55259524	T	A	7:g.55259524T>A	ENST00000275493.2:c.2582T>A	0.1		13	119		192	54	21/28		163380	rs121913444
Lung Adenocarcinoma (TCGA, PanCancer Atlas)	TCGA-50-6591-01	Lung Adenocarcinoma	L833V	OncoKB: Oncogenic, level NA;CIViC: NA;MyCancerGenome: not present;CancerHotspot: yes;3DHotspot: yes	MutationAssessor: impact: neutral, score: -0.28;SIFT: impact: deleterious, score: 0;Polyphen-2: impact: possibly_damaging, score: 0.782	Missense_Mutation	SNP	amp	25	.	.	.	7	55259439	55259439	T	G	7:g.55259439T>G	ENST00000275493.2:c.2497T>G	0.92		323	27		108	55	21/28		45277	rs397517126
Lung Adenocarcinoma (TCGA, PanCancer Atlas)	TCGA-44-A4SU-01	Lung Adenocarcinoma	S768I	OncoKB: Oncogenic, level_1;CIViC: Predictive: 10;MyCancerGenome: not present;CancerHotspot: yes;3DHotspot: no	MutationAssessor: impact: low, score: 1.885;SIFT: impact: deleterious, score: 0;Polyphen-2: impact: probably_damaging, score: 0.999	Missense_Mutation	SNP	amp	40	.	.	.	7	55249005	55249005	G	T	7:g.55249005G>T	ENST00000275493.2:c.2303G>T	0.56		131	101		155	133	20/28		45251	rs121913465
Lung Adenocarcinoma (TCGA, PanCancer Atlas)	TCGA-50-6595-01	Lung Adenocarcinoma	S768I	OncoKB: Oncogenic, level_1;CIViC: Predictive: 10;MyCancerGenome: not present;CancerHotspot: yes;3DHotspot: no	MutationAssessor: impact: low, score: 1.885;SIFT: impact: deleterious, score: 0;Polyphen-2: impact: probably_damaging, score: 0.999	Missense_Mutation	SNP	gain	40	.	.	.	7	55249005	55249005	G	T	7:g.55249005G>T	ENST00000275493.2:c.2303G>T	0.25		38	114		99	98	20/28		45251	rs121913465
Lung Adenocarcinoma (TCGA, PanCancer Atlas)	TCGA-38-4627-01	Lung Adenocarcinoma	L62R	OncoKB: Likely Oncogenic, level NA;CIViC: NA;MyCancerGenome: not present;CancerHotspot: yes;3DHotspot: no	MutationAssessor: impact: medium, score: 2.985;SIFT: impact: deleterious, score: 0.01;Polyphen-2: impact: possibly_damaging, score: 0.488	Missense_Mutation	SNP	gain	8	.	.	.	7	55210075	55210075	T	G	7:g.55210075T>G	ENST00000275493.2:c.185T>G	0.15		35	199		212	30	2020-02-28
Lung Adenocarcinoma (TCGA, PanCancer Atlas)	TCGA-71-8520-01	Lung Adenocarcinoma	L62R	OncoKB: Likely Oncogenic, level NA;CIViC: NA;MyCancerGenome: not present;CancerHotspot: yes;3DHotspot: no	MutationAssessor: impact: medium, score: 2.985;SIFT: impact: deleterious, score: 0.01;Polyphen-2: impact: possibly_damaging, score: 0.488	Missense_Mutation	SNP		8	.	.	.	7	55210075	55210075	T	G	7:g.55210075T>G	ENST00000275493.2:c.185T>G	0.5		90	91		101	80	2020-02-28
Lung Adenocarcinoma (TCGA, PanCancer Atlas)	TCGA-49-4494-01	Lung Adenocarcinoma	T790M	OncoKB: Oncogenic, level_1;CIViC: Predictive: 38, Prognostic: 2;MyCancerGenome: present;CancerHotspot: yes;3DHotspot: no	MutationAssessor: impact: neutral, score: -0.025;SIFT: impact: deleterious, score: 0;Polyphen-2: impact: probably_damaging, score: 1	Missense_Mutation	SNP	gain	355	.	.	.	7	55249071	55249071	C	T	7:g.55249071C>T	ENST00000275493.2:c.2369C>T	0.51		96	91		142	171	20/28	3.97671e-05	16613	rs121434569
Lung Adenocarcinoma (TCGA, PanCancer Atlas)	TCGA-L9-A50W-01	Lung Adenocarcinoma	T790M	OncoKB: Oncogenic, level_1;CIViC: Predictive: 38, Prognostic: 2;MyCancerGenome: present;CancerHotspot: yes;3DHotspot: no	MutationAssessor: impact: neutral, score: -0.025;SIFT: impact: deleterious, score: 0;Polyphen-2: impact: probably_damaging, score: 1	Missense_Mutation	SNP	gain	355	.	.	.	7	55249071	55249071	C	T	7:g.55249071C>T	ENST00000275493.2:c.2369C>T	0.55		55	45		55	31	20/28	3.97671e-05	16613	rs121434569
Lung Adenocarcinoma (TCGA, PanCancer Atlas)	TCGA-05-4382-01	Lung Adenocarcinoma	R222L	OncoKB: Likely Oncogenic, level NA;CIViC: NA;MyCancerGenome: not present;CancerHotspot: yes;3DHotspot: no	MutationAssessor: impact: medium, score: 3.395;SIFT: impact: deleterious, score: 0;Polyphen-2: impact: probably_damaging, score: 1	Missense_Mutation	SNP	gain	8	.	.	.	7	55220275	55220275	G	T	7:g.55220275G>T	ENST00000275493.2:c.665G>T	0.17	0.0083	86	418	1	119	1547	2020-06-28
Lung Adenocarcinoma (TCGA, PanCancer Atlas)	TCGA-05-5423-01	Lung Adenocarcinoma	L833F	OncoKB: Likely Oncogenic, level NA;CIViC: NA;MyCancerGenome: not present;CancerHotspot: yes;3DHotspot: yes	MutationAssessor: impact: neutral, score: -0.435;SIFT: impact: deleterious, score: 0;Polyphen-2: impact: probably_damaging, score: 0.997	Missense_Mutation	SNP	gain	25	.	.	.	7	55259441	55259441	G	T	7:g.55259441G>T	ENST00000275493.2:c.2499G>T	0.24		16	52		66	140	21/28
Lung Adenocarcinoma (TCGA, PanCancer Atlas)	TCGA-55-7573-01	Lung Adenocarcinoma	K754E	OncoKB: Likely Oncogenic, level NA;CIViC: NA;MyCancerGenome: not present;CancerHotspot: yes;3DHotspot: yes	MutationAssessor: impact: neutral, score: -0.44;SIFT: impact: deleterious, score: 0.02;Polyphen-2: impact: possibly_damaging, score: 0.709	Missense_Mutation	SNP	diploid	7	.	.	.	7	55242490	55242490	A	G	7:g.55242490A>G	ENST00000275493.2:c.2260A>G	0.2		9	36		58	50	19/28		45241	rs397517101
Lung Adenocarcinoma (TCGA, PanCancer Atlas)	TCGA-78-7155-01	Lung Adenocarcinoma	K754I	OncoKB: Likely Oncogenic, level NA;CIViC: NA;MyCancerGenome: not present;CancerHotspot: yes;3DHotspot: yes	MutationAssessor: impact: neutral, score: 0.54;SIFT: impact: deleterious, score: 0;Polyphen-2: impact: probably_damaging, score: 0.974	Missense_Mutation	SNP	amp	7	.	.	.	7	55242491	55242491	A	T	7:g.55242491A>T	ENST00000275493.2:c.2261A>T	0.43		37	50		57	1406	19/28
Lung Adenocarcinoma (TCGA, PanCancer Atlas)	TCGA-44-A4SU-01	Lung Adenocarcinoma	G719C	OncoKB: Oncogenic, level_1;CIViC: NA;MyCancerGenome: present;CancerHotspot: yes;3DHotspot: no	MutationAssessor: impact: high, score: 3.995;SIFT: impact: deleterious, score: 0;Polyphen-2: impact: probably_damaging, score: 1	Missense_Mutation	SNP	amp	125	.	.	.	7	55241707	55241707	G	T	7:g.55241707G>T	ENST00000275493.2:c.2155G>T	0.57		66	50		70	133	18/28		16611	rs28929495
Lung Squamous Cell Carcinoma (TCGA, PanCancer Atlas)	TCGA-66-2742-01	Lung Squamous Cell Carcinoma	L861Q	OncoKB: Oncogenic, level_1;CIViC: Predictive: 5;MyCancerGenome: present;CancerHotspot: yes;3DHotspot: yes	MutationAssessor: impact: neutral, score: 0.62;SIFT: impact: deleterious, score: 0;Polyphen-2: impact: probably_damaging, score: 0.983	Missense_Mutation	SNP	gain	92	.	.	.	7	55259524	55259524	T	A	7:g.55259524T>A	ENST00000275493.2:c.2582T>A	0.28	0.0071	51	131	1	139	214	21/28		163380	rs121913444
Lung Squamous Cell Carcinoma (TCGA, PanCancer Atlas)	TCGA-70-6722-01	Lung Squamous Cell Carcinoma	L861Q	OncoKB: Oncogenic, level_1;CIViC: Predictive: 5;MyCancerGenome: present;CancerHotspot: yes;3DHotspot: yes	MutationAssessor: impact: neutral, score: 0.62;SIFT: impact: deleterious, score: 0;Polyphen-2: impact: probably_damaging, score: 0.983	Missense_Mutation	SNP	amp	92	.	.	.	7	55259524	55259524	T	A	7:g.55259524T>A	ENST00000275493.2:c.2582T>A	0.63		185	110		114	278	21/28		163380	rs121913444
Lung Squamous Cell Carcinoma (TCGA, PanCancer Atlas)	TCGA-22-4609-01	Lung Squamous Cell Carcinoma	S229C	OncoKB: Oncogenic, level NA;CIViC: NA;MyCancerGenome: not present;CancerHotspot: no;3DHotspot: no	MutationAssessor: impact: medium, score: 2.765;SIFT: impact: deleterious, score: 0;Polyphen-2: impact: probably_damaging, score: 0.931	Missense_Mutation	SNP	diploid	1	.	.	.	7	55220295	55220295	A	T	7:g.55220295A>T	ENST00000275493.2:c.685A>T	0.38	0.002	71	115	1	499	176	2020-06-28
Lung Squamous Cell Carcinoma (TCGA, PanCancer Atlas)	TCGA-46-3769-01	Lung Squamous Cell Carcinoma	P589L	OncoKB: Likely Oncogenic, level NA;CIViC: NA;MyCancerGenome: not present;CancerHotspot: no;3DHotspot: no	MutationAssessor: impact: medium, score: 2.095;SIFT: impact: tolerated, score: 0.13;Polyphen-2: impact: possibly_damaging, score: 0.488	Missense_Mutation	SNP	amp	2	.	.	.	7	55233016	55233016	C	T	7:g.55233016C>T	ENST00000275493.2:c.1766C>T	0.08		21	242		50	812	15/28			rs751570775
Lung Squamous Cell Carcinoma (TCGA, PanCancer Atlas)	TCGA-70-6722-01	Lung Squamous Cell Carcinoma	V843L	OncoKB: Likely Oncogenic, level NA;CIViC: NA;MyCancerGenome: not present;CancerHotspot: no;3DHotspot: no	MutationAssessor: impact: low, score: 1.63;SIFT: impact: deleterious, score: 0;Polyphen-2: impact: probably_damaging, score: 0.981	Missense_Mutation	SNP	amp	7	.	.	.	7	55259469	55259469	G	T	7:g.55259469G>T	ENST00000275493.2:c.2527G>T	0.69		209	95		123	278	21/28
Ovarian Serous Cystadenocarcinoma (TCGA, PanCancer Atlas)	TCGA-13-0912-01	Serous Ovarian Cancer	E114K	OncoKB: Likely Oncogenic, level NA;CIViC: NA;MyCancerGenome: not present;CancerHotspot: no;3DHotspot: no	MutationAssessor: impact: medium, score: 2.2;SIFT: impact: deleterious, score: 0.04;Polyphen-2: impact: benign, score: 0.012	Missense_Mutation	SNP	gain	4	.	.	.	7	55211097	55211097	G	A	7:g.55211097G>A	ENST00000275493.2:c.340G>A	0.06		30	481		554	39	2020-03-28			rs1219568637
Ovarian Serous Cystadenocarcinoma (TCGA, PanCancer Atlas)	TCGA-24-1850-01	Serous Ovarian Cancer	K261N	OncoKB: Predicted Oncogenic, level NA;CIViC: NA;MyCancerGenome: not present;CancerHotspot: no;3DHotspot: yes	MutationAssessor: impact: medium, score: 3.115;SIFT: impact: tolerated, score: 0.12;Polyphen-2: impact: probably_damaging, score: 0.984	Missense_Mutation	SNP	gain	1	.	.	.	7	55221739	55221739	G	T	7:g.55221739G>T	ENST00000275493.2:c.783G>T	0.09		7	68		86	90	2020-07-28
Skin Cutaneous Melanoma (TCGA, PanCancer Atlas)	TCGA-EE-A17X-06	Cutaneous Melanoma	E114K	OncoKB: Likely Oncogenic, level NA;CIViC: NA;MyCancerGenome: not present;CancerHotspot: no;3DHotspot: no	MutationAssessor: impact: medium, score: 2.2;SIFT: impact: deleterious, score: 0.04;Polyphen-2: impact: benign, score: 0.012	Missense_Mutation	SNP	diploid	4	.	.	.	7	55211097	55211097	G	A	7:g.55211097G>A	ENST00000275493.2:c.340G>A	0.34		27	53		95	680	2020-03-28			rs1219568637
Skin Cutaneous Melanoma (TCGA, PanCancer Atlas)	TCGA-GF-A6C9-06	Cutaneous Melanoma	P753S	OncoKB: Predicted Oncogenic, level NA;CIViC: Predictive: 1;MyCancerGenome: not present;CancerHotspot: no;3DHotspot: yes	MutationAssessor: impact: neutral, score: 0.715;SIFT: impact: deleterious, score: 0.04;Polyphen-2: impact: possibly_damaging, score: 0.824	Missense_Mutation	SNP	gain	6	.	.	.	7	55242487	55242487	C	T	7:g.55242487C>T	ENST00000275493.2:c.2257C>T	0.16		11	57		80	2314	19/28	7.95254e-06	376081	rs121913231
Skin Cutaneous Melanoma (TCGA, PanCancer Atlas)	TCGA-EE-A29S-06	Cutaneous Melanoma	G983R	OncoKB: Oncogenic, level NA;CIViC: NA;MyCancerGenome: not present;CancerHotspot: no;3DHotspot: no	MutationAssessor: impact: medium, score: 2.89;SIFT: impact: deleterious, score: 0.05;Polyphen-2: impact: benign, score: 0.375	Missense_Mutation	SNP	diploid	2	.	.	.	7	55268881	55268881	G	A	7:g.55268881G>A	ENST00000275493.2:c.2947G>A	0.34		42	80		62	1005	25/28
Skin Cutaneous Melanoma (TCGA, PanCancer Atlas)	TCGA-EE-A29D-06	Cutaneous Melanoma	P589L	OncoKB: Likely Oncogenic, level NA;CIViC: NA;MyCancerGenome: not present;CancerHotspot: no;3DHotspot: no	MutationAssessor: impact: medium, score: 2.095;SIFT: impact: tolerated, score: 0.13;Polyphen-2: impact: possibly_damaging, score: 0.488	Missense_Mutation	SNP	amp	2	.	.	.	7	55233016	55233016	C	T	7:g.55233016C>T	ENST00000275493.2:c.1766C>T	0.39		41	65		75	3093	15/28			rs751570775
Stomach Adenocarcinoma (TCGA, PanCancer Atlas)	TCGA-BR-8680-01	Tubular Stomach Adenocarcinoma	R252H	OncoKB: Likely Oncogenic, level NA;CIViC: NA;MyCancerGenome: not present;CancerHotspot: yes;3DHotspot: yes	MutationAssessor: impact: medium, score: 2.31;SIFT: impact: tolerated, score: 0.12;Polyphen-2: impact: benign, score: 0.022	Missense_Mutation	SNP	diploid	12	.	.	.	7	55221711	55221711	G	A	7:g.55221711G>A	ENST00000275493.2:c.755G>A	0.32		38	81		147	5414	2020-07-28	4.37445e-05		rs760101437
Stomach Adenocarcinoma (TCGA, PanCancer Atlas)	TCGA-FP-A4BE-01	Stomach Adenocarcinoma	R252H	OncoKB: Likely Oncogenic, level NA;CIViC: NA;MyCancerGenome: not present;CancerHotspot: yes;3DHotspot: yes	MutationAssessor: impact: medium, score: 2.31;SIFT: impact: tolerated, score: 0.12;Polyphen-2: impact: benign, score: 0.022	Missense_Mutation	SNP		12	.	.	.	7	55221711	55221711	G	A	7:g.55221711G>A	ENST00000275493.2:c.755G>A	0.36		42	75		168	1336	2020-07-28	4.37445e-05		rs760101437
Stomach Adenocarcinoma (TCGA, PanCancer Atlas)	TCGA-D7-6521-01	Diffuse Type Stomach Adenocarcinoma	V85M	OncoKB: Predicted Oncogenic, level NA;CIViC: NA;MyCancerGenome: not present;CancerHotspot: no;3DHotspot: yes	MutationAssessor: impact: high, score: 4.13;SIFT: impact: deleterious, score: 0;Polyphen-2: impact: probably_damaging, score: 1	Missense_Mutation	SNP	gain	1	.	.	.	7	55211010	55211010	G	A	7:g.55211010G>A	ENST00000275493.2:c.253G>A	0.07		9	126		107	71	2020-03-28
Stomach Adenocarcinoma (TCGA, PanCancer Atlas)	TCGA-FP-7829-01	Mucinous Stomach Adenocarcinoma	R324H	OncoKB: Likely Oncogenic, level NA;CIViC: NA;MyCancerGenome: not present;CancerHotspot: no;3DHotspot: no	MutationAssessor: impact: medium, score: 2.39;SIFT: impact: tolerated, score: 0.06;Polyphen-2: impact: benign, score: 0.129	Missense_Mutation	SNP	gain	4	.	.	.	7	55223604	55223604	G	A	7:g.55223604G>A	ENST00000275493.2:c.971G>A	0.46		18	21		31	216	2020-08-28	7.97092e-06		rs758748662
Stomach Adenocarcinoma (TCGA, PanCancer Atlas)	TCGA-BR-4184-01	Stomach Adenocarcinoma	M178I	OncoKB: Likely Oncogenic, level NA;CIViC: NA;MyCancerGenome: not present;CancerHotspot: no;3DHotspot: no	MutationAssessor: impact: neutral, score: -0.755;SIFT: impact: tolerated, score: 0.45;Polyphen-2: impact: benign, score: 0	Missense_Mutation	SNP	gain	1	.	.	.	7	55214408	55214408	G	T	7:g.55214408G>T	ENST00000275493.2:c.534G>T	0.11		5	42		50	3126	2020-04-28
Stomach Adenocarcinoma (TCGA, PanCancer Atlas)	TCGA-VQ-A8P5-01	Intestinal Type Stomach Adenocarcinoma	A864V	OncoKB: Likely Oncogenic, level NA;CIViC: NA;MyCancerGenome: not present;CancerHotspot: no;3DHotspot: no	MutationAssessor: impact: low, score: 0.915;SIFT: impact: tolerated, score: 0.25;Polyphen-2: impact: benign, score: 0.062	Missense_Mutation	SNP	diploid	7	.	.	.	7	55259533	55259533	C	T	7:g.55259533C>T	ENST00000275493.2:c.2591C>T	0.12	0.01	7	52	1	80	194	21/28
Uterine Corpus Endometrial Carcinoma (TCGA, PanCancer Atlas)	TCGA-D1-A174-01	Uterine Endometrioid Carcinoma	V742I	OncoKB: Likely Oncogenic, level NA;CIViC: NA;MyCancerGenome: not present;CancerHotspot: no;3DHotspot: no	MutationAssessor: impact: medium, score: 2.43;SIFT: impact: deleterious, score: 0;Polyphen-2: impact: probably_damaging, score: 0.991	Missense_Mutation	SNP	diploid	6	.	.	.	7	55242454	55242454	G	A	7:g.55242454G>A	ENST00000275493.2:c.2224G>A	0.29		42	101		133	802	19/28	2.38582e-05	134026	rs587778250
Uterine Corpus Endometrial Carcinoma (TCGA, PanCancer Atlas)	TCGA-AP-A051-01	Uterine Endometrioid Carcinoma	V148M	OncoKB: Likely Oncogenic, level NA;CIViC: NA;MyCancerGenome: not present;CancerHotspot: no;3DHotspot: no	MutationAssessor: impact: medium, score: 2.65;SIFT: impact: deleterious, score: 0;Polyphen-2: impact: probably_damaging, score: 0.998	Missense_Mutation	SNP	diploid	1	.	.	.	7	55214316	55214316	G	A	7:g.55214316G>A	ENST00000275493.2:c.442G>A	0.23		7	24		81	8312	2020-04-28			rs1562756942
Uterine Corpus Endometrial Carcinoma (TCGA, PanCancer Atlas)	TCGA-AX-A0J0-01	Uterine Endometrioid Carcinoma	R832C	OncoKB: Predicted Oncogenic, level NA;CIViC: NA;MyCancerGenome: not present;CancerHotspot: no;3DHotspot: yes	MutationAssessor: impact: low, score: 1.08;SIFT: impact: deleterious, score: 0;Polyphen-2: impact: possibly_damaging, score: 0.891	Missense_Mutation	SNP	diploid	4	.	.	.	7	55259436	55259436	C	T	7:g.55259436C>T	ENST00000275493.2:c.2494C>T	0.67		18	9		155	7790	21/28	3.98162e-06		rs745812480
Uterine Corpus Endometrial Carcinoma (TCGA, PanCancer Atlas)	TCGA-BS-A0UF-01	Uterine Endometrioid Carcinoma	A864V	OncoKB: Likely Oncogenic, level NA;CIViC: NA;MyCancerGenome: not present;CancerHotspot: no;3DHotspot: no	MutationAssessor: impact: low, score: 0.915;SIFT: impact: tolerated, score: 0.25;Polyphen-2: impact: benign, score: 0.062	Missense_Mutation	SNP	diploid	7	.	.	.	7	55259533	55259533	C	T	7:g.55259533C>T	ENST00000275493.2:c.2591C>T	0.11		4	32		37	8376	21/28
Uterine Corpus Endometrial Carcinoma (TCGA, PanCancer Atlas)	TCGA-A5-A1OF-01	Uterine Mixed Endometrial Carcinoma	R831C	OncoKB: Predicted Oncogenic, level NA;CIViC: NA;MyCancerGenome: not present;CancerHotspot: no;3DHotspot: yes	MutationAssessor: impact: low, score: 1.77;SIFT: impact: deleterious, score: 0.01;Polyphen-2: impact: probably_damaging, score: 0.987	Missense_Mutation	SNP	diploid	6	.	.	.	7	55259433	55259433	C	T	7:g.55259433C>T	ENST00000275493.2:c.2491C>T	0.3		12	28		55	10493	21/28	8.76222e-05	45276	rs371228501
Adrenocortical Carcinoma (TCGA, PanCancer Atlas)	TCGA-OR-A5KZ-01	Adrenocortical Carcinoma	V159M	OncoKB: Unknown, level NA;CIViC: NA;MyCancerGenome: not present;CancerHotspot: no;3DHotspot: no	MutationAssessor: impact: low, score: 1.15;SIFT: impact: tolerated, score: 0.21;Polyphen-2: impact: benign, score: 0.007	Missense_Mutation	SNP	gain		.	.	.	7	55214349	55214349	G	A	7:g.55214349G>A	ENST00000275493.2:c.475G>A	0.07		13	180		103	28	2020-04-28
Adrenocortical Carcinoma (TCGA, PanCancer Atlas)	TCGA-OR-A5K0-01	Adrenocortical Carcinoma	R377K	OncoKB: Unknown, level NA;CIViC: NA;MyCancerGenome: not present;CancerHotspot: no;3DHotspot: no	MutationAssessor: impact: neutral, score: -0.11;SIFT: impact: tolerated, score: 1;Polyphen-2: impact: benign, score: 0	Missense_Mutation	SNP	diploid	1	.	.	.	7	55224349	55224349	G	A	7:g.55224349G>A	ENST00000275493.2:c.1130G>A	0.57		62	47		104	51	2020-09-28
Bladder Urothelial Carcinoma (TCGA, PanCancer Atlas)	TCGA-DK-A3WW-01	Bladder Urothelial Carcinoma	E1079K	OncoKB: Unknown, level NA;CIViC: NA;MyCancerGenome: not present;CancerHotspot: no;3DHotspot: no	MutationAssessor: impact: medium, score: 2.63;SIFT: impact: tolerated, score: 0.22;Polyphen-2: impact: benign, score: 0.046	Missense_Mutation	SNP	diploid	1	.	.	.	7	55270282	55270282	G	A	7:g.55270282G>A	ENST00000275493.2:c.3235G>A	0.3		8	19		29	1083	27/28
Bladder Urothelial Carcinoma (TCGA, PanCancer Atlas)	TCGA-E5-A2PC-01	Bladder Urothelial Carcinoma	T384S	OncoKB: Unknown, level NA;CIViC: NA;MyCancerGenome: not present;CancerHotspot: no;3DHotspot: no	MutationAssessor: impact: medium, score: 2.17;SIFT: impact: tolerated, score: 0.1;Polyphen-2: impact: benign, score: 0.085	Missense_Mutation	SNP	gain	1	.	.	.	7	55224469	55224469	C	G	7:g.55224469C>G	ENST00000275493.2:c.1151C>G	0.17		19	94		74	206	2020-10-28
Bladder Urothelial Carcinoma (TCGA, PanCancer Atlas)	TCGA-DK-AA6L-01	Bladder Urothelial Carcinoma	E711K	OncoKB: Unknown, level NA;CIViC: NA;MyCancerGenome: not present;CancerHotspot: no;3DHotspot: no	MutationAssessor: impact: medium, score: 2.905;SIFT: impact: deleterious, score: 0;Polyphen-2: impact: possibly_damaging, score: 0.482	Missense_Mutation	SNP	gain	3	.	.	.	7	55241683	55241683	G	A	7:g.55241683G>A	ENST00000275493.2:c.2131G>A	0.23		23	79		84	384	18/28
Bladder Urothelial Carcinoma (TCGA, PanCancer Atlas)	TCGA-BT-A42E-01	Bladder Urothelial Carcinoma	V121F	OncoKB: Unknown, level NA;CIViC: NA;MyCancerGenome: not present;CancerHotspot: no;3DHotspot: no	MutationAssessor: impact: medium, score: 3.4;SIFT: impact: deleterious, score: 0;Polyphen-2: impact: possibly_damaging, score: 0.879	Missense_Mutation	SNP	gain		.	.	.	7	55211118	55211118	G	T	7:g.55211118G>T	ENST00000275493.2:c.361G>T	0.37		23	39		65	159	2020-03-28
Bladder Urothelial Carcinoma (TCGA, PanCancer Atlas)	TCGA-MV-A51V-01	Bladder Urothelial Carcinoma	Q390R	OncoKB: Unknown, level NA;CIViC: NA;MyCancerGenome: not present;CancerHotspot: no;3DHotspot: no	MutationAssessor: impact: neutral, score: -0.215;SIFT: impact: tolerated, score: 0.09;Polyphen-2: impact: benign, score: 0.001	Missense_Mutation	SNP	gain	1	.	.	.	7	55224487	55224487	A	G	7:g.55224487A>G	ENST00000275493.2:c.1169A>G	0.21		11	41		61	1421	2020-10-28
Bladder Urothelial Carcinoma (TCGA, PanCancer Atlas)	TCGA-DK-AA75-01	Bladder Urothelial Carcinoma	F359L	OncoKB: Unknown, level NA;CIViC: NA;MyCancerGenome: not present;CancerHotspot: no;3DHotspot: no	MutationAssessor: impact: low, score: 1.85;SIFT: impact: deleterious, score: 0;Polyphen-2: impact: probably_damaging, score: 0.979	Missense_Mutation	SNP	gain		.	.	.	7	55224296	55224296	C	A	7:g.55224296C>A	ENST00000275493.2:c.1077C>A	0.18		13	58		74	416	2020-09-28
Breast Invasive Carcinoma (TCGA, PanCancer Atlas)	TCGA-A8-A094-01	Breast Invasive Ductal Carcinoma	E282K	OncoKB: Likely Neutral, level NA;CIViC: NA;MyCancerGenome: not present;CancerHotspot: no;3DHotspot: no	MutationAssessor: impact: low, score: 1.59;SIFT: impact: tolerated, score: 0.34;Polyphen-2: impact: benign, score: 0.011	Missense_Mutation	SNP	gain	1	.	.	.	7	55221800	55221800	G	A	7:g.55221800G>A	ENST00000275493.2:c.844G>A	0.22		12	42		96	170	2020-07-28	0.000345968		rs199796955
Breast Invasive Carcinoma (TCGA, PanCancer Atlas)	TCGA-C8-A1HG-01	Breast Invasive Ductal Carcinoma	T847K	OncoKB: Unknown, level NA;CIViC: NA;MyCancerGenome: not present;CancerHotspot: no;3DHotspot: no	MutationAssessor: impact: neutral, score: -0.23;SIFT: impact: deleterious, score: 0;Polyphen-2: impact: possibly_damaging, score: 0.555	Missense_Mutation	SNP	diploid	7	.	.	.	7	55259482	55259482	C	A	7:g.55259482C>A	ENST00000275493.2:c.2540C>A	0.1		11	103		117	41	21/28
Breast Invasive Carcinoma (TCGA, PanCancer Atlas)	TCGA-A2-A4S3-01	Breast Invasive Ductal Carcinoma	D314G	OncoKB: Unknown, level NA;CIViC: NA;MyCancerGenome: not present;CancerHotspot: no;3DHotspot: no	MutationAssessor: impact: neutral, score: -0.37;SIFT: impact: tolerated, score: 0.26;Polyphen-2: impact: benign, score: 0.031	Missense_Mutation	SNP	diploid	2	.	.	.	7	55223574	55223574	A	G	7:g.55223574A>G	ENST00000275493.2:c.941A>G	0.29		26	65		75	55	2020-08-28
Breast Invasive Carcinoma (TCGA, PanCancer Atlas)	TCGA-AC-A23H-01	Breast Invasive Ductal Carcinoma	D1051N	OncoKB: Unknown, level NA;CIViC: NA;MyCancerGenome: not present;CancerHotspot: no;3DHotspot: no	MutationAssessor: impact: low, score: 1.175;SIFT: impact: tolerated, score: 0.6;Polyphen-2: impact: benign, score: 0.001	Missense_Mutation	SNP	shallowdel	1	.	.	.	7	55269464	55269464	G	A	7:g.55269464G>A	ENST00000275493.2:c.3151G>A	0.24		21	65		100	4260	26/28
Breast Invasive Carcinoma (TCGA, PanCancer Atlas)	TCGA-BH-A18U-01	Breast Invasive Ductal Carcinoma	E257K	OncoKB: Unknown, level NA;CIViC: NA;MyCancerGenome: not present;CancerHotspot: no;3DHotspot: no	MutationAssessor: impact: low, score: 1.81;SIFT: impact: deleterious, score: 0.01;Polyphen-2: impact: benign, score: 0.206	Missense_Mutation	SNP	amp		.	.	.	7	55221725	55221725	G	A	7:g.55221725G>A	ENST00000275493.2:c.769G>A	0.04		27	612		297	124	2020-07-28	0.000155097		rs138847501
Breast Invasive Carcinoma (TCGA, PanCancer Atlas)	TCGA-AO-A12G-01	Breast Invasive Carcinoma (NOS)	T273A	OncoKB: Unknown, level NA;CIViC: NA;MyCancerGenome: not present;CancerHotspot: no;3DHotspot: no	MutationAssessor: impact: low, score: 1.28;SIFT: impact: tolerated, score: 0.43;Polyphen-2: impact: benign, score: 0.006	Missense_Mutation	SNP	diploid	2	.	.	.	7	55221773	55221773	A	G	7:g.55221773A>G	ENST00000275493.2:c.817A>G	0.32		19	40		44	34	2020-07-28
Breast Invasive Carcinoma (TCGA, PanCancer Atlas)	TCGA-B6-A0RQ-01	Breast Invasive Lobular Carcinoma	A1201V	OncoKB: Unknown, level NA;CIViC: NA;MyCancerGenome: not present;CancerHotspot: no;3DHotspot: no	MutationAssessor: impact: medium, score: 2.015;SIFT: impact: deleterious, score: 0.01;Polyphen-2: impact: benign, score: 0.284	Missense_Mutation	SNP	diploid		.	.	.	7	55273279	55273279	C	T	7:g.55273279C>T	ENST00000275493.2:c.3602C>T	0.07		5	69		75	41	28/28	3.97722e-06		rs201717672
Breast Invasive Carcinoma (TCGA, PanCancer Atlas)	TCGA-AR-A0TV-01	Breast Invasive Ductal Carcinoma	C526S	OncoKB: Unknown, level NA;CIViC: NA;MyCancerGenome: not present;CancerHotspot: no;3DHotspot: no	MutationAssessor: impact: high, score: 4.115;SIFT: impact: deleterious, score: 0;Polyphen-2: impact: probably_damaging, score: 0.986	Missense_Mutation	SNP	diploid	1	.	.	.	7	55229270	55229270	G	C	7:g.55229270G>C	ENST00000275493.2:c.1577G>C	0.26		21	60		74	58	13/28
Breast Invasive Carcinoma (TCGA, PanCancer Atlas)	TCGA-A7-A6VX-01	Breast Invasive Ductal Carcinoma	A147T	OncoKB: Unknown, level NA;CIViC: NA;MyCancerGenome: not present;CancerHotspot: no;3DHotspot: no	MutationAssessor: impact: low, score: 1.625;SIFT: impact: deleterious, score: 0.02;Polyphen-2: impact: benign, score: 0.027	Missense_Mutation	SNP	diploid		.	.	.	7	55214313	55214313	G	A	7:g.55214313G>A	ENST00000275493.2:c.439G>A	0.35		18	33		29	117	2020-04-28	7.95456e-06		rs532655845
Breast Invasive Carcinoma (TCGA, PanCancer Atlas)	TCGA-OL-A5RZ-01	Breast Invasive Ductal Carcinoma	E97Q	OncoKB: Unknown, level NA;CIViC: NA;MyCancerGenome: not present;CancerHotspot: no;3DHotspot: no	MutationAssessor: impact: low, score: 1.32;SIFT: impact: tolerated, score: 0.19;Polyphen-2: impact: benign, score: 0.026	Missense_Mutation	SNP	gain		.	.	.	7	55211046	55211046	G	C	7:g.55211046G>C	ENST00000275493.2:c.289G>C	0.06		4	60		66	97	2020-03-28	3.9763e-06		rs755189573
Breast Invasive Carcinoma (TCGA, PanCancer Atlas)	TCGA-S3-A6ZG-01	Breast Invasive Carcinoma (NOS)	E928V	OncoKB: Unknown, level NA;CIViC: NA;MyCancerGenome: not present;CancerHotspot: no;3DHotspot: no	MutationAssessor: impact: low, score: 1.505;SIFT: impact: deleterious, score: 0;Polyphen-2: impact: probably_damaging, score: 1	Missense_Mutation	SNP	shallowdel		.	.	.	7	55266491	55266491	A	T	7:g.55266491A>T	ENST00000275493.2:c.2783A>T	0.28		7	18		42	39	23/28
Cervical Squamous Cell Carcinoma (TCGA, PanCancer Atlas)	TCGA-IR-A3LA-01	Endometrioid Carcinoma	V550L	OncoKB: Unknown, level NA;CIViC: NA;MyCancerGenome: not present;CancerHotspot: no;3DHotspot: no	MutationAssessor: impact: low, score: 1.06;SIFT: impact: tolerated, score: 0.25;Polyphen-2: impact: benign, score: 0.001	Missense_Mutation	SNP	diploid		.	.	.	7	55231442	55231442	G	C	7:g.55231442G>C	ENST00000275493.2:c.1648G>C	0.24		5	16		38	961	14/28
Cervical Squamous Cell Carcinoma (TCGA, PanCancer Atlas)	TCGA-C5-A1BM-01	Cervical Squamous Cell Carcinoma	I789M	OncoKB: Unknown, level NA;CIViC: NA;MyCancerGenome: not present;CancerHotspot: no;3DHotspot: no	MutationAssessor: impact: medium, score: 2.045;SIFT: impact: deleterious, score: 0;Polyphen-2: impact: possibly_damaging, score: 0.875	Missense_Mutation	SNP	diploid		.	.	.	7	55249069	55249069	C	G	7:g.55249069C>G	ENST00000275493.2:c.2367C>G	0.25		24	71		143	124	20/28			rs1562790728
Cervical Squamous Cell Carcinoma (TCGA, PanCancer Atlas)	TCGA-C5-A1BM-01	Cervical Squamous Cell Carcinoma	S811C	OncoKB: Unknown, level NA;CIViC: NA;MyCancerGenome: not present;CancerHotspot: no;3DHotspot: no	MutationAssessor: impact: low, score: 1.92;SIFT: impact: deleterious, score: 0.04;Polyphen-2: impact: probably_damaging, score: 1	Missense_Mutation	SNP	diploid	1	.	.	.	7	55249134	55249134	C	G	7:g.55249134C>G	ENST00000275493.2:c.2432C>G	0.22		16	57		96	124	20/28	3.97643e-06		rs1378775962
Cervical Squamous Cell Carcinoma (TCGA, PanCancer Atlas)	TCGA-C5-A2M2-01	Endocervical Adenocarcinoma	V1097I	OncoKB: Unknown, level NA;CIViC: NA;MyCancerGenome: not present;CancerHotspot: no;3DHotspot: no	MutationAssessor: impact: low, score: 1.515;SIFT: impact: tolerated, score: 0.26;Polyphen-2: impact: benign, score: 0	Missense_Mutation	SNP	diploid	1	.	.	.	7	55272966	55272966	G	A	7:g.55272966G>A	ENST00000275493.2:c.3289G>A	0.4		8	12		30	56	28/28	2.0112e-05		rs775345513
Cervical Squamous Cell Carcinoma (TCGA, PanCancer Atlas)	TCGA-2W-A8YY-01	Cervical Squamous Cell Carcinoma	L90I	OncoKB: Unknown, level NA;CIViC: NA;MyCancerGenome: not present;CancerHotspot: no;3DHotspot: no	MutationAssessor: impact: medium, score: 2.73;SIFT: impact: deleterious, score: 0;Polyphen-2: impact: probably_damaging, score: 1	Missense_Mutation	SNP	diploid		.	.	.	7	55211025	55211025	C	A	7:g.55211025C>A	ENST00000275493.2:c.268C>A	0.38		23	38		67	11307	2020-03-28
Cervical Squamous Cell Carcinoma (TCGA, PanCancer Atlas)	TCGA-2W-A8YY-01	Cervical Squamous Cell Carcinoma	C329Y	OncoKB: Unknown, level NA;CIViC: NA;MyCancerGenome: not present;CancerHotspot: no;3DHotspot: no	MutationAssessor: impact: high, score: 3.945;SIFT: impact: deleterious, score: 0;Polyphen-2: impact: probably_damaging, score: 1	Missense_Mutation	SNP	diploid		.	.	.	7	55223619	55223619	G	A	7:g.55223619G>A	ENST00000275493.2:c.986G>A	0.47		16	18		76	11307	2020-08-28
Cervical Squamous Cell Carcinoma (TCGA, PanCancer Atlas)	TCGA-VS-A9UA-01	Cervical Squamous Cell Carcinoma	M176I	OncoKB: Unknown, level NA;CIViC: NA;MyCancerGenome: not present;CancerHotspot: no;3DHotspot: no	MutationAssessor: impact: neutral, score: 0.205;SIFT: impact: tolerated, score: 0.36;Polyphen-2: impact: benign, score: 0	Missense_Mutation	SNP	diploid		.	.	.	7	55214402	55214402	G	C	7:g.55214402G>C	ENST00000275493.2:c.528G>C	0.13		4	27		24	162	2020-04-28
Colorectal Adenocarcinoma (TCGA, PanCancer Atlas)	TCGA-AG-A002-01	Rectal Adenocarcinoma	R98Q	OncoKB: Likely Neutral, level NA;CIViC: NA;MyCancerGenome: not present;CancerHotspot: no;3DHotspot: no	MutationAssessor: impact: low, score: 1.005;SIFT: impact: tolerated, score: 0.32;Polyphen-2: impact: benign, score: 0.007	Missense_Mutation	SNP	diploid		.	.	.	7	55211050	55211050	G	A	7:g.55211050G>A	ENST00000275493.2:c.293G>A	0.49		52	55		105	11431	2020-03-28	0.000115315		rs17289589
Colorectal Adenocarcinoma (TCGA, PanCancer Atlas)	TCGA-AA-3966-01	Mucinous Adenocarcinoma of the Colon and Rectum	R831H	OncoKB: Likely Neutral, level NA;CIViC: Predictive: 4;MyCancerGenome: not present;CancerHotspot: no;3DHotspot: yes	MutationAssessor: impact: low, score: 1.175;SIFT: impact: tolerated, score: 0.14;Polyphen-2: impact: benign, score: 0.152	Missense_Mutation	SNP	gain	6	.	.	.	7	55259434	55259434	G	A	7:g.55259434G>A	ENST00000275493.2:c.2492G>A	0.48		84	91		96	1092	21/28	5.17689e-05	560007	rs150036236
Colorectal Adenocarcinoma (TCGA, PanCancer Atlas)	TCGA-AA-3982-01	Colon Adenocarcinoma	D303H	OncoKB: Unknown, level NA;CIViC: NA;MyCancerGenome: not present;CancerHotspot: no;3DHotspot: no	MutationAssessor: impact: medium, score: 2.22;SIFT: impact: deleterious, score: 0;Polyphen-2: impact: benign, score: 0.153	Missense_Mutation	SNP	gain	2	.	.	.	7	55223540	55223540	G	C	7:g.55223540G>C	ENST00000275493.2:c.907G>C	0.13		9	60		72	127	2020-08-28
Colorectal Adenocarcinoma (TCGA, PanCancer Atlas)	TCGA-AA-A00N-01	Mucinous Adenocarcinoma of the Colon and Rectum	R309Q	OncoKB: Unknown, level NA;CIViC: NA;MyCancerGenome: not present;CancerHotspot: no;3DHotspot: no	MutationAssessor: impact: low, score: 1.695;SIFT: impact: tolerated, score: 0.09;Polyphen-2: impact: probably_damaging, score: 0.967	Missense_Mutation	SNP	diploid	1	.	.	.	7	55223559	55223559	G	A	7:g.55223559G>A	ENST00000275493.2:c.926G>A	0.18		24	108		98	4869	2020-08-28
Colorectal Adenocarcinoma (TCGA, PanCancer Atlas)	TCGA-AA-A01R-01	Mucinous Adenocarcinoma of the Colon and Rectum	D314N	OncoKB: Unknown, level NA;CIViC: NA;MyCancerGenome: not present;CancerHotspot: no;3DHotspot: no	MutationAssessor: impact: low, score: 0.905;SIFT: impact: tolerated, score: 1;Polyphen-2: impact: benign, score: 0.015	Missense_Mutation	SNP	diploid	2	.	.	.	7	55223573	55223573	G	A	7:g.55223573G>A	ENST00000275493.2:c.940G>A	0.28		28	73		114	1621	2020-08-28			rs552062864
Colorectal Adenocarcinoma (TCGA, PanCancer Atlas)	TCGA-AD-6964-01	Colon Adenocarcinoma	V1097I	OncoKB: Unknown, level NA;CIViC: NA;MyCancerGenome: not present;CancerHotspot: no;3DHotspot: no	MutationAssessor: impact: low, score: 1.515;SIFT: impact: tolerated, score: 0.26;Polyphen-2: impact: benign, score: 0	Missense_Mutation	SNP	diploid	1	.	.	.	7	55272966	55272966	G	A	7:g.55272966G>A	ENST00000275493.2:c.3289G>A	0.21		8	30		53	1409	28/28	2.0112e-05		rs775345513
Colorectal Adenocarcinoma (TCGA, PanCancer Atlas)	TCGA-A6-3809-01	Mucinous Adenocarcinoma of the Colon and Rectum	D1152N	OncoKB: Unknown, level NA;CIViC: NA;MyCancerGenome: not present;CancerHotspot: no;3DHotspot: no	MutationAssessor: impact: low, score: 1.855;SIFT: impact: tolerated, score: 0.15;Polyphen-2: impact: benign, score: 0	Missense_Mutation	SNP	diploid	1	.	.	.	7	55273131	55273131	G	A	7:g.55273131G>A	ENST00000275493.2:c.3454G>A	0.34		41	78		125	1166	28/28	3.98473e-06		rs368892932
Colorectal Adenocarcinoma (TCGA, PanCancer Atlas)	TCGA-D5-6928-01	Mucinous Adenocarcinoma of the Colon and Rectum	S1096F	OncoKB: Unknown, level NA;CIViC: NA;MyCancerGenome: not present;CancerHotspot: no;3DHotspot: no	MutationAssessor: impact: neutral, score: 0.6;SIFT: impact: tolerated, score: 0.18;Polyphen-2: impact: benign, score: 0	Missense_Mutation	SNP	diploid	1	.	.	.	7	55272964	55272964	C	T	7:g.55272964C>T	ENST00000275493.2:c.3287C>T	0.22		9	32		19	1602	28/28
Colorectal Adenocarcinoma (TCGA, PanCancer Atlas)	TCGA-A6-3809-01	Mucinous Adenocarcinoma of the Colon and Rectum	A1000V	OncoKB: Unknown, level NA;CIViC: NA;MyCancerGenome: not present;CancerHotspot: no;3DHotspot: no	MutationAssessor: impact: medium, score: 2.38;SIFT: impact: deleterious, score: 0.04;Polyphen-2: impact: benign, score: 0.011	Missense_Mutation	SNP	diploid		.	.	.	7	55268933	55268933	C	T	7:g.55268933C>T	ENST00000275493.2:c.2999C>T	0.08		8	91		136	1166	25/28
Colorectal Adenocarcinoma (TCGA, PanCancer Atlas)	TCGA-AD-6964-01	Colon Adenocarcinoma	T1032S	OncoKB: Unknown, level NA;CIViC: NA;MyCancerGenome: not present;CancerHotspot: no;3DHotspot: no	MutationAssessor: impact: medium, score: 2.065;SIFT: impact: tolerated, score: 0.44;Polyphen-2: impact: benign, score: 0.297	Missense_Mutation	SNP	diploid	1	.	.	.	7	55269028	55269028	A	T	7:g.55269028A>T	ENST00000275493.2:c.3094A>T	0.11		6	51		102	1409	25/28
Colorectal Adenocarcinoma (TCGA, PanCancer Atlas)	TCGA-AM-5821-01	Colon Adenocarcinoma	A375V	OncoKB: Unknown, level NA;CIViC: NA;MyCancerGenome: not present;CancerHotspot: no;3DHotspot: no	MutationAssessor: impact: low, score: 1.445;SIFT: impact: deleterious, score: 0.04;Polyphen-2: impact: possibly_damaging, score: 0.494	Missense_Mutation	SNP	diploid		.	.	.	7	55224343	55224343	C	T	7:g.55224343C>T	ENST00000275493.2:c.1124C>T	0.33		42	87		178	1205	2020-09-28
Colorectal Adenocarcinoma (TCGA, PanCancer Atlas)	TCGA-CA-5254-01	Colon Adenocarcinoma	D1006N	OncoKB: Unknown, level NA;CIViC: NA;MyCancerGenome: not present;CancerHotspot: no;3DHotspot: no	MutationAssessor: impact: medium, score: 2.645;SIFT: impact: tolerated, score: 0.12;Polyphen-2: impact: benign, score: 0.072	Missense_Mutation	SNP	diploid		.	.	.	7	55268950	55268950	G	A	7:g.55268950G>A	ENST00000275493.2:c.3016G>A	0.13		5	33		83	181	25/28
Esophageal Adenocarcinoma (TCGA, PanCancer Atlas)	TCGA-L5-A8NM-01	Esophageal Adenocarcinoma	P373S	OncoKB: Unknown, level NA;CIViC: NA;MyCancerGenome: not present;CancerHotspot: no;3DHotspot: no	MutationAssessor: impact: neutral, score: 0.43;SIFT: impact: tolerated, score: 0.75;Polyphen-2: impact: benign, score: 0.079	Missense_Mutation	SNP	diploid		.	.	.	7	55224336	55224336	C	T	7:g.55224336C>T	ENST00000275493.2:c.1117C>T	0.29		16	39		43	1432	2020-09-28
Esophageal Adenocarcinoma (TCGA, PanCancer Atlas)	TCGA-LN-A49W-01	Esophageal Squamous Cell Carcinoma	L1139F	OncoKB: Unknown, level NA;CIViC: NA;MyCancerGenome: not present;CancerHotspot: no;3DHotspot: no	MutationAssessor: impact: medium, score: 3.005;SIFT: impact: deleterious, score: 0;Polyphen-2: impact: possibly_damaging, score: 0.901	Missense_Mutation	SNP	amp		.	.	.	7	55273092	55273092	C	T	7:g.55273092C>T	ENST00000275493.2:c.3415C>T	0.26		7	20		24	75	28/28	3.98302e-06		rs1473630143
Esophageal Adenocarcinoma (TCGA, PanCancer Atlas)	TCGA-JY-A93C-01	Esophageal Adenocarcinoma	D314N	OncoKB: Unknown, level NA;CIViC: NA;MyCancerGenome: not present;CancerHotspot: no;3DHotspot: no	MutationAssessor: impact: low, score: 0.905;SIFT: impact: tolerated, score: 1;Polyphen-2: impact: benign, score: 0.015	Missense_Mutation	SNP	gain	2	.	.	.	7	55223573	55223573	G	A	7:g.55223573G>A	ENST00000275493.2:c.940G>A	0.42		20	28		72	85	2020-08-28			rs552062864
Esophageal Adenocarcinoma (TCGA, PanCancer Atlas)	TCGA-L5-A43J-01	Esophageal Squamous Cell Carcinoma	R574W	OncoKB: Unknown, level NA;CIViC: NA;MyCancerGenome: not present;CancerHotspot: no;3DHotspot: no	MutationAssessor: impact: medium, score: 2.55;SIFT: impact: deleterious, score: 0;Polyphen-2: impact: possibly_damaging, score: 0.741	Missense_Mutation	SNP	gain	1	.	.	.	7	55231514	55231514	C	T	7:g.55231514C>T	ENST00000275493.2:c.1720C>T	0.32		7	15		11	699	14/28	1.59262e-05		rs760471492
Glioblastoma Multiforme (TCGA, PanCancer Atlas)	TCGA-06-0185-01	Glioblastoma Multiforme	V651M	OncoKB: Unknown, level NA;CIViC: NA;MyCancerGenome: not present;CancerHotspot: no;3DHotspot: no	MutationAssessor: impact: medium, score: 2.67;SIFT: impact: deleterious, score: 0.01;Polyphen-2: impact: possibly_damaging, score: 0.542	Missense_Mutation	SNP	amp	3	.	.	.	7	55240707	55240707	G	A	7:g.55240707G>A	ENST00000275493.2:c.1951G>A	0.24		921	2976		174	57	17/28		584693	rs1562783502
Glioblastoma Multiforme (TCGA, PanCancer Atlas)	TCGA-06-A6S1-01	Glioblastoma Multiforme	V774M	OncoKB: Unknown, level NA;CIViC: Predictive: 1;MyCancerGenome: not present;CancerHotspot: no;3DHotspot: no	MutationAssessor: impact: medium, score: 2.935;SIFT: impact: deleterious, score: 0;Polyphen-2: impact: probably_damaging, score: 0.996	Missense_Mutation	SNP	gain	8	.	.	.	7	55249022	55249022	G	A	7:g.55249022G>A	ENST00000275493.2:c.2320G>A	0.08		64	758		120	45	20/28	3.97943e-06		rs567477136
Glioblastoma Multiforme (TCGA, PanCancer Atlas)	TCGA-12-1600-01	Glioblastoma Multiforme	V774M	OncoKB: Unknown, level NA;CIViC: Predictive: 1;MyCancerGenome: not present;CancerHotspot: no;3DHotspot: no	MutationAssessor: impact: medium, score: 2.935;SIFT: impact: deleterious, score: 0;Polyphen-2: impact: probably_damaging, score: 0.996	Missense_Mutation	SNP	amp	8	.	.	.	7	55249022	55249022	G	A	7:g.55249022G>A	ENST00000275493.2:c.2320G>A	0.49	0.01	843	890	1	84	60	20/28	3.97943e-06		rs567477136
Glioblastoma Multiforme (TCGA, PanCancer Atlas)	TCGA-27-1831-01	Glioblastoma Multiforme	V774M	OncoKB: Unknown, level NA;CIViC: Predictive: 1;MyCancerGenome: not present;CancerHotspot: no;3DHotspot: no	MutationAssessor: impact: medium, score: 2.935;SIFT: impact: deleterious, score: 0;Polyphen-2: impact: probably_damaging, score: 0.996	Missense_Mutation	SNP	amp	8	.	.	.	7	55249022	55249022	G	A	7:g.55249022G>A	ENST00000275493.2:c.2320G>A	0.04		256	6470		205	51	20/28	3.97943e-06		rs567477136
Glioblastoma Multiforme (TCGA, PanCancer Atlas)	TCGA-28-1752-01	Glioblastoma Multiforme	V774M	OncoKB: Unknown, level NA;CIViC: Predictive: 1;MyCancerGenome: not present;CancerHotspot: no;3DHotspot: no	MutationAssessor: impact: medium, score: 2.935;SIFT: impact: deleterious, score: 0;Polyphen-2: impact: probably_damaging, score: 0.996	Missense_Mutation	SNP	amp	8	.	.	.	7	55249022	55249022	G	A	7:g.55249022G>A	ENST00000275493.2:c.2320G>A	0.35	0.01	891	1658	1	80	86	20/28	3.97943e-06		rs567477136
Glioblastoma Multiforme (TCGA, PanCancer Atlas)	TCGA-06-0749-01	Glioblastoma Multiforme	V774M	OncoKB: Unknown, level NA;CIViC: Predictive: 1;MyCancerGenome: not present;CancerHotspot: no;3DHotspot: no	MutationAssessor: impact: medium, score: 2.935;SIFT: impact: deleterious, score: 0;Polyphen-2: impact: probably_damaging, score: 0.996	Missense_Mutation	SNP	gain	8	.	.	.	7	55249022	55249022	G	A	7:g.55249022G>A	ENST00000275493.2:c.2320G>A	0.12		33	236		219	47	20/28	3.97943e-06		rs567477136
Glioblastoma Multiforme (TCGA, PanCancer Atlas)	TCGA-06-2561-01	Glioblastoma Multiforme	R149W	OncoKB: Unknown, level NA;CIViC: NA;MyCancerGenome: not present;CancerHotspot: no;3DHotspot: no	MutationAssessor: impact: medium, score: 2.985;SIFT: impact: tolerated, score: 0.13;Polyphen-2: impact: benign, score: 0.022	Missense_Mutation	SNP	gain	1	.	.	.	7	55214319	55214319	C	T	7:g.55214319C>T	ENST00000275493.2:c.445C>T	0.1		9	85		66	37	2020-04-28	7.95425e-06		rs774146556
Glioblastoma Multiforme (TCGA, PanCancer Atlas)	TCGA-14-1034-02	Glioblastoma Multiforme	G63R	OncoKB: Unknown, level NA;CIViC: NA;MyCancerGenome: not present;CancerHotspot: no;3DHotspot: no	MutationAssessor: impact: high, score: 3.615;SIFT: impact: deleterious, score: 0;Polyphen-2: impact: probably_damaging, score: 0.999	Missense_Mutation	SNP		5	.	.	.	7	55210077	55210077	G	A	7:g.55210077G>A	ENST00000275493.2:c.187G>A	0.29		45	112		219	79	2020-02-28
Glioblastoma Multiforme (TCGA, PanCancer Atlas)	TCGA-14-1034-01	Glioblastoma Multiforme	G63R	OncoKB: Unknown, level NA;CIViC: NA;MyCancerGenome: not present;CancerHotspot: no;3DHotspot: no	MutationAssessor: impact: high, score: 3.615;SIFT: impact: deleterious, score: 0;Polyphen-2: impact: probably_damaging, score: 0.999	Missense_Mutation	SNP	gain	5	.	.	.	7	55210077	55210077	G	A	7:g.55210077G>A	ENST00000275493.2:c.187G>A	0.17		49	234		217	73	2020-02-28
Glioblastoma Multiforme (TCGA, PanCancer Atlas)	TCGA-19-2624-01	Glioblastoma Multiforme	G63R	OncoKB: Unknown, level NA;CIViC: NA;MyCancerGenome: not present;CancerHotspot: no;3DHotspot: no	MutationAssessor: impact: high, score: 3.615;SIFT: impact: deleterious, score: 0;Polyphen-2: impact: probably_damaging, score: 0.999	Missense_Mutation	SNP	amp	5	.	.	.	7	55210077	55210077	G	A	7:g.55210077G>A	ENST00000275493.2:c.187G>A	0.04		164	3726		201	39	2020-02-28
Glioblastoma Multiforme (TCGA, PanCancer Atlas)	TCGA-15-0742-01	Glioblastoma Multiforme	C636Y	OncoKB: Unknown, level NA;CIViC: NA;MyCancerGenome: not present;CancerHotspot: no;3DHotspot: no	MutationAssessor: impact: high, score: 4.245;SIFT: impact: deleterious, score: 0.01;Polyphen-2: impact: probably_damaging, score: 0.997	Missense_Mutation	SNP	amp	2	.	.	.	7	55238894	55238894	G	A	7:g.55238894G>A	ENST00000275493.2:c.1907G>A	0.95		2588	129		101	68	16/28
Glioblastoma Multiforme (TCGA, PanCancer Atlas)	TCGA-26-5139-01	Glioblastoma Multiforme	C628F	OncoKB: Unknown, level NA;CIViC: NA;MyCancerGenome: not present;CancerHotspot: no;3DHotspot: no	MutationAssessor: impact: high, score: 4.395;SIFT: impact: deleterious, score: 0;Polyphen-2: impact: possibly_damaging, score: 0.907	Missense_Mutation	SNP	amp	3	.	.	.	7	55238870	55238870	G	T	7:g.55238870G>T	ENST00000275493.2:c.1883G>T	0.82		1863	403		148	44	16/28
Glioblastoma Multiforme (TCGA, PanCancer Atlas)	TCGA-76-6282-01	Glioblastoma Multiforme	C571S	OncoKB: Unknown, level NA;CIViC: NA;MyCancerGenome: not present;CancerHotspot: no;3DHotspot: no	MutationAssessor: impact: high, score: 4.005;SIFT: impact: deleterious, score: 0;Polyphen-2: impact: probably_damaging, score: 1	Missense_Mutation	SNP	amp	1	.	.	.	7	55231506	55231506	G	C	7:g.55231506G>C	ENST00000275493.2:c.1712G>C	0.74		1336	463		117	44	14/28
Glioblastoma Multiforme (TCGA, PanCancer Atlas)	TCGA-76-6656-01	Glioblastoma Multiforme	C240Y	OncoKB: Unknown, level NA;CIViC: NA;MyCancerGenome: not present;CancerHotspot: no;3DHotspot: no	MutationAssessor: impact: high, score: 4.08;SIFT: impact: deleterious, score: 0;Polyphen-2: impact: probably_damaging, score: 1	Missense_Mutation	SNP	amp	1	.	.	.	7	55220329	55220329	G	A	7:g.55220329G>A	ENST00000275493.2:c.719G>A	0.19		621	2722		112	76	2020-06-28
Glioblastoma Multiforme (TCGA, PanCancer Atlas)	TCGA-76-6661-01	Glioblastoma Multiforme	G312W	OncoKB: Unknown, level NA;CIViC: NA;MyCancerGenome: not present;CancerHotspot: no;3DHotspot: no	MutationAssessor: impact: low, score: 1.32;SIFT: impact: deleterious, score: 0;Polyphen-2: impact: possibly_damaging, score: 0.764	Missense_Mutation	SNP	amp	1	.	.	.	7	55223567	55223567	G	T	7:g.55223567G>T	ENST00000275493.2:c.934G>T	0.03	0.01	85	2891	1	66	47	2020-08-28
Glioblastoma Multiforme (TCGA, PanCancer Atlas)	TCGA-06-0174-01	Glioblastoma Multiforme	G614D	OncoKB: Unknown, level NA;CIViC: NA;MyCancerGenome: not present;CancerHotspot: no;3DHotspot: no	MutationAssessor: impact: neutral, score: 0;SIFT: impact: tolerated, score: 0.68;Polyphen-2: impact: benign, score: 0	Missense_Mutation	SNP	amp	1	.	.	.	7	55233091	55233091	G	A	7:g.55233091G>A	ENST00000275493.2:c.1841G>A	0.08		27	322		75	64	15/28	3.9788e-06		rs750850720
Glioblastoma Multiforme (TCGA, PanCancer Atlas)	TCGA-06-0649-01	Glioblastoma Multiforme	G331R	OncoKB: Unknown, level NA;CIViC: NA;MyCancerGenome: not present;CancerHotspot: no;3DHotspot: no	MutationAssessor: impact: medium, score: 3.055;SIFT: impact: deleterious, score: 0.02;Polyphen-2: impact: possibly_damaging, score: 0.821	Missense_Mutation	SNP	gain	2	.	.	.	7	55223624	55223624	G	A	7:g.55223624G>A	ENST00000275493.2:c.991G>A	0.12		5	37		33	114	2020-08-28
Glioblastoma Multiforme (TCGA, PanCancer Atlas)	TCGA-14-0789-01	Glioblastoma Multiforme	C628Y	OncoKB: Likely Neutral, level NA;CIViC: NA;MyCancerGenome: not present;CancerHotspot: no;3DHotspot: no	MutationAssessor: impact: high, score: 4.395;SIFT: impact: deleterious, score: 0;Polyphen-2: impact: probably_damaging, score: 0.993	Missense_Mutation	SNP	amp	3	.	.	.	7	55238870	55238870	G	A	7:g.55238870G>A	ENST00000275493.2:c.1883G>A	0.1		89	846		114	58	16/28
Glioblastoma Multiforme (TCGA, PanCancer Atlas)	TCGA-26-5139-01	Glioblastoma Multiforme	C223Y	OncoKB: Unknown, level NA;CIViC: NA;MyCancerGenome: not present;CancerHotspot: no;3DHotspot: no	MutationAssessor: impact: high, score: 3.865;SIFT: impact: deleterious, score: 0;Polyphen-2: impact: probably_damaging, score: 1	Missense_Mutation	SNP	amp	1	.	.	.	7	55220278	55220278	G	A	7:g.55220278G>A	ENST00000275493.2:c.668G>A	0.03		91	3356		281	44	2020-06-28
Glioblastoma Multiforme (TCGA, PanCancer Atlas)	TCGA-06-5416-01	Glioblastoma Multiforme	R677H	OncoKB: Unknown, level NA;CIViC: NA;MyCancerGenome: not present;CancerHotspot: no;3DHotspot: no	MutationAssessor: impact: medium, score: 1.97;SIFT: impact: tolerated, score: 0.11;Polyphen-2: impact: benign, score: 0.382	Missense_Mutation	SNP	diploid	5	.	.	.	7	55240786	55240786	G	A	7:g.55240786G>A	ENST00000275493.2:c.2030G>A	0.4		89	131		136	12178	17/28	3.22575e-05		rs756870976
Glioblastoma Multiforme (TCGA, PanCancer Atlas)	TCGA-19-1789-01	Glioblastoma Multiforme	R334C	OncoKB: Unknown, level NA;CIViC: NA;MyCancerGenome: not present;CancerHotspot: no;3DHotspot: no	MutationAssessor: impact: low, score: 1.65;SIFT: impact: deleterious, score: 0;Polyphen-2: impact: possibly_damaging, score: 0.695	Missense_Mutation	SNP	amp	1	.	.	.	7	55223633	55223633	C	T	7:g.55223633C>T	ENST00000275493.2:c.1000C>T	0.74		479	168		32	59	2020-08-28
Glioblastoma Multiforme (TCGA, PanCancer Atlas)	TCGA-06-5416-01	Glioblastoma Multiforme	R1068Q	OncoKB: Unknown, level NA;CIViC: NA;MyCancerGenome: not present;CancerHotspot: no;3DHotspot: no	MutationAssessor: impact: medium, score: 3.38;SIFT: impact: deleterious, score: 0.03;Polyphen-2: impact: benign, score: 0.241	Missense_Mutation	SNP	diploid		.	.	.	7	55270250	55270250	G	A	7:g.55270250G>A	ENST00000275493.2:c.3203G>A	0.19		14	58		49	12178	27/28	8.01346e-06		rs374501041
Glioblastoma Multiforme (TCGA, PanCancer Atlas)	TCGA-19-2624-01	Glioblastoma Multiforme	G63E	OncoKB: Unknown, level NA;CIViC: NA;MyCancerGenome: not present;CancerHotspot: no;3DHotspot: no	MutationAssessor: impact: low, score: 1.19;SIFT: impact: tolerated, score: 0.28;Polyphen-2: impact: probably_damaging, score: 0.997	Missense_Mutation	SNP	amp	5	.	.	.	7	55210078	55210078	G	A	7:g.55210078G>A	ENST00000275493.2:c.188G>A	0.04		167	3704		198	39	2020-02-28
Glioblastoma Multiforme (TCGA, PanCancer Atlas)	TCGA-32-1979-01	Glioblastoma Multiforme	Y270C	OncoKB: Unknown, level NA;CIViC: NA;MyCancerGenome: not present;CancerHotspot: no;3DHotspot: no	MutationAssessor: impact: high, score: 3.615;SIFT: impact: deleterious, score: 0;Polyphen-2: impact: probably_damaging, score: 1	Missense_Mutation	SNP	amp	1	.	.	.	7	55221765	55221765	A	G	7:g.55221765A>G	ENST00000275493.2:c.809A>G	0.07		133	1827		70	71	2020-07-28
Glioblastoma Multiforme (TCGA, PanCancer Atlas)	TCGA-12-0707-01	Glioblastoma Multiforme	Y270C	OncoKB: Unknown, level NA;CIViC: NA;MyCancerGenome: not present;CancerHotspot: no;3DHotspot: no	MutationAssessor: impact: high, score: 3.615;SIFT: impact: deleterious, score: 0;Polyphen-2: impact: probably_damaging, score: 1	Missense_Mutation	SNP	amp	1	.	.	.	7	55221765	55221765	A	G	7:g.55221765A>G	ENST00000275493.2:c.809A>G	0.06	0.0041	339	5223	1	243	68	2020-07-28
Glioblastoma Multiforme (TCGA, PanCancer Atlas)	TCGA-06-5416-01	Glioblastoma Multiforme	R675W	OncoKB: Unknown, level NA;CIViC: NA;MyCancerGenome: not present;CancerHotspot: no;3DHotspot: no	MutationAssessor: impact: medium, score: 2.885;SIFT: impact: deleterious, score: 0.02;Polyphen-2: impact: probably_damaging, score: 0.999	Missense_Mutation	SNP	diploid		.	.	.	7	55240779	55240779	C	T	7:g.55240779C>T	ENST00000275493.2:c.2023C>T	0.45		99	122		144	12178	17/28
Glioblastoma Multiforme (TCGA, PanCancer Atlas)	TCGA-12-0657-01	Glioblastoma Multiforme	E45K	OncoKB: Unknown, level NA;CIViC: NA;MyCancerGenome: not present;CancerHotspot: no;3DHotspot: no	MutationAssessor: impact: medium, score: 2.44;SIFT: impact: deleterious, score: 0;Polyphen-2: impact: possibly_damaging, score: 0.5	Missense_Mutation	SNP	amp		.	.	.	7	55210023	55210023	G	A	7:g.55210023G>A	ENST00000275493.2:c.133G>A	0.02		108	4537		495	56	2020-02-28
Glioblastoma Multiforme (TCGA, PanCancer Atlas)	TCGA-12-0657-01	Glioblastoma Multiforme	S1036R	OncoKB: Unknown, level NA;CIViC: NA;MyCancerGenome: not present;CancerHotspot: no;3DHotspot: no	MutationAssessor: impact: medium, score: 3.06;SIFT: impact: tolerated, score: 0.21;Polyphen-2: impact: benign, score: 0.1	Missense_Mutation	SNP	amp		.	.	.	7	55269042	55269042	C	G	7:g.55269042C>G	ENST00000275493.2:c.3108C>G	0.02		79	3308		718	56	25/28
Glioblastoma Multiforme (TCGA, PanCancer Atlas)	TCGA-14-0866-01	Glioblastoma Multiforme	S380F	OncoKB: Unknown, level NA;CIViC: NA;MyCancerGenome: not present;CancerHotspot: no;3DHotspot: no	MutationAssessor: impact: medium, score: 2.35;SIFT: impact: deleterious, score: 0;Polyphen-2: impact: benign, score: 0.063	Missense_Mutation	SNP	amp		.	.	.	7	55224457	55224457	C	T	7:g.55224457C>T	ENST00000275493.2:c.1139C>T	0.1		853	7678		195	383	2020-10-28
Glioblastoma Multiforme (TCGA, PanCancer Atlas)	TCGA-14-1827-01	Glioblastoma Multiforme	S123F	OncoKB: Unknown, level NA;CIViC: NA;MyCancerGenome: not present;CancerHotspot: no;3DHotspot: no	MutationAssessor: impact: medium, score: 2.52;SIFT: impact: tolerated, score: 0.25;Polyphen-2: impact: possibly_damaging, score: 0.64	Missense_Mutation	SNP	amp		.	.	.	7	55211125	55211125	C	T	7:g.55211125C>T	ENST00000275493.2:c.368C>T	0.97		3409	93		67	43	2020-03-28			rs1229095978
Glioblastoma Multiforme (TCGA, PanCancer Atlas)	TCGA-19-1388-01	Glioblastoma Multiforme	W608C	OncoKB: Unknown, level NA;CIViC: NA;MyCancerGenome: not present;CancerHotspot: no;3DHotspot: no	MutationAssessor: impact: low, score: 1.62;SIFT: impact: deleterious, score: 0;Polyphen-2: impact: possibly_damaging, score: 0.661	Missense_Mutation	SNP	amp		.	.	.	7	55233074	55233074	G	C	7:g.55233074G>C	ENST00000275493.2:c.1824G>C	0.27		366	969		45	141	15/28
Glioblastoma Multiforme (TCGA, PanCancer Atlas)	TCGA-19-2621-01	Glioblastoma Multiforme	C624F	OncoKB: Unknown, level NA;CIViC: NA;MyCancerGenome: not present;CancerHotspot: no;3DHotspot: no	MutationAssessor: impact: high, score: 4.575;SIFT: impact: deleterious, score: 0;Polyphen-2: impact: probably_damaging, score: 1	Missense_Mutation	SNP	amp	1	.	.	.	7	55233121	55233121	G	T	7:g.55233121G>T	ENST00000275493.2:c.1871G>T	0.95		999	53		57	134	15/28			rs28384376
Glioblastoma Multiforme (TCGA, PanCancer Atlas)	TCGA-19-5956-01	Glioblastoma Multiforme	P154H	OncoKB: Unknown, level NA;CIViC: NA;MyCancerGenome: not present;CancerHotspot: no;3DHotspot: no	MutationAssessor: impact: medium, score: 2.63;SIFT: impact: deleterious, score: 0.02;Polyphen-2: impact: probably_damaging, score: 0.988	Missense_Mutation	SNP	diploid		.	.	.	7	55214335	55214335	C	A	7:g.55214335C>A	ENST00000275493.2:c.461C>A	0.2		11	44		57	6908	2020-04-28
Head and Neck Squamous Cell Carcinoma (TCGA, PanCancer Atlas)	TCGA-CN-4742-01	Head and Neck Squamous Cell Carcinoma	I475V	OncoKB: Unknown, level NA;CIViC: NA;MyCancerGenome: not present;CancerHotspot: no;3DHotspot: no	MutationAssessor: impact: low, score: 0.875;SIFT: impact: tolerated, score: 1;Polyphen-2: impact: benign, score: 0.013	Missense_Mutation	SNP	diploid	1	.	.	.	7	55227956	55227956	A	G	7:g.55227956A>G	ENST00000275493.2:c.1423A>G	0.3		21	49		98	65	2020-12-28			rs1221992080
Head and Neck Squamous Cell Carcinoma (TCGA, PanCancer Atlas)	TCGA-BA-6872-01	Head and Neck Squamous Cell Carcinoma	D191N	OncoKB: Likely Neutral, level NA;CIViC: NA;MyCancerGenome: not present;CancerHotspot: no;3DHotspot: no	MutationAssessor: impact: medium, score: 1.995;SIFT: impact: tolerated, score: 0.61;Polyphen-2: impact: benign, score: 0	Missense_Mutation	SNP	amp		.	.	.	7	55218998	55218998	G	A	7:g.55218998G>A	ENST00000275493.2:c.571G>A	0.08		65	792		129	159	2020-05-28
Head and Neck Squamous Cell Carcinoma (TCGA, PanCancer Atlas)	TCGA-CV-6961-01	Head and Neck Squamous Cell Carcinoma	P373Q	OncoKB: Likely Neutral, level NA;CIViC: NA;MyCancerGenome: not present;CancerHotspot: no;3DHotspot: no	MutationAssessor: impact: low, score: 0.925;SIFT: impact: tolerated, score: 0.58;Polyphen-2: impact: probably_damaging, score: 0.946	Missense_Mutation	SNP	diploid		.	.	.	7	55224337	55224337	C	A	7:g.55224337C>A	ENST00000275493.2:c.1118C>A	0.19		14	60		95	499	2020-09-28
Head and Neck Squamous Cell Carcinoma (TCGA, PanCancer Atlas)	TCGA-CV-7103-01	Head and Neck Squamous Cell Carcinoma	L38V	OncoKB: Likely Neutral, level NA;CIViC: NA;MyCancerGenome: not present;CancerHotspot: no;3DHotspot: no	MutationAssessor: impact: medium, score: 2.56;SIFT: impact: deleterious, score: 0.01;Polyphen-2: impact: probably_damaging, score: 0.97	Missense_Mutation	SNP	diploid		.	.	.	7	55210002	55210002	C	G	7:g.55210002C>G	ENST00000275493.2:c.112C>G	0.32		33	70		113	74	2020-02-28
Head and Neck Squamous Cell Carcinoma (TCGA, PanCancer Atlas)	TCGA-CV-7427-01	Head and Neck Squamous Cell Carcinoma	F712L	OncoKB: Likely Neutral, level NA;CIViC: NA;MyCancerGenome: not present;CancerHotspot: no;3DHotspot: no	MutationAssessor: impact: low, score: 1.105;SIFT: impact: tolerated, score: 1;Polyphen-2: impact: benign, score: 0.007	Missense_Mutation	SNP	diploid	5	.	.	.	7	55241688	55241688	C	G	7:g.55241688C>G	ENST00000275493.2:c.2136C>G	0.25		16	49		69	396	18/28
Head and Neck Squamous Cell Carcinoma (TCGA, PanCancer Atlas)	TCGA-HD-7832-01	Head and Neck Squamous Cell Carcinoma	E967A	OncoKB: Unknown, level NA;CIViC: NA;MyCancerGenome: not present;CancerHotspot: no;3DHotspot: no	MutationAssessor: impact: low, score: 1.73;SIFT: impact: deleterious, score: 0;Polyphen-2: impact: probably_damaging, score: 0.992	Missense_Mutation	SNP	diploid		.	.	.	7	55268060	55268060	A	C	7:g.55268060A>C	ENST00000275493.2:c.2900A>C	0.37		45	77		174	83	24/28
Head and Neck Squamous Cell Carcinoma (TCGA, PanCancer Atlas)	TCGA-BB-8596-01	Head and Neck Squamous Cell Carcinoma	G503S	OncoKB: Unknown, level NA;CIViC: NA;MyCancerGenome: not present;CancerHotspot: no;3DHotspot: no	MutationAssessor: impact: medium, score: 1.995;SIFT: impact: deleterious, score: 0.03;Polyphen-2: impact: benign, score: 0.392	Missense_Mutation	SNP	gain	1	.	.	.	7	55229200	55229200	G	A	7:g.55229200G>A	ENST00000275493.2:c.1507G>A	0.15		17	95		74	72	13/28	1.99243e-05		rs760711480
Head and Neck Squamous Cell Carcinoma (TCGA, PanCancer Atlas)	TCGA-MT-A67A-01	Head and Neck Squamous Cell Carcinoma	E872G	OncoKB: Unknown, level NA;CIViC: NA;MyCancerGenome: not present;CancerHotspot: no;3DHotspot: no	MutationAssessor: impact: neutral, score: -0.06;SIFT: impact: deleterious, score: 0;Polyphen-2: impact: benign, score: 0.283	Missense_Mutation	SNP	gain	2	.	.	.	7	55259557	55259557	A	G	7:g.55259557A>G	ENST00000275493.2:c.2615A>G	0.31		45	99		132	101	21/28
Head and Neck Squamous Cell Carcinoma (TCGA, PanCancer Atlas)	TCGA-BB-A5HY-01	Head and Neck Squamous Cell Carcinoma	A419P	OncoKB: Unknown, level NA;CIViC: NA;MyCancerGenome: not present;CancerHotspot: no;3DHotspot: no	MutationAssessor: impact: neutral, score: -0.82;SIFT: impact: tolerated, score: 0.18;Polyphen-2: impact: benign, score: 0.018	Missense_Mutation	SNP	amp		.	.	.	7	55225403	55225403	G	C	7:g.55225403G>C	ENST00000275493.2:c.1255G>C	0.04		11	273		72	187	2020-11-28
Kidney Renal Clear Cell Carcinoma (TCGA, PanCancer Atlas)	TCGA-B0-5116-01	Renal Clear Cell Carcinoma	S1042N	OncoKB: Unknown, level NA;CIViC: NA;MyCancerGenome: not present;CancerHotspot: no;3DHotspot: no	MutationAssessor: impact: medium, score: 2.48;SIFT: impact: tolerated, score: 0.08;Polyphen-2: impact: possibly_damaging, score: 0.451	Missense_Mutation	SNP	gain	1	.	.	.	7	55269438	55269438	G	A	7:g.55269438G>A	ENST00000275493.2:c.3125G>A	0.32		63	132		264	57	26/28	3.18573e-05		rs1161802556
Kidney Renal Clear Cell Carcinoma (TCGA, PanCancer Atlas)	TCGA-B0-5713-01	Renal Clear Cell Carcinoma	H805R	OncoKB: Unknown, level NA;CIViC: NA;MyCancerGenome: not present;CancerHotspot: no;3DHotspot: no	MutationAssessor: impact: low, score: 0.89;SIFT: impact: deleterious, score: 0;Polyphen-2: impact: benign, score: 0.36	Missense_Mutation	SNP	gain	1	.	.	.	7	55249116	55249116	A	G	7:g.55249116A>G	ENST00000275493.2:c.2414A>G	0.28		31	80		89	97	20/28
Kidney Renal Papillary Cell Carcinoma (TCGA, PanCancer Atlas)	TCGA-A4-7583-01	Papillary Renal Cell Carcinoma	H1156N	OncoKB: Unknown, level NA;CIViC: NA;MyCancerGenome: not present;CancerHotspot: no;3DHotspot: no	MutationAssessor: impact: low, score: 0.895;SIFT: impact: tolerated, score: 0.05;Polyphen-2: impact: benign, score: 0.024	Missense_Mutation	SNP	diploid		.	.	.	7	55273143	55273143	C	A	7:g.55273143C>A	ENST00000275493.2:c.3466C>A	0.1		4	35		54	295	28/28
Acute Myeloid Leukemia (TCGA, PanCancer Atlas)	TCGA-AB-2863-03	Acute Myeloid Leukemia	T1141S	OncoKB: Unknown, level NA;CIViC: NA;MyCancerGenome: not present;CancerHotspot: no;3DHotspot: no	MutationAssessor: impact: medium, score: 2.32;SIFT: impact: tolerated, score: 0.41;Polyphen-2: impact: benign, score: 0.374	Missense_Mutation	SNP	diploid		Somatic	Valid	genome.wustl.edu	7	55273099	55273099	C	G	7:g.55273099C>G	ENST00000275493.2:c.3422C>G							19	28/28
Acute Myeloid Leukemia (TCGA, PanCancer Atlas)	TCGA-AB-2878-03	Acute Myeloid Leukemia	T638M	OncoKB: Unknown, level NA;CIViC: NA;MyCancerGenome: not present;CancerHotspot: no;3DHotspot: no	MutationAssessor: impact: low, score: 1.1;SIFT: impact: tolerated, score: 0.11;Polyphen-2: impact: benign, score: 0	Missense_Mutation	SNP	diploid	2	Somatic	Valid	genome.wustl.edu	7	55238900	55238900	C	T	7:g.55238900C>T	ENST00000275493.2:c.1913C>T							13	16/28	2.38582e-05		rs571064657
Brain Lower Grade Glioma (TCGA, PanCancer Atlas)	TCGA-FG-A87Q-01	Astrocytoma	V774M	OncoKB: Unknown, level NA;CIViC: Predictive: 1;MyCancerGenome: not present;CancerHotspot: no;3DHotspot: no	MutationAssessor: impact: medium, score: 2.935;SIFT: impact: deleterious, score: 0;Polyphen-2: impact: probably_damaging, score: 0.996	Missense_Mutation	SNP	amp	8	.	.	.	7	55249022	55249022	G	A	7:g.55249022G>A	ENST00000275493.2:c.2320G>A	0.09		94	925		105	54	20/28	3.97943e-06		rs567477136
Brain Lower Grade Glioma (TCGA, PanCancer Atlas)	TCGA-FG-A4MW-01	Oligoastrocytoma	G312W	OncoKB: Unknown, level NA;CIViC: NA;MyCancerGenome: not present;CancerHotspot: no;3DHotspot: no	MutationAssessor: impact: low, score: 1.32;SIFT: impact: deleterious, score: 0;Polyphen-2: impact: possibly_damaging, score: 0.764	Missense_Mutation	SNP	amp	1	.	.	.	7	55223567	55223567	G	T	7:g.55223567G>T	ENST00000275493.2:c.934G>T	0.91		3476	355		74	60	2020-08-28
Brain Lower Grade Glioma (TCGA, PanCancer Atlas)	TCGA-DU-A5TY-01	Astrocytoma	E317K	OncoKB: Unknown, level NA;CIViC: NA;MyCancerGenome: not present;CancerHotspot: no;3DHotspot: no	MutationAssessor: impact: medium, score: 2.385;SIFT: impact: deleterious, score: 0;Polyphen-2: impact: probably_damaging, score: 0.964	Missense_Mutation	SNP	gain	1	.	.	.	7	55223582	55223582	G	A	7:g.55223582G>A	ENST00000275493.2:c.949G>A	0.06		81	1261		65	49	2020-08-28
Brain Lower Grade Glioma (TCGA, PanCancer Atlas)	TCGA-DU-A5TY-01	Astrocytoma	D321Y	OncoKB: Unknown, level NA;CIViC: NA;MyCancerGenome: not present;CancerHotspot: no;3DHotspot: no	MutationAssessor: impact: medium, score: 2.495;SIFT: impact: deleterious, score: 0;Polyphen-2: impact: possibly_damaging, score: 0.865	Missense_Mutation	SNP	gain	1	.	.	.	7	55223594	55223594	G	T	7:g.55223594G>T	ENST00000275493.2:c.961G>T	0.07		77	1030		61	49	2020-08-28
Brain Lower Grade Glioma (TCGA, PanCancer Atlas)	TCGA-DU-5852-01	Oligoastrocytoma	I981F	OncoKB: Unknown, level NA;CIViC: NA;MyCancerGenome: not present;CancerHotspot: no;3DHotspot: no	MutationAssessor: impact: medium, score: 3.39;SIFT: impact: deleterious, score: 0;Polyphen-2: impact: possibly_damaging, score: 0.607	Missense_Mutation	SNP	amp	1	.	.	.	7	55268101	55268101	A	T	7:g.55268101A>T	ENST00000275493.2:c.2941A>T	0.02		25	1307		51	65	24/28
Brain Lower Grade Glioma (TCGA, PanCancer Atlas)	TCGA-DU-A7TD-01	Oligoastrocytoma	Q276L	OncoKB: Unknown, level NA;CIViC: NA;MyCancerGenome: not present;CancerHotspot: no;3DHotspot: no	MutationAssessor: impact: medium, score: 2.39;SIFT: impact: deleterious, score: 0.01;Polyphen-2: impact: possibly_damaging, score: 0.721	Missense_Mutation	SNP	amp		.	.	.	7	55221783	55221783	A	T	7:g.55221783A>T	ENST00000275493.2:c.827A>T	0.97		2449	83		48	36	2020-07-28
Brain Lower Grade Glioma (TCGA, PanCancer Atlas)	TCGA-E1-A7YQ-01	Oligodendroglioma	G665D	OncoKB: Unknown, level NA;CIViC: NA;MyCancerGenome: not present;CancerHotspot: no;3DHotspot: no	MutationAssessor: impact: medium, score: 2.3;SIFT: impact: deleterious, score: 0.02;Polyphen-2: impact: possibly_damaging, score: 0.726	Missense_Mutation	SNP	amp		.	.	.	7	55240750	55240750	G	A	7:g.55240750G>A	ENST00000275493.2:c.1994G>A	0.83		411	87		73	34	17/28
Brain Lower Grade Glioma (TCGA, PanCancer Atlas)	TCGA-S9-A6WN-01	Astrocytoma	Y891C	OncoKB: Unknown, level NA;CIViC: NA;MyCancerGenome: not present;CancerHotspot: no;3DHotspot: no	MutationAssessor: impact: medium, score: 2.57;SIFT: impact: deleterious, score: 0;Polyphen-2: impact: probably_damaging, score: 0.999	Missense_Mutation	SNP	diploid		.	.	.	7	55260505	55260505	A	G	7:g.55260505A>G	ENST00000275493.2:c.2672A>G	0.2		28	109		111	32	22/28			rs987884612
Brain Lower Grade Glioma (TCGA, PanCancer Atlas)	TCGA-VM-A8CD-01	Astrocytoma	A583S	OncoKB: Unknown, level NA;CIViC: NA;MyCancerGenome: not present;CancerHotspot: no;3DHotspot: no	MutationAssessor: impact: low, score: 1.81;SIFT: impact: tolerated, score: 0.18;Polyphen-2: impact: benign, score: 0.055	Missense_Mutation	SNP	diploid		.	.	.	7	55232997	55232997	G	T	7:g.55232997G>T	ENST00000275493.2:c.1747G>T	0.16		13	66		71	22	15/28
Brain Lower Grade Glioma (TCGA, PanCancer Atlas)	TCGA-DU-6392-01	Astrocytoma	A613V	OncoKB: Unknown, level NA;CIViC: NA;MyCancerGenome: not present;CancerHotspot: no;3DHotspot: no	MutationAssessor: impact: low, score: 1.715;SIFT: impact: tolerated, score: 0.19;Polyphen-2: impact: benign, score: 0.015	Missense_Mutation	SNP	gain		.	.	.	7	55233088	55233088	C	T	7:g.55233088C>T	ENST00000275493.2:c.1838C>T	0.17		12	59		55	10863	15/28
Liver Hepatocellular Carcinoma (TCGA, PanCancer Atlas)	TCGA-DD-AAE3-01	Hepatocellular Carcinoma	I744V	OncoKB: Unknown, level NA;CIViC: NA;MyCancerGenome: not present;CancerHotspot: no;3DHotspot: no	MutationAssessor: impact: neutral, score: -0.13;SIFT: impact: deleterious, score: 0.03;Polyphen-2: impact: probably_damaging, score: 0.92	Missense_Mutation	SNP	gain	3	.	.	.	7	55242460	55242460	A	G	7:g.55242460A>G	ENST00000275493.2:c.2230A>G	0.12		11	80		72	151	19/28			rs1554348865
Liver Hepatocellular Carcinoma (TCGA, PanCancer Atlas)	TCGA-DD-A73A-01	Hepatocellular Carcinoma	P411R	OncoKB: Unknown, level NA;CIViC: NA;MyCancerGenome: not present;CancerHotspot: no;3DHotspot: no	MutationAssessor: impact: medium, score: 3.05;SIFT: impact: deleterious, score: 0;Polyphen-2: impact: probably_damaging, score: 1	Missense_Mutation	SNP	diploid		.	.	.	7	55225380	55225380	C	G	7:g.55225380C>G	ENST00000275493.2:c.1232C>G	0.35		39	72		137	90	2020-11-28
Liver Hepatocellular Carcinoma (TCGA, PanCancer Atlas)	TCGA-DD-A1EK-01	Hepatocellular Carcinoma	T1150S	OncoKB: Unknown, level NA;CIViC: NA;MyCancerGenome: not present;CancerHotspot: no;3DHotspot: no	MutationAssessor: impact: neutral, score: -0.27;SIFT: impact: tolerated, score: 0.2;Polyphen-2: impact: benign, score: 0	Missense_Mutation	SNP	diploid		.	.	.	7	55273125	55273125	A	T	7:g.55273125A>T	ENST00000275493.2:c.3448A>T	0.36		43	78		132	63	28/28
Liver Hepatocellular Carcinoma (TCGA, PanCancer Atlas)	TCGA-XR-A8TF-01	Hepatocellular Carcinoma	S1162C	OncoKB: Unknown, level NA;CIViC: NA;MyCancerGenome: not present;CancerHotspot: no;3DHotspot: no	MutationAssessor: impact: low, score: 1.795;SIFT: impact: deleterious, score: 0.04;Polyphen-2: impact: benign, score: 0.294	Missense_Mutation	SNP	gain		.	.	.	7	55273161	55273161	A	T	7:g.55273161A>T	ENST00000275493.2:c.3484A>T	0.04		10	249		165	134	28/28
Lung Adenocarcinoma (TCGA, PanCancer Atlas)	TCGA-05-4382-01	Lung Adenocarcinoma	E545Q	OncoKB: Unknown, level NA;CIViC: NA;MyCancerGenome: not present;CancerHotspot: no;3DHotspot: no	MutationAssessor: impact: low, score: 1.905;SIFT: impact: tolerated, score: 0.07;Polyphen-2: impact: benign, score: 0.058	Missense_Mutation	SNP	gain		.	.	.	7	55231427	55231427	G	C	7:g.55231427G>C	ENST00000275493.2:c.1633G>C	0.08		17	196		65	1547	14/28
Lung Adenocarcinoma (TCGA, PanCancer Atlas)	TCGA-05-4410-01	Lung Adenocarcinoma	R377S	OncoKB: Unknown, level NA;CIViC: NA;MyCancerGenome: not present;CancerHotspot: no;3DHotspot: no	MutationAssessor: impact: neutral, score: 0.645;SIFT: impact: tolerated, score: 0.47;Polyphen-2: impact: benign, score: 0.003	Missense_Mutation	SNP	gain	1	.	.	.	7	55224350	55224350	G	T	7:g.55224350G>T	ENST00000275493.2:c.1131G>T	0.31		34	74		86	1009	2020-09-28
Lung Adenocarcinoma (TCGA, PanCancer Atlas)	TCGA-78-7147-01	Lung Adenocarcinoma	L387M	OncoKB: Unknown, level NA;CIViC: NA;MyCancerGenome: not present;CancerHotspot: no;3DHotspot: no	MutationAssessor: impact: neutral, score: 0.435;SIFT: impact: tolerated, score: 0.28;Polyphen-2: impact: probably_damaging, score: 0.981	Missense_Mutation	SNP	gain	2	.	.	.	7	55224477	55224477	C	A	7:g.55224477C>A	ENST00000275493.2:c.1159C>A	0.54	0.01	39	33	1	89	306	2020-10-28
Lung Adenocarcinoma (TCGA, PanCancer Atlas)	TCGA-78-7155-01	Lung Adenocarcinoma	Q432H	OncoKB: Unknown, level NA;CIViC: NA;MyCancerGenome: not present;CancerHotspot: no;3DHotspot: no	MutationAssessor: impact: low, score: 1.035;SIFT: impact: tolerated, score: 0.42;Polyphen-2: impact: benign, score: 0.01	Missense_Mutation	SNP	amp	1	.	.	.	7	55225444	55225444	A	T	7:g.55225444A>T	ENST00000275493.2:c.1296A>T	0.33		37	74		47	1406	2020-11-28
Lung Adenocarcinoma (TCGA, PanCancer Atlas)	TCGA-78-7155-01	Lung Adenocarcinoma	G901V	OncoKB: Unknown, level NA;CIViC: NA;MyCancerGenome: not present;CancerHotspot: no;3DHotspot: no	MutationAssessor: impact: high, score: 4.69;SIFT: impact: deleterious, score: 0;Polyphen-2: impact: probably_damaging, score: 1	Missense_Mutation	SNP	amp	1	.	.	.	7	55266410	55266410	G	T	7:g.55266410G>T	ENST00000275493.2:c.2702G>T	0.1		22	202		98	1406	23/28
Lung Adenocarcinoma (TCGA, PanCancer Atlas)	TCGA-78-7158-01	Lung Adenocarcinoma	L907M	OncoKB: Unknown, level NA;CIViC: NA;MyCancerGenome: not present;CancerHotspot: no;3DHotspot: no	MutationAssessor: impact: low, score: 1.065;SIFT: impact: deleterious, score: 0.02;Polyphen-2: impact: probably_damaging, score: 0.958	Missense_Mutation	SNP	diploid	1	.	.	.	7	55266427	55266427	T	A	7:g.55266427T>A	ENST00000275493.2:c.2719T>A	0.44		48	62		122	249	23/28			rs1218871031
Lung Adenocarcinoma (TCGA, PanCancer Atlas)	TCGA-95-7039-01	Lung Adenocarcinoma	S921R	OncoKB: Inconclusive, level NA;CIViC: NA;MyCancerGenome: not present;CancerHotspot: no;3DHotspot: no	MutationAssessor: impact: neutral, score: 0.165;SIFT: impact: tolerated, score: 1;Polyphen-2: impact: benign, score: 0.06	Missense_Mutation	SNP	gain	4	.	.	.	7	55266471	55266471	C	A	7:g.55266471C>A	ENST00000275493.2:c.2763C>A	0.12		14	99		96	1209	23/28	3.1841e-05		rs770529788
Lung Adenocarcinoma (TCGA, PanCancer Atlas)	TCGA-95-7947-01	Lung Adenocarcinoma	I91V	OncoKB: Unknown, level NA;CIViC: NA;MyCancerGenome: not present;CancerHotspot: no;3DHotspot: no	MutationAssessor: impact: low, score: 1.855;SIFT: impact: tolerated, score: 0.57;Polyphen-2: impact: benign, score: 0.014	Missense_Mutation	SNP	gain	3	.	.	.	7	55211028	55211028	A	G	7:g.55211028A>G	ENST00000275493.2:c.271A>G	0.27		40	110		132	476	2020-03-28
Lung Adenocarcinoma (TCGA, PanCancer Atlas)	TCGA-95-7947-01	Lung Adenocarcinoma	R1052I	OncoKB: Unknown, level NA;CIViC: NA;MyCancerGenome: not present;CancerHotspot: no;3DHotspot: no	MutationAssessor: impact: medium, score: 1.995;SIFT: impact: tolerated, score: 0.12;Polyphen-2: impact: benign, score: 0.003	Missense_Mutation	SNP	gain	1	.	.	.	7	55269468	55269468	G	T	7:g.55269468G>T	ENST00000275493.2:c.3155G>T	0.23		56	186		220	476	26/28
Lung Adenocarcinoma (TCGA, PanCancer Atlas)	TCGA-55-6968-01	Lung Adenocarcinoma	E866K	OncoKB: Likely Neutral, level NA;CIViC: NA;MyCancerGenome: not present;CancerHotspot: no;3DHotspot: no	MutationAssessor: impact: low, score: 1.13;SIFT: impact: deleterious, score: 0;Polyphen-2: impact: probably_damaging, score: 0.994	Missense_Mutation	SNP	shallowdel	7	.	.	.	7	55259538	55259538	G	A	7:g.55259538G>A	ENST00000275493.2:c.2596G>A	0.07		7	88		61	460	21/28	3.98124e-06		rs756703787
Lung Adenocarcinoma (TCGA, PanCancer Atlas)	TCGA-55-7570-01	Lung Adenocarcinoma	V300M	OncoKB: Unknown, level NA;CIViC: NA;MyCancerGenome: not present;CancerHotspot: no;3DHotspot: no	MutationAssessor: impact: medium, score: 2.9;SIFT: impact: deleterious, score: 0;Polyphen-2: impact: probably_damaging, score: 0.994	Missense_Mutation	SNP	diploid	1	.	.	.	7	55223531	55223531	G	A	7:g.55223531G>A	ENST00000275493.2:c.898G>A	0.21		17	63		83	355	2020-08-28	0
Lung Adenocarcinoma (TCGA, PanCancer Atlas)	TCGA-05-4402-01	Lung Adenocarcinoma	I759N	OncoKB: Unknown, level NA;CIViC: NA;MyCancerGenome: not present;CancerHotspot: no;3DHotspot: no	MutationAssessor: impact: medium, score: 2.27;SIFT: impact: deleterious, score: 0;Polyphen-2: impact: probably_damaging, score: 1	Missense_Mutation	SNP	amp	2	.	.	.	7	55242506	55242506	T	A	7:g.55242506T>A	ENST00000275493.2:c.2276T>A	0.33		31	63		58	121	19/28
Lung Adenocarcinoma (TCGA, PanCancer Atlas)	TCGA-17-Z026-01	Lung Adenocarcinoma	G721V	OncoKB: Unknown, level NA;CIViC: NA;MyCancerGenome: not present;CancerHotspot: no;3DHotspot: no	MutationAssessor: impact: high, score: 4.385;SIFT: impact: deleterious, score: 0;Polyphen-2: impact: probably_damaging, score: 1	Missense_Mutation	SNP		9	.	.	.	7	55241714	55241714	G	T	7:g.55241714G>T	ENST00000275493.2:c.2162G>T	0.19		5	21		46	873	18/28
Lung Squamous Cell Carcinoma (TCGA, PanCancer Atlas)	TCGA-22-4601-01	Lung Squamous Cell Carcinoma	P1019L	OncoKB: Unknown, level NA;CIViC: NA;MyCancerGenome: not present;CancerHotspot: no;3DHotspot: no	MutationAssessor: impact: medium, score: 3.435;SIFT: impact: deleterious, score: 0;Polyphen-2: impact: probably_damaging, score: 0.996	Missense_Mutation	SNP	shallowdel	1	.	.	.	7	55268990	55268990	C	T	7:g.55268990C>T	ENST00000275493.2:c.3056C>T	0.61		68	43		199	164	25/28
Lung Squamous Cell Carcinoma (TCGA, PanCancer Atlas)	TCGA-60-2708-01	Lung Squamous Cell Carcinoma	S720C	OncoKB: Unknown, level NA;CIViC: NA;MyCancerGenome: not present;CancerHotspot: no;3DHotspot: no	MutationAssessor: impact: medium, score: 2.02;SIFT: impact: deleterious, score: 0;Polyphen-2: impact: probably_damaging, score: 0.987	Missense_Mutation	SNP	gain	9	.	.	.	7	55241711	55241711	C	G	7:g.55241711C>G	ENST00000275493.2:c.2159C>G	0.04		7	180		131	188	18/28	3.97659e-06		rs772799315
Lung Squamous Cell Carcinoma (TCGA, PanCancer Atlas)	TCGA-43-A56U-01	Lung Squamous Cell Carcinoma	P192R	OncoKB: Unknown, level NA;CIViC: NA;MyCancerGenome: not present;CancerHotspot: no;3DHotspot: no	MutationAssessor: impact: low, score: 1.675;SIFT: impact: tolerated, score: 0.47;Polyphen-2: impact: benign, score: 0.063	Missense_Mutation	SNP	diploid		.	.	.	7	55219002	55219002	C	G	7:g.55219002C>G	ENST00000275493.2:c.575C>G	0.1		9	84		118	221	2020-05-28
Lung Squamous Cell Carcinoma (TCGA, PanCancer Atlas)	TCGA-56-8304-01	Lung Squamous Cell Carcinoma	G87C	OncoKB: Unknown, level NA;CIViC: NA;MyCancerGenome: not present;CancerHotspot: no;3DHotspot: no	MutationAssessor: impact: high, score: 4.37;SIFT: impact: deleterious, score: 0;Polyphen-2: impact: probably_damaging, score: 1	Missense_Mutation	SNP	gain		.	.	.	7	55211016	55211016	G	T	7:g.55211016G>T	ENST00000275493.2:c.259G>T	0.36		42	76		96	230	2020-03-28
Lung Squamous Cell Carcinoma (TCGA, PanCancer Atlas)	TCGA-77-8156-01	Lung Squamous Cell Carcinoma	Y1138C	OncoKB: Unknown, level NA;CIViC: NA;MyCancerGenome: not present;CancerHotspot: no;3DHotspot: no	MutationAssessor: impact: medium, score: 3.02;SIFT: impact: deleterious, score: 0;Polyphen-2: impact: probably_damaging, score: 0.948	Missense_Mutation	SNP	gain		.	.	.	7	55273090	55273090	A	G	7:g.55273090A>G	ENST00000275493.2:c.3413A>G	0.26		31	86		74	185	28/28	3.98403e-06		rs1562810543
Ovarian Serous Cystadenocarcinoma (TCGA, PanCancer Atlas)	TCGA-13-1501-01	Serous Ovarian Cancer	Q1164R	OncoKB: Unknown, level NA;CIViC: NA;MyCancerGenome: not present;CancerHotspot: no;3DHotspot: no	MutationAssessor: impact: low, score: 1.64;SIFT: impact: tolerated, score: 0.69;Polyphen-2: impact: benign, score: 0.037	Missense_Mutation	SNP	diploid	3	.	.	.	7	55273168	55273168	A	G	7:g.55273168A>G	ENST00000275493.2:c.3491A>G	0.29		72	173		422	83	28/28
Ovarian Serous Cystadenocarcinoma (TCGA, PanCancer Atlas)	TCGA-24-2289-01	Serous Ovarian Cancer	K716R	OncoKB: Unknown, level NA;CIViC: NA;MyCancerGenome: not present;CancerHotspot: no;3DHotspot: no	MutationAssessor: impact: low, score: 1.07;SIFT: impact: tolerated, score: 0.23;Polyphen-2: impact: benign, score: 0.283	Missense_Mutation	SNP	gain	1	.	.	.	7	55241699	55241699	A	G	7:g.55241699A>G	ENST00000275493.2:c.2147A>G	0.31		19	43		109	167	18/28
Ovarian Serous Cystadenocarcinoma (TCGA, PanCancer Atlas)	TCGA-25-2404-01	Serous Ovarian Cancer	V461M	OncoKB: Unknown, level NA;CIViC: NA;MyCancerGenome: not present;CancerHotspot: no;3DHotspot: no	MutationAssessor: impact: medium, score: 3.03;SIFT: impact: deleterious, score: 0;Polyphen-2: impact: possibly_damaging, score: 0.882	Missense_Mutation	SNP	diploid		.	.	.	7	55227914	55227914	G	A	7:g.55227914G>A	ENST00000275493.2:c.1381G>A	0.21		15	57		91	58	2020-12-28
Pancreatic Adenocarcinoma (TCGA, PanCancer Atlas)	TCGA-IB-7651-01	Pancreatic Adenocarcinoma	D800G	OncoKB: Unknown, level NA;CIViC: NA;MyCancerGenome: not present;CancerHotspot: no;3DHotspot: no	MutationAssessor: impact: low, score: 1.13;SIFT: impact: deleterious, score: 0;Polyphen-2: impact: probably_damaging, score: 0.994	Missense_Mutation	SNP	diploid	2	.	.	.	7	55249101	55249101	A	G	7:g.55249101A>G	ENST00000275493.2:c.2399A>G	0.19		76	319		83	14306	20/28
Prostate Adenocarcinoma (TCGA, PanCancer Atlas)	TCGA-KK-A59Y-01	Prostate Adenocarcinoma	G312W	OncoKB: Unknown, level NA;CIViC: NA;MyCancerGenome: not present;CancerHotspot: no;3DHotspot: no	MutationAssessor: impact: low, score: 1.32;SIFT: impact: deleterious, score: 0;Polyphen-2: impact: possibly_damaging, score: 0.764	Missense_Mutation	SNP	diploid	1	.	.	.	7	55223567	55223567	G	T	7:g.55223567G>T	ENST00000275493.2:c.934G>T	0.5		66	67		70	23	2020-08-28
Prostate Adenocarcinoma (TCGA, PanCancer Atlas)	TCGA-EJ-5495-01	Prostate Adenocarcinoma	G1185V	OncoKB: Unknown, level NA;CIViC: NA;MyCancerGenome: not present;CancerHotspot: no;3DHotspot: no	MutationAssessor: impact: medium, score: 2.015;SIFT: impact: deleterious, score: 0.01;Polyphen-2: impact: probably_damaging, score: 0.922	Missense_Mutation	SNP	gain	1	.	.	.	7	55273231	55273231	G	T	7:g.55273231G>T	ENST00000275493.2:c.3554G>T	0.11		9	75		147	68	28/28
Prostate Adenocarcinoma (TCGA, PanCancer Atlas)	TCGA-YL-A8SP-01	Prostate Adenocarcinoma	F997V	OncoKB: Unknown, level NA;CIViC: NA;MyCancerGenome: not present;CancerHotspot: no;3DHotspot: no	MutationAssessor: impact: medium, score: 3.365;SIFT: impact: deleterious, score: 0;Polyphen-2: impact: possibly_damaging, score: 0.581	Missense_Mutation	SNP	diploid		.	.	.	7	55268923	55268923	T	G	7:g.55268923T>G	ENST00000275493.2:c.2989T>G	0.34		39	76		67	20	25/28
Sarcoma (TCGA, PanCancer Atlas)	TCGA-QC-A7B5-01	Undifferentiated Pleomorphic Sarcoma/Malignant Fibrous Histiocytoma/High-Grade Spindle Cell Sarcoma	P741L	OncoKB: Unknown, level NA;CIViC: NA;MyCancerGenome: not present;CancerHotspot: no;3DHotspot: no	MutationAssessor: impact: low, score: 1.22;SIFT: impact: deleterious, score: 0;Polyphen-2: impact: probably_damaging, score: 1	Missense_Mutation	SNP	gain	4	.	.	.	7	55242452	55242452	C	T	7:g.55242452C>T	ENST00000275493.2:c.2222C>T	0.46		31	37		58	1754	19/28
Sarcoma (TCGA, PanCancer Atlas)	TCGA-X6-A7WB-01	Leiomyosarcoma	K1182N	OncoKB: Unknown, level NA;CIViC: NA;MyCancerGenome: not present;CancerHotspot: no;3DHotspot: no	MutationAssessor: impact: medium, score: 1.95;SIFT: impact: tolerated, score: 0.14;Polyphen-2: impact: benign, score: 0.122	Missense_Mutation	SNP	diploid		.	.	.	7	55273223	55273223	G	T	7:g.55273223G>T	ENST00000275493.2:c.3546G>T	0.23		3	10		22	346	28/28
Skin Cutaneous Melanoma (TCGA, PanCancer Atlas)	TCGA-GN-A266-06	Cutaneous Melanoma	H47Y	OncoKB: Likely Neutral, level NA;CIViC: NA;MyCancerGenome: not present;CancerHotspot: no;3DHotspot: no	MutationAssessor: impact: medium, score: 2.545;SIFT: impact: deleterious, score: 0;Polyphen-2: impact: possibly_damaging, score: 0.627	Missense_Mutation	SNP	gain	1	.	.	.	7	55210029	55210029	C	T	7:g.55210029C>T	ENST00000275493.2:c.139C>T	0.15		16	93		81	3278	2020-02-28
Skin Cutaneous Melanoma (TCGA, PanCancer Atlas)	TCGA-DA-A3F3-06	Cutaneous Melanoma	N604D	OncoKB: Unknown, level NA;CIViC: NA;MyCancerGenome: not present;CancerHotspot: no;3DHotspot: no	MutationAssessor: impact: neutral, score: 0.02;SIFT: impact: tolerated, score: 0.85;Polyphen-2: impact: benign, score: 0	Missense_Mutation	SNP	diploid	2	.	.	.	7	55233060	55233060	A	G	7:g.55233060A>G	ENST00000275493.2:c.1810A>G	0.38		37	60		125	259	15/28
Skin Cutaneous Melanoma (TCGA, PanCancer Atlas)	TCGA-FR-A726-01	Cutaneous Melanoma	E400K	OncoKB: Unknown, level NA;CIViC: NA;MyCancerGenome: not present;CancerHotspot: no;3DHotspot: no	MutationAssessor: impact: high, score: 3.795;SIFT: impact: deleterious, score: 0.02;Polyphen-2: impact: probably_damaging, score: 0.996	Missense_Mutation	SNP		1	.	.	.	7	55224516	55224516	G	A	7:g.55224516G>A	ENST00000275493.2:c.1198G>A	0.31		30	66		73	5858	2020-10-28
Skin Cutaneous Melanoma (TCGA, PanCancer Atlas)	TCGA-EE-A2GO-06	Cutaneous Melanoma	D1009N	OncoKB: Likely Neutral, level NA;CIViC: NA;MyCancerGenome: not present;CancerHotspot: no;3DHotspot: no	MutationAssessor: impact: medium, score: 2.625;SIFT: impact: deleterious, score: 0.03;Polyphen-2: impact: possibly_damaging, score: 0.516	Missense_Mutation	SNP	gain	1	.	.	.	7	55268959	55268959	G	A	7:g.55268959G>A	ENST00000275493.2:c.3025G>A	0.38		51	82		110	1909	25/28	1.1929e-05		rs148019583
Skin Cutaneous Melanoma (TCGA, PanCancer Atlas)	TCGA-EB-A44P-01	Cutaneous Melanoma	P1178L	OncoKB: Unknown, level NA;CIViC: NA;MyCancerGenome: not present;CancerHotspot: no;3DHotspot: no	MutationAssessor: impact: medium, score: 2.125;SIFT: impact: deleterious, score: 0;Polyphen-2: impact: possibly_damaging, score: 0.796	Missense_Mutation	SNP		1	.	.	.	7	55273210	55273210	C	T	7:g.55273210C>T	ENST00000275493.2:c.3533C>T	0.22		6	21		102	276	28/28
Skin Cutaneous Melanoma (TCGA, PanCancer Atlas)	TCGA-EE-A2MF-06	Cutaneous Melanoma	P100S	OncoKB: Unknown, level NA;CIViC: NA;MyCancerGenome: not present;CancerHotspot: no;3DHotspot: no	MutationAssessor: impact: medium, score: 2.435;SIFT: impact: deleterious, score: 0.01;Polyphen-2: impact: probably_damaging, score: 0.922	Missense_Mutation	SNP	diploid		.	.	.	7	55211055	55211055	C	T	7:g.55211055C>T	ENST00000275493.2:c.298C>T	0.44		77	98		100	620	2020-03-28			rs866460345
Skin Cutaneous Melanoma (TCGA, PanCancer Atlas)	TCGA-EE-A2MI-06	Cutaneous Melanoma	P622S	OncoKB: Unknown, level NA;CIViC: NA;MyCancerGenome: not present;CancerHotspot: no;3DHotspot: no	MutationAssessor: impact: low, score: 1.54;SIFT: impact: tolerated, score: 0.49;Polyphen-2: impact: benign, score: 0	Missense_Mutation	SNP	diploid	1	.	.	.	7	55233114	55233114	C	T	7:g.55233114C>T	ENST00000275493.2:c.1864C>T	0.25		13	38		40	905	15/28
Skin Cutaneous Melanoma (TCGA, PanCancer Atlas)	TCGA-D3-A8GC-06	Cutaneous Melanoma	S447F	OncoKB: Unknown, level NA;CIViC: NA;MyCancerGenome: not present;CancerHotspot: no;3DHotspot: no	MutationAssessor: impact: medium, score: 2.525;SIFT: impact: tolerated, score: 0.24;Polyphen-2: impact: probably_damaging, score: 0.993	Missense_Mutation	SNP	gain	1	.	.	.	7	55227873	55227873	C	T	7:g.55227873C>T	ENST00000275493.2:c.1340C>T	0.41		39	55		89	694	2020-12-28
Skin Cutaneous Melanoma (TCGA, PanCancer Atlas)	TCGA-QB-AA9O-06	Cutaneous Melanoma	D368N	OncoKB: Unknown, level NA;CIViC: NA;MyCancerGenome: not present;CancerHotspot: no;3DHotspot: no	MutationAssessor: impact: neutral, score: -0.595;SIFT: impact: tolerated, score: 1;Polyphen-2: impact: benign, score: 0.081	Missense_Mutation	SNP	gain		.	.	.	7	55224321	55224321	G	A	7:g.55224321G>A	ENST00000275493.2:c.1102G>A	0.22		17	59		66	1261	2020-09-28
Skin Cutaneous Melanoma (TCGA, PanCancer Atlas)	TCGA-GN-A266-06	Cutaneous Melanoma	E922K	OncoKB: Unknown, level NA;CIViC: NA;MyCancerGenome: not present;CancerHotspot: no;3DHotspot: no	MutationAssessor: impact: low, score: 1.76;SIFT: impact: deleterious, score: 0.05;Polyphen-2: impact: possibly_damaging, score: 0.701	Missense_Mutation	SNP	gain	1	.	.	.	7	55266472	55266472	G	A	7:g.55266472G>A	ENST00000275493.2:c.2764G>A	0.28		30	78		125	3278	23/28	3.18532e-05		rs961150162
Skin Cutaneous Melanoma (TCGA, PanCancer Atlas)	TCGA-FS-A1ZK-06	Cutaneous Melanoma	L541F	OncoKB: Unknown, level NA;CIViC: NA;MyCancerGenome: not present;CancerHotspot: no;3DHotspot: no	MutationAssessor: impact: neutral, score: 0.64;SIFT: impact: tolerated, score: 0.2;Polyphen-2: impact: benign, score: 0	Missense_Mutation	SNP	gain	2	.	.	.	7	55229314	55229314	C	T	7:g.55229314C>T	ENST00000275493.2:c.1621C>T	0.25		45	132		161	1459	13/28	1.19296e-05		rs1208487495
Skin Cutaneous Melanoma (TCGA, PanCancer Atlas)	TCGA-D3-A2JP-06	Cutaneous Melanoma	L101F	OncoKB: Unknown, level NA;CIViC: NA;MyCancerGenome: not present;CancerHotspot: no;3DHotspot: no	MutationAssessor: impact: low, score: 1.615;SIFT: impact: deleterious, score: 0.02;Polyphen-2: impact: probably_damaging, score: 1	Missense_Mutation	SNP	gain	1	.	.	.	7	55211060	55211060	G	T	7:g.55211060G>T	ENST00000275493.2:c.303G>T	0.38		37	61		109	4149	2020-03-28
Skin Cutaneous Melanoma (TCGA, PanCancer Atlas)	TCGA-ER-A19E-06	Cutaneous Melanoma	E319K	OncoKB: Unknown, level NA;CIViC: NA;MyCancerGenome: not present;CancerHotspot: no;3DHotspot: no	MutationAssessor: impact: low, score: 1.845;SIFT: impact: tolerated, score: 0.08;Polyphen-2: impact: possibly_damaging, score: 0.887	Missense_Mutation	SNP	gain	1	.	.	.	7	55223588	55223588	G	A	7:g.55223588G>A	ENST00000275493.2:c.955G>A	0.57		28	21		40	542	2020-08-28
Skin Cutaneous Melanoma (TCGA, PanCancer Atlas)	TCGA-EE-A2MR-06	Cutaneous Melanoma	P512S	OncoKB: Unknown, level NA;CIViC: NA;MyCancerGenome: not present;CancerHotspot: no;3DHotspot: no	MutationAssessor: impact: neutral, score: -0.51;SIFT: impact: tolerated, score: 0.97;Polyphen-2: impact: benign, score: 0	Missense_Mutation	SNP	gain	1	.	.	.	7	55229227	55229227	C	T	7:g.55229227C>T	ENST00000275493.2:c.1534C>T	0.09		11	111		109	2920	13/28	7.95551e-06	134020	rs587778248
Skin Cutaneous Melanoma (TCGA, PanCancer Atlas)	TCGA-EE-A20C-06	Cutaneous Melanoma	K737E	OncoKB: Unknown, level NA;CIViC: NA;MyCancerGenome: not present;CancerHotspot: no;3DHotspot: no	MutationAssessor: impact: neutral, score: 0.015;SIFT: impact: deleterious, score: 0.03;Polyphen-2: impact: benign, score: 0.369	Missense_Mutation	SNP	shallowdel	1	.	.	.	7	55242439	55242439	A	G	7:g.55242439A>G	ENST00000275493.2:c.2209A>G	0.97		39	1		88	2073	19/28
Skin Cutaneous Melanoma (TCGA, PanCancer Atlas)	TCGA-EE-A3AB-06	Cutaneous Melanoma	Q390K	OncoKB: Unknown, level NA;CIViC: NA;MyCancerGenome: not present;CancerHotspot: no;3DHotspot: no	MutationAssessor: impact: neutral, score: -0.135;SIFT: impact: tolerated, score: 0.29;Polyphen-2: impact: benign, score: 0	Missense_Mutation	SNP	gain	1	.	.	.	7	55224486	55224486	C	A	7:g.55224486C>A	ENST00000275493.2:c.1168C>A	0.15		10	56		87	658	2020-10-28
Skin Cutaneous Melanoma (TCGA, PanCancer Atlas)	TCGA-FW-A3R5-06	Cutaneous Melanoma	S364F	OncoKB: Unknown, level NA;CIViC: NA;MyCancerGenome: not present;CancerHotspot: no;3DHotspot: no	MutationAssessor: impact: low, score: 1.24;SIFT: impact: deleterious, score: 0;Polyphen-2: impact: benign, score: 0.433	Missense_Mutation	SNP	diploid	1	.	.	.	7	55224310	55224310	C	T	7:g.55224310C>T	ENST00000275493.2:c.1091C>T	0.18		19	86		162	15825	2020-09-28
Skin Cutaneous Melanoma (TCGA, PanCancer Atlas)	TCGA-FW-A3R5-06	Cutaneous Melanoma	P934S	OncoKB: Unknown, level NA;CIViC: NA;MyCancerGenome: not present;CancerHotspot: no;3DHotspot: no	MutationAssessor: impact: low, score: 1.545;SIFT: impact: deleterious, score: 0.03;Polyphen-2: impact: possibly_damaging, score: 0.46	Missense_Mutation	SNP	diploid	1	.	.	.	7	55266508	55266508	C	T	7:g.55266508C>T	ENST00000275493.2:c.2800C>T	0.21		16	61		105	15825	23/28	3.18134e-05	584698	rs575565383
Skin Cutaneous Melanoma (TCGA, PanCancer Atlas)	TCGA-FW-A3R5-06	Cutaneous Melanoma	R958C	OncoKB: Unknown, level NA;CIViC: NA;MyCancerGenome: not present;CancerHotspot: no;3DHotspot: no	MutationAssessor: impact: high, score: 4.495;SIFT: impact: deleterious, score: 0;Polyphen-2: impact: probably_damaging, score: 1	Missense_Mutation	SNP	diploid	1	.	.	.	7	55268032	55268032	C	T	7:g.55268032C>T	ENST00000275493.2:c.2872C>T	0.21		32	117		160	15825	24/28
Skin Cutaneous Melanoma (TCGA, PanCancer Atlas)	TCGA-FW-A3R5-06	Cutaneous Melanoma	D303N	OncoKB: Unknown, level NA;CIViC: NA;MyCancerGenome: not present;CancerHotspot: no;3DHotspot: no	MutationAssessor: impact: low, score: 1.815;SIFT: impact: deleterious, score: 0.01;Polyphen-2: impact: possibly_damaging, score: 0.724	Missense_Mutation	SNP	diploid	2	.	.	.	7	55223540	55223540	G	A	7:g.55223540G>A	ENST00000275493.2:c.907G>A	0.17		20	97		116	15825	2020-08-28
Skin Cutaneous Melanoma (TCGA, PanCancer Atlas)	TCGA-ER-A42L-06	Cutaneous Melanoma	T594I	OncoKB: Unknown, level NA;CIViC: NA;MyCancerGenome: not present;CancerHotspot: no;3DHotspot: no	MutationAssessor: impact: low, score: 1.885;SIFT: impact: deleterious, score: 0.01;Polyphen-2: impact: benign, score: 0.157	Missense_Mutation	SNP	gain		.	.	.	7	55233031	55233031	C	T	7:g.55233031C>T	ENST00000275493.2:c.1781C>T	0.09		10	97		88	763	15/28	3.97703e-06		rs778011429
Skin Cutaneous Melanoma (TCGA, PanCancer Atlas)	TCGA-D3-A8GB-06	Cutaneous Melanoma	S116F	OncoKB: Likely Neutral, level NA;CIViC: NA;MyCancerGenome: not present;CancerHotspot: no;3DHotspot: no	MutationAssessor: impact: neutral, score: 0.37;SIFT: impact: tolerated, score: 0.06;Polyphen-2: impact: benign, score: 0.005	Missense_Mutation	SNP	gain		.	.	.	7	55211104	55211104	C	T	7:g.55211104C>T	ENST00000275493.2:c.347C>T	0.11		8	67		82	857	2020-03-28
Skin Cutaneous Melanoma (TCGA, PanCancer Atlas)	TCGA-EE-A2MF-06	Cutaneous Melanoma	S116F	OncoKB: Likely Neutral, level NA;CIViC: NA;MyCancerGenome: not present;CancerHotspot: no;3DHotspot: no	MutationAssessor: impact: neutral, score: 0.37;SIFT: impact: tolerated, score: 0.06;Polyphen-2: impact: benign, score: 0.005	Missense_Mutation	SNP	diploid		.	.	.	7	55211104	55211104	C	T	7:g.55211104C>T	ENST00000275493.2:c.347C>T	0.44		63	80		85	620	2020-03-28
Skin Cutaneous Melanoma (TCGA, PanCancer Atlas)	TCGA-GN-A269-01	Cutaneous Melanoma	N234S	OncoKB: Unknown, level NA;CIViC: NA;MyCancerGenome: not present;CancerHotspot: no;3DHotspot: no	MutationAssessor: impact: neutral, score: -0.505;SIFT: impact: tolerated, score: 0.26;Polyphen-2: impact: benign, score: 0.003	Missense_Mutation	SNP		1	.	.	.	7	55220311	55220311	A	G	7:g.55220311A>G	ENST00000275493.2:c.701A>G	0.14		20	127		58	587	2020-06-28
Skin Cutaneous Melanoma (TCGA, PanCancer Atlas)	TCGA-FR-A726-01	Cutaneous Melanoma	L782F	OncoKB: Unknown, level NA;CIViC: NA;MyCancerGenome: not present;CancerHotspot: no;3DHotspot: no	MutationAssessor: impact: low, score: 1.21;SIFT: impact: deleterious, score: 0;Polyphen-2: impact: probably_damaging, score: 0.993	Missense_Mutation	SNP		1	.	.	.	7	55249046	55249046	C	T	7:g.55249046C>T	ENST00000275493.2:c.2344C>T	0.32		55	116		160	5858	20/28
Skin Cutaneous Melanoma (TCGA, PanCancer Atlas)	TCGA-FR-A726-01	Cutaneous Melanoma	P699L	OncoKB: Unknown, level NA;CIViC: NA;MyCancerGenome: not present;CancerHotspot: no;3DHotspot: no	MutationAssessor: impact: medium, score: 2.94;SIFT: impact: deleterious, score: 0;Polyphen-2: impact: probably_damaging, score: 0.94	Missense_Mutation	SNP		3	.	.	.	7	55241648	55241648	C	T	7:g.55241648C>T	ENST00000275493.2:c.2096C>T	0.36		70	123		149	5858	18/28
Skin Cutaneous Melanoma (TCGA, PanCancer Atlas)	TCGA-FR-A726-01	Cutaneous Melanoma	G917R	OncoKB: Unknown, level NA;CIViC: NA;MyCancerGenome: not present;CancerHotspot: no;3DHotspot: no	MutationAssessor: impact: low, score: 1.305;SIFT: impact: deleterious, score: 0;Polyphen-2: impact: probably_damaging, score: 0.99	Missense_Mutation	SNP		2	.	.	.	7	55266457	55266457	G	A	7:g.55266457G>A	ENST00000275493.2:c.2749G>A	0.27		36	99		122	5858	23/28	4.37407e-05		rs775695605
Skin Cutaneous Melanoma (TCGA, PanCancer Atlas)	TCGA-FR-A726-01	Cutaneous Melanoma	M650I	OncoKB: Unknown, level NA;CIViC: NA;MyCancerGenome: not present;CancerHotspot: no;3DHotspot: no	MutationAssessor: impact: neutral, score: -1.79;SIFT: impact: tolerated, score: 0.18;Polyphen-2: impact: benign, score: 0	Missense_Mutation	SNP			.	.	.	7	55240706	55240706	G	A	7:g.55240706G>A	ENST00000275493.2:c.1950G>A	0.29		39	94		110	5858	17/28
Skin Cutaneous Melanoma (TCGA, PanCancer Atlas)	TCGA-EB-A431-01	Cutaneous Melanoma	S227F	OncoKB: Unknown, level NA;CIViC: NA;MyCancerGenome: not present;CancerHotspot: no;3DHotspot: no	MutationAssessor: impact: low, score: 1.91;SIFT: impact: tolerated, score: 0.65;Polyphen-2: impact: benign, score: 0.036	Missense_Mutation	SNP		1	.	.	.	7	55220290	55220290	C	T	7:g.55220290C>T	ENST00000275493.2:c.680C>T	0.38		85	137		156	1397	2020-06-28	3.98705e-06		rs1046438724
Skin Cutaneous Melanoma (TCGA, PanCancer Atlas)	TCGA-FR-A8YC-06	Cutaneous Melanoma	P228L	OncoKB: Unknown, level NA;CIViC: NA;MyCancerGenome: not present;CancerHotspot: no;3DHotspot: no	MutationAssessor: impact: medium, score: 2.955;SIFT: impact: tolerated, score: 0.07;Polyphen-2: impact: probably_damaging, score: 0.969	Missense_Mutation	SNP	gain		.	.	.	7	55220293	55220293	C	T	7:g.55220293C>T	ENST00000275493.2:c.683C>T	0.26		59	171		131	2483	2020-06-28
Skin Cutaneous Melanoma (TCGA, PanCancer Atlas)	TCGA-BF-A1PU-01	Cutaneous Melanoma	P934H	OncoKB: Unknown, level NA;CIViC: NA;MyCancerGenome: not present;CancerHotspot: no;3DHotspot: no	MutationAssessor: impact: medium, score: 2.48;SIFT: impact: deleterious, score: 0;Polyphen-2: impact: probably_damaging, score: 0.994	Missense_Mutation	SNP		1	.	.	.	7	55266509	55266509	C	A	7:g.55266509C>A	ENST00000275493.2:c.2801C>A	0.1		6	52		69	1436	23/28
Skin Cutaneous Melanoma (TCGA, PanCancer Atlas)	TCGA-D3-A2JP-06	Cutaneous Melanoma	H370N	OncoKB: Unknown, level NA;CIViC: NA;MyCancerGenome: not present;CancerHotspot: no;3DHotspot: no	MutationAssessor: impact: low, score: 1.085;SIFT: impact: tolerated, score: 0.33;Polyphen-2: impact: benign, score: 0.19	Missense_Mutation	SNP	gain		.	.	.	7	55224327	55224327	C	A	7:g.55224327C>A	ENST00000275493.2:c.1108C>A	0.1		6	54		60	4149	2020-09-28
Skin Cutaneous Melanoma (TCGA, PanCancer Atlas)	TCGA-D3-A2JP-06	Cutaneous Melanoma	Q982H	OncoKB: Unknown, level NA;CIViC: NA;MyCancerGenome: not present;CancerHotspot: no;3DHotspot: no	MutationAssessor: impact: medium, score: 3.365;SIFT: impact: deleterious, score: 0;Polyphen-2: impact: possibly_damaging, score: 0.863	Missense_Mutation	SNP	gain		.	.	.	7	55268106	55268106	G	T	7:g.55268106G>T	ENST00000275493.2:c.2946G>T	0.09		4	41		53	4149	24/28
Skin Cutaneous Melanoma (TCGA, PanCancer Atlas)	TCGA-EE-A3AC-06	Cutaneous Melanoma	P934T	OncoKB: Unknown, level NA;CIViC: NA;MyCancerGenome: not present;CancerHotspot: no;3DHotspot: no	MutationAssessor: impact: low, score: 1.35;SIFT: impact: deleterious, score: 0;Polyphen-2: impact: probably_damaging, score: 0.925	Missense_Mutation	SNP	diploid	1	.	.	.	7	55266508	55266508	C	A	7:g.55266508C>A	ENST00000275493.2:c.2800C>A	0.09		4	41		82	1865	23/28
Skin Cutaneous Melanoma (TCGA, PanCancer Atlas)	TCGA-FS-A1Z0-06	Cutaneous Melanoma	L1198I	OncoKB: Unknown, level NA;CIViC: NA;MyCancerGenome: not present;CancerHotspot: no;3DHotspot: no	MutationAssessor: impact: medium, score: 2.125;SIFT: impact: deleterious, score: 0;Polyphen-2: impact: probably_damaging, score: 0.991	Missense_Mutation	SNP	diploid		.	.	.	7	55273269	55273269	C	A	7:g.55273269C>A	ENST00000275493.2:c.3592C>A	0.1		4	37		55	1066	28/28
Skin Cutaneous Melanoma (TCGA, PanCancer Atlas)	TCGA-WE-AAA4-06	Cutaneous Melanoma	S464P	OncoKB: Unknown, level NA;CIViC: NA;MyCancerGenome: not present;CancerHotspot: no;3DHotspot: no	MutationAssessor: impact: medium, score: 2.555;SIFT: impact: tolerated, score: 0.2;Polyphen-2: impact: possibly_damaging, score: 0.562	Missense_Mutation	SNP	diploid		.	.	.	7	55227923	55227923	T	C	7:g.55227923T>C	ENST00000275493.2:c.1390T>C	0.12		8	61		38	200	2020-12-28
Stomach Adenocarcinoma (TCGA, PanCancer Atlas)	TCGA-BR-A4QL-01	Stomach Adenocarcinoma	T638M	OncoKB: Unknown, level NA;CIViC: NA;MyCancerGenome: not present;CancerHotspot: no;3DHotspot: no	MutationAssessor: impact: low, score: 1.1;SIFT: impact: tolerated, score: 0.11;Polyphen-2: impact: benign, score: 0	Missense_Mutation	SNP	diploid	2	.	.	.	7	55238900	55238900	C	T	7:g.55238900C>T	ENST00000275493.2:c.1913C>T	0.29		17	42		81	1705	16/28	2.38582e-05		rs571064657
Stomach Adenocarcinoma (TCGA, PanCancer Atlas)	TCGA-BR-7851-01	Intestinal Type Stomach Adenocarcinoma	P937L	OncoKB: Unknown, level NA;CIViC: NA;MyCancerGenome: not present;CancerHotspot: no;3DHotspot: no	MutationAssessor: impact: low, score: 1.52;SIFT: impact: tolerated, score: 0.1;Polyphen-2: impact: benign, score: 0.305	Missense_Mutation	SNP	diploid	1	.	.	.	7	55266518	55266518	C	T	7:g.55266518C>T	ENST00000275493.2:c.2810C>T	0.21		12	45		70	1309	23/28
Stomach Adenocarcinoma (TCGA, PanCancer Atlas)	TCGA-CD-A4MG-01	Diffuse Type Stomach Adenocarcinoma	T430I	OncoKB: Unknown, level NA;CIViC: NA;MyCancerGenome: not present;CancerHotspot: no;3DHotspot: no	MutationAssessor: impact: medium, score: 2.365;SIFT: impact: tolerated, score: 0.21;Polyphen-2: impact: benign, score: 0.282	Missense_Mutation	SNP	gain	1	.	.	.	7	55225437	55225437	C	T	7:g.55225437C>T	ENST00000275493.2:c.1289C>T	0.24		18	56		67	2187	2020-11-28
Stomach Adenocarcinoma (TCGA, PanCancer Atlas)	TCGA-CD-A4MI-01	Stomach Adenocarcinoma	I351V	OncoKB: Unknown, level NA;CIViC: NA;MyCancerGenome: not present;CancerHotspot: no;3DHotspot: no	MutationAssessor: impact: neutral, score: 0.395;SIFT: impact: tolerated, score: 1;Polyphen-2: impact: benign, score: 0	Missense_Mutation	SNP	diploid	1	.	.	.	7	55224270	55224270	A	G	7:g.55224270A>G	ENST00000275493.2:c.1051A>G	0.14		20	126		81	918	2020-09-28	1.98813e-05		rs767790289
Stomach Adenocarcinoma (TCGA, PanCancer Atlas)	TCGA-CG-5721-01	Intestinal Type Stomach Adenocarcinoma	D247N	OncoKB: Unknown, level NA;CIViC: NA;MyCancerGenome: not present;CancerHotspot: no;3DHotspot: no	MutationAssessor: impact: low, score: 1.58;SIFT: impact: deleterious, score: 0.02;Polyphen-2: impact: possibly_damaging, score: 0.643	Missense_Mutation	SNP	diploid	1	.	.	.	7	55220349	55220349	G	A	7:g.55220349G>A	ENST00000275493.2:c.739G>A	0.13	0.0096	9	60	1	103	3725	2020-06-28	1.59926e-05		rs780001754
Stomach Adenocarcinoma (TCGA, PanCancer Atlas)	TCGA-F1-6177-01	Stomach Adenocarcinoma	R1031Q	OncoKB: Unknown, level NA;CIViC: NA;MyCancerGenome: not present;CancerHotspot: no;3DHotspot: no	MutationAssessor: impact: medium, score: 2.535;SIFT: impact: tolerated, score: 0.16;Polyphen-2: impact: possibly_damaging, score: 0.862	Missense_Mutation	SNP	gain	1	.	.	.	7	55269026	55269026	G	A	7:g.55269026G>A	ENST00000275493.2:c.3092G>A	0.31		44	99		100	1198	25/28	3.58172e-05		rs570295933
Stomach Adenocarcinoma (TCGA, PanCancer Atlas)	TCGA-VQ-A8P2-01	Mucinous Stomach Adenocarcinoma	P644L	OncoKB: Unknown, level NA;CIViC: NA;MyCancerGenome: not present;CancerHotspot: no;3DHotspot: no	MutationAssessor: impact: medium, score: 2.515;SIFT: impact: tolerated, score: 0.07;Polyphen-2: impact: benign, score: 0.138	Missense_Mutation	SNP	diploid		.	.	.	7	55240687	55240687	C	T	7:g.55240687C>T	ENST00000275493.2:c.1931C>T	0.36		22	39		68	6366	17/28	2.79796e-05	360463	rs770443325
Stomach Adenocarcinoma (TCGA, PanCancer Atlas)	TCGA-B7-A5TI-01	Diffuse Type Stomach Adenocarcinoma	A920S	OncoKB: Unknown, level NA;CIViC: NA;MyCancerGenome: not present;CancerHotspot: no;3DHotspot: no	MutationAssessor: impact: low, score: 1.11;SIFT: impact: deleterious, score: 0.02;Polyphen-2: impact: probably_damaging, score: 0.909	Missense_Mutation	SNP	diploid		.	.	.	7	55266466	55266466	G	T	7:g.55266466G>T	ENST00000275493.2:c.2758G>T	0.28		32	83		87	551	23/28
Stomach Adenocarcinoma (TCGA, PanCancer Atlas)	TCGA-BR-4256-01	Stomach Adenocarcinoma	V323I	OncoKB: Unknown, level NA;CIViC: NA;MyCancerGenome: not present;CancerHotspot: no;3DHotspot: no	MutationAssessor: impact: neutral, score: 0.71;SIFT: impact: tolerated, score: 1;Polyphen-2: impact: benign, score: 0.001	Missense_Mutation	SNP	diploid	2	.	.	.	7	55223600	55223600	G	A	7:g.55223600G>A	ENST00000275493.2:c.967G>A	0.18		4	18		33	954	2020-08-28	7.96768e-06		rs761844164
Stomach Adenocarcinoma (TCGA, PanCancer Atlas)	TCGA-RD-A7BT-01	Intestinal Type Stomach Adenocarcinoma	G239S	OncoKB: Unknown, level NA;CIViC: NA;MyCancerGenome: not present;CancerHotspot: no;3DHotspot: no	MutationAssessor: impact: medium, score: 2.13;SIFT: impact: deleterious, score: 0;Polyphen-2: impact: probably_damaging, score: 0.994	Missense_Mutation	SNP	gain		.	.	.	7	55220325	55220325	G	A	7:g.55220325G>A	ENST00000275493.2:c.715G>A	0.09		14	135		135	213	2020-06-28
Stomach Adenocarcinoma (TCGA, PanCancer Atlas)	TCGA-VQ-A91D-01	Intestinal Type Stomach Adenocarcinoma	F1151L	OncoKB: Unknown, level NA;CIViC: NA;MyCancerGenome: not present;CancerHotspot: no;3DHotspot: no	MutationAssessor: impact: low, score: 1.22;SIFT: impact: tolerated, score: 0.16;Polyphen-2: impact: benign, score: 0	Missense_Mutation	SNP	gain		.	.	.	7	55273130	55273130	C	A	7:g.55273130C>A	ENST00000275493.2:c.3453C>A	0.57		21	16		46	2139	28/28
Stomach Adenocarcinoma (TCGA, PanCancer Atlas)	TCGA-VQ-A8PX-01	Intestinal Type Stomach Adenocarcinoma	R224H	OncoKB: Unknown, level NA;CIViC: NA;MyCancerGenome: not present;CancerHotspot: no;3DHotspot: no	MutationAssessor: impact: low, score: 1.915;SIFT: impact: tolerated, score: 0.15;Polyphen-2: impact: possibly_damaging, score: 0.731	Missense_Mutation	SNP	diploid		.	.	.	7	55220281	55220281	G	A	7:g.55220281G>A	ENST00000275493.2:c.671G>A	0.11		19	150		157	549	2020-06-28	3.18791e-05		rs759106015
Testicular Germ Cell Tumors (TCGA, PanCancer Atlas)	TCGA-XE-AANI-01	Mixed Germ Cell Tumor	P1178L	OncoKB: Unknown, level NA;CIViC: NA;MyCancerGenome: not present;CancerHotspot: no;3DHotspot: no	MutationAssessor: impact: medium, score: 2.125;SIFT: impact: deleterious, score: 0;Polyphen-2: impact: possibly_damaging, score: 0.796	Missense_Mutation	SNP	diploid	1	.	.	.	7	55273210	55273210	C	T	7:g.55273210C>T	ENST00000275493.2:c.3533C>T	0.23		35	118		129	21	28/28
Uterine Corpus Endometrial Carcinoma (TCGA, PanCancer Atlas)	TCGA-AX-A06F-01	Uterine Endometrioid Carcinoma	C636Y	OncoKB: Unknown, level NA;CIViC: NA;MyCancerGenome: not present;CancerHotspot: no;3DHotspot: no	MutationAssessor: impact: high, score: 4.245;SIFT: impact: deleterious, score: 0.01;Polyphen-2: impact: probably_damaging, score: 0.997	Missense_Mutation	SNP	diploid	2	.	.	.	7	55238894	55238894	G	A	7:g.55238894G>A	ENST00000275493.2:c.1907G>A	0.34		48	95		81	7282	16/28
Uterine Corpus Endometrial Carcinoma (TCGA, PanCancer Atlas)	TCGA-DF-A2L0-01	Uterine Endometrioid Carcinoma	V536M	OncoKB: Unknown, level NA;CIViC: NA;MyCancerGenome: not present;CancerHotspot: no;3DHotspot: no	MutationAssessor: impact: medium, score: 2.57;SIFT: impact: deleterious, score: 0.01;Polyphen-2: impact: probably_damaging, score: 0.918	Missense_Mutation	SNP	shallowdel	1	.	.	.	7	55229299	55229299	G	A	7:g.55229299G>A	ENST00000275493.2:c.1606G>A	0.37		30	52		49	44	13/28	1.59056e-05		rs767193132
Uterine Corpus Endometrial Carcinoma (TCGA, PanCancer Atlas)	TCGA-AP-A051-01	Uterine Endometrioid Carcinoma	V441I	OncoKB: Unknown, level NA;CIViC: NA;MyCancerGenome: not present;CancerHotspot: no;3DHotspot: no	MutationAssessor: impact: low, score: 1.51;SIFT: impact: tolerated, score: 0.21;Polyphen-2: impact: benign, score: 0.01	Missense_Mutation	SNP	diploid	1	.	.	.	7	55227854	55227854	G	A	7:g.55227854G>A	ENST00000275493.2:c.1321G>A	0.2		15	61		169	8312	2020-12-28	3.97747e-06		rs1166858113
Uterine Corpus Endometrial Carcinoma (TCGA, PanCancer Atlas)	TCGA-AP-A059-01	Uterine Endometrioid Carcinoma	S198R	OncoKB: Likely Neutral, level NA;CIViC: NA;MyCancerGenome: not present;CancerHotspot: no;3DHotspot: no	MutationAssessor: impact: neutral, score: 0.45;SIFT: impact: tolerated, score: 0.63;Polyphen-2: impact: benign, score: 0.233	Missense_Mutation	SNP	diploid	1	.	.	.	7	55219021	55219021	C	A	7:g.55219021C>A	ENST00000275493.2:c.594C>A	0.21		57	211		272	10939	2020-05-28
Uterine Corpus Endometrial Carcinoma (TCGA, PanCancer Atlas)	TCGA-AP-A059-01	Uterine Endometrioid Carcinoma	L541I	OncoKB: Unknown, level NA;CIViC: NA;MyCancerGenome: not present;CancerHotspot: no;3DHotspot: no	MutationAssessor: impact: neutral, score: 0.18;SIFT: impact: tolerated, score: 0.64;Polyphen-2: impact: benign, score: 0	Missense_Mutation	SNP	diploid	2	.	.	.	7	55229314	55229314	C	A	7:g.55229314C>A	ENST00000275493.2:c.1621C>A	0.28		34	89		137	10939	13/28
Uterine Corpus Endometrial Carcinoma (TCGA, PanCancer Atlas)	TCGA-AP-A059-01	Uterine Endometrioid Carcinoma	L1167M	OncoKB: Unknown, level NA;CIViC: NA;MyCancerGenome: not present;CancerHotspot: no;3DHotspot: no	MutationAssessor: impact: medium, score: 2.02;SIFT: impact: tolerated, score: 0.12;Polyphen-2: impact: probably_damaging, score: 0.929	Missense_Mutation	SNP	diploid	1	.	.	.	7	55273176	55273176	C	A	7:g.55273176C>A	ENST00000275493.2:c.3499C>A	0.15		14	79		146	10939	28/28
Uterine Corpus Endometrial Carcinoma (TCGA, PanCancer Atlas)	TCGA-AP-A0LM-01	Uterine Endometrioid Carcinoma	S437Y	OncoKB: Unknown, level NA;CIViC: NA;MyCancerGenome: not present;CancerHotspot: no;3DHotspot: no	MutationAssessor: impact: high, score: 3.655;SIFT: impact: deleterious, score: 0.01;Polyphen-2: impact: probably_damaging, score: 0.997	Missense_Mutation	SNP	diploid	1	.	.	.	7	55227843	55227843	C	A	7:g.55227843C>A	ENST00000275493.2:c.1310C>A	0.28		44	116		187	13187	2020-12-28
Uterine Corpus Endometrial Carcinoma (TCGA, PanCancer Atlas)	TCGA-B5-A0JZ-01	Uterine Endometrioid Carcinoma	P694S	OncoKB: Unknown, level NA;CIViC: NA;MyCancerGenome: not present;CancerHotspot: no;3DHotspot: no	MutationAssessor: impact: medium, score: 2.995;SIFT: impact: deleterious, score: 0;Polyphen-2: impact: probably_damaging, score: 0.994	Missense_Mutation	SNP	diploid	5	.	.	.	7	55241632	55241632	C	T	7:g.55241632C>T	ENST00000275493.2:c.2080C>T	0.28		23	58		141	497	18/28
Uterine Corpus Endometrial Carcinoma (TCGA, PanCancer Atlas)	TCGA-BS-A0UV-01	Uterine Endometrioid Carcinoma	L140V	OncoKB: Unknown, level NA;CIViC: NA;MyCancerGenome: not present;CancerHotspot: no;3DHotspot: no	MutationAssessor: impact: high, score: 3.655;SIFT: impact: deleterious, score: 0;Polyphen-2: impact: probably_damaging, score: 0.983	Missense_Mutation	SNP	diploid	1	.	.	.	7	55211175	55211175	T	G	7:g.55211175T>G	ENST00000275493.2:c.418T>G	0.35		36	66		256	8968	2020-03-28
Uterine Corpus Endometrial Carcinoma (TCGA, PanCancer Atlas)	TCGA-D1-A15W-01	Uterine Endometrioid Carcinoma	G917A	OncoKB: Unknown, level NA;CIViC: NA;MyCancerGenome: not present;CancerHotspot: no;3DHotspot: no	MutationAssessor: impact: low, score: 1.425;SIFT: impact: deleterious, score: 0.03;Polyphen-2: impact: benign, score: 0.269	Missense_Mutation	SNP	diploid	2	.	.	.	7	55266458	55266458	G	C	7:g.55266458G>C	ENST00000275493.2:c.2750G>C	0.32		58	123		121	66	23/28
Uterine Corpus Endometrial Carcinoma (TCGA, PanCancer Atlas)	TCGA-A5-A0G2-01	Uterine Serous Carcinoma/Uterine Papillary Serous Carcinoma	A743T	OncoKB: Likely Neutral, level NA;CIViC: NA;MyCancerGenome: not present;CancerHotspot: no;3DHotspot: no	MutationAssessor: impact: medium, score: 3.315;SIFT: impact: deleterious, score: 0;Polyphen-2: impact: probably_damaging, score: 0.998	Missense_Mutation	SNP	diploid	4	.	.	.	7	55242457	55242457	G	A	7:g.55242457G>A	ENST00000275493.2:c.2227G>A	0.13		7	46		75	25712	19/28	1.1929e-05		rs759256622
Uterine Corpus Endometrial Carcinoma (TCGA, PanCancer Atlas)	TCGA-A5-A0G2-01	Uterine Serous Carcinoma/Uterine Papillary Serous Carcinoma	G428S	OncoKB: Unknown, level NA;CIViC: NA;MyCancerGenome: not present;CancerHotspot: no;3DHotspot: no	MutationAssessor: impact: high, score: 3.94;SIFT: impact: deleterious, score: 0;Polyphen-2: impact: probably_damaging, score: 1	Missense_Mutation	SNP	diploid	1	.	.	.	7	55225430	55225430	G	A	7:g.55225430G>A	ENST00000275493.2:c.1282G>A	0.12		9	69		87	25712	2020-11-28
Uterine Corpus Endometrial Carcinoma (TCGA, PanCancer Atlas)	TCGA-A5-A0G2-01	Uterine Serous Carcinoma/Uterine Papillary Serous Carcinoma	R977H	OncoKB: Unknown, level NA;CIViC: NA;MyCancerGenome: not present;CancerHotspot: no;3DHotspot: no	MutationAssessor: impact: medium, score: 2.095;SIFT: impact: deleterious, score: 0;Polyphen-2: impact: probably_damaging, score: 0.99	Missense_Mutation	SNP	diploid		.	.	.	7	55268090	55268090	G	A	7:g.55268090G>A	ENST00000275493.2:c.2930G>A	0.24		68	219		331	25712	24/28	1.19298e-05		rs745490627
Uterine Corpus Endometrial Carcinoma (TCGA, PanCancer Atlas)	TCGA-AP-A1DK-01	Uterine Endometrioid Carcinoma	R977H	OncoKB: Unknown, level NA;CIViC: NA;MyCancerGenome: not present;CancerHotspot: no;3DHotspot: no	MutationAssessor: impact: medium, score: 2.095;SIFT: impact: deleterious, score: 0;Polyphen-2: impact: probably_damaging, score: 0.99	Missense_Mutation	SNP	diploid		.	.	.	7	55268090	55268090	G	A	7:g.55268090G>A	ENST00000275493.2:c.2930G>A	0.31		24	53		91	10312	24/28	1.19298e-05		rs745490627
Uterine Corpus Endometrial Carcinoma (TCGA, PanCancer Atlas)	TCGA-AX-A1CE-01	Uterine Endometrioid Carcinoma	Q684H	OncoKB: Unknown, level NA;CIViC: NA;MyCancerGenome: not present;CancerHotspot: no;3DHotspot: no	MutationAssessor: impact: medium, score: 2.8;SIFT: impact: deleterious, score: 0.02;Polyphen-2: impact: probably_damaging, score: 0.968	Missense_Mutation	SNP	diploid		.	.	.	7	55240808	55240808	G	T	7:g.55240808G>T	ENST00000275493.2:c.2052G>T	0.53		9	8		15	11440	17/28
Uterine Corpus Endometrial Carcinoma (TCGA, PanCancer Atlas)	TCGA-EO-A22R-01	Uterine Endometrioid Carcinoma	L469V	OncoKB: Unknown, level NA;CIViC: NA;MyCancerGenome: not present;CancerHotspot: no;3DHotspot: no	MutationAssessor: impact: high, score: 4.24;SIFT: impact: deleterious, score: 0;Polyphen-2: impact: probably_damaging, score: 1	Missense_Mutation	SNP	diploid		.	.	.	7	55227938	55227938	T	G	7:g.55227938T>G	ENST00000275493.2:c.1405T>G	0.47		23	26		51	12771	2020-12-28
Uterine Corpus Endometrial Carcinoma (TCGA, PanCancer Atlas)	TCGA-EO-A22U-01	Uterine Endometrioid Carcinoma	P389S	OncoKB: Unknown, level NA;CIViC: NA;MyCancerGenome: not present;CancerHotspot: no;3DHotspot: no	MutationAssessor: impact: medium, score: 2.285;SIFT: impact: deleterious, score: 0.03;Polyphen-2: impact: probably_damaging, score: 0.914	Missense_Mutation	SNP	diploid		.	.	.	7	55224483	55224483	C	T	7:g.55224483C>T	ENST00000275493.2:c.1165C>T	0.44		31	40		53	13829	2020-10-28
Uterine Corpus Endometrial Carcinoma (TCGA, PanCancer Atlas)	TCGA-EO-A22U-01	Uterine Endometrioid Carcinoma	T678M	OncoKB: Unknown, level NA;CIViC: NA;MyCancerGenome: not present;CancerHotspot: no;3DHotspot: no	MutationAssessor: impact: medium, score: 2.865;SIFT: impact: deleterious, score: 0;Polyphen-2: impact: probably_damaging, score: 0.996	Missense_Mutation	SNP	diploid		.	.	.	7	55240789	55240789	C	T	7:g.55240789C>T	ENST00000275493.2:c.2033C>T	0.52		31	29		22	13829	17/28	1.61332e-05	584694	rs138193597
Uterine Corpus Endometrial Carcinoma (TCGA, PanCancer Atlas)	TCGA-A5-A0G1-01	Uterine Serous Carcinoma/Uterine Papillary Serous Carcinoma	D1084N	OncoKB: Unknown, level NA;CIViC: NA;MyCancerGenome: not present;CancerHotspot: no;3DHotspot: no	MutationAssessor: impact: medium, score: 2.965;SIFT: impact: tolerated, score: 0.09;Polyphen-2: impact: benign, score: 0.073	Missense_Mutation	SNP	diploid		.	.	.	7	55270297	55270297	G	A	7:g.55270297G>A	ENST00000275493.2:c.3250G>A	0.23		10	33		111	10820	27/28	4.01046e-06		rs535060253
Uterine Corpus Endometrial Carcinoma (TCGA, PanCancer Atlas)	TCGA-A5-A0G2-01	Uterine Serous Carcinoma/Uterine Papillary Serous Carcinoma	N444S	OncoKB: Unknown, level NA;CIViC: NA;MyCancerGenome: not present;CancerHotspot: no;3DHotspot: no	MutationAssessor: impact: neutral, score: 0.255;SIFT: impact: tolerated, score: 0.54;Polyphen-2: impact: benign, score: 0	Missense_Mutation	SNP	diploid		.	.	.	7	55227864	55227864	A	G	7:g.55227864A>G	ENST00000275493.2:c.1331A>G	0.42		43	59		83	25712	2020-12-28	3.97709e-06		rs1032006770
Uterine Corpus Endometrial Carcinoma (TCGA, PanCancer Atlas)	TCGA-A5-A0G2-01	Uterine Serous Carcinoma/Uterine Papillary Serous Carcinoma	C506Y	OncoKB: Unknown, level NA;CIViC: NA;MyCancerGenome: not present;CancerHotspot: no;3DHotspot: no	MutationAssessor: impact: high, score: 4.445;SIFT: impact: deleterious, score: 0;Polyphen-2: impact: probably_damaging, score: 1	Missense_Mutation	SNP	diploid		.	.	.	7	55229210	55229210	G	A	7:g.55229210G>A	ENST00000275493.2:c.1517G>A	0.21		13	48		50	25712	13/28
Uterine Corpus Endometrial Carcinoma (TCGA, PanCancer Atlas)	TCGA-A5-A0G2-01	Uterine Serous Carcinoma/Uterine Papillary Serous Carcinoma	I706L	OncoKB: Unknown, level NA;CIViC: NA;MyCancerGenome: not present;CancerHotspot: no;3DHotspot: no	MutationAssessor: impact: medium, score: 2.98;SIFT: impact: deleterious, score: 0.02;Polyphen-2: impact: benign, score: 0.3	Missense_Mutation	SNP	diploid		.	.	.	7	55241668	55241668	A	C	7:g.55241668A>C	ENST00000275493.2:c.2116A>C	0.13		12	81		70	25712	18/28
Uterine Corpus Endometrial Carcinoma (TCGA, PanCancer Atlas)	TCGA-AP-A1DK-01	Uterine Endometrioid Carcinoma	I82V	OncoKB: Unknown, level NA;CIViC: NA;MyCancerGenome: not present;CancerHotspot: no;3DHotspot: no	MutationAssessor: impact: medium, score: 2.105;SIFT: impact: deleterious, score: 0.02;Polyphen-2: impact: possibly_damaging, score: 0.703	Missense_Mutation	SNP	diploid		.	.	.	7	55211001	55211001	A	G	7:g.55211001A>G	ENST00000275493.2:c.244A>G	0.35		23	43		70	10312	2020-03-28	3.1839e-05		rs1309796320
Uterine Corpus Endometrial Carcinoma (TCGA, PanCancer Atlas)	TCGA-AP-A1DK-01	Uterine Endometrioid Carcinoma	P560T	OncoKB: Unknown, level NA;CIViC: NA;MyCancerGenome: not present;CancerHotspot: no;3DHotspot: no	MutationAssessor: impact: medium, score: 2.42;SIFT: impact: deleterious, score: 0.01;Polyphen-2: impact: benign, score: 0.332	Missense_Mutation	SNP	diploid		.	.	.	7	55231472	55231472	C	A	7:g.55231472C>A	ENST00000275493.2:c.1678C>A	0.17		4	19		15	10312	14/28	1.193e-05		rs748219780
Uterine Corpus Endometrial Carcinoma (TCGA, PanCancer Atlas)	TCGA-AP-A1DK-01	Uterine Endometrioid Carcinoma	R681M	OncoKB: Unknown, level NA;CIViC: NA;MyCancerGenome: not present;CancerHotspot: no;3DHotspot: no	MutationAssessor: impact: medium, score: 3.005;SIFT: impact: deleterious, score: 0;Polyphen-2: impact: probably_damaging, score: 0.99	Missense_Mutation	SNP	diploid		.	.	.	7	55240798	55240798	G	T	7:g.55240798G>T	ENST00000275493.2:c.2042G>T	0.43		19	25		38	10312	17/28
Uterine Corpus Endometrial Carcinoma (TCGA, PanCancer Atlas)	TCGA-AP-A1DK-01	Uterine Endometrioid Carcinoma	V1147A	OncoKB: Unknown, level NA;CIViC: NA;MyCancerGenome: not present;CancerHotspot: no;3DHotspot: no	MutationAssessor: impact: neutral, score: -0.02;SIFT: impact: tolerated, score: 0.6;Polyphen-2: impact: benign, score: 0	Missense_Mutation	SNP	diploid		.	.	.	7	55273117	55273117	T	C	7:g.55273117T>C	ENST00000275493.2:c.3440T>C	0.44		7	9		14	10312	28/28
Uterine Corpus Endometrial Carcinoma (TCGA, PanCancer Atlas)	TCGA-AP-A1DV-01	Uterine Endometrioid Carcinoma	P848L	OncoKB: Likely Neutral, level NA;CIViC: Predictive: 1;MyCancerGenome: not present;CancerHotspot: no;3DHotspot: no	MutationAssessor: impact: neutral, score: 0.37;SIFT: impact: deleterious, score: 0;Polyphen-2: impact: probably_damaging, score: 1	Missense_Mutation	SNP	diploid	13	.	.	.	7	55259485	55259485	C	T	7:g.55259485C>T	ENST00000275493.2:c.2543C>T	0.56		24	19		38	12063	21/28	0.000389957	45282	rs148934350
Uterine Corpus Endometrial Carcinoma (TCGA, PanCancer Atlas)	TCGA-AX-A06F-01	Uterine Endometrioid Carcinoma	A237D	OncoKB: Unknown, level NA;CIViC: NA;MyCancerGenome: not present;CancerHotspot: no;3DHotspot: no	MutationAssessor: impact: medium, score: 2.625;SIFT: impact: deleterious, score: 0;Polyphen-2: impact: probably_damaging, score: 0.998	Missense_Mutation	SNP	diploid	1	.	.	.	7	55220320	55220320	C	A	7:g.55220320C>A	ENST00000275493.2:c.710C>A	0.41		31	44		62	7282	2020-06-28
Uterine Corpus Endometrial Carcinoma (TCGA, PanCancer Atlas)	TCGA-AX-A0J1-01	Uterine Endometrioid Carcinoma	S1153N	OncoKB: Unknown, level NA;CIViC: NA;MyCancerGenome: not present;CancerHotspot: no;3DHotspot: no	MutationAssessor: impact: neutral, score: -0.135;SIFT: impact: tolerated, score: 1;Polyphen-2: impact: benign, score: 0.021	Missense_Mutation	SNP	diploid	3	.	.	.	7	55273135	55273135	G	A	7:g.55273135G>A	ENST00000275493.2:c.3458G>A	0.07		12	158		129	5126	28/28
Uterine Corpus Endometrial Carcinoma (TCGA, PanCancer Atlas)	TCGA-AX-A1CE-01	Uterine Endometrioid Carcinoma	T259M	OncoKB: Unknown, level NA;CIViC: NA;MyCancerGenome: not present;CancerHotspot: no;3DHotspot: no	MutationAssessor: impact: medium, score: 2.3;SIFT: impact: tolerated, score: 0.1;Polyphen-2: impact: probably_damaging, score: 0.979	Missense_Mutation	SNP	diploid		.	.	.	7	55221732	55221732	C	T	7:g.55221732C>T	ENST00000275493.2:c.776C>T	0.37		22	37		34	11440	2020-07-28	1.19301e-05		rs766478921
Uterine Corpus Endometrial Carcinoma (TCGA, PanCancer Atlas)	TCGA-B5-A11E-01	Uterine Endometrioid Carcinoma	S177P	OncoKB: Unknown, level NA;CIViC: NA;MyCancerGenome: not present;CancerHotspot: no;3DHotspot: no	MutationAssessor: impact: low, score: 1.79;SIFT: impact: tolerated, score: 0.27;Polyphen-2: impact: benign, score: 0.001	Missense_Mutation	SNP	diploid		.	.	.	7	55214403	55214403	T	C	7:g.55214403T>C	ENST00000275493.2:c.529T>C	0.61		17	11		33	9039	2020-04-28
Uterine Corpus Endometrial Carcinoma (TCGA, PanCancer Atlas)	TCGA-B5-A3FC-01	Uterine Endometrioid Carcinoma	P1123S	OncoKB: Unknown, level NA;CIViC: NA;MyCancerGenome: not present;CancerHotspot: no;3DHotspot: no	MutationAssessor: impact: neutral, score: 0.64;SIFT: impact: tolerated, score: 0.52;Polyphen-2: impact: benign, score: 0.001	Missense_Mutation	SNP	diploid		.	.	.	7	55273044	55273044	C	T	7:g.55273044C>T	ENST00000275493.2:c.3367C>T	0.69		11	5		19	12211	28/28
Uterine Corpus Endometrial Carcinoma (TCGA, PanCancer Atlas)	TCGA-D1-A103-01	Uterine Endometrioid Carcinoma	G663V	OncoKB: Unknown, level NA;CIViC: NA;MyCancerGenome: not present;CancerHotspot: no;3DHotspot: no	MutationAssessor: impact: neutral, score: 0.69;SIFT: impact: tolerated, score: 0.54;Polyphen-2: impact: benign, score: 0.005	Missense_Mutation	SNP	diploid		.	.	.	7	55240744	55240744	G	T	7:g.55240744G>T	ENST00000275493.2:c.1988G>T	0.07		4	52		48	6849	17/28
Uterine Corpus Endometrial Carcinoma (TCGA, PanCancer Atlas)	TCGA-D1-A2G5-01	Uterine Endometrioid Carcinoma	T625A	OncoKB: Unknown, level NA;CIViC: NA;MyCancerGenome: not present;CancerHotspot: no;3DHotspot: no	MutationAssessor: impact: low, score: 1.155;SIFT: impact: deleterious, score: 0;Polyphen-2: impact: benign, score: 0.254	Missense_Mutation	SNP	diploid		.	.	.	7	55233123	55233123	A	G	7:g.55233123A>G	ENST00000275493.2:c.1873A>G	0.18		5	23		32	214	15/28
Uterine Corpus Endometrial Carcinoma (TCGA, PanCancer Atlas)	TCGA-DF-A2KN-01	Uterine Endometrioid Carcinoma	A353V	OncoKB: Unknown, level NA;CIViC: NA;MyCancerGenome: not present;CancerHotspot: no;3DHotspot: no	MutationAssessor: impact: medium, score: 3.445;SIFT: impact: deleterious, score: 0.02;Polyphen-2: impact: benign, score: 0.297	Missense_Mutation	SNP	diploid		.	.	.	7	55224277	55224277	C	T	7:g.55224277C>T	ENST00000275493.2:c.1058C>T	0.09		4	39		38	4342	2020-09-28
Uterine Corpus Endometrial Carcinoma (TCGA, PanCancer Atlas)	TCGA-DF-A2KU-01	Uterine Endometrioid Carcinoma	S50N	OncoKB: Unknown, level NA;CIViC: NA;MyCancerGenome: not present;CancerHotspot: no;3DHotspot: no	MutationAssessor: impact: low, score: 1.32;SIFT: impact: tolerated, score: 0.47;Polyphen-2: impact: benign, score: 0.01	Missense_Mutation	SNP	diploid		.	.	.	7	55210039	55210039	G	A	7:g.55210039G>A	ENST00000275493.2:c.149G>A	0.33		20	40		53	10052	2020-02-28
Uterine Corpus Endometrial Carcinoma (TCGA, PanCancer Atlas)	TCGA-DF-A2KU-01	Uterine Endometrioid Carcinoma	A1195T	OncoKB: Unknown, level NA;CIViC: NA;MyCancerGenome: not present;CancerHotspot: no;3DHotspot: no	MutationAssessor: impact: neutral, score: 0.69;SIFT: impact: tolerated, score: 0.11;Polyphen-2: impact: benign, score: 0	Missense_Mutation	SNP	diploid		.	.	.	7	55273260	55273260	G	A	7:g.55273260G>A	ENST00000275493.2:c.3583G>A	0.35		11	20		9	10052	28/28
Uterine Corpus Endometrial Carcinoma (TCGA, PanCancer Atlas)	TCGA-DI-A1BU-01	Uterine Mixed Endometrial Carcinoma	I556V	OncoKB: Unknown, level NA;CIViC: NA;MyCancerGenome: not present;CancerHotspot: no;3DHotspot: no	MutationAssessor: impact: neutral, score: -0.24;SIFT: impact: tolerated, score: 1;Polyphen-2: impact: benign, score: 0	Missense_Mutation	SNP	diploid		.	.	.	7	55231460	55231460	A	G	7:g.55231460A>G	ENST00000275493.2:c.1666A>G	0.27		12	32		14	7642	14/28
Uterine Corpus Endometrial Carcinoma (TCGA, PanCancer Atlas)	TCGA-DI-A1BU-01	Uterine Mixed Endometrial Carcinoma	N1094S	OncoKB: Unknown, level NA;CIViC: NA;MyCancerGenome: not present;CancerHotspot: no;3DHotspot: no	MutationAssessor: impact: medium, score: 2.825;SIFT: impact: deleterious, score: 0;Polyphen-2: impact: benign, score: 0.003	Missense_Mutation	SNP	diploid		.	.	.	7	55272958	55272958	A	G	7:g.55272958A>G	ENST00000275493.2:c.3281A>G	0.35		15	28		32	7642	28/28
Uterine Corpus Endometrial Carcinoma (TCGA, PanCancer Atlas)	TCGA-E6-A1LX-01	Uterine Endometrioid Carcinoma	R531Q	OncoKB: Unknown, level NA;CIViC: NA;MyCancerGenome: not present;CancerHotspot: no;3DHotspot: no	MutationAssessor: impact: low, score: 1.685;SIFT: impact: deleterious, score: 0;Polyphen-2: impact: probably_damaging, score: 0.979	Missense_Mutation	SNP	diploid		.	.	.	7	55229285	55229285	G	A	7:g.55229285G>A	ENST00000275493.2:c.1592G>A	0.16		13	66		74	12691	13/28	1.1929e-05		rs1330512770
Uterine Corpus Endometrial Carcinoma (TCGA, PanCancer Atlas)	TCGA-EO-A22X-01	Uterine Endometrioid Carcinoma	Q163R	OncoKB: Unknown, level NA;CIViC: NA;MyCancerGenome: not present;CancerHotspot: no;3DHotspot: no	MutationAssessor: impact: low, score: 1.75;SIFT: impact: tolerated, score: 0.53;Polyphen-2: impact: benign, score: 0.275	Missense_Mutation	SNP	diploid		.	.	.	7	55214362	55214362	A	G	7:g.55214362A>G	ENST00000275493.2:c.488A>G	0.31		15	33		49	9429	2020-04-28
Uterine Corpus Endometrial Carcinoma (TCGA, PanCancer Atlas)	TCGA-EO-A3B0-01	Uterine Endometrioid Carcinoma	P100H	OncoKB: Unknown, level NA;CIViC: NA;MyCancerGenome: not present;CancerHotspot: no;3DHotspot: no	MutationAssessor: impact: medium, score: 2.68;SIFT: impact: tolerated, score: 0.05;Polyphen-2: impact: possibly_damaging, score: 0.771	Missense_Mutation	SNP	diploid		.	.	.	7	55211056	55211056	C	A	7:g.55211056C>A	ENST00000275493.2:c.299C>A	0.38		27	45		43	10909	2020-03-28			rs376963968
Uterine Corpus Endometrial Carcinoma (TCGA, PanCancer Atlas)	TCGA-EY-A2OM-01	Uterine Endometrioid Carcinoma	D278G	OncoKB: Unknown, level NA;CIViC: NA;MyCancerGenome: not present;CancerHotspot: no;3DHotspot: no	MutationAssessor: impact: medium, score: 2.3;SIFT: impact: tolerated, score: 0.25;Polyphen-2: impact: benign, score: 0.127	Missense_Mutation	SNP	diploid		.	.	.	7	55221789	55221789	A	G	7:g.55221789A>G	ENST00000275493.2:c.833A>G	0.5		27	27		70	623	2020-07-28
Uterine Corpus Endometrial Carcinoma (TCGA, PanCancer Atlas)	TCGA-SL-A6JA-01	Uterine Endometrioid Carcinoma	K852T	OncoKB: Unknown, level NA;CIViC: NA;MyCancerGenome: not present;CancerHotspot: no;3DHotspot: no	MutationAssessor: impact: medium, score: 3.42;SIFT: impact: deleterious, score: 0.01;Polyphen-2: impact: probably_damaging, score: 1	Missense_Mutation	SNP	diploid	2	.	.	.	7	55259497	55259497	A	C	7:g.55259497A>C	ENST00000275493.2:c.2555A>C	0.33		13	26		34	746	21/28
Cervical Squamous Cell Carcinoma (TCGA, PanCancer Atlas)	TCGA-EA-A6QX-01	Cervical Squamous Cell Carcinoma	W731*	OncoKB: Unknown, level NA;CIViC: NA;MyCancerGenome: not present;CancerHotspot: no;3DHotspot: no	MutationAssessor: NA;SIFT: NA;Polyphen-2: NA	Nonsense_Mutation	SNP	diploid	2	.	.	.	7	55242423	55242423	G	A	7:g.55242423G>A	ENST00000275493.2:c.2193G>A	0.3		16	37		50	54	19/28		376275	rs121913467
Colorectal Adenocarcinoma (TCGA, PanCancer Atlas)	TCGA-AG-3881-01	Rectal Adenocarcinoma	G339*	OncoKB: Unknown, level NA;CIViC: NA;MyCancerGenome: not present;CancerHotspot: no;3DHotspot: no	MutationAssessor: NA;SIFT: NA;Polyphen-2: NA	Nonsense_Mutation	SNP	diploid		.	.	.	7	55224234	55224234	G	T	7:g.55224234G>T	ENST00000275493.2:c.1015G>T	0.04		5	126		99	111	2020-09-28
Head and Neck Squamous Cell Carcinoma (TCGA, PanCancer Atlas)	TCGA-P3-A6T5-01	Head and Neck Squamous Cell Carcinoma	S885*	OncoKB: Unknown, level NA;CIViC: NA;MyCancerGenome: not present;CancerHotspot: no;3DHotspot: no	MutationAssessor: NA;SIFT: NA;Polyphen-2: NA	Nonsense_Mutation	SNP	diploid		.	.	.	7	55260487	55260487	C	G	7:g.55260487C>G	ENST00000275493.2:c.2654C>G	0.1		9	81		72	197	22/28
Brain Lower Grade Glioma (TCGA, PanCancer Atlas)	TCGA-FG-A70Z-01	Oligoastrocytoma	Q1143*	OncoKB: Unknown, level NA;CIViC: NA;MyCancerGenome: not present;CancerHotspot: no;3DHotspot: no	MutationAssessor: NA;SIFT: NA;Polyphen-2: NA	Nonsense_Mutation	SNP	amp		.	.	.	7	55273104	55273104	C	T	7:g.55273104C>T	ENST00000275493.2:c.3427C>T	0.86		751	122		104	47	28/28
Lung Adenocarcinoma (TCGA, PanCancer Atlas)	TCGA-69-7765-01	Lung Adenocarcinoma	Q486*	OncoKB: Unknown, level NA;CIViC: NA;MyCancerGenome: not present;CancerHotspot: no;3DHotspot: no	MutationAssessor: NA;SIFT: NA;Polyphen-2: NA	Nonsense_Mutation	SNP	gain	1	.	.	.	7	55227989	55227989	C	T	7:g.55227989C>T	ENST00000275493.2:c.1456C>T	0.11		5	40		37	548	2020-12-28
Lung Adenocarcinoma (TCGA, PanCancer Atlas)	TCGA-97-8172-01	Lung Adenocarcinoma	G627*	OncoKB: Unknown, level NA;CIViC: NA;MyCancerGenome: not present;CancerHotspot: no;3DHotspot: no	MutationAssessor: NA;SIFT: NA;Polyphen-2: NA	Nonsense_Mutation	SNP	diploid		.	.	.	7	55233129	55233129	G	T	7:g.55233129G>T	ENST00000275493.2:c.1879G>T	0.09		4	39		52	247	15/28
Lung Squamous Cell Carcinoma (TCGA, PanCancer Atlas)	TCGA-46-3765-01	Lung Squamous Cell Carcinoma	G627*	OncoKB: Unknown, level NA;CIViC: NA;MyCancerGenome: not present;CancerHotspot: no;3DHotspot: no	MutationAssessor: NA;SIFT: NA;Polyphen-2: NA	Nonsense_Mutation	SNP	gain		.	.	.	7	55233129	55233129	G	T	7:g.55233129G>T	ENST00000275493.2:c.1879G>T	0.1		4	38		41	446	15/28
Pancreatic Adenocarcinoma (TCGA, PanCancer Atlas)	TCGA-IB-7651-01	Pancreatic Adenocarcinoma	R669*	OncoKB: Unknown, level NA;CIViC: NA;MyCancerGenome: not present;CancerHotspot: no;3DHotspot: no	MutationAssessor: NA;SIFT: NA;Polyphen-2: NA	Nonsense_Mutation	SNP	diploid	1	.	.	.	7	55240761	55240761	C	T	7:g.55240761C>T	ENST00000275493.2:c.2005C>T	0.17		76	378		91	14306	17/28	4.0024e-06		rs1231769201
Skin Cutaneous Melanoma (TCGA, PanCancer Atlas)	TCGA-D3-A8GI-06	Cutaneous Melanoma	Q581*	OncoKB: Unknown, level NA;CIViC: NA;MyCancerGenome: not present;CancerHotspot: no;3DHotspot: no	MutationAssessor: NA;SIFT: NA;Polyphen-2: NA	Nonsense_Mutation	SNP	shallowdel		.	.	.	7	55232991	55232991	C	T	7:g.55232991C>T	ENST00000275493.2:c.1741C>T	0.56		41	32		86	4282	15/28
Skin Cutaneous Melanoma (TCGA, PanCancer Atlas)	TCGA-EB-A4XL-01	Cutaneous Melanoma	Q982*	OncoKB: Unknown, level NA;CIViC: NA;MyCancerGenome: not present;CancerHotspot: no;3DHotspot: no	MutationAssessor: NA;SIFT: NA;Polyphen-2: NA	Nonsense_Mutation	SNP		1	.	.	.	7	55268104	55268104	C	T	7:g.55268104C>T	ENST00000275493.2:c.2944C>T	0.48		44	48		54	390	24/28
Skin Cutaneous Melanoma (TCGA, PanCancer Atlas)	TCGA-FW-A3R5-06	Cutaneous Melanoma	Q982*	OncoKB: Unknown, level NA;CIViC: NA;MyCancerGenome: not present;CancerHotspot: no;3DHotspot: no	MutationAssessor: NA;SIFT: NA;Polyphen-2: NA	Nonsense_Mutation	SNP	diploid	1	.	.	.	7	55268104	55268104	C	T	7:g.55268104C>T	ENST00000275493.2:c.2944C>T	0.25		19	58		104	15825	24/28
Skin Cutaneous Melanoma (TCGA, PanCancer Atlas)	TCGA-GN-A8LK-06	Cutaneous Melanoma	E1180*	OncoKB: Unknown, level NA;CIViC: NA;MyCancerGenome: not present;CancerHotspot: no;3DHotspot: no	MutationAssessor: NA;SIFT: NA;Polyphen-2: NA	Nonsense_Mutation	SNP	gain		.	.	.	7	55273215	55273215	G	T	7:g.55273215G>T	ENST00000275493.2:c.3538G>T	0.4		21	31		38	1665	28/28
Stomach Adenocarcinoma (TCGA, PanCancer Atlas)	TCGA-CG-5726-01	Intestinal Type Stomach Adenocarcinoma	R531*	OncoKB: Unknown, level NA;CIViC: NA;MyCancerGenome: not present;CancerHotspot: no;3DHotspot: no	MutationAssessor: NA;SIFT: NA;Polyphen-2: NA	Nonsense_Mutation	SNP	gain	1	.	.	.	7	55229284	55229284	C	T	7:g.55229284C>T	ENST00000275493.2:c.1591C>T	0.28		87	222		199	1201	13/28
Stomach Adenocarcinoma (TCGA, PanCancer Atlas)	TCGA-BR-8487-01	Stomach Adenocarcinoma	R1068*	OncoKB: Unknown, level NA;CIViC: NA;MyCancerGenome: not present;CancerHotspot: no;3DHotspot: no	MutationAssessor: NA;SIFT: NA;Polyphen-2: NA	Nonsense_Mutation	SNP	gain	1	.	.	.	7	55270249	55270249	C	T	7:g.55270249C>T	ENST00000275493.2:c.3202C>T	0.24		10	32		34	2683	27/28	4.00962e-06		rs749783044
Uterine Corpus Endometrial Carcinoma (TCGA, PanCancer Atlas)	TCGA-B5-A11E-01	Uterine Endometrioid Carcinoma	R531*	OncoKB: Unknown, level NA;CIViC: NA;MyCancerGenome: not present;CancerHotspot: no;3DHotspot: no	MutationAssessor: NA;SIFT: NA;Polyphen-2: NA	Nonsense_Mutation	SNP	diploid	1	.	.	.	7	55229284	55229284	C	T	7:g.55229284C>T	ENST00000275493.2:c.1591C>T	0.55		41	34		61	9039	13/28
Uterine Corpus Endometrial Carcinoma (TCGA, PanCancer Atlas)	TCGA-AX-A1CE-01	Uterine Endometrioid Carcinoma	R1068*	OncoKB: Unknown, level NA;CIViC: NA;MyCancerGenome: not present;CancerHotspot: no;3DHotspot: no	MutationAssessor: NA;SIFT: NA;Polyphen-2: NA	Nonsense_Mutation	SNP	diploid	1	.	.	.	7	55270249	55270249	C	T	7:g.55270249C>T	ENST00000275493.2:c.3202C>T	0.43		20	27		40	11440	27/28	4.00962e-06		rs749783044
Uterine Corpus Endometrial Carcinoma (TCGA, PanCancer Atlas)	TCGA-AP-A051-01	Uterine Endometrioid Carcinoma	Y827*	OncoKB: Unknown, level NA;CIViC: NA;MyCancerGenome: not present;CancerHotspot: no;3DHotspot: no	MutationAssessor: NA;SIFT: NA;Polyphen-2: NA	Nonsense_Mutation	SNP	diploid	1	.	.	.	7	55259423	55259423	C	A	7:g.55259423C>A	ENST00000275493.2:c.2481C>A	0.25		25	74		167	8312	21/28
Uterine Corpus Endometrial Carcinoma (TCGA, PanCancer Atlas)	TCGA-A5-A0G2-01	Uterine Serous Carcinoma/Uterine Papillary Serous Carcinoma	W880*	OncoKB: Unknown, level NA;CIViC: NA;MyCancerGenome: not present;CancerHotspot: no;3DHotspot: no	MutationAssessor: NA;SIFT: NA;Polyphen-2: NA	Nonsense_Mutation	SNP	diploid	1	.	.	.	7	55260473	55260473	G	A	7:g.55260473G>A	ENST00000275493.2:c.2640G>A	0.15		15	86		137	25712	22/28
Uterine Corpus Endometrial Carcinoma (TCGA, PanCancer Atlas)	TCGA-B5-A1MX-01	Uterine Endometrioid Carcinoma	G573*	OncoKB: Unknown, level NA;CIViC: NA;MyCancerGenome: not present;CancerHotspot: no;3DHotspot: no	MutationAssessor: NA;SIFT: NA;Polyphen-2: NA	Nonsense_Mutation	SNP	diploid	1	.	.	.	7	55231511	55231511	G	T	7:g.55231511G>T	ENST00000275493.2:c.1717G>T	0.55		6	5		16	5697	14/28
Uterine Corpus Endometrial Carcinoma (TCGA, PanCancer Atlas)	TCGA-BG-A0VZ-01	Uterine Endometrioid Carcinoma	R669*	OncoKB: Unknown, level NA;CIViC: NA;MyCancerGenome: not present;CancerHotspot: no;3DHotspot: no	MutationAssessor: NA;SIFT: NA;Polyphen-2: NA	Nonsense_Mutation	SNP	diploid	1	.	.	.	7	55240761	55240761	C	T	7:g.55240761C>T	ENST00000275493.2:c.2005C>T	0.09		4	42		26	332	17/28	4.0024e-06		rs1231769201
Uterine Corpus Endometrial Carcinoma (TCGA, PanCancer Atlas)	TCGA-A5-A0G2-01	Uterine Serous Carcinoma/Uterine Papillary Serous Carcinoma	C950*	OncoKB: Unknown, level NA;CIViC: NA;MyCancerGenome: not present;CancerHotspot: no;3DHotspot: no	MutationAssessor: NA;SIFT: NA;Polyphen-2: NA	Nonsense_Mutation	SNP	diploid		.	.	.	7	55268010	55268010	C	A	7:g.55268010C>A	ENST00000275493.2:c.2850C>A	0.15		60	336		442	25712	24/28
Uterine Corpus Endometrial Carcinoma (TCGA, PanCancer Atlas)	TCGA-B5-A3FA-01	Uterine Endometrioid Carcinoma	Y1016*	OncoKB: Unknown, level NA;CIViC: NA;MyCancerGenome: not present;CancerHotspot: no;3DHotspot: no	MutationAssessor: NA;SIFT: NA;Polyphen-2: NA	Nonsense_Mutation	SNP	diploid		.	.	.	7	55268982	55268982	C	A	7:g.55268982C>A	ENST00000275493.2:c.3048C>A	0.47		20	23		27	9652	25/28
Bladder Urothelial Carcinoma (TCGA, PanCancer Atlas)	TCGA-DK-A3IS-01	Bladder Urothelial Carcinoma	X901_splice	OncoKB: Unknown, level NA;CIViC: NA;MyCancerGenome: not present;CancerHotspot: no;3DHotspot: no	MutationAssessor: impact: , score: undefined;SIFT: NA;Polyphen-2: NA	Splice_Region	SNP	gain		.	.	.	7	55266407	55266407	C	G	7:g.55266407C>G	ENST00000275493.2:c.2702-3C>G	0.48		88	94		127	308		3.9764e-06		rs757467886
Bladder Urothelial Carcinoma (TCGA, PanCancer Atlas)	TCGA-DK-A3WW-01	Bladder Urothelial Carcinoma	X762_splice	OncoKB: Unknown, level NA;CIViC: NA;MyCancerGenome: not present;CancerHotspot: no;3DHotspot: no	MutationAssessor: impact: , score: undefined;SIFT: NA;Polyphen-2: NA	Splice_Region	SNP	diploid		.	.	.	7	55248978	55248978	C	A	7:g.55248978C>A	ENST00000275493.2:c.2284-8C>A	0.21		47	181		159	1083
Breast Invasive Carcinoma (TCGA, PanCancer Atlas)	TCGA-AO-A128-01	Breast Invasive Ductal Carcinoma	Y900=	OncoKB: Unknown, level NA;CIViC: NA;MyCancerGenome: not present;CancerHotspot: no;3DHotspot: no	MutationAssessor: NA;SIFT: NA;Polyphen-2: NA	Splice_Region	SNP	gain		.	.	.	7	55260533	55260533	C	T	7:g.55260533C>T	ENST00000275493.2:c.2700C>T	0.09		10	107		167	829	22/28	3.57933e-05		rs530256683
Colorectal Adenocarcinoma (TCGA, PanCancer Atlas)	TCGA-CK-5913-01	Colon Adenocarcinoma	C187=	OncoKB: Unknown, level NA;CIViC: NA;MyCancerGenome: not present;CancerHotspot: no;3DHotspot: no	MutationAssessor: impact: medium, score: 3.08;SIFT: NA;Polyphen-2: NA	Splice_Region	SNP	diploid		.	.	.	7	55218988	55218988	C	T	7:g.55218988C>T	ENST00000275493.2:c.561C>T	0.37		50	84		140	805	2020-05-28	3.97624e-06		rs776568205
Lung Adenocarcinoma (TCGA, PanCancer Atlas)	TCGA-50-5066-01	Lung Adenocarcinoma	L210=	OncoKB: Unknown, level NA;CIViC: NA;MyCancerGenome: not present;CancerHotspot: no;3DHotspot: no	MutationAssessor: NA;SIFT: NA;Polyphen-2: NA	Splice_Region	SNP	gain		.	.	.	7	55220240	55220240	G	T	7:g.55220240G>T	ENST00000275493.2:c.630G>T	0.1		30	279		302	264	2020-06-28
Lung Squamous Cell Carcinoma (TCGA, PanCancer Atlas)	TCGA-18-3417-01	Lung Squamous Cell Carcinoma	X297_splice	OncoKB: Unknown, level NA;CIViC: NA;MyCancerGenome: not present;CancerHotspot: no;3DHotspot: no	MutationAssessor: impact: , score: undefined;SIFT: NA;Polyphen-2: NA	Splice_Region	SNP	gain		.	.	.	7	55223520	55223520	C	T	7:g.55223520C>T	ENST00000275493.2:c.890-3C>T	0.53		73	66		122	255
Lung Squamous Cell Carcinoma (TCGA, PanCancer Atlas)	TCGA-33-4566-01	Lung Squamous Cell Carcinoma	X1039_splice	OncoKB: Unknown, level NA;CIViC: NA;MyCancerGenome: not present;CancerHotspot: no;3DHotspot: no	MutationAssessor: impact: , score: undefined;SIFT: NA;Polyphen-2: NA	Splice_Region	SNP	gain		.	.	.	7	55269425	55269425	C	T	7:g.55269425C>T	ENST00000275493.2:c.3115-3C>T	0.2		38	154		180	1197
Skin Cutaneous Melanoma (TCGA, PanCancer Atlas)	TCGA-EE-A3AD-06	Cutaneous Melanoma	R574=	OncoKB: Unknown, level NA;CIViC: NA;MyCancerGenome: not present;CancerHotspot: no;3DHotspot: no	MutationAssessor: NA;SIFT: NA;Polyphen-2: NA	Splice_Region	SNP	gain		.	.	.	7	55231516	55231516	G	A	7:g.55231516G>A	ENST00000275493.2:c.1722G>A	0.34		54	105		117	1610	14/28
Skin Cutaneous Melanoma (TCGA, PanCancer Atlas)	TCGA-D3-A51R-06	Cutaneous Melanoma	X1091_splice	OncoKB: Unknown, level NA;CIViC: NA;MyCancerGenome: not present;CancerHotspot: no;3DHotspot: no	MutationAssessor: impact: , score: undefined;SIFT: NA;Polyphen-2: NA	Splice_Region	SNP	gain		.	.	.	7	55270325	55270325	G	A	7:g.55270325G>A	ENST00000275493.2:c.3271+7G>A	0.48		10	11		20	592		4.22794e-06		rs1165853888
Skin Cutaneous Melanoma (TCGA, PanCancer Atlas)	TCGA-FR-A726-01	Cutaneous Melanoma	X640_splice	OncoKB: Unknown, level NA;CIViC: NA;MyCancerGenome: not present;CancerHotspot: no;3DHotspot: no	MutationAssessor: impact: , score: undefined;SIFT: NA;Polyphen-2: NA	Splice_Region	SNP			.	.	.	7	55240673	55240673	C	T	7:g.55240673C>T	ENST00000275493.2:c.1920-3C>T	0.42		57	80		116	5858				rs966644136
Skin Cutaneous Melanoma (TCGA, PanCancer Atlas)	TCGA-W3-AA1O-06	Cutaneous Melanoma	X640_splice	OncoKB: Unknown, level NA;CIViC: NA;MyCancerGenome: not present;CancerHotspot: no;3DHotspot: no	MutationAssessor: impact: , score: undefined;SIFT: NA;Polyphen-2: NA	Splice_Region	SNP	gain		.	.	.	7	55240673	55240673	C	T	7:g.55240673C>T	ENST00000275493.2:c.1920-3C>T	0.39		31	48		47	627				rs966644136
Uterine Corpus Endometrial Carcinoma (TCGA, PanCancer Atlas)	TCGA-EO-A3B0-01	Uterine Endometrioid Carcinoma	K209=	OncoKB: Unknown, level NA;CIViC: NA;MyCancerGenome: not present;CancerHotspot: no;3DHotspot: no	MutationAssessor: NA;SIFT: NA;Polyphen-2: NA	Splice_Region	SNP	diploid		.	.	.	7	55219054	55219054	A	G	7:g.55219054A>G	ENST00000275493.2:c.627A>G	0.14		5	30		54	10909	2020-05-28
Glioblastoma Multiforme (TCGA, PanCancer Atlas)	TCGA-12-0657-01	Glioblastoma Multiforme	X1038_splice	OncoKB: Unknown, level NA;CIViC: NA;MyCancerGenome: not present;CancerHotspot: no;3DHotspot: no	MutationAssessor: impact: , score: undefined;SIFT: NA;Polyphen-2: NA	Splice_Site	SNP	amp		.	.	.	7	55269049	55269049	G	A	7:g.55269049G>A	ENST00000275493.2:c.3114+1G>A	0.02	0.0016	71	3027	1	632	56
Lung Squamous Cell Carcinoma (TCGA, PanCancer Atlas)	TCGA-60-2698-01	Lung Squamous Cell Carcinoma	X210_splice	OncoKB: Unknown, level NA;CIViC: NA;MyCancerGenome: not present;CancerHotspot: no;3DHotspot: no	MutationAssessor: impact: , score: undefined;SIFT: NA;Polyphen-2: NA	Splice_Site	SNP	amp		.	.	.	7	55220237	55220237	A	G	7:g.55220237A>G	ENST00000275493.2:c.629-2A>G	0.04		63	1484		497	977
Sarcoma (TCGA, PanCancer Atlas)	TCGA-DX-AB32-01	Myxofibrosarcoma	X30_splice	OncoKB: Unknown, level NA;CIViC: NA;MyCancerGenome: not present;CancerHotspot: no;3DHotspot: no	MutationAssessor: NA;SIFT: NA;Polyphen-2: NA	Splice_Site	SNP	diploid		.	.	.	7	55087060	55087060	T	C	7:g.55087060T>C	ENST00000275493.2:c.88+2T>C	0.15		3	17		18	263
Sarcoma (TCGA, PanCancer Atlas)	TCGA-QQ-A8VF-01	Leiomyosarcoma	D984Mfs*18	OncoKB: Unknown, level NA;CIViC: NA;MyCancerGenome: not present;CancerHotspot: no;3DHotspot: no	MutationAssessor: NA;SIFT: NA;Polyphen-2: NA	Splice_Site	DEL	gain		.	.	.	7	55268880	55268880	G	-	7:g.55268880del	ENST00000275493.2:c.2950del	0.33		38	77		37	747

## Sheet: EGFR-fusions only
Study	Sample ID	Cancer Type	Protein Change	Copy #	# Mut in Sample	Class
Glioblastoma Multiforme (TCGA, PanCancer Atlas)	TCGA-02-2485-01	Glioblastoma Multiforme	EGFR-SEPT14	amp	55	2
Glioblastoma Multiforme (TCGA, PanCancer Atlas)	TCGA-06-A6S1-01	Glioblastoma Multiforme	EGFR-SEPT14	gain	45	2
Glioblastoma Multiforme (TCGA, PanCancer Atlas)	TCGA-14-1825-01	Glioblastoma Multiforme	EGFR-SEPT14	gain	46	2
Glioblastoma Multiforme (TCGA, PanCancer Atlas)	TCGA-27-1837-01	Glioblastoma Multiforme	EGFR-SEPT14	amp	35	2
Glioblastoma Multiforme (TCGA, PanCancer Atlas)	TCGA-28-1747-01	Glioblastoma Multiforme	EGFR-SEPT14	amp	43	2
Glioblastoma Multiforme (TCGA, PanCancer Atlas)	TCGA-28-2513-01	Glioblastoma Multiforme	EGFR-SEPT14	amp	77	2
Glioblastoma Multiforme (TCGA, PanCancer Atlas)	TCGA-32-5222-01	Glioblastoma Multiforme	EGFR-SEPT14	amp	62	2
Glioblastoma Multiforme (TCGA, PanCancer Atlas)	TCGA-06-0211-01	Glioblastoma Multiforme	EGFR-SEPT14	amp	55	2
Glioblastoma Multiforme (TCGA, PanCancer Atlas)	TCGA-06-0750-01	Glioblastoma Multiforme	EGFR-SEPT14	amp	33	2
Head and Neck Squamous Cell Carcinoma (TCGA, PanCancer Atlas)	TCGA-CR-7368-01	Head and Neck Squamous Cell Carcinoma	EGFR-SEPT14	diploid	190	2
Brain Lower Grade Glioma (TCGA, PanCancer Atlas)	TCGA-DU-5852-01	Oligoastrocytoma	EGFR-SEPT14	amp	65	2
Brain Lower Grade Glioma (TCGA, PanCancer Atlas)	TCGA-DU-6406-01	Oligoastrocytoma	EGFR-SEPT14	amp	5	2
Brain Lower Grade Glioma (TCGA, PanCancer Atlas)	TCGA-DU-6407-01	Oligodendroglioma	EGFR-SEPT14	gain	21	2
Bladder Urothelial Carcinoma (TCGA, PanCancer Atlas)	TCGA-FD-A3B7-01	Bladder Urothelial Carcinoma	EGFR-GYG1	amp	66	2	?
Bladder Urothelial Carcinoma (TCGA, PanCancer Atlas)	TCGA-GC-A6I3-01	Bladder Urothelial Carcinoma	EGFR-GRB10	amp	205	4
Bladder Urothelial Carcinoma (TCGA, PanCancer Atlas)	TCGA-GU-A766-01	Bladder Urothelial Carcinoma	RHBDD2-EGFR	gain	168	1
Glioblastoma Multiforme (TCGA, PanCancer Atlas)	TCGA-19-A60I-01	Glioblastoma Multiforme	EGFR-TEAD3	amp	28	2
Glioblastoma Multiforme (TCGA, PanCancer Atlas)	TCGA-32-5222-01	Glioblastoma Multiforme	EGFR-SEPT14P24	amp	62	2
Glioblastoma Multiforme (TCGA, PanCancer Atlas)	TCGA-06-2565-01	Glioblastoma Multiforme	SEC61G-EGFR	amp	44	1
Glioblastoma Multiforme (TCGA, PanCancer Atlas)	TCGA-06-0211-01	Glioblastoma Multiforme	SEC61G-EGFR	amp	55	1
Head and Neck Squamous Cell Carcinoma (TCGA, PanCancer Atlas)	TCGA-BA-6872-01	Head and Neck Squamous Cell Carcinoma	EGFR-DYM	amp	159	2
Head and Neck Squamous Cell Carcinoma (TCGA, PanCancer Atlas)	TCGA-CV-6941-01	Head and Neck Squamous Cell Carcinoma	EGFR-ACADM	amp	147	2
Brain Lower Grade Glioma (TCGA, PanCancer Atlas)	TCGA-E1-A7YJ-01	Astrocytoma	EGFR-C7orf72	amp	33	2
Brain Lower Grade Glioma (TCGA, PanCancer Atlas)	TCGA-S9-A6WM-01	Astrocytoma	EGFR-VSTM2A	amp	56	2
Liver Hepatocellular Carcinoma (TCGA, PanCancer Atlas)	TCGA-2Y-A9H0-01	Hepatocellular Carcinoma	EGFR-LYST	gain	73	2
Lung Squamous Cell Carcinoma (TCGA, PanCancer Atlas)	TCGA-O2-A52N-01	Lung Squamous Cell Carcinoma	EGFR-CHODL	amp	451	2
Lung Squamous Cell Carcinoma (TCGA, PanCancer Atlas)	TCGA-70-6723-01	Lung Squamous Cell Carcinoma	TCEA1-EGFR	amp	105	1
Stomach Adenocarcinoma (TCGA, PanCancer Atlas)	TCGA-BR-6706-01	Stomach Adenocarcinoma	EGFR-INSL4	amp	190	2
Stomach Adenocarcinoma (TCGA, PanCancer Atlas)	TCGA-BR-6706-01	Stomach Adenocarcinoma	EGFR-RCL1	amp	190	2
Stomach Adenocarcinoma (TCGA, PanCancer Atlas)	TCGA-RD-A8N1-01	Diffuse Type Stomach Adenocarcinoma	RAC1P2-EGFR	gain	99	1
	Fusion Partners	Count
	EGFR-SEPT14	13
	SEC61G-EGFR	2
	EGFR-GYG1	1
	EGFR-GRB10	1
	RHBDD2-EGFR	1
	EGFR-TEAD3	1
	EGFR-SEPT14P24	1
	EGFR-DYM	1
	EGFR-ACADM	1
	EGFR-C7orf72	1
	EGFR-VSTM2A	1
	EGFR-LYST	1
	EGFR-CHODL	1
	TCEA1-EGFR	1
	EGFR-INSL4	1
	EGFR-RCL1	1
	RAC1P2-EGFR	1
	sample ID	EGFR Mutations
	TCGA-02-2485-01	A289D
	TCGA-06-A6S1-01	R222C, V774M
	TCGA-14-1825-01	none
	TCGA-27-1837-01	none
	TCGA-28-1747-01	G598V, H304Y, R108G
	TCGA-28-2513-01	none
	TCGA-32-5222-01	none
	TCGA-06-0211-01	T263P
	TCGA-06-0750-01	A289D, A289T, P596R
	TCGA-19-A60I-01	none
	TCGA-06-2565-01	R108K, S654C
TCGA PAN CANCER
Cancer Type Detailed	Alteration Frequency	Alteration Type	Count
Glioblastoma Multiforme	1.85811	fusion
Oligoastrocytoma	1.53846	fusion
Diffuse Type Stomach Adenocarcinoma	1.38889	fusion
Astrocytoma	1.03093	fusion
Bladder Urothelial Carcinoma	0.729927	fusion
Stomach Adenocarcinoma	0.606061	fusion
Head and Neck Squamous Cell Carcinoma	0.573614	fusion
Oligodendroglioma	0.529101	fusion
Lung Squamous Cell Carcinoma	0.410678	fusion
Hepatocellular Carcinoma	0.271003	fusion
MSK IMPACT
Cancer Type Detailed	Alteration Frequency	Alteration Type
Glioblastoma Multiforme	23.7762	fusion
Anaplastic Oligoastrocytoma	6.25	fusion
Anaplastic Astrocytoma	5.81395	fusion
Uterine Carcinosarcoma/Uterine Malignant Mixed Mullerian Tumor	2.63158	fusion
Breast Invasive Carcinoma, NOS	2.5	fusion
Cutaneous Squamous Cell Carcinoma	1.81818	fusion
Cancer of Unknown Primary	0.684932	fusion
Lung Squamous Cell Carcinoma	0.588235	fusion
Lung Adenocarcinoma	0.442152	fusion
Prostate Adenocarcinoma	0.143266	fusion
Colon Adenocarcinoma	0.138122	fusion
AACR Genie
Cancer Type Detailed	Alteration Frequency	Alteration Type	count	out of
Glioblastoma Multiforme	15.3939	fusion	1650	1650
Glioblastoma	8.29576	fusion	92	1109
Perihilar Cholangiocarcinoma	5.26316	fusion
Esophageal Poorly Differentiated Carcinoma	4.54545	fusion
High-Grade Glioma, NOS	4.45545	fusion
Gliosarcoma	4.41176	fusion
Osteoblastic Osteosarcoma	3.57143	fusion
Acinar Cell Carcinoma of the Pancreas	3.50877	fusion
Malignant Peripheral Nerve Sheath Tumor	3.15789	fusion
Poorly Differentiated Carcinoma of the Stomach	3.09278	fusion
Anaplastic Astrocytoma	2.80172	fusion
Malignant Phyllodes Tumor of the Breast	2.77778	fusion
Intestinal Type Stomach Adenocarcinoma	2.5	fusion
Combined Small Cell Lung Carcinoma	2.38095	fusion
Signet Ring Cell Carcinoma of the Stomach	2.22222	fusion
Anaplastic Oligoastrocytoma	2.08333	fusion
Lung Neuroendocrine Tumor	1.96078	fusion
Astrocytoma	1.94175	fusion
Anorectal Mucosal Melanoma	1.88679	fusion
Lung Adenosquamous Carcinoma	1.88679	fusion
Anaplastic Ependymoma	1.5873	fusion
Myxofibrosarcoma	1.51515	fusion
Ependymoma	1.31579	fusion
Glioma, NOS	1.16279	fusion
Diffuse Astrocytoma	1.08696	fusion
Lung Adenocarcinoma	1.0278	fusion
Angiosarcoma	0.813008	fusion
Non-Small Cell Lung Cancer	0.803674	fusion
Poorly Differentiated Non-Small Cell Lung Cancer	0.754717	fusion
Small Cell Lung Cancer	0.59761	fusion
Large Cell Neuroendocrine Carcinoma	0.546448	fusion
Esophagogastric Adenocarcinoma	0.543478	fusion
Adenocarcinoma, NOS	0.527009	fusion
Squamous Cell Carcinoma, NOS	0.497512	fusion
Gallbladder Cancer	0.483092	fusion
Cutaneous Squamous Cell Carcinoma	0.446429	fusion
Osteosarcoma	0.4329	fusion
Dedifferentiated Liposarcoma	0.414938	fusion
Melanoma of Unknown Primary	0.4	fusion
Esophageal Adenocarcinoma	0.362319	fusion
Invasive Breast Carcinoma	0.342231	fusion
Mucinous Adenocarcinoma of the Colon and Rectum	0.341297	fusion
Lung Squamous Cell Carcinoma	0.303951	fusion
Uterine Carcinosarcoma/Uterine Malignant Mixed Mullerian Tumor	0.298507	fusion
Sarcoma, NOS	0.271739	fusion
Adenocarcinoma of the Gastroesophageal Junction	0.26455	fusion
Mixed Cancer Types	0.246609	fusion
Breast Invasive Carcinoma, NOS	0.242718	fusion
Colon Adenocarcinoma	0.18622	fusion
Intrahepatic Cholangiocarcinoma	0.180505	fusion
Breast Mixed Ductal and Lobular Carcinoma	0.176367	fusion
Stomach Adenocarcinoma	0.15361	fusion
Melanoma	0.144092	fusion
Cancer of Unknown Primary	0.132626	fusion
Breast Invasive Ductal Carcinoma	0.130787	fusion
Colorectal Adenocarcinoma	0.0946074	fusion
Prostate Adenocarcinoma	0.088054	fusion
Cutaneous Melanoma	0.0680272	fusion
Pancreatic Adenocarcinoma	0.0672269	fusion
High-Grade Serous Ovarian Cancer	0.0513875	fusion
Simple Cancer Types AACR
Cancer Type	Alteration Frequency	Alteration Type
Glioma	7.17094	fusion
Nerve Sheath Tumor	1.44231	fusion
Breast Sarcoma	1.20482	fusion
Non-Small Cell Lung Cancer	0.913179	fusion
Small Cell Lung Cancer	0.735294	fusion
Esophagogastric Cancer	0.551833	fusion
CNS Cancer	0.344828	fusion
Bone Cancer	0.278164	fusion
Mixed Cancer Types	0.249377	fusion
Cancer of Unknown Primary	0.216216	fusion
Hepatobiliary Cancer	0.159067	fusion
Melanoma	0.157109	fusion
Skin Cancer, Non-Melanoma	0.149031	fusion
Soft Tissue Sarcoma	0.145349	fusion
Breast Cancer	0.145324	fusion
Colorectal Cancer	0.138696	fusion
Pancreatic Cancer	0.111545	fusion
Prostate Cancer	0.0862317	fusion
Endometrial Cancer	0.0340948	fusion
Ovarian Cancer	0.0279799	fusion
MSK
Cancer Type	Alteration Frequency	Alteration Type
Glioma	13.3816	fusion
Skin Cancer, Non-Melanoma	0.675676	fusion
Cancer of Unknown Primary	0.537634	fusion
Endometrial Cancer	0.458716	fusion
Non-Small Cell Lung Cancer	0.419664	fusion
Prostate Cancer	0.13947	fusion
Colorectal Cancer	0.0993049	fusion
Breast Cancer	0.0755287	fusion
TCGA
Cancer Type	Alteration Frequency	Alteration Type
Glioblastoma	1.85811	fusion	combined for bar graph
Diffuse Glioma	0.974659	fusion	2.82
Bladder Urothelial Carcinoma	0.729927	fusion
Head and Neck Squamous Cell Carcinoma	0.573614	fusion
Esophagogastric Adenocarcinoma	0.389105	fusion
Hepatocellular Carcinoma	0.271003	fusion	in hepatobiliary cancer
Non-Small Cell Lung Cancer	0.189934	fusion

## Sheet: EGFR coalterations
Gene	MutSig(Q-value)	# Mut	#	Profiled Samples	Freq	Is Cancer Gene (source: OncoKB)				Gene	Frequency
TP53		14	12	27	0.444	Yes				TP53	0.444
EGFR		16	9	27	0.333	Yes				EGFR	0.333
TTN		14	7	27	0.259	No				TTN	0.259
MUC16		7	7	27	0.259	No				MUC16	0.259
DNAH5		5	5	27	0.185	No				DNAH5	0.185
ACACA		4	4	27	0.148	No				ACACA	0.148
DMD		4	4	27	0.148	No				DMD	0.148
PTEN		4	4	27	0.148	Yes				PTEN	0.148
ZNF804A		4	4	27	0.148	No				ZNF804A	0.148
XIRP2		4	4	27	0.148	No				XIRP2	0.148
CACNA1S		3	3	27	0.111	No				CACNA1S	0.111
FBN2		3	3	27	0.111	No				FBN2	0.111
IGHG2		3	3	27	0.111	No				IGHG2	0.111
MAP1A		3	3	27	0.111	No				MAP1A	0.111
KMT2A		3	3	27	0.111	Yes				KMT2A	0.111
NGF		3	3	27	0.111	No				NGF	0.111
DDR2		3	3	27	0.111	Yes				DDR2	0.111
NUMA1		3	3	27	0.111	Yes				NUMA1	0.111
PIK3CA		3	3	27	0.111	Yes				PIK3CA	0.111
PTPN13		3	3	27	0.111	Yes				PTPN13	0.111
RP1		3	3	27	0.111	No				RP1	0.111
RYR1		3	3	27	0.111	No				RYR1	0.111
TLR4		3	3	27	0.111	No				TLR4	0.111
CCDC144A		3	3	27	0.111	No				CCDC144A	0.111
PTPRT		3	3	27	0.111	Yes				PTPRT	0.111
PCLO		3	3	27	0.111	Yes				PCLO	0.111
TRHDE		5	3	27	0.111	No				TRHDE	0.111
PREX1		3	3	27	0.111	No				PREX1	0.111
ZFHX4		5	3	27	0.111	No				ZFHX4	0.111
HMCN1		3	3	27	0.111	No				HMCN1	0.111
ZNF347		3	3	27	0.111	No				ZNF347	0.111
MROH2B		3	3	27	0.111	No				MROH2B	0.111
CD163L1		3	3	27	0.111	No				CD163L1	0.111
OR4N4		3	3	27	0.111	No				OR4N4	0.111
CCDC39		4	3	27	0.111	No				CCDC39	0.111
FLG2		3	3	27	0.111	No				FLG2	0.111
ANK3		2	2	27	0.074	No				ANK3	0.074
AOX1		2	2	27	0.074	No				AOX1	0.074
ATRX		2	2	27	0.074	Yes				ATRX	0.074
BMP1		2	2	27	0.074	No				BMP1	0.074
BTK		2	2	27	0.074	Yes				BTK	0.074
CD14		2	2	27	0.074	No				CD14	0.074
CDH6		2	2	27	0.074	No				CDH6	0.074
CDH8		2	2	27	0.074	No				CDH8	0.074
CDKN2A		2	2	27	0.074	Yes				CDKN2A	0.074
CNTN1		2	2	27	0.074	No				CNTN1	0.074
COL1A2		2	2	27	0.074	No				COL1A2	0.074
COL5A1		2	2	27	0.074	No				COL5A1	0.074
CYP4A11		2	2	27	0.074	No				CYP4A11	0.074
DNAH9		2	2	27	0.074	No				DNAH9	0.074
DYNC1I1		2	2	27	0.074	No				DYNC1I1	0.074
DSG2		2	2	27	0.074	No				DSG2	0.074
DSP		3	2	27	0.074	No				DSP	0.074
ENPEP		2	2	27	0.074	No				ENPEP	0.074
EPHB2		2	2	27	0.074	No				EPHB2	0.074
FAP		2	2	27	0.074	No				FAP	0.074
FSHR		3	2	27	0.074	No				FSHR	0.074
FYN		2	2	27	0.074	Yes				FYN	0.074
GABRG3		2	2	27	0.074	No				GABRG3	0.074
GNAZ		2	2	27	0.074	No				GNAZ	0.074
GPR6		2	2	27	0.074	No				GPR6	0.074
NCKAP1L		2	2	27	0.074	No				NCKAP1L	0.074
IL2RB		2	2	27	0.074	No				IL2RB	0.074
IL5RA		2	2	27	0.074	No				IL5RA	0.074
ITGB4		2	2	27	0.074	No				ITGB4	0.074
KRT82		2	2	27	0.074	No				KRT82	0.074
LEPR		2	2	27	0.074	No				LEPR	0.074
LRP2		2	2	27	0.074	No				LRP2	0.074
MN1		3	2	27	0.074	Yes				MN1	0.074
MYCN		2	2	27	0.074	Yes				MYCN	0.074
MYF5		2	2	27	0.074	No				MYF5	0.074
MYH2		2	2	27	0.074	No				MYH2	0.074
MYH3		2	2	27	0.074	No				MYH3	0.074
MYH8		2	2	27	0.074	No				MYH8	0.074
NEFM		2	2	27	0.074	No				NEFM	0.074
PAX6		2	2	27	0.074	No				PAX6	0.074
PCSK1		2	2	27	0.074	No				PCSK1	0.074
PEG3		3	2	27	0.074	No				PEG3	0.074
PIK3R1		2	2	27	0.074	Yes				PIK3R1	0.074
PLCL1		2	2	27	0.074	No				PLCL1	0.074
PLOD2		2	2	27	0.074	No				PLOD2	0.074
PRKCQ		2	2	27	0.074	No				PRKCQ	0.074
RELN		2	2	27	0.074	Yes				RELN	0.074
PTPRH		2	2	27	0.074	No				PTPRH	0.074
PTPRM		2	2	27	0.074	No				PTPRM	0.074
RB1		2	2	27	0.074	Yes				RB1	0.074
RBP3		2	2	27	0.074	No				RBP3	0.074
REV3L		2	2	27	0.074	No				REV3L	0.074
BRD2		2	2	27	0.074	No				BRD2	0.074
CLIP1		2	2	27	0.074	Yes				CLIP1	0.074
RYR2		2	2	27	0.074	No				RYR2	0.074
SI		2	2	27	0.074	No				SI	0.074
SLC1A6		2	2	27	0.074	No				SLC1A6	0.074
SLC6A3		2	2	27	0.074	No				SLC6A3	0.074
SLIT3		2	2	27	0.074	No				SLIT3	0.074
SPTA1		2	2	27	0.074	No				SPTA1	0.074
SREBF1		2	2	27	0.074	No				SREBF1	0.074
TRPC5		2	2	27	0.074	No				TRPC5	0.074
TTC3		2	2	27	0.074	No				TTC3	0.074
KDM6A		2	2	27	0.074	Yes				KDM6A	0.074
ZAP70		2	2	27	0.074	No				ZAP70	0.074
KMT2D		2	2	27	0.074	Yes				KMT2D	0.074
USP9X		2	2	27	0.074	No				USP9X	0.074
CADPS		2	2	27	0.074	No				CADPS	0.074
OASL		2	2	27	0.074	No				OASL	0.074
URI1		2	2	27	0.074	No				URI1	0.074
MYOM1		2	2	27	0.074	No				MYOM1	0.074
ADAM7		2	2	27	0.074	No				ADAM7	0.074
FPGT		2	2	27	0.074	No				FPGT	0.074
REPS2		2	2	27	0.074	No				REPS2	0.074
LRRFIP2		2	2	27	0.074	No				LRRFIP2	0.074
NOLC1		2	2	27	0.074	No				NOLC1	0.074
DLG5		2	2	27	0.074	No				DLG5	0.074
RNF14		2	2	27	0.074	No				RNF14	0.074
NCOR1		2	2	27	0.074	Yes				NCOR1	0.074
GCC2		2	2	27	0.074	No				GCC2	0.074
KDM4A		2	2	27	0.074	No				KDM4A	0.074
PCDHGA8		2	2	27	0.074	No				PCDHGA8	0.074
CKAP5		2	2	27	0.074	No				CKAP5	0.074
MAML1		2	2	27	0.074	No				MAML1	0.074
SPEG		2	2	27	0.074	No				SPEG	0.074
ABCA9		2	2	27	0.074	No				ABCA9	0.074
SEMA3C		2	2	27	0.074	No				SEMA3C	0.074
HEXIM1		2	2	27	0.074	No				HEXIM1	0.074
YME1L1		2	2	27	0.074	No				YME1L1	0.074
ADAM29		2	2	27	0.074	No				ADAM29	0.074
ADAMTS13		2	2	27	0.074	No				ADAMTS13	0.074
ADAMTS5		2	2	27	0.074	No				ADAMTS5	0.074
PLA2R1		2	2	27	0.074	No				PLA2R1	0.074
RAB3GAP1		2	2	27	0.074	No				RAB3GAP1	0.074
MYO16		2	2	27	0.074	No				MYO16	0.074
ZNF292		3	2	27	0.074	No				ZNF292	0.074
SYNE2		2	2	27	0.074	No				SYNE2	0.074
SEL1L3		2	2	27	0.074	No				SEL1L3	0.074
KIAA0556		2	2	27	0.074	No				KIAA0556	0.074
ADGRL2		2	2	27	0.074	No				ADGRL2	0.074
UBR2		2	2	27	0.074	No				UBR2	0.074
SYNE1		2	2	27	0.074	No				SYNE1	0.074
ABCA6		2	2	27	0.074	No				ABCA6	0.074
RIMBP2		2	2	27	0.074	No				RIMBP2	0.074
FLRT2		2	2	27	0.074	No				FLRT2	0.074
PRPF6		2	2	27	0.074	No				PRPF6	0.074
ZNF521		2	2	27	0.074	Yes				ZNF521	0.074
CNTNAP2		2	2	27	0.074	No				CNTNAP2	0.074
EDRF1		2	2	27	0.074	No				EDRF1	0.074
ABCA12		2	2	27	0.074	No				ABCA12	0.074
IFT172		2	2	27	0.074	No				IFT172	0.074
ELP4		2	2	27	0.074	No				ELP4	0.074
OR7E24		2	2	27	0.074	No				OR7E24	0.074
CYTH4		2	2	27	0.074	No				CYTH4	0.074
INTU		2	2	27	0.074	No				INTU	0.074
PCDH17		2	2	27	0.074	No				PCDH17	0.074
PCDH11X		2	2	27	0.074	No				PCDH11X	0.074
IGLV3-12		2	2	27	0.074	No				IGLV3-12	0.074
PACSIN1		2	2	27	0.074	No				PACSIN1	0.074
TRAPPC12		2	2	27	0.074	No				TRAPPC12	0.074
MYO15A		3	2	27	0.074	No				MYO15A	0.074
RAB6B		2	2	27	0.074	No				RAB6B	0.074
LRP1B		2	2	27	0.074	Yes				LRP1B	0.074
UGT1A8		2	2	27	0.074	No				UGT1A8	0.074
DPP8		2	2	27	0.074	No				DPP8	0.074
PLPPR1		2	2	27	0.074	No				PLPPR1	0.074
MKS1		2	2	27	0.074	No				MKS1	0.074
FAM120C		2	2	27	0.074	No				FAM120C	0.074
ACSM5		2	2	27	0.074	No				ACSM5	0.074
MRM3		2	2	27	0.074	No				MRM3	0.074
MTMR8		2	2	27	0.074	No				MTMR8	0.074
CHD7		2	2	27	0.074	No				CHD7	0.074
SLF2		2	2	27	0.074	No				SLF2	0.074
PCDHGB2		2	2	27	0.074	No				PCDHGB2	0.074
PCDHGA11		2	2	27	0.074	No				PCDHGA11	0.074
PCDHAC2		2	2	27	0.074	No				PCDHAC2	0.074
PCDHAC1		2	2	27	0.074	No				PCDHAC1	0.074
PCDHA10		2	2	27	0.074	No				PCDHA10	0.074
DNAH7		2	2	27	0.074	No				DNAH7	0.074
YLPM1		2	2	27	0.074	No				YLPM1	0.074
PAK5		3	2	27	0.074	Yes				PAK5	0.074
ZNFX1		2	2	27	0.074	No				ZNFX1	0.074
CEMIP		2	2	27	0.074	No				CEMIP	0.074
MTUS1		2	2	27	0.074	No				MTUS1	0.074
PCDH19		2	2	27	0.074	No				PCDH19	0.074
SEMA6A		2	2	27	0.074	No				SEMA6A	0.074
UNC79		2	2	27	0.074	No				UNC79	0.074
USP28		2	2	27	0.074	No				USP28	0.074
RNF213		3	2	27	0.074	Yes				RNF213	0.074
ZDBF2		2	2	27	0.074	No				ZDBF2	0.074
INIP		2	2	27	0.074	No				INIP	0.074
SCAF1		2	2	27	0.074	No				SCAF1	0.074
ALX4		2	2	27	0.074	No				ALX4	0.074
CDH23		2	2	27	0.074	No				CDH23	0.074
ADGRL4		2	2	27	0.074	No				ADGRL4	0.074
XYLT2		2	2	27	0.074	No				XYLT2	0.074
NBEAL1		2	2	27	0.074	No				NBEAL1	0.074
PCDH15		2	2	27	0.074	No				PCDH15	0.074
ZBBX		2	2	27	0.074	No				ZBBX	0.074
THSD4		2	2	27	0.074	No				THSD4	0.074
PREX2		2	2	27	0.074	Yes				PREX2	0.074
THSD7B		2	2	27	0.074	No				THSD7B	0.074
PCDH11Y		2	2	27	0.074	No				PCDH11Y	0.074
SYT16		2	2	27	0.074	No				SYT16	0.074
ADGRV1		2	2	27	0.074	No				ADGRV1	0.074
DOT1L		2	2	27	0.074	Yes				DOT1L	0.074
FBN3		2	2	27	0.074	No				FBN3	0.074
COL25A1		2	2	27	0.074	No				COL25A1	0.074
PLEKHA8		2	2	27	0.074	No				PLEKHA8	0.074
ZNF341		2	2	27	0.074	No				ZNF341	0.074
MASTL		2	2	27	0.074	No				MASTL	0.074
TGIF2LX		2	2	27	0.074	No				TGIF2LX	0.074
CDHR1		2	2	27	0.074	No				CDHR1	0.074
MYOCD		2	2	27	0.074	No				MYOCD	0.074
LRRC4B		2	2	27	0.074	No				LRRC4B	0.074
AHNAK2		4	2	27	0.074	No				AHNAK2	0.074
CSMD3		3	2	27	0.074	No				CSMD3	0.074
OSBPL6		2	2	27	0.074	No				OSBPL6	0.074
FCRL3		2	2	27	0.074	No				FCRL3	0.074
PNLIPRP3		3	2	27	0.074	No				PNLIPRP3	0.074
FAT3		2	2	27	0.074	No				FAT3	0.074
LRRK2		2	2	27	0.074	Yes				LRRK2	0.074
NLRP13		3	2	27	0.074	No				NLRP13	0.074
OR14C36		2	2	27	0.074	No				OR14C36	0.074
ZNF831		2	2	27	0.074	No				ZNF831	0.074
UGT3A1		2	2	27	0.074	No				UGT3A1	0.074
TAF1L		2	2	27	0.074	No				TAF1L	0.074
OR13C8		2	2	27	0.074	No				OR13C8	0.074
NLRP4		2	2	27	0.074	No				NLRP4	0.074
ZNF98		2	2	27	0.074	No				ZNF98	0.074
RC3H1		2	2	27	0.074	No				RC3H1	0.074
RUNDC3B		2	2	27	0.074	No				RUNDC3B	0.074
ABCA13		2	2	27	0.074	No				ABCA13	0.074
IQUB		2	2	27	0.074	No				IQUB	0.074
SYNE3		2	2	27	0.074	No				SYNE3	0.074
LGI4		2	2	27	0.074	No				LGI4	0.074
DCLK2		2	2	27	0.074	No				DCLK2	0.074
RBM46		2	2	27	0.074	No				RBM46	0.074
ADAMTS15		2	2	27	0.074	No				ADAMTS15	0.074
ADAMTS16		2	2	27	0.074	No				ADAMTS16	0.074
DNAH10		2	2	27	0.074	No				DNAH10	0.074
CMYA5		2	2	27	0.074	No				CMYA5	0.074
SLC44A5		2	2	27	0.074	No				SLC44A5	0.074
OR5D14		2	2	27	0.074	No				OR5D14	0.074
NALCN		2	2	27	0.074	No				NALCN	0.074
OR8D1		2	2	27	0.074	No				OR8D1	0.074
CFAP47		2	2	27	0.074	No				CFAP47	0.074
PPM1J		2	2	27	0.074	No				PPM1J	0.074
NLRP9		2	2	27	0.074	No				NLRP9	0.074
OR2T3		2	2	27	0.074	No				OR2T3	0.074
SLC26A5		2	2	27	0.074	No				SLC26A5	0.074
ZNF808		3	2	27	0.074	No				ZNF808	0.074
HRNR		2	2	27	0.074	No				HRNR	0.074
SPATA31D1		2	2	27	0.074	No				SPATA31D1	0.074
AJM1		2	2	27	0.074	No				AJM1	0.074
OR56A3		2	2	27	0.074	No				OR56A3	0.074
OR8H2		2	2	27	0.074	No				OR8H2	0.074
OR2AK2		2	2	27	0.074	No				OR2AK2	0.074
IQSEC3		3	2	27	0.074	No				IQSEC3	0.074
OR9K2		2	2	27	0.074	No				OR9K2	0.074
LRRC18		2	2	27	0.074	No				LRRC18	0.074
MUC5B		2	2	27	0.074	No				MUC5B	0.074
ZNF814		2	2	27	0.074	No				ZNF814	0.074
AARS		1	1	27	0.037	No				AARS	0.037
ABCB7		1	1	27	0.037	No				ABCB7	0.037
ACADVL		1	1	27	0.037	No				ACADVL	0.037
ACR		1	1	27	0.037	No				ACR	0.037
ACTB		1	1	27	0.037	Yes				ACTB	0.037
ACVR2A		1	1	27	0.037	Yes				ACVR2A	0.037
PLIN2		1	1	27	0.037	No				PLIN2	0.037
ADH7		1	1	27	0.037	No				ADH7	0.037
PARP4		1	1	27	0.037	No				PARP4	0.037
JAG1		1	1	27	0.037	No				JAG1	0.037
ALAS2		1	1	27	0.037	No				ALAS2	0.037
ALB		1	1	27	0.037	Yes				ALB	0.037
ALK		1	1	27	0.037	Yes				ALK	0.037
ALOX12		1	1	27	0.037	No				ALOX12	0.037
ALPL		1	1	27	0.037	No				ALPL	0.037
ALPG		1	1	27	0.037	No				ALPG	0.037
AMBN		1	1	27	0.037	No				AMBN	0.037
ANK1		1	1	27	0.037	No				ANK1	0.037
ANK2		1	1	27	0.037	No				ANK2	0.037
ANXA3		1	1	27	0.037	No				ANXA3	0.037
APBB1		1	1	27	0.037	No				APBB1	0.037
APC		1	1	27	0.037	Yes				APC	0.037
APLP1		1	1	27	0.037	No				APLP1	0.037
APOB		1	1	27	0.037	No				APOB	0.037
TRIM23		1	1	27	0.037	No				TRIM23	0.037
ARF5		1	1	27	0.037	No				ARF5	0.037
ARHGAP4		1	1	27	0.037	No				ARHGAP4	0.037
ARHGAP5		1	1	27	0.037	No				ARHGAP5	0.037
ARHGDIA		1	1	27	0.037	No				ARHGDIA	0.037
ASGR1		1	1	27	0.037	No				ASGR1	0.037
ASTN1		1	1	27	0.037	No				ASTN1	0.037
ZFHX3		1	1	27	0.037	Yes				ZFHX3	0.037
ATF4		1	1	27	0.037	No				ATF4	0.037
ATP1A3		1	1	27	0.037	No				ATP1A3	0.037
ATP2A1		1	1	27	0.037	No				ATP2A1	0.037
ATP2B1		1	1	27	0.037	No				ATP2B1	0.037
ATP6V1B1		1	1	27	0.037	No				ATP6V1B1	0.037
ATP6V0A1		1	1	27	0.037	No				ATP6V0A1	0.037
ATR		1	1	27	0.037	Yes				ATR	0.037
ADGRB3		1	1	27	0.037	No				ADGRB3	0.037
BBS1		1	1	27	0.037	No				BBS1	0.037
BLK		1	1	27	0.037	No				BLK	0.037
BNC1		1	1	27	0.037	No				BNC1	0.037
BMPR1A		1	1	27	0.037	Yes				BMPR1A	0.037
BMPR1B		1	1	27	0.037	No				BMPR1B	0.037
BMPR2		1	1	27	0.037	No				BMPR2	0.037
DST		1	1	27	0.037	No				DST	0.037
BPGM		1	1	27	0.037	No				BPGM	0.037
BRCA1		1	1	27	0.037	Yes				BRCA1	0.037
BUB1		1	1	27	0.037	No				BUB1	0.037
SERPING1		1	1	27	0.037	No				SERPING1	0.037
C4BPA		1	1	27	0.037	No				C4BPA	0.037
CACNA1C		2	1	27	0.037	No				CACNA1C	0.037
CACNA1D		1	1	27	0.037	Yes				CACNA1D	0.037
CACNA1E		1	1	27	0.037	No				CACNA1E	0.037
CACNA1F		1	1	27	0.037	No				CACNA1F	0.037
CAD		1	1	27	0.037	Yes				CAD	0.037
CALR		1	1	27	0.037	Yes				CALR	0.037
CANX		1	1	27	0.037	No				CANX	0.037
CARS		1	1	27	0.037	Yes				CARS	0.037
CASQ1		1	1	27	0.037	No				CASQ1	0.037
CBLB		1	1	27	0.037	Yes				CBLB	0.037
CBLN1		1	1	27	0.037	No				CBLN1	0.037
CCNG1		1	1	27	0.037	No				CCNG1	0.037
CD1A		1	1	27	0.037	No				CD1A	0.037
MS4A1		1	1	27	0.037	No				MS4A1	0.037
CD22		1	1	27	0.037	Yes				CD22	0.037
CD80		1	1	27	0.037	No				CD80	0.037
TNFRSF8		1	1	27	0.037	No				TNFRSF8	0.037
SIGLEC6		1	1	27	0.037	No				SIGLEC6	0.037
CD37		1	1	27	0.037	No				CD37	0.037
CD72		1	1	27	0.037	No				CD72	0.037
CDK11B		1	1	27	0.037	No				CDK11B	0.037
LRBA		1	1	27	0.037	No				LRBA	0.037
CDH1		1	1	27	0.037	Yes				CDH1	0.037
CDH10		1	1	27	0.037	No				CDH10	0.037
CDH11		1	1	27	0.037	Yes				CDH11	0.037
CDH13		1	1	27	0.037	No				CDH13	0.037
CDH17		1	1	27	0.037	No				CDH17	0.037
CDH18		2	1	27	0.037	No				CDH18	0.037
CDKN1A		1	1	27	0.037	Yes				CDKN1A	0.037
CENPC		1	1	27	0.037	No				CENPC	0.037
CENPF		1	1	27	0.037	No				CENPF	0.037
CEACAM3		1	1	27	0.037	No				CEACAM3	0.037
RCBTB2		1	1	27	0.037	No				RCBTB2	0.037
RCC1		1	1	27	0.037	No				RCC1	0.037
CHD1		1	1	27	0.037	No				CHD1	0.037
CHD2		1	1	27	0.037	Yes				CHD2	0.037
CHML		1	1	27	0.037	No				CHML	0.037
CHRM2		1	1	27	0.037	No				CHRM2	0.037
CKB		1	1	27	0.037	No				CKB	0.037
CKS2		1	1	27	0.037	No				CKS2	0.037
CLCA1		1	1	27	0.037	No				CLCA1	0.037
CLCN1		1	1	27	0.037	No				CLCN1	0.037
CLCNKB		1	1	27	0.037	No				CLCNKB	0.037
CCR6		1	1	27	0.037	No				CCR6	0.037
CMKLR1		1	1	27	0.037	No				CMKLR1	0.037
LTB4R		1	1	27	0.037	No				LTB4R	0.037
ABCC2		1	1	27	0.037	No				ABCC2	0.037
CNGA4		1	1	27	0.037	No				CNGA4	0.037
CNR1		1	1	27	0.037	No				CNR1	0.037
COL4A4		1	1	27	0.037	No				COL4A4	0.037
COL4A6		1	1	27	0.037	No				COL4A6	0.037
COL6A2		1	1	27	0.037	No				COL6A2	0.037
COL11A1		1	1	27	0.037	No				COL11A1	0.037
COL16A1		1	1	27	0.037	No				COL16A1	0.037
COL17A1		1	1	27	0.037	No				COL17A1	0.037
COL19A1		1	1	27	0.037	No				COL19A1	0.037
KLF6		1	1	27	0.037	Yes				KLF6	0.037
CPA1		1	1	27	0.037	No				CPA1	0.037
CPN1		1	1	27	0.037	No				CPN1	0.037
CR1		1	1	27	0.037	No				CR1	0.037
ATF6B		1	1	27	0.037	No				ATF6B	0.037
CRHR2		1	1	27	0.037	No				CRHR2	0.037
CSN3		1	1	27	0.037	No				CSN3	0.037
CSNK1A1		1	1	27	0.037	No				CSNK1A1	0.037
CSNK1G3		1	1	27	0.037	No				CSNK1G3	0.037
CYP2C8		1	1	27	0.037	No				CYP2C8	0.037
CYP11B2		1	1	27	0.037	No				CYP11B2	0.037
CYP27B1		1	1	27	0.037	No				CYP27B1	0.037
DGKG		1	1	27	0.037	No				DGKG	0.037
DAO		1	1	27	0.037	No				DAO	0.037
BRINP1		1	1	27	0.037	No				BRINP1	0.037
DCC		1	1	27	0.037	No				DCC	0.037
DCN		1	1	27	0.037	No				DCN	0.037
DDB1		1	1	27	0.037	No				DDB1	0.037
DDX6		1	1	27	0.037	Yes				DDX6	0.037
DES		1	1	27	0.037	No				DES	0.037
DIAPH2		1	1	27	0.037	No				DIAPH2	0.037
DLG1		1	1	27	0.037	No				DLG1	0.037
DNA2		1	1	27	0.037	No				DNA2	0.037
DNM2		1	1	27	0.037	Yes				DNM2	0.037
DOCK2		1	1	27	0.037	No				DOCK2	0.037
DPEP1		1	1	27	0.037	No				DPEP1	0.037
DPT		1	1	27	0.037	No				DPT	0.037
DRP2		1	1	27	0.037	No				DRP2	0.037
DSC3		1	1	27	0.037	No				DSC3	0.037
DVL3		1	1	27	0.037	No				DVL3	0.037
ECHS1		1	1	27	0.037	No				ECHS1	0.037
EEF1G		1	1	27	0.037	No				EEF1G	0.037
EEF2		1	1	27	0.037	No				EEF2	0.037
MEGF9		1	1	27	0.037	No				MEGF9	0.037
EGR4		1	1	27	0.037	No				EGR4	0.037
EPHA2		1	1	27	0.037	No				EPHA2	0.037
EIF4A1		1	1	27	0.037	No				EIF4A1	0.037
ELAVL1		1	1	27	0.037	No				ELAVL1	0.037
EPRS		1	1	27	0.037	No				EPRS	0.037
ERBB2		2	1	27	0.037	Yes				ERBB2	0.037
ERBB3		1	1	27	0.037	Yes				ERBB3	0.037
ERBB4		1	1	27	0.037	Yes				ERBB4	0.037
ERV3-1		1	1	27	0.037	No				ERV3-1	0.037
ETV5		1	1	27	0.037	Yes				ETV5	0.037
EVC		1	1	27	0.037	No				EVC	0.037
MECOM		1	1	27	0.037	Yes				MECOM	0.037
F5		1	1	27	0.037	No				F5	0.037
F8		1	1	27	0.037	No				F8	0.037
FANCA		1	1	27	0.037	Yes				FANCA	0.037
FANCC		1	1	27	0.037	Yes				FANCC	0.037
BPTF		1	1	27	0.037	No				BPTF	0.037
FAT1		2	1	27	0.037	Yes				FAT1	0.037
FAT2		1	1	27	0.037	No				FAT2	0.037
FBN1		1	1	27	0.037	No				FBN1	0.037
FCER2		1	1	27	0.037	No				FCER2	0.037
FCGRT		1	1	27	0.037	No				FCGRT	0.037
FDPS		1	1	27	0.037	No				FDPS	0.037
FGFR3		1	1	27	0.037	Yes				FGFR3	0.037
GPC5		1	1	27	0.037	No				GPC5	0.037
FKBP5		1	1	27	0.037	No				FKBP5	0.037
FOXE1		1	1	27	0.037	No				FOXE1	0.037
FLG		1	1	27	0.037	No				FLG	0.037
FLNC		1	1	27	0.037	No				FLNC	0.037
AFF2		1	1	27	0.037	No				AFF2	0.037
FN1		1	1	27	0.037	No				FN1	0.037
FOSL2		1	1	27	0.037	No				FOSL2	0.037
ADAM2		1	1	27	0.037	No				ADAM2	0.037
G6PD		1	1	27	0.037	No				G6PD	0.037
GABPA		1	1	27	0.037	No				GABPA	0.037
GABRA1		1	1	27	0.037	No				GABRA1	0.037
GABRA3		1	1	27	0.037	No				GABRA3	0.037
GABRA5		1	1	27	0.037	No				GABRA5	0.037
GABRB1		1	1	27	0.037	No				GABRB1	0.037
GABRB3		1	1	27	0.037	No				GABRB3	0.037
GABRR1		1	1	27	0.037	No				GABRR1	0.037
NIPSNAP2		1	1	27	0.037	No				NIPSNAP2	0.037
GCG		1	1	27	0.037	No				GCG	0.037
GGT1		1	1	27	0.037	No				GGT1	0.037
GGT5		1	1	27	0.037	No				GGT5	0.037
GH2		1	1	27	0.037	No				GH2	0.037
GHR		1	1	27	0.037	No				GHR	0.037
GJB5		1	1	27	0.037	No				GJB5	0.037
GLG1		1	1	27	0.037	No				GLG1	0.037
GNAT2		1	1	27	0.037	No				GNAT2	0.037
GOLGA4		1	1	27	0.037	No				GOLGA4	0.037
GP1BA		1	1	27	0.037	No				GP1BA	0.037
UTS2R		1	1	27	0.037	No				UTS2R	0.037
GPR15		1	1	27	0.037	No				GPR15	0.037
GPR17		1	1	27	0.037	No				GPR17	0.037
LPAR4		1	1	27	0.037	No				LPAR4	0.037
GPX5		1	1	27	0.037	No				GPX5	0.037
GRIA1		1	1	27	0.037	No				GRIA1	0.037
GRIA2		1	1	27	0.037	No				GRIA2	0.037
GRIA3		1	1	27	0.037	No				GRIA3	0.037
GRID1		1	1	27	0.037	No				GRID1	0.037
GRIK2		1	1	27	0.037	No				GRIK2	0.037
GRIN2B		1	1	27	0.037	No				GRIN2B	0.037
GRM1		1	1	27	0.037	No				GRM1	0.037
GRM6		1	1	27	0.037	No				GRM6	0.037
GSTA1		1	1	27	0.037	No				GSTA1	0.037
GSTM5		1	1	27	0.037	No				GSTM5	0.037
GTF2F1		1	1	27	0.037	No				GTF2F1	0.037
GTF2H2		1	1	27	0.037	No				GTF2H2	0.037
GTF2I		1	1	27	0.037	Yes				GTF2I	0.037
GUCY1A1		1	1	27	0.037	No				GUCY1A1	0.037
GUCY2C		1	1	27	0.037	No				GUCY2C	0.037
HIST1H1C		1	1	27	0.037	Yes				HIST1H1C	0.037
HADH		1	1	27	0.037	No				HADH	0.037
HAS3		2	1	27	0.037	No				HAS3	0.037
HBB		1	1	27	0.037	No				HBB	0.037
HELLS		1	1	27	0.037	No				HELLS	0.037
HFE		1	1	27	0.037	No				HFE	0.037
HGFAC		1	1	27	0.037	No				HGFAC	0.037
HLA-DOB		1	1	27	0.037	No				HLA-DOB	0.037
HLF		1	1	27	0.037	Yes				HLF	0.037
HMGCS1		2	1	27	0.037	No				HMGCS1	0.037
NR4A1		1	1	27	0.037	No				NR4A1	0.037
HNMT		1	1	27	0.037	No				HNMT	0.037
HNRNPH2		1	1	27	0.037	No				HNRNPH2	0.037
HOXA13		1	1	27	0.037	Yes				HOXA13	0.037
HOXB9		1	1	27	0.037	No				HOXB9	0.037
HOXC13		1	1	27	0.037	Yes				HOXC13	0.037
HPGD		1	1	27	0.037	No				HPGD	0.037
HPS1		1	1	27	0.037	No				HPS1	0.037
HRH1		1	1	27	0.037	No				HRH1	0.037
HRG		1	1	27	0.037	No				HRG	0.037
PRMT1		1	1	27	0.037	No				PRMT1	0.037
HSD17B1		1	1	27	0.037	No				HSD17B1	0.037
HSPA4		1	1	27	0.037	No				HSPA4	0.037
HSPA6		1	1	27	0.037	No				HSPA6	0.037
HTR3A		1	1	27	0.037	No				HTR3A	0.037
HTR5A		1	1	27	0.037	No				HTR5A	0.037
HTR6		1	1	27	0.037	No				HTR6	0.037
IDH1		1	1	27	0.037	Yes				IDH1	0.037
CFI		1	1	27	0.037	No				CFI	0.037
IFNA8		1	1	27	0.037	No				IFNA8	0.037
IGF2R		1	1	27	0.037	No				IGF2R	0.037
IGFBP1		1	1	27	0.037	No				IGFBP1	0.037
IGSF1		1	1	27	0.037	No				IGSF1	0.037
IL2RG		1	1	27	0.037	No				IL2RG	0.037
IL6R		1	1	27	0.037	No				IL6R	0.037
IL12B		1	1	27	0.037	No				IL12B	0.037
IL12RB2		1	1	27	0.037	No				IL12RB2	0.037
IMPG1		1	1	27	0.037	No				IMPG1	0.037
ITGA2		1	1	27	0.037	No				ITGA2	0.037
ITGAD		1	1	27	0.037	No				ITGAD	0.037
ITGAM		1	1	27	0.037	No				ITGAM	0.037
ITGB1		1	1	27	0.037	No				ITGB1	0.037
STT3A		1	1	27	0.037	No				STT3A	0.037
JAK1		1	1	27	0.037	Yes				JAK1	0.037
JAK3		1	1	27	0.037	Yes				JAK3	0.037
JUP		1	1	27	0.037	No				JUP	0.037
CD82		1	1	27	0.037	No				CD82	0.037
KCNA5		1	1	27	0.037	No				KCNA5	0.037
KCNA10		1	1	27	0.037	No				KCNA10	0.037
KCNH1		1	1	27	0.037	No				KCNH1	0.037
KCNN2		1	1	27	0.037	No				KCNN2	0.037
KCNQ2		1	1	27	0.037	No				KCNQ2	0.037
KCNS3		1	1	27	0.037	No				KCNS3	0.037
KIF5C		1	1	27	0.037	No				KIF5C	0.037
KIR2DL1		1	1	27	0.037	No				KIR2DL1	0.037
KIR2DL3		1	1	27	0.037	No				KIR2DL3	0.037
KLK1		1	1	27	0.037	No				KLK1	0.037
KIFC1		1	1	27	0.037	No				KIFC1	0.037
KPNA1		1	1	27	0.037	No				KPNA1	0.037
KRT8		1	1	27	0.037	No				KRT8	0.037
KRT14		1	1	27	0.037	No				KRT14	0.037
KRT15		1	1	27	0.037	No				KRT15	0.037
KRT17		1	1	27	0.037	No				KRT17	0.037
KRT31		1	1	27	0.037	No				KRT31	0.037
KRT34		1	1	27	0.037	No				KRT34	0.037
KRT84		1	1	27	0.037	No				KRT84	0.037
KRT86		1	1	27	0.037	No				KRT86	0.037
AFF3		1	1	27	0.037	Yes				AFF3	0.037
LAMA2		1	1	27	0.037	No				LAMA2	0.037
LAMA3		1	1	27	0.037	No				LAMA3	0.037
LAMA4		1	1	27	0.037	No				LAMA4	0.037
LBP		1	1	27	0.037	No				LBP	0.037
LCN2		1	1	27	0.037	No				LCN2	0.037
LIFR		1	1	27	0.037	Yes				LIFR	0.037
LIPA		1	1	27	0.037	No				LIPA	0.037
LMAN1		1	1	27	0.037	No				LMAN1	0.037
LRP4		1	1	27	0.037	No				LRP4	0.037
LTBP1		1	1	27	0.037	No				LTBP1	0.037
LTK		1	1	27	0.037	Yes				LTK	0.037
CAPRIN1		1	1	27	0.037	No				CAPRIN1	0.037
SMAD2		1	1	27	0.037	Yes				SMAD2	0.037
SMAD4		1	1	27	0.037	Yes				SMAD4	0.037
MAG		1	1	27	0.037	No				MAG	0.037
MAGEA6		1	1	27	0.037	No				MAGEA6	0.037
MAGEA10		1	1	27	0.037	No				MAGEA10	0.037
MAGEB1		1	1	27	0.037	No				MAGEB1	0.037
MAGEB2		1	1	27	0.037	No				MAGEB2	0.037
MAGEB4		1	1	27	0.037	No				MAGEB4	0.037
MAOB		1	1	27	0.037	No				MAOB	0.037
MAPT		1	1	27	0.037	No				MAPT	0.037
MAX		1	1	27	0.037	Yes				MAX	0.037
MC4R		1	1	27	0.037	No				MC4R	0.037
MC5R		1	1	27	0.037	No				MC5R	0.037
MCM4		1	1	27	0.037	No				MCM4	0.037
MCM6		1	1	27	0.037	No				MCM6	0.037
MEIS1		1	1	27	0.037	No				MEIS1	0.037
MEIS2		1	1	27	0.037	No				MEIS2	0.037
MAP3K5		1	1	27	0.037	No				MAP3K5	0.037
MEP1B		1	1	27	0.037	No				MEP1B	0.037
MGAT1		1	1	27	0.037	No				MGAT1	0.037
MGAT5		1	1	27	0.037	No				MGAT5	0.037
MIPEP		1	1	27	0.037	No				MIPEP	0.037
MKI67		1	1	27	0.037	Yes				MKI67	0.037
MLH1		1	1	27	0.037	Yes				MLH1	0.037
MMP3		1	1	27	0.037	No				MMP3	0.037
MMP16		1	1	27	0.037	No				MMP16	0.037
MMP17		1	1	27	0.037	No				MMP17	0.037
MMP19		1	1	27	0.037	No				MMP19	0.037
MPP1		1	1	27	0.037	No				MPP1	0.037
MSH4		1	1	27	0.037	No				MSH4	0.037
MSN		1	1	27	0.037	Yes				MSN	0.037
MTF1		1	1	27	0.037	No				MTF1	0.037
NUDT1		1	1	27	0.037	No				NUDT1	0.037
MTIF2		1	1	27	0.037	No				MTIF2	0.037
MTR		1	1	27	0.037	No				MTR	0.037
MUC2		1	1	27	0.037	No				MUC2	0.037
MUC5AC		1	1	27	0.037	No				MUC5AC	0.037
MUSK		1	1	27	0.037	No				MUSK	0.037
MX2		1	1	27	0.037	No				MX2	0.037
MYBPC1		1	1	27	0.037	No				MYBPC1	0.037
MYH1		1	1	27	0.037	No				MYH1	0.037
MYH7		1	1	27	0.037	No				MYH7	0.037
MYO5A		1	1	27	0.037	Yes				MYO5A	0.037
MYO7A		1	1	27	0.037	No				MYO7A	0.037
MYT1		1	1	27	0.037	No				MYT1	0.037
NAP1L3		1	1	27	0.037	No				NAP1L3	0.037
NELL2		1	1	27	0.037	No				NELL2	0.037
NF1		1	1	27	0.037	Yes				NF1	0.037
NFATC2		1	1	27	0.037	Yes				NFATC2	0.037
NFYC		1	1	27	0.037	No				NFYC	0.037
NID1		1	1	27	0.037	No				NID1	0.037
NKTR		1	1	27	0.037	No				NKTR	0.037
NMT1		1	1	27	0.037	No				NMT1	0.037
NOP2		1	1	27	0.037	No				NOP2	0.037
NOS2		1	1	27	0.037	No				NOS2	0.037
NPHS1		1	1	27	0.037	No				NPHS1	0.037
NPR3		1	1	27	0.037	No				NPR3	0.037
NPTX2		1	1	27	0.037	No				NPTX2	0.037
SLC11A2		1	1	27	0.037	No				SLC11A2	0.037
NRAP		1	1	27	0.037	No				NRAP	0.037
NRDC		1	1	27	0.037	No				NRDC	0.037
NUP88		1	1	27	0.037	No				NUP88	0.037
OCA2		1	1	27	0.037	No				OCA2	0.037
OPRD1		1	1	27	0.037	No				OPRD1	0.037
OPRK1		1	1	27	0.037	No				OPRK1	0.037
OPRM1		1	1	27	0.037	No				OPRM1	0.037
OSBP		1	1	27	0.037	No				OSBP	0.037
OTC		1	1	27	0.037	No				OTC	0.037
OXCT1		1	1	27	0.037	No				OXCT1	0.037
FURIN		1	1	27	0.037	Yes				FURIN	0.037
PCSK6		1	1	27	0.037	No				PCSK6	0.037
SERPINB2		1	1	27	0.037	No				SERPINB2	0.037
PAM		1	1	27	0.037	No				PAM	0.037
PAPPA		1	1	27	0.037	No				PAPPA	0.037
PCDH7		1	1	27	0.037	No				PCDH7	0.037
PCNT		1	1	27	0.037	No				PCNT	0.037
PCSK5		1	1	27	0.037	No				PCSK5	0.037
PCYT1A		1	1	27	0.037	No				PCYT1A	0.037
PDE1C		1	1	27	0.037	No				PDE1C	0.037
PDE2A		1	1	27	0.037	No				PDE2A	0.037
PDE4B		1	1	27	0.037	No				PDE4B	0.037
PDGFRL		1	1	27	0.037	No				PDGFRL	0.037
PDK1		1	1	27	0.037	Yes				PDK1	0.037
PEX14		1	1	27	0.037	No				PEX14	0.037
CFP		1	1	27	0.037	No				CFP	0.037
SERPINB8		1	1	27	0.037	No				SERPINB8	0.037
SERPINB9		1	1	27	0.037	No				SERPINB9	0.037
SERPINI1		1	1	27	0.037	No				SERPINI1	0.037
PIGF		1	1	27	0.037	No				PIGF	0.037
PIK3C3		1	1	27	0.037	Yes				PIK3C3	0.037
PIK3R2		1	1	27	0.037	Yes				PIK3R2	0.037
PI4KB		1	1	27	0.037	No				PI4KB	0.037
PIN4		1	1	27	0.037	No				PIN4	0.037
PKD2		1	1	27	0.037	No				PKD2	0.037
PLA2G4A		1	1	27	0.037	No				PLA2G4A	0.037
PLCG1		1	1	27	0.037	Yes				PLCG1	0.037
PLCG2		1	1	27	0.037	Yes				PLCG2	0.037
PLEC		1	1	27	0.037	No				PLEC	0.037
PMS2		1	1	27	0.037	Yes				PMS2	0.037
POLA1		1	1	27	0.037	No				POLA1	0.037
POLD1		1	1	27	0.037	Yes				POLD1	0.037
POLE		2	1	27	0.037	Yes				POLE	0.037
POLR2G		1	1	27	0.037	No				POLR2G	0.037
PPID		1	1	27	0.037	No				PPID	0.037
PPP1R3A		1	1	27	0.037	No				PPP1R3A	0.037
PPP4C		1	1	27	0.037	No				PPP4C	0.037
PRCC		1	1	27	0.037	Yes				PRCC	0.037
PRKCG		1	1	27	0.037	No				PRKCG	0.037
MAPK8		1	1	27	0.037	No				MAPK8	0.037
MAPK10		1	1	27	0.037	No				MAPK10	0.037
MAP2K7		1	1	27	0.037	No				MAP2K7	0.037
EIF2AK2		1	1	27	0.037	No				EIF2AK2	0.037
PROX1		1	1	27	0.037	No				PROX1	0.037
PRPS2		1	1	27	0.037	No				PRPS2	0.037
PRSS1		1	1	27	0.037	Yes				PRSS1	0.037
PSMB2		1	1	27	0.037	No				PSMB2	0.037
PSMD1		1	1	27	0.037	No				PSMD1	0.037
PTGDR		1	1	27	0.037	No				PTGDR	0.037
PTGS1		1	1	27	0.037	No				PTGS1	0.037
PTPN14		1	1	27	0.037	No				PTPN14	0.037
PTPRB		1	1	27	0.037	Yes				PTPRB	0.037
PTPRC		1	1	27	0.037	Yes				PTPRC	0.037
PTPRJ		1	1	27	0.037	No				PTPRJ	0.037
PTPRR		1	1	27	0.037	No				PTPRR	0.037
PURA		1	1	27	0.037	No				PURA	0.037
RGL2		1	1	27	0.037	No				RGL2	0.037
RABGGTB		1	1	27	0.037	No				RABGGTB	0.037
RAD51B		1	1	27	0.037	Yes				RAD51B	0.037
RAG1		1	1	27	0.037	No				RAG1	0.037
RASGRF2		1	1	27	0.037	No				RASGRF2	0.037
RBL1		1	1	27	0.037	No				RBL1	0.037
REG1A		1	1	27	0.037	No				REG1A	0.037
REG1B		1	1	27	0.037	No				REG1B	0.037
REST		1	1	27	0.037	Yes				REST	0.037
RET		1	1	27	0.037	Yes				RET	0.037
RFC4		2	1	27	0.037	No				RFC4	0.037
RFC5		2	1	27	0.037	No				RFC5	0.037
RFPL1		1	1	27	0.037	No				RFPL1	0.037
RGS1		1	1	27	0.037	No				RGS1	0.037
GRK1		1	1	27	0.037	No				GRK1	0.037
ROBO1		1	1	27	0.037	Yes				ROBO1	0.037
ROCK1		1	1	27	0.037	No				ROCK1	0.037
RPL5		1	1	27	0.037	Yes				RPL5	0.037
RPL6		1	1	27	0.037	No				RPL6	0.037
RPL22		1	1	27	0.037	Yes				RPL22	0.037
RPS6KA1		1	1	27	0.037	No				RPS6KA1	0.037
RPS20		1	1	27	0.037	No				RPS20	0.037
RRM2		1	1	27	0.037	No				RRM2	0.037
RYR3		1	1	27	0.037	No				RYR3	0.037
SAT1		1	1	27	0.037	No				SAT1	0.037
SATB1		1	1	27	0.037	No				SATB1	0.037
SERPINB4		1	1	27	0.037	Yes				SERPINB4	0.037
SCN1A		1	1	27	0.037	No				SCN1A	0.037
SCN3A		1	1	27	0.037	No				SCN3A	0.037
SCN5A		1	1	27	0.037	No				SCN5A	0.037
SCN8A		1	1	27	0.037	No				SCN8A	0.037
SCNN1B		1	1	27	0.037	No				SCNN1B	0.037
SFPQ		1	1	27	0.037	Yes				SFPQ	0.037
SFRP2		1	1	27	0.037	Yes				SFRP2	0.037
ITSN1		1	1	27	0.037	No				ITSN1	0.037
PMEL		1	1	27	0.037	No				PMEL	0.037
SLC1A7		1	1	27	0.037	No				SLC1A7	0.037
SLC4A1		1	1	27	0.037	No				SLC4A1	0.037
SLC5A2		1	1	27	0.037	No				SLC5A2	0.037
SLC6A1		1	1	27	0.037	No				SLC6A1	0.037
SLC6A7		1	1	27	0.037	No				SLC6A7	0.037
SLC34A1		1	1	27	0.037	No				SLC34A1	0.037
SLC18A2		1	1	27	0.037	No				SLC18A2	0.037
SLC20A1		1	1	27	0.037	No				SLC20A1	0.037
SMARCA2		1	1	27	0.037	Yes				SMARCA2	0.037
SMS		1	1	27	0.037	No				SMS	0.037
SNRPD3		1	1	27	0.037	No				SNRPD3	0.037
SOAT1		1	1	27	0.037	No				SOAT1	0.037
SON		1	1	27	0.037	No				SON	0.037
SPRR1A		1	1	27	0.037	No				SPRR1A	0.037
SPTAN1		1	1	27	0.037	No				SPTAN1	0.037
SRPRA		1	1	27	0.037	No				SRPRA	0.037
SSTR4		1	1	27	0.037	No				SSTR4	0.037
SS18		1	1	27	0.037	Yes				SS18	0.037
ST13		1	1	27	0.037	No				ST13	0.037
ST14		1	1	27	0.037	No				ST14	0.037
STAT6		1	1	27	0.037	Yes				STAT6	0.037
STC1		1	1	27	0.037	No				STC1	0.037
CDKL5		1	1	27	0.037	No				CDKL5	0.037
SULT1A2		1	1	27	0.037	No				SULT1A2	0.037
STRN		1	1	27	0.037	Yes				STRN	0.037
SUPT6H		1	1	27	0.037	No				SUPT6H	0.037
ABCC8		1	1	27	0.037	No				ABCC8	0.037
MED22		1	1	27	0.037	No				MED22	0.037
SVIL		1	1	27	0.037	No				SVIL	0.037
SYCP1		1	1	27	0.037	No				SYCP1	0.037
TACR3		1	1	27	0.037	No				TACR3	0.037
TAF1		1	1	27	0.037	Yes				TAF1	0.037
TAF2		1	1	27	0.037	No				TAF2	0.037
TAF9		2	1	27	0.037	No				TAF9	0.037
TAPBP		1	1	27	0.037	No				TAPBP	0.037
CNTN2		1	1	27	0.037	No				CNTN2	0.037
TBX3		1	1	27	0.037	Yes				TBX3	0.037
TCF3		1	1	27	0.037	Yes				TCF3	0.037
TCOF1		1	1	27	0.037	No				TCOF1	0.037
TRGV5		1	1	27	0.037	No				TRGV5	0.037
TDO2		1	1	27	0.037	No				TDO2	0.037
TEAD1		1	1	27	0.037	No				TEAD1	0.037
NR2F1		1	1	27	0.037	No				NR2F1	0.037
TG		1	1	27	0.037	No				TG	0.037
TGFBI		1	1	27	0.037	No				TGFBI	0.037
TGM1		1	1	27	0.037	No				TGM1	0.037
TCHH		1	1	27	0.037	No				TCHH	0.037
KLF10		1	1	27	0.037	No				KLF10	0.037
TIAM1		1	1	27	0.037	No				TIAM1	0.037
TIMP3		1	1	27	0.037	No				TIMP3	0.037
TLE4		1	1	27	0.037	Yes				TLE4	0.037
TSPAN7		1	1	27	0.037	No				TSPAN7	0.037
TNR		1	1	27	0.037	No				TNR	0.037
TNXB		1	1	27	0.037	No				TNXB	0.037
TPD52L2		1	1	27	0.037	No				TPD52L2	0.037
TPI1		1	1	27	0.037	No				TPI1	0.037
TPR		1	1	27	0.037	Yes				TPR	0.037
CCT3		1	1	27	0.037	No				CCT3	0.037
TRPM2		1	1	27	0.037	No				TRPM2	0.037
TRPS1		1	1	27	0.037	No				TRPS1	0.037
TSC1		1	1	27	0.037	Yes				TSC1	0.037
TSHR		2	1	27	0.037	Yes				TSHR	0.037
PHLDA2		1	1	27	0.037	No				PHLDA2	0.037
TSTA3		1	1	27	0.037	No				TSTA3	0.037
TTK		1	1	27	0.037	No				TTK	0.037
TULP1		1	1	27	0.037	No				TULP1	0.037
TYRO3		1	1	27	0.037	Yes				TYRO3	0.037
TYRP1		1	1	27	0.037	No				TYRP1	0.037
UBA52		1	1	27	0.037	No				UBA52	0.037
UBC		1	1	27	0.037	No				UBC	0.037
UBA7		1	1	27	0.037	No				UBA7	0.037
UBE3A		1	1	27	0.037	No				UBE3A	0.037
COL14A1		1	1	27	0.037	No				COL14A1	0.037
USP4		1	1	27	0.037	No				USP4	0.037
UROS		1	1	27	0.037	No				UROS	0.037
USH2A		1	1	27	0.037	No				USH2A	0.037
UTRN		2	1	27	0.037	No				UTRN	0.037
UVRAG		1	1	27	0.037	No				UVRAG	0.037
CLIP2		1	1	27	0.037	No				CLIP2	0.037
WNT3		1	1	27	0.037	No				WNT3	0.037
WNT5A		1	1	27	0.037	No				WNT5A	0.037
WNT2B		1	1	27	0.037	No				WNT2B	0.037
ZSCAN20		1	1	27	0.037	No				ZSCAN20	0.037
ZNF33A		1	1	27	0.037	No				ZNF33A	0.037
ZNF43		1	1	27	0.037	No				ZNF43	0.037
ZNF75D		1	1	27	0.037	No				ZNF75D	0.037
ZNF221		1	1	27	0.037	No				ZNF221	0.037
MKRN3		1	1	27	0.037	No				MKRN3	0.037
VEZF1		1	1	27	0.037	No				VEZF1	0.037
RNF112		1	1	27	0.037	No				RNF112	0.037
PXDN		1	1	27	0.037	No				PXDN	0.037
TUBA1A		1	1	27	0.037	No				TUBA1A	0.037
PAX8		1	1	27	0.037	Yes				PAX8	0.037
IL1R2		1	1	27	0.037	No				IL1R2	0.037
SCG2		1	1	27	0.037	No				SCG2	0.037
USP7		1	1	27	0.037	No				USP7	0.037
PRRC2A		1	1	27	0.037	No				PRRC2A	0.037
ST7		1	1	27	0.037	No				ST7	0.037
ARHGEF5		1	1	27	0.037	No				ARHGEF5	0.037
KAT6A		1	1	27	0.037	Yes				KAT6A	0.037
NUP214		1	1	27	0.037	Yes				NUP214	0.037
CUBN		1	1	27	0.037	No				CUBN	0.037
AAAS		1	1	27	0.037	No				AAAS	0.037
ST8SIA2		1	1	27	0.037	No				ST8SIA2	0.037
SLC7A5		1	1	27	0.037	No				SLC7A5	0.037
SLC14A2		1	1	27	0.037	No				SLC14A2	0.037
GDF5		1	1	27	0.037	No				GDF5	0.037
NCOA3		1	1	27	0.037	Yes				NCOA3	0.037
ARID1A		1	1	27	0.037	Yes				ARID1A	0.037
COLQ		1	1	27	0.037	No				COLQ	0.037
ACOX2		1	1	27	0.037	No				ACOX2	0.037
AXIN1		1	1	27	0.037	Yes				AXIN1	0.037
EOMES		1	1	27	0.037	No				EOMES	0.037
HIST1H2AB		1	1	27	0.037	No				HIST1H2AB	0.037
HIST1H4K		1	1	27	0.037	No				HIST1H4K	0.037
SOX14		1	1	27	0.037	No				SOX14	0.037
ULK1		1	1	27	0.037	No				ULK1	0.037
NSMAF		1	1	27	0.037	No				NSMAF	0.037
CUL4B		1	1	27	0.037	No				CUL4B	0.037
CUL1		1	1	27	0.037	No				CUL1	0.037
FOXN1		1	1	27	0.037	No				FOXN1	0.037
SUPT3H		1	1	27	0.037	No				SUPT3H	0.037
CDC42BPA		1	1	27	0.037	No				CDC42BPA	0.037
RGS5		1	1	27	0.037	No				RGS5	0.037
PRSS12		1	1	27	0.037	No				PRSS12	0.037
PPFIBP2		1	1	27	0.037	No				PPFIBP2	0.037
PPFIA4		1	1	27	0.037	No				PPFIA4	0.037
PPFIA2		1	1	27	0.037	No				PPFIA2	0.037
GCM1		1	1	27	0.037	No				GCM1	0.037
CYP4F2		1	1	27	0.037	No				CYP4F2	0.037
YBX3		1	1	27	0.037	No				YBX3	0.037
API5		1	1	27	0.037	No				API5	0.037
RRP1		1	1	27	0.037	No				RRP1	0.037
STK16		1	1	27	0.037	No				STK16	0.037
PDE8B		1	1	27	0.037	No				PDE8B	0.037
DNAH17		1	1	27	0.037	No				DNAH17	0.037
UNC5C		1	1	27	0.037	No				UNC5C	0.037
PCDHGB4		1	1	27	0.037	No				PCDHGB4	0.037
DCHS1		1	1	27	0.037	No				DCHS1	0.037
EIF3F		1	1	27	0.037	No				EIF3F	0.037
CDC23		1	1	27	0.037	No				CDC23	0.037
DNAH11		1	1	27	0.037	No				DNAH11	0.037
GBF1		1	1	27	0.037	No				GBF1	0.037
MTMR1		1	1	27	0.037	No				MTMR1	0.037
MPDZ		1	1	27	0.037	No				MPDZ	0.037
MATN4		1	1	27	0.037	No				MATN4	0.037
SUCLG1		1	1	27	0.037	No				SUCLG1	0.037
IL18RAP		1	1	27	0.037	No				IL18RAP	0.037
IL18R1		1	1	27	0.037	No				IL18R1	0.037
IQGAP1		1	1	27	0.037	No				IQGAP1	0.037
FCGBP		1	1	27	0.037	No				FCGBP	0.037
PER3		1	1	27	0.037	No				PER3	0.037
SLC5A6		1	1	27	0.037	No				SLC5A6	0.037
SGCE		1	1	27	0.037	No				SGCE	0.037
CACNA1I		1	1	27	0.037	No				CACNA1I	0.037
HERC3		1	1	27	0.037	No				HERC3	0.037
HERC2		1	1	27	0.037	No				HERC2	0.037
HIST1H3F		1	1	27	0.037	Yes				HIST1H3F	0.037
H1FX		1	1	27	0.037	No				H1FX	0.037
RPS6KA4		1	1	27	0.037	Yes				RPS6KA4	0.037
CDKL2		1	1	27	0.037	No				CDKL2	0.037
HIP1R		1	1	27	0.037	No				HIP1R	0.037
SEMA5A		1	1	27	0.037	No				SEMA5A	0.037
BTAF1		1	1	27	0.037	No				BTAF1	0.037
SH2D2A		1	1	27	0.037	No				SH2D2A	0.037
SLC13A2		1	1	27	0.037	No				SLC13A2	0.037
MAP3K6		1	1	27	0.037	Yes				MAP3K6	0.037
DNAJA3		1	1	27	0.037	No				DNAJA3	0.037
TBX19		1	1	27	0.037	No				TBX19	0.037
USP8		1	1	27	0.037	Yes				USP8	0.037
SLC16A4		1	1	27	0.037	No				SLC16A4	0.037
SMC3		1	1	27	0.037	Yes				SMC3	0.037
NEURL1		1	1	27	0.037	No				NEURL1	0.037
EXO1		1	1	27	0.037	No				EXO1	0.037
SCAF11		1	1	27	0.037	No				SCAF11	0.037
LPAR2		1	1	27	0.037	No				LPAR2	0.037
IL1RL1		1	1	27	0.037	No				IL1RL1	0.037
AP4M1		1	1	27	0.037	No				AP4M1	0.037
RASSF9		1	1	27	0.037	No				RASSF9	0.037
SLC24A1		1	1	27	0.037	No				SLC24A1	0.037
BMP15		1	1	27	0.037	No				BMP15	0.037
GCM2		1	1	27	0.037	No				GCM2	0.037
CACNA2D2		1	1	27	0.037	No				CACNA2D2	0.037
PIWIL1		1	1	27	0.037	No				PIWIL1	0.037
SRSF11		1	1	27	0.037	No				SRSF11	0.037
PTER		1	1	27	0.037	No				PTER	0.037
COPS2		1	1	27	0.037	No				COPS2	0.037
TRIP12		1	1	27	0.037	No				TRIP12	0.037
TRIP10		1	1	27	0.037	No				TRIP10	0.037
CD163		1	1	27	0.037	No				CD163	0.037
B4GALT5		1	1	27	0.037	No				B4GALT5	0.037
ZFYVE9		1	1	27	0.037	No				ZFYVE9	0.037
NRXN1		1	1	27	0.037	No				NRXN1	0.037
LIPG		1	1	27	0.037	No				LIPG	0.037
PEX16		1	1	27	0.037	No				PEX16	0.037
ECEL1		1	1	27	0.037	No				ECEL1	0.037
AIM2		1	1	27	0.037	No				AIM2	0.037
IL27RA		1	1	27	0.037	No				IL27RA	0.037
AKAP6		1	1	27	0.037	No				AKAP6	0.037
MYOT		1	1	27	0.037	No				MYOT	0.037
MAGED1		1	1	27	0.037	Yes				MAGED1	0.037
ADAMTS4		1	1	27	0.037	No				ADAMTS4	0.037
FXR2		1	1	27	0.037	No				FXR2	0.037
NPEPPS		1	1	27	0.037	No				NPEPPS	0.037
BAG3		1	1	27	0.037	No				BAG3	0.037
ZNF254		1	1	27	0.037	No				ZNF254	0.037
GABBR2		1	1	27	0.037	No				GABBR2	0.037
BABAM2		1	1	27	0.037	No				BABAM2	0.037
CDC42BPB		1	1	27	0.037	No				CDC42BPB	0.037
PRDX6		1	1	27	0.037	No				PRDX6	0.037
AATK		1	1	27	0.037	No				AATK	0.037
DEPDC5		1	1	27	0.037	No				DEPDC5	0.037
DHX34		1	1	27	0.037	No				DHX34	0.037
ST18		1	1	27	0.037	No				ST18	0.037
GPRIN2		1	1	27	0.037	No				GPRIN2	0.037
SEMA3E		1	1	27	0.037	No				SEMA3E	0.037
UTP14C		1	1	27	0.037	No				UTP14C	0.037
USP34		1	1	27	0.037	No				USP34	0.037
ZNF536		1	1	27	0.037	No				ZNF536	0.037
PHACTR2		1	1	27	0.037	No				PHACTR2	0.037
STARD8		1	1	27	0.037	No				STARD8	0.037
ZFYVE16		1	1	27	0.037	No				ZFYVE16	0.037
TM9SF4		1	1	27	0.037	No				TM9SF4	0.037
DLGAP5		1	1	27	0.037	No				DLGAP5	0.037
BMS1		1	1	27	0.037	No				BMS1	0.037
SFI1		1	1	27	0.037	No				SFI1	0.037
RB1CC1		1	1	27	0.037	No				RB1CC1	0.037
RGP1		1	1	27	0.037	No				RGP1	0.037
DNAJC6		1	1	27	0.037	No				DNAJC6	0.037
LCMT2		1	1	27	0.037	No				LCMT2	0.037
TESPA1		1	1	27	0.037	No				TESPA1	0.037
HEPH		1	1	27	0.037	No				HEPH	0.037
ELMO1		1	1	27	0.037	No				ELMO1	0.037
GAB2		1	1	27	0.037	Yes				GAB2	0.037
TRIM66		1	1	27	0.037	No				TRIM66	0.037
SETDB1		1	1	27	0.037	Yes				SETDB1	0.037
SEC24D		1	1	27	0.037	No				SEC24D	0.037
RBM19		1	1	27	0.037	No				RBM19	0.037
AP5Z1		1	1	27	0.037	No				AP5Z1	0.037
G3BP2		1	1	27	0.037	No				G3BP2	0.037
SUPT7L		1	1	27	0.037	No				SUPT7L	0.037
KIF14		1	1	27	0.037	No				KIF14	0.037
P2RY14		1	1	27	0.037	No				P2RY14	0.037
MAFB		1	1	27	0.037	Yes				MAFB	0.037
ARHGAP25		1	1	27	0.037	No				ARHGAP25	0.037
HS3ST3A1		1	1	27	0.037	No				HS3ST3A1	0.037
HS3ST2		1	1	27	0.037	No				HS3ST2	0.037
USP15		1	1	27	0.037	No				USP15	0.037
NR1H4		1	1	27	0.037	No				NR1H4	0.037
FGFBP1		1	1	27	0.037	No				FGFBP1	0.037
DMTF1		1	1	27	0.037	No				DMTF1	0.037
PPP4R1		1	1	27	0.037	No				PPP4R1	0.037
SLC12A6		1	1	27	0.037	No				SLC12A6	0.037
NAALAD2		1	1	27	0.037	No				NAALAD2	0.037
HCN4		1	1	27	0.037	No				HCN4	0.037
RANBP9		1	1	27	0.037	No				RANBP9	0.037
GJC1		1	1	27	0.037	No				GJC1	0.037
HUWE1		1	1	27	0.037	No				HUWE1	0.037
EDIL3		1	1	27	0.037	No				EDIL3	0.037
ACTR3		1	1	27	0.037	No				ACTR3	0.037
TRIM10		1	1	27	0.037	No				TRIM10	0.037
KIF20A		1	1	27	0.037	No				KIF20A	0.037
RASGRP1		1	1	27	0.037	No				RASGRP1	0.037
FRY		1	1	27	0.037	No				FRY	0.037
TENM1		1	1	27	0.037	No				TENM1	0.037
TNK2		1	1	27	0.037	No				TNK2	0.037
TSHZ1		1	1	27	0.037	No				TSHZ1	0.037
MPHOSPH9		1	1	27	0.037	No				MPHOSPH9	0.037
CALCRL		1	1	27	0.037	No				CALCRL	0.037
ANGPTL7		1	1	27	0.037	No				ANGPTL7	0.037
GDF11		1	1	27	0.037	No				GDF11	0.037
CD96		1	1	27	0.037	No				CD96	0.037
SRRM1		1	1	27	0.037	No				SRRM1	0.037
DENND4A		1	1	27	0.037	No				DENND4A	0.037
SF3B4		1	1	27	0.037	No				SF3B4	0.037
LILRB2		1	1	27	0.037	No				LILRB2	0.037
APC2		1	1	27	0.037	No				APC2	0.037
LANCL1		1	1	27	0.037	No				LANCL1	0.037
CRISP3		1	1	27	0.037	No				CRISP3	0.037
SIRPB1		1	1	27	0.037	No				SIRPB1	0.037
PKDREJ		1	1	27	0.037	No				PKDREJ	0.037
ABCA7		1	1	27	0.037	No				ABCA7	0.037
TUBB4A		1	1	27	0.037	No				TUBB4A	0.037
DLC1		1	1	27	0.037	No				DLC1	0.037
NDC80		1	1	27	0.037	No				NDC80	0.037
YAP1		1	1	27	0.037	Yes				YAP1	0.037
TIMM17A		1	1	27	0.037	No				TIMM17A	0.037
MERTK		1	1	27	0.037	Yes				MERTK	0.037
SLC9A6		1	1	27	0.037	No				SLC9A6	0.037
EIF3M		1	1	27	0.037	No				EIF3M	0.037
UNC13B		1	1	27	0.037	No				UNC13B	0.037
ZNF211		1	1	27	0.037	No				ZNF211	0.037
IPO8		1	1	27	0.037	No				IPO8	0.037
SLC35A1		1	1	27	0.037	No				SLC35A1	0.037
ARFGEF2		1	1	27	0.037	No				ARFGEF2	0.037
AKAP3		1	1	27	0.037	No				AKAP3	0.037
CCT2		1	1	27	0.037	No				CCT2	0.037
TACC2		1	1	27	0.037	No				TACC2	0.037
SLCO1B1		1	1	27	0.037	No				SLCO1B1	0.037
STAMBP		2	1	27	0.037	No				STAMBP	0.037
LEFTY1		1	1	27	0.037	No				LEFTY1	0.037
SCGB1D1		1	1	27	0.037	No				SCGB1D1	0.037
SPINT2		1	1	27	0.037	No				SPINT2	0.037
CELF2		1	1	27	0.037	No				CELF2	0.037
CD226		1	1	27	0.037	No				CD226	0.037
DCTN6		1	1	27	0.037	No				DCTN6	0.037
GNA13		1	1	27	0.037	Yes				GNA13	0.037
GNB5		1	1	27	0.037	No				GNB5	0.037
NRG3		1	1	27	0.037	No				NRG3	0.037
STAG3		1	1	27	0.037	No				STAG3	0.037
STAG2		1	1	27	0.037	Yes				STAG2	0.037
PHTF1		1	1	27	0.037	No				PHTF1	0.037
KIF1C		1	1	27	0.037	No				KIF1C	0.037
PLK2		1	1	27	0.037	Yes				PLK2	0.037
ZNF266		1	1	27	0.037	No				ZNF266	0.037
ZNF274		1	1	27	0.037	No				ZNF274	0.037
NCKAP1		1	1	27	0.037	No				NCKAP1	0.037
IQGAP2		1	1	27	0.037	No				IQGAP2	0.037
MTHFD2		1	1	27	0.037	No				MTHFD2	0.037
HSPH1		1	1	27	0.037	No				HSPH1	0.037
LILRB1		1	1	27	0.037	No				LILRB1	0.037
ADAM28		1	1	27	0.037	No				ADAM28	0.037
CFHR4		1	1	27	0.037	No				CFHR4	0.037
GPR83		1	1	27	0.037	No				GPR83	0.037
PPARGC1A		1	1	27	0.037	No				PPARGC1A	0.037
BRD8		1	1	27	0.037	No				BRD8	0.037
EDAR		1	1	27	0.037	No				EDAR	0.037
EHMT2		1	1	27	0.037	No				EHMT2	0.037
COPS8		1	1	27	0.037	No				COPS8	0.037
DBF4		1	1	27	0.037	No				DBF4	0.037
AP3M2		1	1	27	0.037	No				AP3M2	0.037
CLP1		1	1	27	0.037	Yes				CLP1	0.037
LILRB5		1	1	27	0.037	No				LILRB5	0.037
TLK2		1	1	27	0.037	No				TLK2	0.037
LILRA1		1	1	27	0.037	No				LILRA1	0.037
RBPMS		1	1	27	0.037	No				RBPMS	0.037
ADRM1		1	1	27	0.037	No				ADRM1	0.037
RAPGEF4		1	1	27	0.037	No				RAPGEF4	0.037
ADAMTS8		1	1	27	0.037	No				ADAMTS8	0.037
PRDM4		1	1	27	0.037	No				PRDM4	0.037
BTN3A2		1	1	27	0.037	No				BTN3A2	0.037
TBC1D8		1	1	27	0.037	No				TBC1D8	0.037
BAZ2A		1	1	27	0.037	No				BAZ2A	0.037
PKP3		1	1	27	0.037	No				PKP3	0.037
NISCH		1	1	27	0.037	No				NISCH	0.037
IRAK3		2	1	27	0.037	No				IRAK3	0.037
PDCD10		1	1	27	0.037	No				PDCD10	0.037
GPR176		1	1	27	0.037	No				GPR176	0.037
NXPH3		1	1	27	0.037	No				NXPH3	0.037
NXPH2		1	1	27	0.037	No				NXPH2	0.037
XPOT		1	1	27	0.037	No				XPOT	0.037
ATXN2L		1	1	27	0.037	No				ATXN2L	0.037
POU6F2		1	1	27	0.037	No				POU6F2	0.037
CD300A		1	1	27	0.037	No				CD300A	0.037
TMC6		1	1	27	0.037	No				TMC6	0.037
FKBP9		1	1	27	0.037	No				FKBP9	0.037
XRN2		1	1	27	0.037	No				XRN2	0.037
CEP162		1	1	27	0.037	No				CEP162	0.037
RHOBTB3		1	1	27	0.037	No				RHOBTB3	0.037
DLGAP4		1	1	27	0.037	No				DLGAP4	0.037
FRMPD1		1	1	27	0.037	No				FRMPD1	0.037
CHSY1		1	1	27	0.037	No				CHSY1	0.037
ICK		1	1	27	0.037	Yes				ICK	0.037
FOXJ3		1	1	27	0.037	No				FOXJ3	0.037
KHDC4		1	1	27	0.037	No				KHDC4	0.037
ARHGEF15		1	1	27	0.037	No				ARHGEF15	0.037
BTBD3		1	1	27	0.037	No				BTBD3	0.037
TRAK1		1	1	27	0.037	No				TRAK1	0.037
FAN1		1	1	27	0.037	No				FAN1	0.037
SIRT2		1	1	27	0.037	No				SIRT2	0.037
SCAP		1	1	27	0.037	No				SCAP	0.037
SHANK2		1	1	27	0.037	No				SHANK2	0.037
DIP2C		1	1	27	0.037	No				DIP2C	0.037
MYH15		1	1	27	0.037	No				MYH15	0.037
PCNX1		1	1	27	0.037	No				PCNX1	0.037
WDFY3		1	1	27	0.037	No				WDFY3	0.037
DAAM1		1	1	27	0.037	No				DAAM1	0.037
PLCH1		1	1	27	0.037	No				PLCH1	0.037
DOP1A		1	1	27	0.037	No				DOP1A	0.037
TNIK		1	1	27	0.037	No				TNIK	0.037
PDS5B		1	1	27	0.037	Yes				PDS5B	0.037
SMG1		1	1	27	0.037	Yes				SMG1	0.037
NCOA6		1	1	27	0.037	No				NCOA6	0.037
NMNAT2		1	1	27	0.037	No				NMNAT2	0.037
CMTR1		1	1	27	0.037	No				CMTR1	0.037
HECW1		1	1	27	0.037	No				HECW1	0.037
UHRF1BP1L		1	1	27	0.037	No				UHRF1BP1L	0.037
VWA8		1	1	27	0.037	No				VWA8	0.037
KDM4C		1	1	27	0.037	Yes				KDM4C	0.037
PPRC1		1	1	27	0.037	No				PPRC1	0.037
EXPH5		1	1	27	0.037	No				EXPH5	0.037
ZNF423		1	1	27	0.037	No				ZNF423	0.037
FSTL4		1	1	27	0.037	No				FSTL4	0.037
CUL9		1	1	27	0.037	No				CUL9	0.037
POGZ		1	1	27	0.037	No				POGZ	0.037
ATG2A		1	1	27	0.037	No				ATG2A	0.037
EPB41L3		1	1	27	0.037	No				EPB41L3	0.037
LRCH1		1	1	27	0.037	No				LRCH1	0.037
NUP205		1	1	27	0.037	No				NUP205	0.037
LPIN1		1	1	27	0.037	No				LPIN1	0.037
CEP68		1	1	27	0.037	No				CEP68	0.037
UBXN4		1	1	27	0.037	No				UBXN4	0.037
CYFIP1		1	1	27	0.037	No				CYFIP1	0.037
MDN1		1	1	27	0.037	No				MDN1	0.037
FAM120A		2	1	27	0.037	No				FAM120A	0.037
NBEAL2		1	1	27	0.037	No				NBEAL2	0.037
PLCB1		1	1	27	0.037	No				PLCB1	0.037
ATP11A		1	1	27	0.037	No				ATP11A	0.037
MTCL1		1	1	27	0.037	No				MTCL1	0.037
CAMTA1		1	1	27	0.037	Yes				CAMTA1	0.037
MCF2L		1	1	27	0.037	No				MCF2L	0.037
TSPYL4		1	1	27	0.037	No				TSPYL4	0.037
KLHL18		1	1	27	0.037	No				KLHL18	0.037
MTUS2		1	1	27	0.037	No				MTUS2	0.037
WWC1		1	1	27	0.037	No				WWC1	0.037
ANKS1A		1	1	27	0.037	No				ANKS1A	0.037
ATMIN		1	1	27	0.037	No				ATMIN	0.037
KIF13B		1	1	27	0.037	No				KIF13B	0.037
ACSL6		1	1	27	0.037	Yes				ACSL6	0.037
NCAPD3		1	1	27	0.037	No				NCAPD3	0.037
DMXL2		1	1	27	0.037	No				DMXL2	0.037
CUX2		1	1	27	0.037	No				CUX2	0.037
DNAJC13		1	1	27	0.037	No				DNAJC13	0.037
HAUS5		1	1	27	0.037	No				HAUS5	0.037
VPS8		1	1	27	0.037	No				VPS8	0.037
USP24		1	1	27	0.037	No				USP24	0.037
FNBP4		1	1	27	0.037	No				FNBP4	0.037
KIAA0895		1	1	27	0.037	No				KIAA0895	0.037
AHCYL2		1	1	27	0.037	No				AHCYL2	0.037
SIK3		1	1	27	0.037	No				SIK3	0.037
ZFPM2		1	1	27	0.037	No				ZFPM2	0.037
KCNH3		1	1	27	0.037	No				KCNH3	0.037
MLYCD		1	1	27	0.037	No				MLYCD	0.037
CRB1		1	1	27	0.037	No				CRB1	0.037
AP4E1		1	1	27	0.037	No				AP4E1	0.037
SLC44A1		1	1	27	0.037	No				SLC44A1	0.037
ABCB10		1	1	27	0.037	No				ABCB10	0.037
ABCA5		1	1	27	0.037	No				ABCA5	0.037
CBX5		1	1	27	0.037	No				CBX5	0.037
CAPN7		1	1	27	0.037	No				CAPN7	0.037
MTREX		1	1	27	0.037	No				MTREX	0.037
SEZ6L		1	1	27	0.037	No				SEZ6L	0.037
TSPAN12		1	1	27	0.037	No				TSPAN12	0.037
KLHDC2		1	1	27	0.037	No				KLHDC2	0.037
PDSS1		1	1	27	0.037	No				PDSS1	0.037
NUP62		1	1	27	0.037	No				NUP62	0.037
LDOC1		1	1	27	0.037	No				LDOC1	0.037
TRIM29		1	1	27	0.037	No				TRIM29	0.037
NPAP1		1	1	27	0.037	No				NPAP1	0.037
POTEH		1	1	27	0.037	No				POTEH	0.037
KIF4A		1	1	27	0.037	No				KIF4A	0.037
LMOD1		1	1	27	0.037	No				LMOD1	0.037
SPDEF		1	1	27	0.037	No				SPDEF	0.037
NBPF14		1	1	27	0.037	No				NBPF14	0.037
POLR1A		1	1	27	0.037	No				POLR1A	0.037
ABI3BP		1	1	27	0.037	No				ABI3BP	0.037
PAMR1		1	1	27	0.037	No				PAMR1	0.037
TRIM58		1	1	27	0.037	No				TRIM58	0.037
PLEKHG4		1	1	27	0.037	No				PLEKHG4	0.037
RTTN		1	1	27	0.037	No				RTTN	0.037
CLIC4		1	1	27	0.037	No				CLIC4	0.037
C20ORF194		1	1	27	0.037	No				C20ORF194	0.037
VIRMA		1	1	27	0.037	No				VIRMA	0.037
SH2B1		1	1	27	0.037	No				SH2B1	0.037
TIPARP		1	1	27	0.037	Yes				TIPARP	0.037
NGDN		1	1	27	0.037	No				NGDN	0.037
CLIP3		1	1	27	0.037	No				CLIP3	0.037
TENM4		1	1	27	0.037	No				TENM4	0.037
L3MBTL1		1	1	27	0.037	No				L3MBTL1	0.037
SETBP1		1	1	27	0.037	Yes				SETBP1	0.037
LTN1		1	1	27	0.037	No				LTN1	0.037
SLITRK5		1	1	27	0.037	No				SLITRK5	0.037
AUTS2		1	1	27	0.037	No				AUTS2	0.037
ARHGEF26		1	1	27	0.037	No				ARHGEF26	0.037
HERC4		1	1	27	0.037	No				HERC4	0.037
WSB1		1	1	27	0.037	No				WSB1	0.037
EPC2		1	1	27	0.037	No				EPC2	0.037
TRPC4AP		1	1	27	0.037	No				TRPC4AP	0.037
TRAF3IP1		1	1	27	0.037	No				TRAF3IP1	0.037
TIAM2		1	1	27	0.037	No				TIAM2	0.037
FAM50B		1	1	27	0.037	No				FAM50B	0.037
OR2K2		1	1	27	0.037	No				OR2K2	0.037
BLOC1S6		1	1	27	0.037	No				BLOC1S6	0.037
FBXO5		1	1	27	0.037	No				FBXO5	0.037
AGO1		1	1	27	0.037	Yes				AGO1	0.037
DAZAP1		1	1	27	0.037	No				DAZAP1	0.037
OR10H1		1	1	27	0.037	No				OR10H1	0.037
CKAP2		1	1	27	0.037	No				CKAP2	0.037
OR8B2		1	1	27	0.037	No				OR8B2	0.037
OPLAH		1	1	27	0.037	No				OPLAH	0.037
RANBP6		1	1	27	0.037	No				RANBP6	0.037
CYFIP2		1	1	27	0.037	No				CYFIP2	0.037
NPTN		1	1	27	0.037	No				NPTN	0.037
NPHP3		1	1	27	0.037	No				NPHP3	0.037
SND1		1	1	27	0.037	Yes				SND1	0.037
VPS41		1	1	27	0.037	No				VPS41	0.037
CACNG5		1	1	27	0.037	No				CACNG5	0.037
DKK2		1	1	27	0.037	Yes				DKK2	0.037
INPP5J		1	1	27	0.037	No				INPP5J	0.037
SMC1B		1	1	27	0.037	No				SMC1B	0.037
DENND2A		1	1	27	0.037	No				DENND2A	0.037
IL17B		1	1	27	0.037	No				IL17B	0.037
SESN1		1	1	27	0.037	Yes				SESN1	0.037
KLHL20		1	1	27	0.037	No				KLHL20	0.037
MOCS3		1	1	27	0.037	No				MOCS3	0.037
ZNF330		1	1	27	0.037	No				ZNF330	0.037
TMEM97		1	1	27	0.037	No				TMEM97	0.037
PPP2R3B		1	1	27	0.037	No				PPP2R3B	0.037
SLCO3A1		1	1	27	0.037	No				SLCO3A1	0.037
IGHV3-35		1	1	27	0.037	No				IGHV3-35	0.037
DLL1		1	1	27	0.037	No				DLL1	0.037
TRBV28		1	1	27	0.037	No				TRBV28	0.037
TRBV19		1	1	27	0.037	No				TRBV19	0.037
TRAV40		1	1	27	0.037	No				TRAV40	0.037
TRAV13-1		1	1	27	0.037	No				TRAV13-1	0.037
TRAV8-7		1	1	27	0.037	No				TRAV8-7	0.037
TRAV2		1	1	27	0.037	No				TRAV2	0.037
IGLV3-9		1	1	27	0.037	No				IGLV3-9	0.037
IGLV1-47		1	1	27	0.037	No				IGLV1-47	0.037
IGKV1D-42		1	1	27	0.037	No				IGKV1D-42	0.037
IGKV1D-17		1	1	27	0.037	No				IGKV1D-17	0.037
SLC6A16		1	1	27	0.037	No				SLC6A16	0.037
ATAD2		1	1	27	0.037	No				ATAD2	0.037
CCDC113		1	1	27	0.037	No				CCDC113	0.037
SETD2		1	1	27	0.037	Yes				SETD2	0.037
RANGRF		1	1	27	0.037	No				RANGRF	0.037
FHOD1		1	1	27	0.037	No				FHOD1	0.037
RACGAP1		1	1	27	0.037	No				RACGAP1	0.037
USP25		1	1	27	0.037	No				USP25	0.037
TMOD3		1	1	27	0.037	No				TMOD3	0.037
NCAPH2		1	1	27	0.037	No				NCAPH2	0.037
GRHL1		1	1	27	0.037	No				GRHL1	0.037
TFPT		1	1	27	0.037	Yes				TFPT	0.037
UBN1		1	1	27	0.037	No				UBN1	0.037
STRN4		1	1	27	0.037	No				STRN4	0.037
HOOK2		1	1	27	0.037	No				HOOK2	0.037
RMC1		1	1	27	0.037	No				RMC1	0.037
EPN1		1	1	27	0.037	No				EPN1	0.037
ALG6		1	1	27	0.037	No				ALG6	0.037
DNMT3L		1	1	27	0.037	No				DNMT3L	0.037
LRP12		1	1	27	0.037	No				LRP12	0.037
UBQLN2		1	1	27	0.037	No				UBQLN2	0.037
OBP2A		1	1	27	0.037	No				OBP2A	0.037
PILRA		1	1	27	0.037	No				PILRA	0.037
FSCN3		1	1	27	0.037	No				FSCN3	0.037
SH3KBP1		1	1	27	0.037	No				SH3KBP1	0.037
RAX		1	1	27	0.037	No				RAX	0.037
DNTTIP2		1	1	27	0.037	No				DNTTIP2	0.037
CDR2L		1	1	27	0.037	No				CDR2L	0.037
KLK14		1	1	27	0.037	No				KLK14	0.037
ZBTB21		1	1	27	0.037	No				ZBTB21	0.037
SCAPER		1	1	27	0.037	No				SCAPER	0.037
CRNN		1	1	27	0.037	No				CRNN	0.037
PLA2G3		2	1	27	0.037	No				PLA2G3	0.037
COL5A3		1	1	27	0.037	No				COL5A3	0.037
PODXL2		1	1	27	0.037	No				PODXL2	0.037
UBQLN3		1	1	27	0.037	No				UBQLN3	0.037
NEUROG3		1	1	27	0.037	No				NEUROG3	0.037
ASAP1		1	1	27	0.037	No				ASAP1	0.037
NSDHL		1	1	27	0.037	No				NSDHL	0.037
RNF141		1	1	27	0.037	No				RNF141	0.037
NTM		1	1	27	0.037	No				NTM	0.037
IMPG2		1	1	27	0.037	No				IMPG2	0.037
ASCC1		1	1	27	0.037	No				ASCC1	0.037
RRP15		1	1	27	0.037	No				RRP15	0.037
TVP23B		1	1	27	0.037	No				TVP23B	0.037
UBXN1		1	1	27	0.037	No				UBXN1	0.037
ZBTB7B		1	1	27	0.037	No				ZBTB7B	0.037
FAM135B		1	1	27	0.037	No				FAM135B	0.037
MEMO1		1	1	27	0.037	No				MEMO1	0.037
YBX2		1	1	27	0.037	No				YBX2	0.037
NDUFAF1		1	1	27	0.037	No				NDUFAF1	0.037
COPS4		1	1	27	0.037	No				COPS4	0.037
SLC45A2		1	1	27	0.037	No				SLC45A2	0.037
GLTP		1	1	27	0.037	No				GLTP	0.037
PHF20		1	1	27	0.037	No				PHF20	0.037
CRIM1		1	1	27	0.037	No				CRIM1	0.037
ZNF571		1	1	27	0.037	No				ZNF571	0.037
THEG		1	1	27	0.037	No				THEG	0.037
NME8		1	1	27	0.037	No				NME8	0.037
DACT1		1	1	27	0.037	No				DACT1	0.037
PLA1A		1	1	27	0.037	No				PLA1A	0.037
UBR5		1	1	27	0.037	Yes				UBR5	0.037
ANGPT4		1	1	27	0.037	No				ANGPT4	0.037
POLK		1	1	27	0.037	No				POLK	0.037
ZNF107		1	1	27	0.037	No				ZNF107	0.037
ANAPC5		1	1	27	0.037	No				ANAPC5	0.037
ANAPC7		1	1	27	0.037	No				ANAPC7	0.037
REV1		1	1	27	0.037	No				REV1	0.037
ISYNA1		1	1	27	0.037	No				ISYNA1	0.037
GTSE1		1	1	27	0.037	Yes				GTSE1	0.037
LGSN		1	1	27	0.037	No				LGSN	0.037
NOP58		1	1	27	0.037	No				NOP58	0.037
TAF9B		1	1	27	0.037	No				TAF9B	0.037
STYXL1		1	1	27	0.037	No				STYXL1	0.037
ZFR		1	1	27	0.037	No				ZFR	0.037
HECA		1	1	27	0.037	No				HECA	0.037
VPS29		1	1	27	0.037	No				VPS29	0.037
RAB23		1	1	27	0.037	No				RAB23	0.037
DNAJB11		1	1	27	0.037	No				DNAJB11	0.037
LUC7L3		1	1	27	0.037	No				LUC7L3	0.037
CDK12		1	1	27	0.037	Yes				CDK12	0.037
SYT17		1	1	27	0.037	No				SYT17	0.037
ATP8A2		1	1	27	0.037	No				ATP8A2	0.037
RSF1		1	1	27	0.037	No				RSF1	0.037
SIX4		1	1	27	0.037	No				SIX4	0.037
ADA2		1	1	27	0.037	No				ADA2	0.037
BCL11A		1	1	27	0.037	Yes				BCL11A	0.037
CPXCR1		1	1	27	0.037	No				CPXCR1	0.037
TM6SF1		1	1	27	0.037	No				TM6SF1	0.037
FGFRL1		1	1	27	0.037	No				FGFRL1	0.037
GPR87		1	1	27	0.037	No				GPR87	0.037
MYO3A		1	1	27	0.037	No				MYO3A	0.037
PPIL3		1	1	27	0.037	No				PPIL3	0.037
KCNK10		1	1	27	0.037	No				KCNK10	0.037
SNTG1		1	1	27	0.037	No				SNTG1	0.037
NLGN3		1	1	27	0.037	No				NLGN3	0.037
SH3TC1		1	1	27	0.037	No				SH3TC1	0.037
SEMA5B		1	1	27	0.037	No				SEMA5B	0.037
XRN1		1	1	27	0.037	No				XRN1	0.037
ANKIB1		1	1	27	0.037	No				ANKIB1	0.037
ARMCX6		1	1	27	0.037	No				ARMCX6	0.037
UGT2B28		1	1	27	0.037	No				UGT2B28	0.037
RBM47		1	1	27	0.037	No				RBM47	0.037
DHX29		1	1	27	0.037	No				DHX29	0.037
DDX4		1	1	27	0.037	Yes				DDX4	0.037
APBB1IP		1	1	27	0.037	No				APBB1IP	0.037
CCDC93		1	1	27	0.037	No				CCDC93	0.037
MIER2		1	1	27	0.037	No				MIER2	0.037
ROBO4		1	1	27	0.037	No				ROBO4	0.037
MAGEL2		1	1	27	0.037	No				MAGEL2	0.037
UGT1A10		1	1	27	0.037	No				UGT1A10	0.037
L1TD1		1	1	27	0.037	No				L1TD1	0.037
MINDY2		1	1	27	0.037	No				MINDY2	0.037
PDP1		1	1	27	0.037	No				PDP1	0.037
CNGB3		1	1	27	0.037	No				CNGB3	0.037
GRAMD1C		1	1	27	0.037	No				GRAMD1C	0.037
HYDIN		2	1	27	0.037	No				HYDIN	0.037
TRPM4		1	1	27	0.037	No				TRPM4	0.037
BNC2		1	1	27	0.037	No				BNC2	0.037
DCHS2		1	1	27	0.037	No				DCHS2	0.037
MBTD1		1	1	27	0.037	No				MBTD1	0.037
KLHL24		1	1	27	0.037	No				KLHL24	0.037
NXPE4		1	1	27	0.037	No				NXPE4	0.037
BCAS3		1	1	27	0.037	No				BCAS3	0.037
NUP62CL		1	1	27	0.037	No				NUP62CL	0.037
VPS13C		1	1	27	0.037	No				VPS13C	0.037
SIDT1		1	1	27	0.037	No				SIDT1	0.037
GDPD2		1	1	27	0.037	No				GDPD2	0.037
SNRK		1	1	27	0.037	No				SNRK	0.037
BCOR		1	1	27	0.037	Yes				BCOR	0.037
TEX10		1	1	27	0.037	No				TEX10	0.037
ANKHD1		1	1	27	0.037	No				ANKHD1	0.037
CWC25		1	1	27	0.037	No				CWC25	0.037
UHRF1BP1		1	1	27	0.037	No				UHRF1BP1	0.037
NCAPG2		1	1	27	0.037	No				NCAPG2	0.037
NSD3		1	1	27	0.037	Yes				NSD3	0.037
DNAAF5		1	1	27	0.037	No				DNAAF5	0.037
SOHLH2		1	1	27	0.037	No				SOHLH2	0.037
LPCAT2		1	1	27	0.037	No				LPCAT2	0.037
C1ORF56		1	1	27	0.037	No				C1ORF56	0.037
C20ORF27		1	1	27	0.037	No				C20ORF27	0.037
OXSM		3	1	27	0.037	No				OXSM	0.037
TMCO3		1	1	27	0.037	No				TMCO3	0.037
RMND1		1	1	27	0.037	No				RMND1	0.037
PARPBP		1	1	27	0.037	No				PARPBP	0.037
TRMT12		1	1	27	0.037	No				TRMT12	0.037
MRPL20		1	1	27	0.037	No				MRPL20	0.037
CRYBG2		1	1	27	0.037	No				CRYBG2	0.037
SLC52A1		1	1	27	0.037	No				SLC52A1	0.037
OXR1		1	1	27	0.037	No				OXR1	0.037
RADX		1	1	27	0.037	No				RADX	0.037
ATG2B		1	1	27	0.037	No				ATG2B	0.037
AGGF1		1	1	27	0.037	No				AGGF1	0.037
CEP192		1	1	27	0.037	No				CEP192	0.037
RBM28		1	1	27	0.037	No				RBM28	0.037
RFWD3		1	1	27	0.037	No				RFWD3	0.037
RMDN3		1	1	27	0.037	No				RMDN3	0.037
VPS13D		1	1	27	0.037	No				VPS13D	0.037
PBRM1		1	1	27	0.037	Yes				PBRM1	0.037
RESF1		1	1	27	0.037	No				RESF1	0.037
APPL2		1	1	27	0.037	No				APPL2	0.037
MAP1S		1	1	27	0.037	No				MAP1S	0.037
DPPA4		1	1	27	0.037	No				DPPA4	0.037
MOB1A		1	1	27	0.037	No				MOB1A	0.037
TYW1		1	1	27	0.037	No				TYW1	0.037
ZNF654		1	1	27	0.037	No				ZNF654	0.037
ACER3		1	1	27	0.037	No				ACER3	0.037
ZGRF1		1	1	27	0.037	No				ZGRF1	0.037
HEMGN		1	1	27	0.037	No				HEMGN	0.037
SIRPG		1	1	27	0.037	No				SIRPG	0.037
YOD1		1	1	27	0.037	No				YOD1	0.037
DNAJA4		1	1	27	0.037	No				DNAJA4	0.037
NDUFAF7		1	1	27	0.037	No				NDUFAF7	0.037
TRPV6		1	1	27	0.037	No				TRPV6	0.037
MAML3		1	1	27	0.037	No				MAML3	0.037
DNAH3		1	1	27	0.037	No				DNAH3	0.037
STAB2		1	1	27	0.037	No				STAB2	0.037
ANKRD10		1	1	27	0.037	No				ANKRD10	0.037
DOCK10		1	1	27	0.037	No				DOCK10	0.037
TRMT1		1	1	27	0.037	No				TRMT1	0.037
POMGNT1		1	1	27	0.037	No				POMGNT1	0.037
ZDHHC7		1	1	27	0.037	No				ZDHHC7	0.037
SMPD4		1	1	27	0.037	No				SMPD4	0.037
SLC39A4		1	1	27	0.037	No				SLC39A4	0.037
RAB20		1	1	27	0.037	No				RAB20	0.037
RNF126		1	1	27	0.037	No				RNF126	0.037
NBPF1		1	1	27	0.037	No				NBPF1	0.037
KANSL3		1	1	27	0.037	No				KANSL3	0.037
YEATS2		1	1	27	0.037	No				YEATS2	0.037
ZFP64		1	1	27	0.037	No				ZFP64	0.037
EDEM2		1	1	27	0.037	No				EDEM2	0.037
CCAR1		1	1	27	0.037	No				CCAR1	0.037
UGGT2		1	1	27	0.037	No				UGGT2	0.037
DHX32		1	1	27	0.037	No				DHX32	0.037
ZNF415		1	1	27	0.037	No				ZNF415	0.037
ST6GALNAC1		1	1	27	0.037	No				ST6GALNAC1	0.037
BDP1		1	1	27	0.037	No				BDP1	0.037
WWC3		1	1	27	0.037	No				WWC3	0.037
ARHGAP15		1	1	27	0.037	No				ARHGAP15	0.037
USE1		1	1	27	0.037	No				USE1	0.037
GABRQ		1	1	27	0.037	No				GABRQ	0.037
MYNN		1	1	27	0.037	No				MYNN	0.037
THSD1		1	1	27	0.037	No				THSD1	0.037
KMT2E		1	1	27	0.037	No				KMT2E	0.037
BIN3		1	1	27	0.037	No				BIN3	0.037
APOBR		1	1	27	0.037	No				APOBR	0.037
MYO5C		1	1	27	0.037	No				MYO5C	0.037
PCDHGB3		1	1	27	0.037	No				PCDHGB3	0.037
PCDHGA4		1	1	27	0.037	No				PCDHGA4	0.037
PCDHB14		1	1	27	0.037	No				PCDHB14	0.037
PCDHB8		1	1	27	0.037	No				PCDHB8	0.037
PCDHB6		1	1	27	0.037	No				PCDHB6	0.037
PCDHB4		2	1	27	0.037	No				PCDHB4	0.037
PCDHA13		1	1	27	0.037	No				PCDHA13	0.037
PCDHA12		1	1	27	0.037	No				PCDHA12	0.037
PCDHA8		1	1	27	0.037	No				PCDHA8	0.037
PCDHA1		2	1	27	0.037	No				PCDHA1	0.037
TEX14		1	1	27	0.037	No				TEX14	0.037
STK31		1	1	27	0.037	No				STK31	0.037
GSDMC		1	1	27	0.037	No				GSDMC	0.037
FAM214A		1	1	27	0.037	No				FAM214A	0.037
SERTAD4		1	1	27	0.037	No				SERTAD4	0.037
KYAT3		1	1	27	0.037	No				KYAT3	0.037
IRGC		1	1	27	0.037	No				IRGC	0.037
DNAJC12		1	1	27	0.037	No				DNAJC12	0.037
CYP26B1		1	1	27	0.037	No				CYP26B1	0.037
C11ORF16		1	1	27	0.037	No				C11ORF16	0.037
FMN2		1	1	27	0.037	No				FMN2	0.037
ZC3HAV1		1	1	27	0.037	No				ZC3HAV1	0.037
DPYSL5		1	1	27	0.037	No				DPYSL5	0.037
FEM1C		1	1	27	0.037	No				FEM1C	0.037
DUSP22		1	1	27	0.037	Yes				DUSP22	0.037
NT5M		1	1	27	0.037	No				NT5M	0.037
ATXN7L3		1	1	27	0.037	No				ATXN7L3	0.037
STOX2		1	1	27	0.037	No				STOX2	0.037
PRDM10		1	1	27	0.037	No				PRDM10	0.037
ADPRM		1	1	27	0.037	No				ADPRM	0.037
DTWD1		1	1	27	0.037	No				DTWD1	0.037
RSRP1		1	1	27	0.037	No				RSRP1	0.037
TWSG1		1	1	27	0.037	No				TWSG1	0.037
KNL1		1	1	27	0.037	Yes				KNL1	0.037
CASS4		1	1	27	0.037	No				CASS4	0.037
CYSLTR2		1	1	27	0.037	Yes				CYSLTR2	0.037
REXO4		1	1	27	0.037	No				REXO4	0.037
INTS12		1	1	27	0.037	No				INTS12	0.037
CAMK1D		1	1	27	0.037	No				CAMK1D	0.037
CHMP1B		1	1	27	0.037	No				CHMP1B	0.037
RTN4		1	1	27	0.037	No				RTN4	0.037
SLC44A2		1	1	27	0.037	No				SLC44A2	0.037
SALL4		1	1	27	0.037	Yes				SALL4	0.037
ADAMTSL3		1	1	27	0.037	No				ADAMTSL3	0.037
ARFGEF3		1	1	27	0.037	No				ARFGEF3	0.037
SNX14		1	1	27	0.037	No				SNX14	0.037
ZNF630		1	1	27	0.037	No				ZNF630	0.037
SLC4A10		1	1	27	0.037	No				SLC4A10	0.037
RHOJ		2	1	27	0.037	No				RHOJ	0.037
LRTM1		1	1	27	0.037	No				LRTM1	0.037
SLC24A3		1	1	27	0.037	No				SLC24A3	0.037
BIRC6		1	1	27	0.037	No				BIRC6	0.037
TENM2		1	1	27	0.037	No				TENM2	0.037
REXO1		1	1	27	0.037	No				REXO1	0.037
PPM1H		1	1	27	0.037	No				PPM1H	0.037
GRAMD1B		1	1	27	0.037	No				GRAMD1B	0.037
SHROOM4		1	1	27	0.037	No				SHROOM4	0.037
PLEKHG1		1	1	27	0.037	No				PLEKHG1	0.037
KIAA1210		1	1	27	0.037	No				KIAA1210	0.037
ODF2L		1	1	27	0.037	No				ODF2L	0.037
MRTFB		1	1	27	0.037	No				MRTFB	0.037
NLGN4X		1	1	27	0.037	No				NLGN4X	0.037
COG6		1	1	27	0.037	No				COG6	0.037
HECW2		1	1	27	0.037	No				HECW2	0.037
HACE1		1	1	27	0.037	No				HACE1	0.037
SORCS2		1	1	27	0.037	No				SORCS2	0.037
CC2D2A		1	1	27	0.037	No				CC2D2A	0.037
DOCK6		1	1	27	0.037	No				DOCK6	0.037
TMEM181		1	1	27	0.037	No				TMEM181	0.037
TSHZ3		1	1	27	0.037	No				TSHZ3	0.037
KLHL1		1	1	27	0.037	No				KLHL1	0.037
DPP10		1	1	27	0.037	No				DPP10	0.037
GRAMD1A		1	1	27	0.037	No				GRAMD1A	0.037
PLEKHA4		1	1	27	0.037	No				PLEKHA4	0.037
EPB41L5		1	1	27	0.037	No				EPB41L5	0.037
CACHD1		1	1	27	0.037	No				CACHD1	0.037
LRRC4C		1	1	27	0.037	No				LRRC4C	0.037
NCKAP5L		2	1	27	0.037	No				NCKAP5L	0.037
GBA2		1	1	27	0.037	No				GBA2	0.037
GPR107		1	1	27	0.037	No				GPR107	0.037
SPTBN4		1	1	27	0.037	No				SPTBN4	0.037
GBA3		1	1	27	0.037	No				GBA3	0.037
SLAMF7		1	1	27	0.037	No				SLAMF7	0.037
ZP4		1	1	27	0.037	No				ZP4	0.037
ZNF462		1	1	27	0.037	No				ZNF462	0.037
RRAGD		1	1	27	0.037	No				RRAGD	0.037
PRDM13		1	1	27	0.037	No				PRDM13	0.037
ALOXE3		1	1	27	0.037	No				ALOXE3	0.037
KLHL12		1	1	27	0.037	No				KLHL12	0.037
TSKS		1	1	27	0.037	No				TSKS	0.037
CDH26		1	1	27	0.037	No				CDH26	0.037
THADA		1	1	27	0.037	No				THADA	0.037
FAM111A		1	1	27	0.037	No				FAM111A	0.037
NAPB		1	1	27	0.037	No				NAPB	0.037
ZBED8		1	1	27	0.037	No				ZBED8	0.037
TNN		1	1	27	0.037	No				TNN	0.037
CLSTN2		1	1	27	0.037	No				CLSTN2	0.037
DUS1L		1	1	27	0.037	No				DUS1L	0.037
NOD2		1	1	27	0.037	No				NOD2	0.037
NCAPG		1	1	27	0.037	No				NCAPG	0.037
LHX5		1	1	27	0.037	No				LHX5	0.037
MS4A6A		1	1	27	0.037	No				MS4A6A	0.037
ABCG8		1	1	27	0.037	No				ABCG8	0.037
NSD1		1	1	27	0.037	Yes				NSD1	0.037
COP1		1	1	27	0.037	Yes				COP1	0.037
KLHL25		1	1	27	0.037	No				KLHL25	0.037
CIAO3		1	1	27	0.037	No				CIAO3	0.037
NOM1		1	1	27	0.037	No				NOM1	0.037
CSMD1		1	1	27	0.037	No				CSMD1	0.037
NDST4		1	1	27	0.037	No				NDST4	0.037
GIGYF1		1	1	27	0.037	No				GIGYF1	0.037
CTAGE1		1	1	27	0.037	No				CTAGE1	0.037
METTL17		1	1	27	0.037	No				METTL17	0.037
SMURF2		1	1	27	0.037	No				SMURF2	0.037
ZNF574		1	1	27	0.037	No				ZNF574	0.037
CREB3L2		1	1	27	0.037	Yes				CREB3L2	0.037
MEAF6		1	1	27	0.037	No				MEAF6	0.037
MICAL1		1	1	27	0.037	No				MICAL1	0.037
EFCAB6		1	1	27	0.037	No				EFCAB6	0.037
FNDC4		1	1	27	0.037	No				FNDC4	0.037
2020-03-07		1	1	27	0.037	No				2020-03-07	0.037
DCLRE1B		1	1	27	0.037	No				DCLRE1B	0.037
ARMCX5		1	1	27	0.037	No				ARMCX5	0.037
MRPS15		1	1	27	0.037	No				MRPS15	0.037
NDRG4		1	1	27	0.037	No				NDRG4	0.037
PRAMEF1		1	1	27	0.037	No				PRAMEF1	0.037
SOWAHC		1	1	27	0.037	No				SOWAHC	0.037
ZFP69B		1	1	27	0.037	No				ZFP69B	0.037
CAPRIN2		1	1	27	0.037	No				CAPRIN2	0.037
AACS		1	1	27	0.037	No				AACS	0.037
TMEM108		1	1	27	0.037	No				TMEM108	0.037
CYP4F12		1	1	27	0.037	No				CYP4F12	0.037
PRR14		1	1	27	0.037	No				PRR14	0.037
AHNAK		1	1	27	0.037	No				AHNAK	0.037
SECISBP2		1	1	27	0.037	No				SECISBP2	0.037
FASTKD3		2	1	27	0.037	No				FASTKD3	0.037
MBOAT7		1	1	27	0.037	No				MBOAT7	0.037
FSD1		1	1	27	0.037	No				FSD1	0.037
IRX1		1	1	27	0.037	No				IRX1	0.037
OR51G1		1	1	27	0.037	No				OR51G1	0.037
NOX5		1	1	27	0.037	No				NOX5	0.037
RNF128		1	1	27	0.037	No				RNF128	0.037
TANGO6		1	1	27	0.037	No				TANGO6	0.037
GALNT14		1	1	27	0.037	No				GALNT14	0.037
SH3TC2		1	1	27	0.037	No				SH3TC2	0.037
FAT4		1	1	27	0.037	Yes				FAT4	0.037
SCRN3		1	1	27	0.037	No				SCRN3	0.037
MCPH1		1	1	27	0.037	No				MCPH1	0.037
MAP7D3		1	1	27	0.037	No				MAP7D3	0.037
ZDHHC14		1	1	27	0.037	No				ZDHHC14	0.037
WDR59		1	1	27	0.037	No				WDR59	0.037
PALB2		1	1	27	0.037	Yes				PALB2	0.037
E2F8		1	1	27	0.037	No				E2F8	0.037
ZNF750		1	1	27	0.037	No				ZNF750	0.037
KATNBL1		1	1	27	0.037	No				KATNBL1	0.037
MCTP1		1	1	27	0.037	No				MCTP1	0.037
LRRC31		1	1	27	0.037	No				LRRC31	0.037
SUGCT		1	1	27	0.037	No				SUGCT	0.037
CLMN		1	1	27	0.037	No				CLMN	0.037
UGT2A3		1	1	27	0.037	No				UGT2A3	0.037
HHIPL2		1	1	27	0.037	No				HHIPL2	0.037
CATSPERB		1	1	27	0.037	No				CATSPERB	0.037
ARHGAP28		1	1	27	0.037	No				ARHGAP28	0.037
QSER1		1	1	27	0.037	No				QSER1	0.037
CSPP1		1	1	27	0.037	No				CSPP1	0.037
RBFA		1	1	27	0.037	No				RBFA	0.037
BORA		1	1	27	0.037	No				BORA	0.037
TCTN2		1	1	27	0.037	No				TCTN2	0.037
RPAP2		1	1	27	0.037	No				RPAP2	0.037
PODNL1		1	1	27	0.037	No				PODNL1	0.037
GGNBP2		1	1	27	0.037	No				GGNBP2	0.037
THNSL1		1	1	27	0.037	No				THNSL1	0.037
NAA60		1	1	27	0.037	No				NAA60	0.037
SPEF2		1	1	27	0.037	No				SPEF2	0.037
SYNPO2L		1	1	27	0.037	No				SYNPO2L	0.037
CNTD2		1	1	27	0.037	No				CNTD2	0.037
DENND1C		1	1	27	0.037	No				DENND1C	0.037
WDR76		1	1	27	0.037	No				WDR76	0.037
SVEP1		1	1	27	0.037	No				SVEP1	0.037
ELOVL7		1	1	27	0.037	No				ELOVL7	0.037
ANKRD53		1	1	27	0.037	No				ANKRD53	0.037
PCNX2		1	1	27	0.037	No				PCNX2	0.037
ESRP2		1	1	27	0.037	No				ESRP2	0.037
PHC3		1	1	27	0.037	No				PHC3	0.037
MINDY3		1	1	27	0.037	No				MINDY3	0.037
CSRNP3		1	1	27	0.037	No				CSRNP3	0.037
TRPM3		1	1	27	0.037	No				TRPM3	0.037
GPR157		1	1	27	0.037	No				GPR157	0.037
ATF7IP2		1	1	27	0.037	No				ATF7IP2	0.037
ADAMTS20		1	1	27	0.037	No				ADAMTS20	0.037
ASRGL1		1	1	27	0.037	No				ASRGL1	0.037
TEDC2		1	1	27	0.037	No				TEDC2	0.037
RUBCNL		1	1	27	0.037	No				RUBCNL	0.037
HKDC1		1	1	27	0.037	No				HKDC1	0.037
FHOD3		1	1	27	0.037	No				FHOD3	0.037
ALPK1		1	1	27	0.037	No				ALPK1	0.037
CFAP43		1	1	27	0.037	No				CFAP43	0.037
CXORF21		1	1	27	0.037	No				CXORF21	0.037
KLHL15		1	1	27	0.037	No				KLHL15	0.037
EPC1		1	1	27	0.037	No				EPC1	0.037
TNKS2		1	1	27	0.037	No				TNKS2	0.037
TSGA10		1	1	27	0.037	No				TSGA10	0.037
AKNA		1	1	27	0.037	No				AKNA	0.037
TSEN2		1	1	27	0.037	No				TSEN2	0.037
ITIH5		1	1	27	0.037	No				ITIH5	0.037
INTS5		1	1	27	0.037	No				INTS5	0.037
ASXL3		1	1	27	0.037	No				ASXL3	0.037
OR11H1		1	1	27	0.037	No				OR11H1	0.037
OR51E2		1	1	27	0.037	No				OR51E2	0.037
OR4A16		1	1	27	0.037	No				OR4A16	0.037
OR4A15		1	1	27	0.037	No				OR4A15	0.037
FAM49A		1	1	27	0.037	No				FAM49A	0.037
YIPF5		1	1	27	0.037	No				YIPF5	0.037
ACTL8		1	1	27	0.037	No				ACTL8	0.037
DIAPH3		1	1	27	0.037	No				DIAPH3	0.037
TRIM7		1	1	27	0.037	No				TRIM7	0.037
NUAK2		2	1	27	0.037	No				NUAK2	0.037
ADAMTS12		1	1	27	0.037	No				ADAMTS12	0.037
SLCO5A1		1	1	27	0.037	No				SLCO5A1	0.037
NETO2		1	1	27	0.037	No				NETO2	0.037
MED25		1	1	27	0.037	No				MED25	0.037
GLT8D2		1	1	27	0.037	No				GLT8D2	0.037
COG3		1	1	27	0.037	No				COG3	0.037
SOX7		1	1	27	0.037	No				SOX7	0.037
ZMIZ2		1	1	27	0.037	No				ZMIZ2	0.037
SLC4A9		1	1	27	0.037	No				SLC4A9	0.037
ITCH		1	1	27	0.037	No				ITCH	0.037
TFAP2D		1	1	27	0.037	No				TFAP2D	0.037
USP26		1	1	27	0.037	No				USP26	0.037
SNX25		1	1	27	0.037	No				SNX25	0.037
STARD3NL		1	1	27	0.037	No				STARD3NL	0.037
SPNS1		1	1	27	0.037	No				SPNS1	0.037
CCDC8		1	1	27	0.037	No				CCDC8	0.037
CTTNBP2		1	1	27	0.037	No				CTTNBP2	0.037
OBSCN		1	1	27	0.037	No				OBSCN	0.037
EMILIN2		1	1	27	0.037	No				EMILIN2	0.037
ARMC2		1	1	27	0.037	No				ARMC2	0.037
C3ORF20		1	1	27	0.037	No				C3ORF20	0.037
LRRIQ1		3	1	27	0.037	No				LRRIQ1	0.037
ZNRF3		1	1	27	0.037	Yes				ZNRF3	0.037
SYDE2		1	1	27	0.037	No				SYDE2	0.037
PPP1R1B		3	1	27	0.037	No				PPP1R1B	0.037
ARID5B		1	1	27	0.037	Yes				ARID5B	0.037
FAR1		1	1	27	0.037	No				FAR1	0.037
CIAO2A		1	1	27	0.037	No				CIAO2A	0.037
TMEM117		1	1	27	0.037	No				TMEM117	0.037
NBPF3		1	1	27	0.037	No				NBPF3	0.037
SGIP1		1	1	27	0.037	No				SGIP1	0.037
TMEM175		1	1	27	0.037	No				TMEM175	0.037
ING5		1	1	27	0.037	No				ING5	0.037
CCDC77		1	1	27	0.037	No				CCDC77	0.037
HPS3		1	1	27	0.037	No				HPS3	0.037
SYVN1		1	1	27	0.037	No				SYVN1	0.037
ZC3H8		1	1	27	0.037	No				ZC3H8	0.037
ZNF559		1	1	27	0.037	No				ZNF559	0.037
ACSS1		1	1	27	0.037	No				ACSS1	0.037
KIAA1841		1	1	27	0.037	No				KIAA1841	0.037
IL1F10		1	1	27	0.037	No				IL1F10	0.037
ADGRE3		1	1	27	0.037	No				ADGRE3	0.037
CARD6		1	1	27	0.037	No				CARD6	0.037
TRIM55		1	1	27	0.037	No				TRIM55	0.037
GTPBP3		1	1	27	0.037	No				GTPBP3	0.037
GPT2		1	1	27	0.037	No				GPT2	0.037
FAM167B		1	1	27	0.037	No				FAM167B	0.037
PCGF1		1	1	27	0.037	No				PCGF1	0.037
TRIM51		1	1	27	0.037	No				TRIM51	0.037
MPV17L2		1	1	27	0.037	No				MPV17L2	0.037
KMT5C		1	1	27	0.037	No				KMT5C	0.037
MFSD9		1	1	27	0.037	No				MFSD9	0.037
LMNB2		1	1	27	0.037	No				LMNB2	0.037
RIOX2		1	1	27	0.037	No				RIOX2	0.037
ZNF514		1	1	27	0.037	No				ZNF514	0.037
FBH1		1	1	27	0.037	No				FBH1	0.037
LINGO1		1	1	27	0.037	No				LINGO1	0.037
TMTC4		1	1	27	0.037	No				TMTC4	0.037
ATOH8		1	1	27	0.037	No				ATOH8	0.037
ZNF566		1	1	27	0.037	No				ZNF566	0.037
SERAC1		1	1	27	0.037	No				SERAC1	0.037
CEP19		1	1	27	0.037	No				CEP19	0.037
ARHGAP19		1	1	27	0.037	No				ARHGAP19	0.037
REPS1		1	1	27	0.037	No				REPS1	0.037
FBF1		1	1	27	0.037	No				FBF1	0.037
MYLK2		1	1	27	0.037	No				MYLK2	0.037
KIAA1755		1	1	27	0.037	No				KIAA1755	0.037
UNK		1	1	27	0.037	No				UNK	0.037
FHDC1		1	1	27	0.037	No				FHDC1	0.037
ZC3H12C		1	1	27	0.037	No				ZC3H12C	0.037
DNAJC5B		1	1	27	0.037	No				DNAJC5B	0.037
LMLN		1	1	27	0.037	No				LMLN	0.037
SIGLEC10		1	1	27	0.037	No				SIGLEC10	0.037
NAV3		1	1	27	0.037	No				NAV3	0.037
KLHL6		1	1	27	0.037	Yes				KLHL6	0.037
UBE3B		1	1	27	0.037	No				UBE3B	0.037
RHOT2		1	1	27	0.037	No				RHOT2	0.037
KLC4		1	1	27	0.037	No				KLC4	0.037
ZNF30		1	1	27	0.037	No				ZNF30	0.037
KCNH7		1	1	27	0.037	No				KCNH7	0.037
FRMD7		1	1	27	0.037	No				FRMD7	0.037
SNX21		1	1	27	0.037	No				SNX21	0.037
EXOC3L2		1	1	27	0.037	No				EXOC3L2	0.037
ZNF479		1	1	27	0.037	No				ZNF479	0.037
IL33		1	1	27	0.037	No				IL33	0.037
ANKRD30A		1	1	27	0.037	No				ANKRD30A	0.037
FAAP24		1	1	27	0.037	No				FAAP24	0.037
RNF185		1	1	27	0.037	No				RNF185	0.037
PLXNA4		1	1	27	0.037	No				PLXNA4	0.037
DEPDC7		1	1	27	0.037	No				DEPDC7	0.037
NEXN		1	1	27	0.037	No				NEXN	0.037
NLRP12		2	1	27	0.037	No				NLRP12	0.037
ACY3		1	1	27	0.037	No				ACY3	0.037
NXPE3		1	1	27	0.037	No				NXPE3	0.037
WDR20		1	1	27	0.037	No				WDR20	0.037
MARVELD3		1	1	27	0.037	No				MARVELD3	0.037
MTSS2		1	1	27	0.037	No				MTSS2	0.037
GORAB		1	1	27	0.037	No				GORAB	0.037
PXYLP1		1	1	27	0.037	No				PXYLP1	0.037
RBM18		1	1	27	0.037	No				RBM18	0.037
BICDL1		1	1	27	0.037	No				BICDL1	0.037
ZNF764		1	1	27	0.037	No				ZNF764	0.037
FAM114A1		1	1	27	0.037	No				FAM114A1	0.037
DNER		1	1	27	0.037	No				DNER	0.037
NT5C1B		1	1	27	0.037	No				NT5C1B	0.037
PKHD1L1		1	1	27	0.037	No				PKHD1L1	0.037
PIGM		1	1	27	0.037	No				PIGM	0.037
TRMT10A		1	1	27	0.037	No				TRMT10A	0.037
TBC1D31		1	1	27	0.037	No				TBC1D31	0.037
TBCK		2	1	27	0.037	No				TBCK	0.037
TTYH2		1	1	27	0.037	No				TTYH2	0.037
FTMT		1	1	27	0.037	No				FTMT	0.037
SYAP1		1	1	27	0.037	No				SYAP1	0.037
PPP1R14A		1	1	27	0.037	No				PPP1R14A	0.037
CASC4		1	1	27	0.037	No				CASC4	0.037
HELQ		1	1	27	0.037	No				HELQ	0.037
KLHDC7B		1	1	27	0.037	No				KLHDC7B	0.037
HENMT1		1	1	27	0.037	No				HENMT1	0.037
NLRP3		1	1	27	0.037	No				NLRP3	0.037
TMEM132B		1	1	27	0.037	No				TMEM132B	0.037
SORCS1		1	1	27	0.037	No				SORCS1	0.037
OSBPL1A		1	1	27	0.037	No				OSBPL1A	0.037
CCDC124		1	1	27	0.037	No				CCDC124	0.037
DDIT4L		1	1	27	0.037	No				DDIT4L	0.037
PCMTD1		1	1	27	0.037	No				PCMTD1	0.037
GPR146		1	1	27	0.037	No				GPR146	0.037
LRRC58		1	1	27	0.037	No				LRRC58	0.037
C8ORF34		1	1	27	0.037	No				C8ORF34	0.037
MED12L		1	1	27	0.037	No				MED12L	0.037
ARAP2		1	1	27	0.037	No				ARAP2	0.037
CATSPER1		1	1	27	0.037	No				CATSPER1	0.037
SH2D1B		1	1	27	0.037	No				SH2D1B	0.037
RAB3IP		1	1	27	0.037	No				RAB3IP	0.037
IP6K3		1	1	27	0.037	No				IP6K3	0.037
C10ORF71		1	1	27	0.037	No				C10ORF71	0.037
PIK3AP1		1	1	27	0.037	No				PIK3AP1	0.037
FRA10AC1		1	1	27	0.037	No				FRA10AC1	0.037
PDZD8		1	1	27	0.037	No				PDZD8	0.037
OR52E2		2	1	27	0.037	No				OR52E2	0.037
OR52R1		1	1	27	0.037	No				OR52R1	0.037
OR4B1		1	1	27	0.037	No				OR4B1	0.037
OR5P2		1	1	27	0.037	No				OR5P2	0.037
CYP2R1		1	1	27	0.037	No				CYP2R1	0.037
PIH1D2		1	1	27	0.037	No				PIH1D2	0.037
NXPE1		1	1	27	0.037	No				NXPE1	0.037
TMEM132D		1	1	27	0.037	No				TMEM132D	0.037
ANO4		1	1	27	0.037	No				ANO4	0.037
TEX29		1	1	27	0.037	No				TEX29	0.037
AK7		1	1	27	0.037	No				AK7	0.037
OR4K14		1	1	27	0.037	No				OR4K14	0.037
AGBL1		1	1	27	0.037	No				AGBL1	0.037
ACSM2A		2	1	27	0.037	No				ACSM2A	0.037
ANKS3		1	1	27	0.037	No				ANKS3	0.037
HEXIM2		1	1	27	0.037	No				HEXIM2	0.037
TMEM132E		1	1	27	0.037	No				TMEM132E	0.037
WDR81		1	1	27	0.037	No				WDR81	0.037
OR7G1		1	1	27	0.037	No				OR7G1	0.037
ACER1		1	1	27	0.037	No				ACER1	0.037
ZNF573		1	1	27	0.037	No				ZNF573	0.037
JSRP1		1	1	27	0.037	No				JSRP1	0.037
WDR63		1	1	27	0.037	No				WDR63	0.037
AXDND1		1	1	27	0.037	No				AXDND1	0.037
OR2M5		1	1	27	0.037	No				OR2M5	0.037
OR2T4		1	1	27	0.037	No				OR2T4	0.037
ATP6V1G3		1	1	27	0.037	No				ATP6V1G3	0.037
ERICH3		1	1	27	0.037	No				ERICH3	0.037
OR2B11		1	1	27	0.037	No				OR2B11	0.037
IQGAP3		2	1	27	0.037	No				IQGAP3	0.037
ARHGEF19		1	1	27	0.037	No				ARHGEF19	0.037
OR10T2		1	1	27	0.037	No				OR10T2	0.037
OR6N1		1	1	27	0.037	No				OR6N1	0.037
PROKR2		1	1	27	0.037	No				PROKR2	0.037
SLX4IP		1	1	27	0.037	No				SLX4IP	0.037
GAB4		1	1	27	0.037	No				GAB4	0.037
ZNF280A		1	1	27	0.037	No				ZNF280A	0.037
NMS		1	1	27	0.037	No				NMS	0.037
RFTN2		1	1	27	0.037	No				RFTN2	0.037
PLEKHH2		1	1	27	0.037	No				PLEKHH2	0.037
ZNF513		1	1	27	0.037	No				ZNF513	0.037
ERICH6		1	1	27	0.037	No				ERICH6	0.037
COL6A6		1	1	27	0.037	No				COL6A6	0.037
GRK7		1	1	27	0.037	No				GRK7	0.037
EVC2		1	1	27	0.037	No				EVC2	0.037
SLCO6A1		1	1	27	0.037	No				SLCO6A1	0.037
PPARGC1B		1	1	27	0.037	No				PPARGC1B	0.037
EGFLAM		1	1	27	0.037	No				EGFLAM	0.037
NADK2		1	1	27	0.037	No				NADK2	0.037
DNAJC21		1	1	27	0.037	No				DNAJC21	0.037
RIPPLY2		1	1	27	0.037	No				RIPPLY2	0.037
CD109		1	1	27	0.037	No				CD109	0.037
ZNF786		1	1	27	0.037	No				ZNF786	0.037
COL26A1		1	1	27	0.037	No				COL26A1	0.037
SVOPL		1	1	27	0.037	No				SVOPL	0.037
GOT1L1		1	1	27	0.037	No				GOT1L1	0.037
PXDNL		1	1	27	0.037	No				PXDNL	0.037
DCAF4L2		1	1	27	0.037	No				DCAF4L2	0.037
OR13C3		1	1	27	0.037	No				OR13C3	0.037
OR13F1		1	1	27	0.037	No				OR13F1	0.037
SLITRK4		1	1	27	0.037	No				SLITRK4	0.037
DCAF12L1		1	1	27	0.037	No				DCAF12L1	0.037
AMER1		1	1	27	0.037	Yes				AMER1	0.037
ADGRG4		1	1	27	0.037	No				ADGRG4	0.037
ACTRT1		1	1	27	0.037	No				ACTRT1	0.037
DOCK11		1	1	27	0.037	No				DOCK11	0.037
MUC17		1	1	27	0.037	No				MUC17	0.037
ZFP28		1	1	27	0.037	No				ZFP28	0.037
BPIFA2		1	1	27	0.037	No				BPIFA2	0.037
MACROD2		1	1	27	0.037	No				MACROD2	0.037
SLC34A3		1	1	27	0.037	No				SLC34A3	0.037
PIWIL4		1	1	27	0.037	No				PIWIL4	0.037
KBTBD3		1	1	27	0.037	No				KBTBD3	0.037
PLEKHA7		1	1	27	0.037	No				PLEKHA7	0.037
WDR66		1	1	27	0.037	No				WDR66	0.037
CFAP54		1	1	27	0.037	No				CFAP54	0.037
A2ML1		1	1	27	0.037	No				A2ML1	0.037
ZSCAN29		1	1	27	0.037	No				ZSCAN29	0.037
PRR35		1	1	27	0.037	No				PRR35	0.037
ZNF597		1	1	27	0.037	No				ZNF597	0.037
C16ORF89		1	1	27	0.037	No				C16ORF89	0.037
CFAP52		1	1	27	0.037	No				CFAP52	0.037
SLC35G3		1	1	27	0.037	No				SLC35G3	0.037
KIF18B		1	1	27	0.037	No				KIF18B	0.037
KCTD11		1	1	27	0.037	No				KCTD11	0.037
KRT25		1	1	27	0.037	No				KRT25	0.037
CCBE1		1	1	27	0.037	No				CCBE1	0.037
LYPD4		1	1	27	0.037	No				LYPD4	0.037
ZNF599		1	1	27	0.037	No				ZNF599	0.037
SLC35F3		1	1	27	0.037	No				SLC35F3	0.037
ANKRD35		1	1	27	0.037	No				ANKRD35	0.037
LRRC71		1	1	27	0.037	No				LRRC71	0.037
ADIG		1	1	27	0.037	No				ADIG	0.037
BPIFB4		1	1	27	0.037	No				BPIFB4	0.037
ANKAR		1	1	27	0.037	No				ANKAR	0.037
GPAT2		1	1	27	0.037	No				GPAT2	0.037
ITPRIPL1		1	1	27	0.037	No				ITPRIPL1	0.037
ARL6IP6		1	1	27	0.037	No				ARL6IP6	0.037
SGO2		1	1	27	0.037	No				SGO2	0.037
WDSUB1		1	1	27	0.037	No				WDSUB1	0.037
CCDC12		1	1	27	0.037	No				CCDC12	0.037
RNF38		1	1	27	0.037	No				RNF38	0.037
NFXL1		1	1	27	0.037	No				NFXL1	0.037
MBLAC2		1	1	27	0.037	No				MBLAC2	0.037
KCTD7		1	1	27	0.037	No				KCTD7	0.037
AGR3		1	1	27	0.037	No				AGR3	0.037
TMEM74		1	1	27	0.037	No				TMEM74	0.037
MAMDC4		1	1	27	0.037	No				MAMDC4	0.037
SAXO1		1	1	27	0.037	No				SAXO1	0.037
ZNF483		1	1	27	0.037	No				ZNF483	0.037
SHOC1		1	1	27	0.037	No				SHOC1	0.037
CSAG1		1	1	27	0.037	No				CSAG1	0.037
USP51		1	1	27	0.037	No				USP51	0.037
CFAP58		1	1	27	0.037	No				CFAP58	0.037
LMNTD1		1	1	27	0.037	No				LMNTD1	0.037
CCDC63		1	1	27	0.037	No				CCDC63	0.037
MDGA2		1	1	27	0.037	No				MDGA2	0.037
ANKFN1		1	1	27	0.037	No				ANKFN1	0.037
2020-03-10		1	1	27	0.037	No				2020-03-10	0.037
MFSD6L		1	1	27	0.037	No				MFSD6L	0.037
ZNF836		1	1	27	0.037	No				ZNF836	0.037
ZNF610		1	1	27	0.037	No				ZNF610	0.037
ZNF320		1	1	27	0.037	No				ZNF320	0.037
UBXN2A		1	1	27	0.037	No				UBXN2A	0.037
DNAJB8		1	1	27	0.037	No				DNAJB8	0.037
PRICKLE2		1	1	27	0.037	No				PRICKLE2	0.037
TRIM60		1	1	27	0.037	No				TRIM60	0.037
TIGD2		1	1	27	0.037	No				TIGD2	0.037
PRSS35		1	1	27	0.037	No				PRSS35	0.037
PKD1L1		1	1	27	0.037	No				PKD1L1	0.037
GIMAP7		1	1	27	0.037	No				GIMAP7	0.037
COL22A1		1	1	27	0.037	No				COL22A1	0.037
ZNF596		1	1	27	0.037	No				ZNF596	0.037
KCNG3		1	1	27	0.037	No				KCNG3	0.037
KRT24		1	1	27	0.037	No				KRT24	0.037
OR56B4		1	1	27	0.037	No				OR56B4	0.037
KRT78		1	1	27	0.037	No				KRT78	0.037
DTX3		1	1	27	0.037	No				DTX3	0.037
ZFC3H1		1	1	27	0.037	No				ZFC3H1	0.037
NSMCE1		1	1	27	0.037	No				NSMCE1	0.037
ZNF48		1	1	27	0.037	No				ZNF48	0.037
NBPF11		1	1	27	0.037	No				NBPF11	0.037
FAM209A		1	1	27	0.037	No				FAM209A	0.037
TET3		1	1	27	0.037	Yes				TET3	0.037
KLHDC8B		1	1	27	0.037	No				KLHDC8B	0.037
FLCN		1	1	27	0.037	Yes				FLCN	0.037
PDE12		1	1	27	0.037	No				PDE12	0.037
CCDC125		1	1	27	0.037	No				CCDC125	0.037
ADAM32		1	1	27	0.037	No				ADAM32	0.037
ERICH5		1	1	27	0.037	No				ERICH5	0.037
CCDC171		1	1	27	0.037	No				CCDC171	0.037
INTS6L		1	1	27	0.037	No				INTS6L	0.037
ANO5		1	1	27	0.037	No				ANO5	0.037
PDILT		1	1	27	0.037	No				PDILT	0.037
AMER3		1	1	27	0.037	No				AMER3	0.037
USP12		1	1	27	0.037	No				USP12	0.037
OR4C6		1	1	27	0.037	No				OR4C6	0.037
OR8K3		1	1	27	0.037	No				OR8K3	0.037
OR5M11		1	1	27	0.037	No				OR5M11	0.037
TEX47		1	1	27	0.037	No				TEX47	0.037
OR8B12		1	1	27	0.037	No				OR8B12	0.037
OR6T1		1	1	27	0.037	No				OR6T1	0.037
OR4D5		1	1	27	0.037	No				OR4D5	0.037
TPCN2		1	1	27	0.037	No				TPCN2	0.037
OR1S1		1	1	27	0.037	No				OR1S1	0.037
OR10Q1		1	1	27	0.037	No				OR10Q1	0.037
GLYATL2		1	1	27	0.037	No				GLYATL2	0.037
HEPACAM		1	1	27	0.037	No				HEPACAM	0.037
RNF152		1	1	27	0.037	No				RNF152	0.037
ZNF485		1	1	27	0.037	No				ZNF485	0.037
SLC39A12		1	1	27	0.037	No				SLC39A12	0.037
NSUN6		1	1	27	0.037	No				NSUN6	0.037
ADGRG5		1	1	27	0.037	No				ADGRG5	0.037
CES5A		1	1	27	0.037	No				CES5A	0.037
TBC1D32		1	1	27	0.037	No				TBC1D32	0.037
ADGRF4		1	1	27	0.037	No				ADGRF4	0.037
ADGRF5		1	1	27	0.037	No				ADGRF5	0.037
TDRD6		1	1	27	0.037	No				TDRD6	0.037
ZBTB9		1	1	27	0.037	No				ZBTB9	0.037
SYCP2L		1	1	27	0.037	No				SYCP2L	0.037
SDK1		1	1	27	0.037	No				SDK1	0.037
FOXK1		1	1	27	0.037	No				FOXK1	0.037
THSD7A		1	1	27	0.037	No				THSD7A	0.037
LRWD1		1	1	27	0.037	No				LRWD1	0.037
FBXL13		1	1	27	0.037	No				FBXL13	0.037
CDHR3		1	1	27	0.037	No				CDHR3	0.037
SLC35F1		1	1	27	0.037	No				SLC35F1	0.037
SEMA3D		1	1	27	0.037	No				SEMA3D	0.037
MAPK15		1	1	27	0.037	No				MAPK15	0.037
DEFB110		2	1	27	0.037	No				DEFB110	0.037
RICTOR		1	1	27	0.037	Yes				RICTOR	0.037
ZBTB38		1	1	27	0.037	No				ZBTB38	0.037
CADM2		1	1	27	0.037	No				CADM2	0.037
MSRB3		1	1	27	0.037	No				MSRB3	0.037
ZDHHC20		1	1	27	0.037	No				ZDHHC20	0.037
RALGAPA1		1	1	27	0.037	No				RALGAPA1	0.037
ETFBKMT		1	1	27	0.037	No				ETFBKMT	0.037
UBN2		1	1	27	0.037	No				UBN2	0.037
EHBP1L1		1	1	27	0.037	No				EHBP1L1	0.037
OR6C3		1	1	27	0.037	No				OR6C3	0.037
TAC4		1	1	27	0.037	No				TAC4	0.037
OR52B2		1	1	27	0.037	No				OR52B2	0.037
[truncated: 158 more rows]

## Sheet: ERBB2 mutations
Study	Sample ID	Cancer Type	Protein Change	Annotation	Functional Impact	Mutation Type	Variant Type	Copy #	COSMIC	MS	VS	Center	Chromosome	Start Pos	End Pos	Ref	Var	HGVSg	HGVSc	Allele Freq (T)	Allele Freq (N)	Variant Reads	Ref Reads	Variant Reads (Normal)	Ref Reads (Normal)	# Mut in Sample	Exon	gnomAD	ClinVar ID	dbSNP
Uterine Corpus Endometrial Carcinoma (TCGA, PanCancer Atlas)	TCGA-AX-A064-01	Uterine Endometrioid Carcinoma	A1232Lfs*70	OncoKB: Likely Oncogenic, level_3b;CIViC: NA;MyCancerGenome: not present;CancerHotspot: no;3DHotspot: no	MutationAssessor: NA;SIFT: NA;Polyphen-2: NA	Frame_Shift_Del	DEL	diploid		.	.	.	17	37884218	37884218	G	-	17:g.37884218del	ENST00000269571.5:c.3694del	0.25		9	27		27	262	27/27
Breast Invasive Carcinoma (TCGA, PanCancer Atlas)	TCGA-D8-A27V-01	Breast Invasive Lobular Carcinoma	G621Afs*31	OncoKB: Unknown, level NA;CIViC: NA;MyCancerGenome: not present;CancerHotspot: no;3DHotspot: no	MutationAssessor: NA;SIFT: NA;Polyphen-2: NA	Frame_Shift_Del	DEL	shallowdel		.	.	.	17	37873695	37873695	G	-	17:g.37873695del	ENST00000269571.5:c.1862del	0.14		7	44		21	3081	15/27
Breast Invasive Carcinoma (TCGA, PanCancer Atlas)	TCGA-EW-A2FV-01	Breast Invasive Carcinoma (NOS)	A355Qfs*76	OncoKB: Unknown, level NA;CIViC: NA;MyCancerGenome: not present;CancerHotspot: no;3DHotspot: no	MutationAssessor: NA;SIFT: NA;Polyphen-2: NA	Frame_Shift_Del	DEL	shallowdel		.	.	.	17	37868614	37868614	G	-	17:g.37868614del	ENST00000269571.5:c.1063del	0.1		9	85		94	3877	2020-09-27
Breast Invasive Carcinoma (TCGA, PanCancer Atlas)	TCGA-EW-A2FV-01	Breast Invasive Carcinoma (NOS)	W482Gfs*74	OncoKB: Unknown, level NA;CIViC: NA;MyCancerGenome: not present;CancerHotspot: no;3DHotspot: no	MutationAssessor: NA;SIFT: NA;Polyphen-2: NA	Frame_Shift_Del	DEL	shallowdel		.	.	.	17	37872120	37872120	C	-	17:g.37872120del	ENST00000269571.5:c.1443del	0.09		4	41		63	3877	2020-12-27
Cervical Squamous Cell Carcinoma (TCGA, PanCancer Atlas)	TCGA-EK-A2RM-01	Cervical Squamous Cell Carcinoma	P1033Qfs*27	OncoKB: Unknown, level NA;CIViC: NA;MyCancerGenome: not present;CancerHotspot: no;3DHotspot: no	MutationAssessor: NA;SIFT: NA;Polyphen-2: NA	Frame_Shift_Del	DEL	amp		.	.	.	17	37883194	37883194	C	-	17:g.37883194del	ENST00000269571.5:c.3098del	0.1		75	669		23	81	25/27
Acute Myeloid Leukemia (TCGA, PanCancer Atlas)	TCGA-AB-2826-03	Acute Myeloid Leukemia	S1107Afs*25	OncoKB: Unknown, level NA;CIViC: NA;MyCancerGenome: not present;CancerHotspot: no;3DHotspot: no	MutationAssessor: NA;SIFT: NA;Polyphen-2: NA	Frame_Shift_Del	DEL	diploid		.	.	.	17	37883703	37883703	C	-	17:g.37883703del	ENST00000269571.5:c.3318del	0.22		6	21		35	635	26/27
Kidney Renal Clear Cell Carcinoma (TCGA, PanCancer Atlas)	TCGA-CZ-4859-01	Renal Clear Cell Carcinoma	N388Qfs*14	OncoKB: Unknown, level NA;CIViC: NA;MyCancerGenome: not present;CancerHotspot: no;3DHotspot: no	MutationAssessor: NA;SIFT: NA;Polyphen-2: NA	Frame_Shift_Ins	INS	diploid		.	.	.	17	37871549	37871550	-	C	17:g.37871549_37871550insC	ENST00000269571.5:c.1161dup	0.29		12	29		45	100	2020-10-27
Bladder Urothelial Carcinoma (TCGA, PanCancer Atlas)	TCGA-4Z-AA7S-01	Bladder Urothelial Carcinoma	ERBB2-CTTN	OncoKB: Unknown, level NA;CIViC: NA;MyCancerGenome: not present;CancerHotspot: no;3DHotspot: no	MutationAssessor: NA;SIFT: NA;Polyphen-2: NA	Fusion	NA	amp		NA	NA	WashU	NA	-1	-1	NA										58
Bladder Urothelial Carcinoma (TCGA, PanCancer Atlas)	TCGA-CU-A3KJ-01	Bladder Urothelial Carcinoma	ERBB2-CTTN	OncoKB: Unknown, level NA;CIViC: NA;MyCancerGenome: not present;CancerHotspot: no;3DHotspot: no	MutationAssessor: NA;SIFT: NA;Polyphen-2: NA	Fusion	NA	diploid		NA	NA	WashU	NA	-1	-1	NA										202
Bladder Urothelial Carcinoma (TCGA, PanCancer Atlas)	TCGA-DK-A1A5-01	Bladder Urothelial Carcinoma	ERBB2-CTTN	OncoKB: Unknown, level NA;CIViC: NA;MyCancerGenome: not present;CancerHotspot: no;3DHotspot: no	MutationAssessor: NA;SIFT: NA;Polyphen-2: NA	Fusion	NA	amp		NA	NA	WashU	NA	-1	-1	NA										235
Cervical Squamous Cell Carcinoma (TCGA, PanCancer Atlas)	TCGA-DS-A7WF-01	Cervical Squamous Cell Carcinoma	ERBB2-CTTN	OncoKB: Unknown, level NA;CIViC: NA;MyCancerGenome: not present;CancerHotspot: no;3DHotspot: no	MutationAssessor: NA;SIFT: NA;Polyphen-2: NA	Fusion	NA	amp		NA	NA	WashU	NA	-1	-1	NA										42
Head and Neck Squamous Cell Carcinoma (TCGA, PanCancer Atlas)	TCGA-CV-5431-01	Head and Neck Squamous Cell Carcinoma	ERBB2-CTTN	OncoKB: Unknown, level NA;CIViC: NA;MyCancerGenome: not present;CancerHotspot: no;3DHotspot: no	MutationAssessor: NA;SIFT: NA;Polyphen-2: NA	Fusion	NA	amp		NA	NA	WashU	NA	-1	-1	NA
Lung Squamous Cell Carcinoma (TCGA, PanCancer Atlas)	TCGA-58-8391-01	Lung Squamous Cell Carcinoma	ERBB2-CTTN	OncoKB: Unknown, level NA;CIViC: NA;MyCancerGenome: not present;CancerHotspot: no;3DHotspot: no	MutationAssessor: NA;SIFT: NA;Polyphen-2: NA	Fusion	NA	amp		NA	NA	WashU	NA	-1	-1	NA										307
Lung Squamous Cell Carcinoma (TCGA, PanCancer Atlas)	TCGA-94-A4VJ-01	Lung Squamous Cell Carcinoma	ERBB2-CTTN	OncoKB: Unknown, level NA;CIViC: NA;MyCancerGenome: not present;CancerHotspot: no;3DHotspot: no	MutationAssessor: NA;SIFT: NA;Polyphen-2: NA	Fusion	NA	amp		NA	NA	WashU	NA	-1	-1	NA										370
Pancreatic Adenocarcinoma (TCGA, PanCancer Atlas)	TCGA-3A-A9J0-01	Pancreatic Adenocarcinoma	ERBB2-CTTN	OncoKB: Unknown, level NA;CIViC: NA;MyCancerGenome: not present;CancerHotspot: no;3DHotspot: no	MutationAssessor: NA;SIFT: NA;Polyphen-2: NA	Fusion	NA	amp		NA	NA	WashU	NA	-1	-1	NA										77
Bladder Urothelial Carcinoma (TCGA, PanCancer Atlas)	TCGA-DK-A1A3-01	Bladder Urothelial Carcinoma	ERBB2-PPP1R1B	OncoKB: Unknown, level NA;CIViC: NA;MyCancerGenome: not present;CancerHotspot: no;3DHotspot: no	MutationAssessor: NA;SIFT: NA;Polyphen-2: NA	Fusion	NA	diploid		NA	NA	WashU	NA	-1	-1	NA										566
Breast Invasive Carcinoma (TCGA, PanCancer Atlas)	TCGA-C8-A12Z-01	Breast Invasive Ductal Carcinoma	ERBB2-PPP1R1B	OncoKB: Unknown, level NA;CIViC: NA;MyCancerGenome: not present;CancerHotspot: no;3DHotspot: no	MutationAssessor: NA;SIFT: NA;Polyphen-2: NA	Fusion	NA	amp		NA	NA	WashU	NA	-1	-1	NA										43
Breast Invasive Carcinoma (TCGA, PanCancer Atlas)	TCGA-UU-A93S-01	Breast Invasive Ductal Carcinoma	ERBB2-PPP1R1B	OncoKB: Unknown, level NA;CIViC: NA;MyCancerGenome: not present;CancerHotspot: no;3DHotspot: no	MutationAssessor: NA;SIFT: NA;Polyphen-2: NA	Fusion	NA	amp		NA	NA	WashU	NA	-1	-1	NA										139
Cervical Squamous Cell Carcinoma (TCGA, PanCancer Atlas)	TCGA-4J-AA1J-01	Cervical Squamous Cell Carcinoma	ERBB2-PPP1R1B	OncoKB: Unknown, level NA;CIViC: NA;MyCancerGenome: not present;CancerHotspot: no;3DHotspot: no	MutationAssessor: NA;SIFT: NA;Polyphen-2: NA	Fusion	NA	amp		NA	NA	WashU	NA	-1	-1	NA										134
Cervical Squamous Cell Carcinoma (TCGA, PanCancer Atlas)	TCGA-Q1-A73R-01	Endocervical Adenocarcinoma	ERBB2-PPP1R1B	OncoKB: Unknown, level NA;CIViC: NA;MyCancerGenome: not present;CancerHotspot: no;3DHotspot: no	MutationAssessor: NA;SIFT: NA;Polyphen-2: NA	Fusion	NA	amp		NA	NA	WashU	NA	-1	-1	NA										47
Esophageal Adenocarcinoma (TCGA, PanCancer Atlas)	TCGA-2H-A9GF-01	Esophageal Adenocarcinoma	ERBB2-PPP1R1B	OncoKB: Unknown, level NA;CIViC: NA;MyCancerGenome: not present;CancerHotspot: no;3DHotspot: no	MutationAssessor: NA;SIFT: NA;Polyphen-2: NA	Fusion	NA	amp		NA	NA	WashU	NA	-1	-1	NA										251
Liver Hepatocellular Carcinoma (TCGA, PanCancer Atlas)	TCGA-KR-A7K2-01	Hepatocellular Carcinoma	ERBB2-PPP1R1B	OncoKB: Unknown, level NA;CIViC: NA;MyCancerGenome: not present;CancerHotspot: no;3DHotspot: no	MutationAssessor: NA;SIFT: NA;Polyphen-2: NA	Fusion	NA	shallowdel		NA	NA	WashU	NA	-1	-1	NA										44
Lung Squamous Cell Carcinoma (TCGA, PanCancer Atlas)	TCGA-22-0944-01	Lung Squamous Cell Carcinoma	ERBB2-PPP1R1B	OncoKB: Unknown, level NA;CIViC: NA;MyCancerGenome: not present;CancerHotspot: no;3DHotspot: no	MutationAssessor: NA;SIFT: NA;Polyphen-2: NA	Fusion	NA	amp		NA	NA	WashU	NA	-1	-1	NA										107
Ovarian Serous Cystadenocarcinoma (TCGA, PanCancer Atlas)	TCGA-24-2033-01	Serous Ovarian Cancer	ERBB2-PPP1R1B	OncoKB: Unknown, level NA;CIViC: NA;MyCancerGenome: not present;CancerHotspot: no;3DHotspot: no	MutationAssessor: NA;SIFT: NA;Polyphen-2: NA	Fusion	NA	shallowdel		NA	NA	WashU	NA	-1	-1	NA										104
Pancreatic Adenocarcinoma (TCGA, PanCancer Atlas)	TCGA-LB-A7SX-01	Pancreatic Adenocarcinoma	ERBB2-PPP1R1B	OncoKB: Unknown, level NA;CIViC: NA;MyCancerGenome: not present;CancerHotspot: no;3DHotspot: no	MutationAssessor: NA;SIFT: NA;Polyphen-2: NA	Fusion	NA	gain		NA	NA	WashU	NA	-1	-1	NA										83
Breast Invasive Carcinoma (TCGA, PanCancer Atlas)	TCGA-A2-A1G1-01	Breast Invasive Ductal Carcinoma	ERBB2-PSMB3	OncoKB: Unknown, level NA;CIViC: NA;MyCancerGenome: not present;CancerHotspot: no;3DHotspot: no	MutationAssessor: NA;SIFT: NA;Polyphen-2: NA	Fusion	NA	gain		NA	NA	WashU	NA	-1	-1	NA										28
Esophageal Adenocarcinoma (TCGA, PanCancer Atlas)	TCGA-JY-A6FA-01	Esophageal Squamous Cell Carcinoma	ERBB2-PSMB3	OncoKB: Unknown, level NA;CIViC: NA;MyCancerGenome: not present;CancerHotspot: no;3DHotspot: no	MutationAssessor: NA;SIFT: NA;Polyphen-2: NA	Fusion	NA	diploid		NA	NA	WashU	NA	-1	-1	NA										104
Esophageal Adenocarcinoma (TCGA, PanCancer Atlas)	TCGA-L5-A88V-01	Esophageal Adenocarcinoma	ERBB2-PSMB3	OncoKB: Unknown, level NA;CIViC: NA;MyCancerGenome: not present;CancerHotspot: no;3DHotspot: no	MutationAssessor: NA;SIFT: NA;Polyphen-2: NA	Fusion	NA	amp		NA	NA	WashU	NA	-1	-1	NA										151
Cervical Squamous Cell Carcinoma (TCGA, PanCancer Atlas)	TCGA-C5-A2LX-01	Cervical Squamous Cell Carcinoma	ERBB2-IKZF3	OncoKB: Unknown, level NA;CIViC: NA;MyCancerGenome: not present;CancerHotspot: no;3DHotspot: no	MutationAssessor: NA;SIFT: NA;Polyphen-2: NA	Fusion	NA	shallowdel		NA	NA	WashU	NA	-1	-1	NA										176
Esophageal Adenocarcinoma (TCGA, PanCancer Atlas)	TCGA-R6-A8W5-01	Esophageal Adenocarcinoma	ERBB2-IKZF3	OncoKB: Unknown, level NA;CIViC: NA;MyCancerGenome: not present;CancerHotspot: no;3DHotspot: no	MutationAssessor: NA;SIFT: NA;Polyphen-2: NA	Fusion	NA	amp		NA	NA	WashU	NA	-1	-1	NA										92
Head and Neck Squamous Cell Carcinoma (TCGA, PanCancer Atlas)	TCGA-CN-A49C-01	Head and Neck Squamous Cell Carcinoma	ERBB2-IKZF3	OncoKB: Unknown, level NA;CIViC: NA;MyCancerGenome: not present;CancerHotspot: no;3DHotspot: no	MutationAssessor: NA;SIFT: NA;Polyphen-2: NA	Fusion	NA	amp		NA	NA	WashU	NA	-1	-1	NA										47
Ovarian Serous Cystadenocarcinoma (TCGA, PanCancer Atlas)	TCGA-25-1320-01	Serous Ovarian Cancer	ERBB2-IKZF3	OncoKB: Unknown, level NA;CIViC: NA;MyCancerGenome: not present;CancerHotspot: no;3DHotspot: no	MutationAssessor: NA;SIFT: NA;Polyphen-2: NA	Fusion	NA	amp		NA	NA	WashU	NA	-1	-1	NA										114
Stomach Adenocarcinoma (TCGA, PanCancer Atlas)	TCGA-D7-8573-01	Tubular Stomach Adenocarcinoma	ERBB2-IKZF3	OncoKB: Unknown, level NA;CIViC: NA;MyCancerGenome: not present;CancerHotspot: no;3DHotspot: no	MutationAssessor: NA;SIFT: NA;Polyphen-2: NA	Fusion	NA	gain		NA	NA	WashU	NA	-1	-1	NA										73
Uterine Corpus Endometrial Carcinoma (TCGA, PanCancer Atlas)	TCGA-B5-A3S1-01	Uterine Serous Carcinoma/Uterine Papillary Serous Carcinoma	ERBB2-IKZF3	OncoKB: Unknown, level NA;CIViC: NA;MyCancerGenome: not present;CancerHotspot: no;3DHotspot: no	MutationAssessor: NA;SIFT: NA;Polyphen-2: NA	Fusion	NA	amp		NA	NA	WashU	NA	-1	-1	NA										91
Bladder Urothelial Carcinoma (TCGA, PanCancer Atlas)	TCGA-DK-A2I6-01	Bladder Urothelial Carcinoma	ERBB2-TATDN1	OncoKB: Unknown, level NA;CIViC: NA;MyCancerGenome: not present;CancerHotspot: no;3DHotspot: no	MutationAssessor: NA;SIFT: NA;Polyphen-2: NA	Fusion	NA	amp		NA	NA	WashU	NA	-1	-1	NA										248
Bladder Urothelial Carcinoma (TCGA, PanCancer Atlas)	TCGA-DK-A2I6-01	Bladder Urothelial Carcinoma	MTSS1-ERBB2	OncoKB: Unknown, level NA;CIViC: NA;MyCancerGenome: not present;CancerHotspot: no;3DHotspot: no	MutationAssessor: NA;SIFT: NA;Polyphen-2: NA	Fusion	NA	amp		NA	NA	WashU	NA	-1	-1	NA										248
Breast Invasive Carcinoma (TCGA, PanCancer Atlas)	TCGA-AO-A0JM-01	Breast Invasive Ductal Carcinoma	ERBB2-ARL5C	OncoKB: Unknown, level NA;CIViC: NA;MyCancerGenome: not present;CancerHotspot: no;3DHotspot: no	MutationAssessor: NA;SIFT: NA;Polyphen-2: NA	Fusion	NA	gain		NA	NA	WashU	NA	-1	-1	NA										35
Breast Invasive Carcinoma (TCGA, PanCancer Atlas)	TCGA-AR-A254-01	Breast Invasive Ductal Carcinoma	ERBB2-SLC29A3	OncoKB: Unknown, level NA;CIViC: NA;MyCancerGenome: not present;CancerHotspot: no;3DHotspot: no	MutationAssessor: NA;SIFT: NA;Polyphen-2: NA	Fusion	NA	amp		NA	NA	WashU	NA	-1	-1	NA										33
Breast Invasive Carcinoma (TCGA, PanCancer Atlas)	TCGA-BH-A1EV-01	Breast Invasive Ductal Carcinoma	ERBB2-SRCIN1	OncoKB: Unknown, level NA;CIViC: NA;MyCancerGenome: not present;CancerHotspot: no;3DHotspot: no	MutationAssessor: NA;SIFT: NA;Polyphen-2: NA	Fusion	NA	amp		NA	NA	WashU	NA	-1	-1	NA										85
Breast Invasive Carcinoma (TCGA, PanCancer Atlas)	TCGA-C8-A132-01	Breast Invasive Ductal Carcinoma	ERBB2-ABI3	OncoKB: Unknown, level NA;CIViC: NA;MyCancerGenome: not present;CancerHotspot: no;3DHotspot: no	MutationAssessor: NA;SIFT: NA;Polyphen-2: NA	Fusion	NA	amp		NA	NA	WashU	NA	-1	-1	NA										63
Breast Invasive Carcinoma (TCGA, PanCancer Atlas)	TCGA-C8-A8HP-01	Metaplastic Breast Cancer	ERBB2-SDF4	OncoKB: Unknown, level NA;CIViC: NA;MyCancerGenome: not present;CancerHotspot: no;3DHotspot: no	MutationAssessor: NA;SIFT: NA;Polyphen-2: NA	Fusion	NA	amp		NA	NA	WashU	NA	-1	-1	NA										145
Breast Invasive Carcinoma (TCGA, PanCancer Atlas)	TCGA-D8-A1XJ-01	Breast Invasive Carcinoma (NOS)	ERBB2-MED1	OncoKB: Unknown, level NA;CIViC: NA;MyCancerGenome: not present;CancerHotspot: no;3DHotspot: no	MutationAssessor: NA;SIFT: NA;Polyphen-2: NA	Fusion	NA	amp		NA	NA	WashU	NA	-1	-1	NA										81
Breast Invasive Carcinoma (TCGA, PanCancer Atlas)	TCGA-OL-A5RY-01	Breast Invasive Ductal Carcinoma	ERBB2-ZAN	OncoKB: Unknown, level NA;CIViC: NA;MyCancerGenome: not present;CancerHotspot: no;3DHotspot: no	MutationAssessor: NA;SIFT: NA;Polyphen-2: NA	Fusion	NA	amp		NA	NA	WashU	NA	-1	-1	NA										10
Breast Invasive Carcinoma (TCGA, PanCancer Atlas)	TCGA-A8-A08X-01	Breast Invasive Ductal Carcinoma	AP2B1-ERBB2	OncoKB: Unknown, level NA;CIViC: NA;MyCancerGenome: not present;CancerHotspot: no;3DHotspot: no	MutationAssessor: NA;SIFT: NA;Polyphen-2: NA	Fusion	NA	amp		NA	NA	WashU	NA	-1	-1	NA										33
Breast Invasive Carcinoma (TCGA, PanCancer Atlas)	TCGA-A8-A08X-01	Breast Invasive Ductal Carcinoma	PIP4K2B-ERBB2	OncoKB: Unknown, level NA;CIViC: NA;MyCancerGenome: not present;CancerHotspot: no;3DHotspot: no	MutationAssessor: NA;SIFT: NA;Polyphen-2: NA	Fusion	NA	amp		NA	NA	WashU	NA	-1	-1	NA										33
Breast Invasive Carcinoma (TCGA, PanCancer Atlas)	TCGA-BH-A1F2-01	Breast Invasive Ductal Carcinoma	EME1-ERBB2	OncoKB: Unknown, level NA;CIViC: NA;MyCancerGenome: not present;CancerHotspot: no;3DHotspot: no	MutationAssessor: NA;SIFT: NA;Polyphen-2: NA	Fusion	NA	amp		NA	NA	WashU	NA	-1	-1	NA										50
Breast Invasive Carcinoma (TCGA, PanCancer Atlas)	TCGA-C8-A12Q-01	Breast Invasive Ductal Carcinoma	CORO1B-ERBB2	OncoKB: Unknown, level NA;CIViC: NA;MyCancerGenome: not present;CancerHotspot: no;3DHotspot: no	MutationAssessor: NA;SIFT: NA;Polyphen-2: NA	Fusion	NA	amp		NA	NA	WashU	NA	-1	-1	NA										97
Breast Invasive Carcinoma (TCGA, PanCancer Atlas)	TCGA-C8-A275-01	Breast Invasive Ductal Carcinoma	MYO18A-ERBB2	OncoKB: Unknown, level NA;CIViC: NA;MyCancerGenome: not present;CancerHotspot: no;3DHotspot: no	MutationAssessor: NA;SIFT: NA;Polyphen-2: NA	Fusion	NA	amp		NA	NA	WashU	NA	-1	-1	NA										104
Breast Invasive Carcinoma (TCGA, PanCancer Atlas)	TCGA-D8-A1X5-01	Breast Invasive Ductal Carcinoma	ADGRA3-ERBB2	OncoKB: Unknown, level NA;CIViC: NA;MyCancerGenome: not present;CancerHotspot: no;3DHotspot: no	MutationAssessor: NA;SIFT: NA;Polyphen-2: NA	Fusion	NA	amp		NA	NA	WashU	NA	-1	-1	NA										47
Breast Invasive Carcinoma (TCGA, PanCancer Atlas)	TCGA-D8-A1XJ-01	Breast Invasive Carcinoma (NOS)	CACNB1-ERBB2	OncoKB: Unknown, level NA;CIViC: NA;MyCancerGenome: not present;CancerHotspot: no;3DHotspot: no	MutationAssessor: NA;SIFT: NA;Polyphen-2: NA	Fusion	NA	amp		NA	NA	WashU	NA	-1	-1	NA										81
Colorectal Adenocarcinoma (TCGA, PanCancer Atlas)	TCGA-D5-6531-01	Colon Adenocarcinoma	ERBB2-DNAJC7	OncoKB: Unknown, level NA;CIViC: NA;MyCancerGenome: not present;CancerHotspot: no;3DHotspot: no	MutationAssessor: NA;SIFT: NA;Polyphen-2: NA	Fusion	NA	gain		NA	NA	WashU	NA	-1	-1	NA										168
Lung Adenocarcinoma (TCGA, PanCancer Atlas)	TCGA-44-A4SS-01	Lung Adenocarcinoma	ST14-ERBB2	OncoKB: Unknown, level NA;CIViC: NA;MyCancerGenome: not present;CancerHotspot: no;3DHotspot: no	MutationAssessor: NA;SIFT: NA;Polyphen-2: NA	Fusion	NA	amp		NA	NA	WashU	NA	-1	-1	NA										443
Lung Squamous Cell Carcinoma (TCGA, PanCancer Atlas)	TCGA-56-A4BY-01	Lung Squamous Cell Carcinoma	ERBB2-TCAP	OncoKB: Unknown, level NA;CIViC: NA;MyCancerGenome: not present;CancerHotspot: no;3DHotspot: no	MutationAssessor: NA;SIFT: NA;Polyphen-2: NA	Fusion	NA	gain		NA	NA	WashU	NA	-1	-1	NA										128
Lung Squamous Cell Carcinoma (TCGA, PanCancer Atlas)	TCGA-L3-A524-01	Lung Squamous Cell Carcinoma	CASC3-ERBB2	OncoKB: Unknown, level NA;CIViC: NA;MyCancerGenome: not present;CancerHotspot: no;3DHotspot: no	MutationAssessor: NA;SIFT: NA;Polyphen-2: NA	Fusion	NA	gain		NA	NA	WashU	NA	-1	-1	NA										299
Ovarian Serous Cystadenocarcinoma (TCGA, PanCancer Atlas)	TCGA-25-1320-01	Serous Ovarian Cancer	ERBB2-MAGI2-AS2	OncoKB: Unknown, level NA;CIViC: NA;MyCancerGenome: not present;CancerHotspot: no;3DHotspot: no	MutationAssessor: NA;SIFT: NA;Polyphen-2: NA	Fusion	NA	amp		NA	NA	WashU	NA	-1	-1	NA										114
Stomach Adenocarcinoma (TCGA, PanCancer Atlas)	TCGA-D7-8573-01	Tubular Stomach Adenocarcinoma	ERBB2-WIPF2	OncoKB: Unknown, level NA;CIViC: NA;MyCancerGenome: not present;CancerHotspot: no;3DHotspot: no	MutationAssessor: NA;SIFT: NA;Polyphen-2: NA	Fusion	NA	gain		NA	NA	WashU	NA	-1	-1	NA										73
Stomach Adenocarcinoma (TCGA, PanCancer Atlas)	TCGA-VQ-A8DZ-01	Signet Ring Cell Carcinoma of the Stomach	ERBB2-WSB1	OncoKB: Unknown, level NA;CIViC: NA;MyCancerGenome: not present;CancerHotspot: no;3DHotspot: no	MutationAssessor: NA;SIFT: NA;Polyphen-2: NA	Fusion	NA	amp		NA	NA	WashU	NA	-1	-1	NA										76
Stomach Adenocarcinoma (TCGA, PanCancer Atlas)	TCGA-BR-8483-01	Intestinal Type Stomach Adenocarcinoma	FKBP10-ERBB2	OncoKB: Unknown, level NA;CIViC: NA;MyCancerGenome: not present;CancerHotspot: no;3DHotspot: no	MutationAssessor: NA;SIFT: NA;Polyphen-2: NA	Fusion	NA	amp		NA	NA	WashU	NA	-1	-1	NA										112
Stomach Adenocarcinoma (TCGA, PanCancer Atlas)	TCGA-CD-5799-01	Intestinal Type Stomach Adenocarcinoma	CPD-ERBB2	OncoKB: Unknown, level NA;CIViC: NA;MyCancerGenome: not present;CancerHotspot: no;3DHotspot: no	MutationAssessor: NA;SIFT: NA;Polyphen-2: NA	Fusion	NA	amp		NA	NA	WashU	NA	-1	-1	NA										35
Stomach Adenocarcinoma (TCGA, PanCancer Atlas)	TCGA-R5-A7ZE-01	Tubular Stomach Adenocarcinoma	WIPF2-ERBB2	OncoKB: Unknown, level NA;CIViC: NA;MyCancerGenome: not present;CancerHotspot: no;3DHotspot: no	MutationAssessor: NA;SIFT: NA;Polyphen-2: NA	Fusion	NA	amp		NA	NA	WashU	NA	-1	-1	NA										148
Uterine Corpus Endometrial Carcinoma (TCGA, PanCancer Atlas)	TCGA-EY-A3QX-01	Uterine Serous Carcinoma/Uterine Papillary Serous Carcinoma	ERBB2-PVT1	OncoKB: Unknown, level NA;CIViC: NA;MyCancerGenome: not present;CancerHotspot: no;3DHotspot: no	MutationAssessor: NA;SIFT: NA;Polyphen-2: NA	Fusion	NA	amp		NA	NA	WashU	NA	-1	-1	NA										47
Uterine Corpus Endometrial Carcinoma (TCGA, PanCancer Atlas)	TCGA-EY-A54A-01	Uterine Endometrioid Carcinoma	ERBB2-NOL12	OncoKB: Unknown, level NA;CIViC: NA;MyCancerGenome: not present;CancerHotspot: no;3DHotspot: no	MutationAssessor: NA;SIFT: NA;Polyphen-2: NA	Fusion	NA	amp		NA	NA	WashU	NA	-1	-1	NA										102
Breast Invasive Carcinoma (TCGA, PanCancer Atlas)	TCGA-D8-A1JG-01	Breast Invasive Ductal Carcinoma	Y1127_A1129del	OncoKB: Unknown, level NA;CIViC: NA;MyCancerGenome: not present;CancerHotspot: no;3DHotspot: no	MutationAssessor: NA;SIFT: NA;Polyphen-2: NA	In_Frame_Del	DEL	gain		.	.	.	17	37883766	37883774	CTACGTTGC	-	17:g.37883766_37883774del	ENST00000269571.5:c.3379_3387del	0.25		8	24		8	133	26/27
Lung Adenocarcinoma (TCGA, PanCancer Atlas)	TCGA-05-5715-01	Lung Adenocarcinoma	Y772_A775dup	OncoKB: Oncogenic, level_2;CIViC: NA;MyCancerGenome: not present;CancerHotspot: yes;3DHotspot: no	MutationAssessor: NA;SIFT: NA;Polyphen-2: NA	In_Frame_Ins	INS	gain		.	.	.	17	37880981	37880982	-	GCATACGTGATG	17:g.37880981_37880982insGCATACGTGATG	ENST00000269571.5:c.2313_2324dup	0.19		13	56		66	105	20/27
Lung Adenocarcinoma (TCGA, PanCancer Atlas)	TCGA-44-3396-01	Lung Adenocarcinoma	Y772_A775dup	OncoKB: Oncogenic, level_2;CIViC: NA;MyCancerGenome: not present;CancerHotspot: yes;3DHotspot: no	MutationAssessor: NA;SIFT: NA;Polyphen-2: NA	In_Frame_Ins	INS	gain		.	.	.	17	37880981	37880982	-	GCATACGTGATG	17:g.37880981_37880982insGCATACGTGATG	ENST00000269571.5:c.2313_2324dup	0.08		11	128		101	184	20/27
Lung Adenocarcinoma (TCGA, PanCancer Atlas)	TCGA-86-6562-01	Lung Adenocarcinoma	G776delinsVC	OncoKB: Oncogenic, level_2;CIViC: NA;MyCancerGenome: not present;CancerHotspot: no;3DHotspot: no	MutationAssessor: NA;SIFT: NA;Polyphen-2: NA	In_Frame_Ins	INS	gain		.	.	.	17	37880997	37880998	-	TCT	17:g.37880997_37880998insTCT	ENST00000269571.5:c.2326_2327insTCT	0.23		12	41		74	52	20/27
Lung Adenocarcinoma (TCGA, PanCancer Atlas)	TCGA-05-4434-01	Lung Adenocarcinoma	G776delinsVC	OncoKB: Oncogenic, level_2;CIViC: NA;MyCancerGenome: not present;CancerHotspot: no;3DHotspot: no	MutationAssessor: NA;SIFT: NA;Polyphen-2: NA	In_Frame_Ins	INS	diploid		.	.	.	17	37880997	37880998	-	TAT	17:g.37880997_37880998insTAT	ENST00000269571.5:c.2326_2327insTAT	0.3		17	39		62	44	20/27
Esophageal Adenocarcinoma (TCGA, PanCancer Atlas)	TCGA-L5-A4OU-01	Esophageal Adenocarcinoma	M774dup	OncoKB: Oncogenic, level_3b;CIViC: NA;MyCancerGenome: not present;CancerHotspot: yes;3DHotspot: no	MutationAssessor: NA;SIFT: NA;Polyphen-2: NA	In_Frame_Ins	INS	amp		.	.	.	17	37880988	37880989	-	TGA	17:g.37880988_37880989insTGA	ENST00000269571.5:c.2320_2322dup	0.82		267	58		96	150	20/27
Bladder Urothelial Carcinoma (TCGA, PanCancer Atlas)	TCGA-FD-A3SN-01	Bladder Urothelial Carcinoma	R103Q	OncoKB: Predicted Oncogenic, level_3b;CIViC: NA;MyCancerGenome: not present;CancerHotspot: yes;3DHotspot: no	MutationAssessor: impact: medium, score: 3.15;SIFT: impact: deleterious, score: 0;Polyphen-2: impact: probably_damaging, score: 1	Missense_Mutation	SNP	shallowdel		.	.	.	17	37864656	37864656	G	A	17:g.37864656G>A	ENST00000269571.5:c.308G>A	0.5		28	28		169	335	2020-03-27			rs950730453
Bladder Urothelial Carcinoma (TCGA, PanCancer Atlas)	TCGA-ZF-A9RC-01	Bladder Urothelial Carcinoma	R103Q	OncoKB: Predicted Oncogenic, level_3b;CIViC: NA;MyCancerGenome: not present;CancerHotspot: yes;3DHotspot: no	MutationAssessor: impact: medium, score: 3.15;SIFT: impact: deleterious, score: 0;Polyphen-2: impact: probably_damaging, score: 1	Missense_Mutation	SNP	gain		.	.	.	17	37864656	37864656	G	A	17:g.37864656G>A	ENST00000269571.5:c.308G>A	0.15		17	93		121	849	2020-03-27			rs950730453
Bladder Urothelial Carcinoma (TCGA, PanCancer Atlas)	TCGA-DK-A1A3-01	Bladder Urothelial Carcinoma	S310F	OncoKB: Oncogenic, level_3b;CIViC: NA;MyCancerGenome: not present;CancerHotspot: yes;3DHotspot: no	MutationAssessor: impact: medium, score: 2.655;SIFT: impact: deleterious, score: 0;Polyphen-2: impact: probably_damaging, score: 0.995	Missense_Mutation	SNP	diploid	29	.	.	.	17	37868208	37868208	C	T	17:g.37868208C>T	ENST00000269571.5:c.929C>T	0.17		51	256		356	566	2020-08-27		376189	rs1057519816
Bladder Urothelial Carcinoma (TCGA, PanCancer Atlas)	TCGA-DK-A6B6-01	Bladder Urothelial Carcinoma	S310F	OncoKB: Oncogenic, level_3b;CIViC: NA;MyCancerGenome: not present;CancerHotspot: yes;3DHotspot: no	MutationAssessor: impact: medium, score: 2.655;SIFT: impact: deleterious, score: 0;Polyphen-2: impact: probably_damaging, score: 0.995	Missense_Mutation	SNP	gain	29	.	.	.	17	37868208	37868208	C	T	17:g.37868208C>T	ENST00000269571.5:c.929C>T	0.31		92	207		284	796	2020-08-27		376189	rs1057519816
Bladder Urothelial Carcinoma (TCGA, PanCancer Atlas)	TCGA-DK-AA6L-01	Bladder Urothelial Carcinoma	S310F	OncoKB: Oncogenic, level_3b;CIViC: NA;MyCancerGenome: not present;CancerHotspot: yes;3DHotspot: no	MutationAssessor: impact: medium, score: 2.655;SIFT: impact: deleterious, score: 0;Polyphen-2: impact: probably_damaging, score: 0.995	Missense_Mutation	SNP	diploid	29	.	.	.	17	37868208	37868208	C	T	17:g.37868208C>T	ENST00000269571.5:c.929C>T	0.23		43	141		191	384	2020-08-27		376189	rs1057519816
Bladder Urothelial Carcinoma (TCGA, PanCancer Atlas)	TCGA-GC-A3YS-01	Bladder Urothelial Carcinoma	S310F	OncoKB: Oncogenic, level_3b;CIViC: NA;MyCancerGenome: not present;CancerHotspot: yes;3DHotspot: no	MutationAssessor: impact: medium, score: 2.655;SIFT: impact: deleterious, score: 0;Polyphen-2: impact: probably_damaging, score: 0.995	Missense_Mutation	SNP	shallowdel	29	.	.	.	17	37868208	37868208	C	T	17:g.37868208C>T	ENST00000269571.5:c.929C>T	0.4		105	158		309	217	2020-08-27		376189	rs1057519816
Bladder Urothelial Carcinoma (TCGA, PanCancer Atlas)	TCGA-GC-A4ZW-01	Bladder Urothelial Carcinoma	S310F	OncoKB: Oncogenic, level_3b;CIViC: NA;MyCancerGenome: not present;CancerHotspot: yes;3DHotspot: no	MutationAssessor: impact: medium, score: 2.655;SIFT: impact: deleterious, score: 0;Polyphen-2: impact: probably_damaging, score: 0.995	Missense_Mutation	SNP	gain	29	.	.	.	17	37868208	37868208	C	T	17:g.37868208C>T	ENST00000269571.5:c.929C>T	0.51		137	130		225	622	2020-08-27		376189	rs1057519816
Bladder Urothelial Carcinoma (TCGA, PanCancer Atlas)	TCGA-GV-A6ZA-01	Bladder Urothelial Carcinoma	S310F	OncoKB: Oncogenic, level_3b;CIViC: NA;MyCancerGenome: not present;CancerHotspot: yes;3DHotspot: no	MutationAssessor: impact: medium, score: 2.655;SIFT: impact: deleterious, score: 0;Polyphen-2: impact: probably_damaging, score: 0.995	Missense_Mutation	SNP	diploid	29	.	.	.	17	37868208	37868208	C	T	17:g.37868208C>T	ENST00000269571.5:c.929C>T	0.86		204	32		211	293	2020-08-27		376189	rs1057519816
Bladder Urothelial Carcinoma (TCGA, PanCancer Atlas)	TCGA-K4-A5RJ-01	Bladder Urothelial Carcinoma	S310F	OncoKB: Oncogenic, level_3b;CIViC: NA;MyCancerGenome: not present;CancerHotspot: yes;3DHotspot: no	MutationAssessor: impact: medium, score: 2.655;SIFT: impact: deleterious, score: 0;Polyphen-2: impact: probably_damaging, score: 0.995	Missense_Mutation	SNP	diploid	29	.	.	.	17	37868208	37868208	C	T	17:g.37868208C>T	ENST00000269571.5:c.929C>T	0.2		73	284		319	321	2020-08-27		376189	rs1057519816
Bladder Urothelial Carcinoma (TCGA, PanCancer Atlas)	TCGA-K4-A6FZ-01	Bladder Urothelial Carcinoma	S310F	OncoKB: Oncogenic, level_3b;CIViC: NA;MyCancerGenome: not present;CancerHotspot: yes;3DHotspot: no	MutationAssessor: impact: medium, score: 2.655;SIFT: impact: deleterious, score: 0;Polyphen-2: impact: probably_damaging, score: 0.995	Missense_Mutation	SNP	gain	29	.	.	.	17	37868208	37868208	C	T	17:g.37868208C>T	ENST00000269571.5:c.929C>T	0.22		71	245		384	358	2020-08-27		376189	rs1057519816
Bladder Urothelial Carcinoma (TCGA, PanCancer Atlas)	TCGA-K4-A83P-01	Bladder Urothelial Carcinoma	S310F	OncoKB: Oncogenic, level_3b;CIViC: NA;MyCancerGenome: not present;CancerHotspot: yes;3DHotspot: no	MutationAssessor: impact: medium, score: 2.655;SIFT: impact: deleterious, score: 0;Polyphen-2: impact: probably_damaging, score: 0.995	Missense_Mutation	SNP	diploid	29	.	.	.	17	37868208	37868208	C	T	17:g.37868208C>T	ENST00000269571.5:c.929C>T	0.12		34	261		244	250	2020-08-27		376189	rs1057519816
Bladder Urothelial Carcinoma (TCGA, PanCancer Atlas)	TCGA-SY-A9G5-01	Bladder Urothelial Carcinoma	S310F	OncoKB: Oncogenic, level_3b;CIViC: NA;MyCancerGenome: not present;CancerHotspot: yes;3DHotspot: no	MutationAssessor: impact: medium, score: 2.655;SIFT: impact: deleterious, score: 0;Polyphen-2: impact: probably_damaging, score: 0.995	Missense_Mutation	SNP	gain	29	.	.	.	17	37868208	37868208	C	T	17:g.37868208C>T	ENST00000269571.5:c.929C>T	0.24		55	175		240	925	2020-08-27		376189	rs1057519816
Bladder Urothelial Carcinoma (TCGA, PanCancer Atlas)	TCGA-XF-A8HC-01	Bladder Urothelial Carcinoma	S310F	OncoKB: Oncogenic, level_3b;CIViC: NA;MyCancerGenome: not present;CancerHotspot: yes;3DHotspot: no	MutationAssessor: impact: medium, score: 2.655;SIFT: impact: deleterious, score: 0;Polyphen-2: impact: probably_damaging, score: 0.995	Missense_Mutation	SNP	gain	29	.	.	.	17	37868208	37868208	C	T	17:g.37868208C>T	ENST00000269571.5:c.929C>T	0.5		106	108		215	118	2020-08-27		376189	rs1057519816
Bladder Urothelial Carcinoma (TCGA, PanCancer Atlas)	TCGA-XF-A9SM-01	Bladder Urothelial Carcinoma	S310F	OncoKB: Oncogenic, level_3b;CIViC: NA;MyCancerGenome: not present;CancerHotspot: yes;3DHotspot: no	MutationAssessor: impact: medium, score: 2.655;SIFT: impact: deleterious, score: 0;Polyphen-2: impact: probably_damaging, score: 0.995	Missense_Mutation	SNP	diploid	29	.	.	.	17	37868208	37868208	C	T	17:g.37868208C>T	ENST00000269571.5:c.929C>T	0.29		51	122		130	218	2020-08-27		376189	rs1057519816
Bladder Urothelial Carcinoma (TCGA, PanCancer Atlas)	TCGA-XF-A9ST-01	Bladder Urothelial Carcinoma	S310F	OncoKB: Oncogenic, level_3b;CIViC: NA;MyCancerGenome: not present;CancerHotspot: yes;3DHotspot: no	MutationAssessor: impact: medium, score: 2.655;SIFT: impact: deleterious, score: 0;Polyphen-2: impact: probably_damaging, score: 0.995	Missense_Mutation	SNP	diploid	29	.	.	.	17	37868208	37868208	C	T	17:g.37868208C>T	ENST00000269571.5:c.929C>T	0.51		72	69		170	522	2020-08-27		376189	rs1057519816
Bladder Urothelial Carcinoma (TCGA, PanCancer Atlas)	TCGA-XF-AAML-01	Bladder Urothelial Carcinoma	S310F	OncoKB: Oncogenic, level_3b;CIViC: NA;MyCancerGenome: not present;CancerHotspot: yes;3DHotspot: no	MutationAssessor: impact: medium, score: 2.655;SIFT: impact: deleterious, score: 0;Polyphen-2: impact: probably_damaging, score: 0.995	Missense_Mutation	SNP	gain	29	.	.	.	17	37868208	37868208	C	T	17:g.37868208C>T	ENST00000269571.5:c.929C>T	0.2		35	142		139	448	2020-08-27		376189	rs1057519816
Bladder Urothelial Carcinoma (TCGA, PanCancer Atlas)	TCGA-XF-AAMX-01	Bladder Urothelial Carcinoma	S310F	OncoKB: Oncogenic, level_3b;CIViC: NA;MyCancerGenome: not present;CancerHotspot: yes;3DHotspot: no	MutationAssessor: impact: medium, score: 2.655;SIFT: impact: deleterious, score: 0;Polyphen-2: impact: probably_damaging, score: 0.995	Missense_Mutation	SNP	shallowdel	29	.	.	.	17	37868208	37868208	C	T	17:g.37868208C>T	ENST00000269571.5:c.929C>T	0.82		84	18		153	302	2020-08-27		376189	rs1057519816
Bladder Urothelial Carcinoma (TCGA, PanCancer Atlas)	TCGA-XF-AAN0-01	Bladder Urothelial Carcinoma	S310F	OncoKB: Oncogenic, level_3b;CIViC: NA;MyCancerGenome: not present;CancerHotspot: yes;3DHotspot: no	MutationAssessor: impact: medium, score: 2.655;SIFT: impact: deleterious, score: 0;Polyphen-2: impact: probably_damaging, score: 0.995	Missense_Mutation	SNP	gain	29	.	.	.	17	37868208	37868208	C	T	17:g.37868208C>T	ENST00000269571.5:c.929C>T	0.25		53	159		163	383	2020-08-27		376189	rs1057519816
Bladder Urothelial Carcinoma (TCGA, PanCancer Atlas)	TCGA-XF-AAN2-01	Bladder Urothelial Carcinoma	S310F	OncoKB: Oncogenic, level_3b;CIViC: NA;MyCancerGenome: not present;CancerHotspot: yes;3DHotspot: no	MutationAssessor: impact: medium, score: 2.655;SIFT: impact: deleterious, score: 0;Polyphen-2: impact: probably_damaging, score: 0.995	Missense_Mutation	SNP	diploid	29	.	.	.	17	37868208	37868208	C	T	17:g.37868208C>T	ENST00000269571.5:c.929C>T	0.33		118	235		167	411	2020-08-27		376189	rs1057519816
Bladder Urothelial Carcinoma (TCGA, PanCancer Atlas)	TCGA-XF-AAN5-01	Bladder Urothelial Carcinoma	S310F	OncoKB: Oncogenic, level_3b;CIViC: NA;MyCancerGenome: not present;CancerHotspot: yes;3DHotspot: no	MutationAssessor: impact: medium, score: 2.655;SIFT: impact: deleterious, score: 0;Polyphen-2: impact: probably_damaging, score: 0.995	Missense_Mutation	SNP	diploid	29	.	.	.	17	37868208	37868208	C	T	17:g.37868208C>T	ENST00000269571.5:c.929C>T	0.24		34	109		157	295	2020-08-27		376189	rs1057519816
Bladder Urothelial Carcinoma (TCGA, PanCancer Atlas)	TCGA-ZF-AA4V-01	Bladder Urothelial Carcinoma	S310F	OncoKB: Oncogenic, level_3b;CIViC: NA;MyCancerGenome: not present;CancerHotspot: yes;3DHotspot: no	MutationAssessor: impact: medium, score: 2.655;SIFT: impact: deleterious, score: 0;Polyphen-2: impact: probably_damaging, score: 0.995	Missense_Mutation	SNP	gain	29	.	.	.	17	37868208	37868208	C	T	17:g.37868208C>T	ENST00000269571.5:c.929C>T	0.18		51	225		229	581	2020-08-27		376189	rs1057519816
Breast Invasive Carcinoma (TCGA, PanCancer Atlas)	TCGA-A2-A3XV-01	Breast Invasive Ductal Carcinoma	S310F	OncoKB: Oncogenic, level_3a;CIViC: NA;MyCancerGenome: not present;CancerHotspot: yes;3DHotspot: no	MutationAssessor: impact: medium, score: 2.655;SIFT: impact: deleterious, score: 0;Polyphen-2: impact: probably_damaging, score: 0.995	Missense_Mutation	SNP	amp	29	.	.	.	17	37868208	37868208	C	T	17:g.37868208C>T	ENST00000269571.5:c.929C>T	0.67		142	69		85	38	2020-08-27		376189	rs1057519816
Cervical Squamous Cell Carcinoma (TCGA, PanCancer Atlas)	TCGA-C5-A1MJ-01	Endocervical Adenocarcinoma	S310F	OncoKB: Oncogenic, level_3b;CIViC: NA;MyCancerGenome: not present;CancerHotspot: yes;3DHotspot: no	MutationAssessor: impact: medium, score: 2.655;SIFT: impact: deleterious, score: 0;Polyphen-2: impact: probably_damaging, score: 0.995	Missense_Mutation	SNP	diploid	29	.	.	.	17	37868208	37868208	C	T	17:g.37868208C>T	ENST00000269571.5:c.929C>T	0.38		119	191		328	82	2020-08-27		376189	rs1057519816
Cervical Squamous Cell Carcinoma (TCGA, PanCancer Atlas)	TCGA-FU-A3NI-01	Cervical Squamous Cell Carcinoma	S310F	OncoKB: Oncogenic, level_3b;CIViC: NA;MyCancerGenome: not present;CancerHotspot: yes;3DHotspot: no	MutationAssessor: impact: medium, score: 2.655;SIFT: impact: deleterious, score: 0;Polyphen-2: impact: probably_damaging, score: 0.995	Missense_Mutation	SNP	diploid	29	.	.	.	17	37868208	37868208	C	T	17:g.37868208C>T	ENST00000269571.5:c.929C>T	0.26		15	42		83	93	2020-08-27		376189	rs1057519816
Cervical Squamous Cell Carcinoma (TCGA, PanCancer Atlas)	TCGA-IR-A3LI-01	Endocervical Adenocarcinoma	S310F	OncoKB: Oncogenic, level_3b;CIViC: NA;MyCancerGenome: not present;CancerHotspot: yes;3DHotspot: no	MutationAssessor: impact: medium, score: 2.655;SIFT: impact: deleterious, score: 0;Polyphen-2: impact: probably_damaging, score: 0.995	Missense_Mutation	SNP	diploid	29	.	.	.	17	37868208	37868208	C	T	17:g.37868208C>T	ENST00000269571.5:c.929C>T	0.49		41	42		65	305	2020-08-27		376189	rs1057519816
Cervical Squamous Cell Carcinoma (TCGA, PanCancer Atlas)	TCGA-JW-A852-01	Cervical Squamous Cell Carcinoma	S310F	OncoKB: Oncogenic, level_3b;CIViC: NA;MyCancerGenome: not present;CancerHotspot: yes;3DHotspot: no	MutationAssessor: impact: medium, score: 2.655;SIFT: impact: deleterious, score: 0;Polyphen-2: impact: probably_damaging, score: 0.995	Missense_Mutation	SNP	diploid	29	.	.	.	17	37868208	37868208	C	T	17:g.37868208C>T	ENST00000269571.5:c.929C>T	0.5		18	18		84	79	2020-08-27		376189	rs1057519816
Colorectal Adenocarcinoma (TCGA, PanCancer Atlas)	TCGA-G4-6298-01	Colon Adenocarcinoma	S310F	OncoKB: Oncogenic, level_3b;CIViC: NA;MyCancerGenome: not present;CancerHotspot: yes;3DHotspot: no	MutationAssessor: impact: medium, score: 2.655;SIFT: impact: deleterious, score: 0;Polyphen-2: impact: probably_damaging, score: 0.995	Missense_Mutation	SNP	diploid	29	.	.	.	17	37868208	37868208	C	T	17:g.37868208C>T	ENST00000269571.5:c.929C>T	0.29		36	90		33	82	2020-08-27		376189	rs1057519816
Esophageal Adenocarcinoma (TCGA, PanCancer Atlas)	TCGA-JY-A938-01	Esophageal Adenocarcinoma	S310F	OncoKB: Oncogenic, level_3b;CIViC: NA;MyCancerGenome: not present;CancerHotspot: yes;3DHotspot: no	MutationAssessor: impact: medium, score: 2.655;SIFT: impact: deleterious, score: 0;Polyphen-2: impact: probably_damaging, score: 0.995	Missense_Mutation	SNP	amp	29	.	.	.	17	37868208	37868208	C	T	17:g.37868208C>T	ENST00000269571.5:c.929C>T	0.4		19	29		28	126	2020-08-27		376189	rs1057519816
Esophageal Adenocarcinoma (TCGA, PanCancer Atlas)	TCGA-R6-A8WC-01	Esophageal Adenocarcinoma	S310F	OncoKB: Oncogenic, level_3b;CIViC: NA;MyCancerGenome: not present;CancerHotspot: yes;3DHotspot: no	MutationAssessor: impact: medium, score: 2.655;SIFT: impact: deleterious, score: 0;Polyphen-2: impact: probably_damaging, score: 0.995	Missense_Mutation	SNP	amp	29	.	.	.	17	37868208	37868208	C	T	17:g.37868208C>T	ENST00000269571.5:c.929C>T	0.92		448	39		40	124	2020-08-27		376189	rs1057519816
Head and Neck Squamous Cell Carcinoma (TCGA, PanCancer Atlas)	TCGA-D6-A74Q-01	Head and Neck Squamous Cell Carcinoma	S310F	OncoKB: Oncogenic, level_3b;CIViC: NA;MyCancerGenome: not present;CancerHotspot: yes;3DHotspot: no	MutationAssessor: impact: medium, score: 2.655;SIFT: impact: deleterious, score: 0;Polyphen-2: impact: probably_damaging, score: 0.995	Missense_Mutation	SNP	diploid	29	.	.	.	17	37868208	37868208	C	T	17:g.37868208C>T	ENST00000269571.5:c.929C>T	0.33		85	171		269	373	2020-08-27		376189	rs1057519816
Lung Adenocarcinoma (TCGA, PanCancer Atlas)	TCGA-44-2656-01	Lung Adenocarcinoma	S310F	OncoKB: Oncogenic, level_2;CIViC: NA;MyCancerGenome: not present;CancerHotspot: yes;3DHotspot: no	MutationAssessor: impact: medium, score: 2.655;SIFT: impact: deleterious, score: 0;Polyphen-2: impact: probably_damaging, score: 0.995	Missense_Mutation	SNP	diploid	29	.	.	.	17	37868208	37868208	C	T	17:g.37868208C>T	ENST00000269571.5:c.929C>T	0.29		96	234		321	766	2020-08-27		376189	rs1057519816
Ovarian Serous Cystadenocarcinoma (TCGA, PanCancer Atlas)	TCGA-36-2530-01	Serous Ovarian Cancer	S310F	OncoKB: Oncogenic, level_3b;CIViC: NA;MyCancerGenome: not present;CancerHotspot: yes;3DHotspot: no	MutationAssessor: impact: medium, score: 2.655;SIFT: impact: deleterious, score: 0;Polyphen-2: impact: probably_damaging, score: 0.995	Missense_Mutation	SNP	shallowdel	29	.	.	.	17	37868208	37868208	C	T	17:g.37868208C>T	ENST00000269571.5:c.929C>T	0.93		115	9		217	68	2020-08-27		376189	rs1057519816
Ovarian Serous Cystadenocarcinoma (TCGA, PanCancer Atlas)	TCGA-13-0889-01	Serous Ovarian Cancer	S310F	OncoKB: Oncogenic, level_3b;CIViC: NA;MyCancerGenome: not present;CancerHotspot: yes;3DHotspot: no	MutationAssessor: impact: medium, score: 2.655;SIFT: impact: deleterious, score: 0;Polyphen-2: impact: probably_damaging, score: 0.995	Missense_Mutation	SNP	shallowdel	29	.	.	.	17	37868208	37868208	C	T	17:g.37868208C>T	ENST00000269571.5:c.929C>T	0.57		20	15		58	1066	2020-08-27		376189	rs1057519816
Stomach Adenocarcinoma (TCGA, PanCancer Atlas)	TCGA-BR-4370-01	Stomach Adenocarcinoma	S310F	OncoKB: Oncogenic, level_3b;CIViC: NA;MyCancerGenome: not present;CancerHotspot: yes;3DHotspot: no	MutationAssessor: impact: medium, score: 2.655;SIFT: impact: deleterious, score: 0;Polyphen-2: impact: probably_damaging, score: 0.995	Missense_Mutation	SNP	diploid	29	.	.	.	17	37868208	37868208	C	T	17:g.37868208C>T	ENST00000269571.5:c.929C>T	0.19		101	423		415	980	2020-08-27		376189	rs1057519816
Stomach Adenocarcinoma (TCGA, PanCancer Atlas)	TCGA-BR-7957-01	Intestinal Type Stomach Adenocarcinoma	S310F	OncoKB: Oncogenic, level_3b;CIViC: NA;MyCancerGenome: not present;CancerHotspot: yes;3DHotspot: no	MutationAssessor: impact: medium, score: 2.655;SIFT: impact: deleterious, score: 0;Polyphen-2: impact: probably_damaging, score: 0.995	Missense_Mutation	SNP	diploid	29	.	.	.	17	37868208	37868208	C	T	17:g.37868208C>T	ENST00000269571.5:c.929C>T	0.04		8	172		240	47	2020-08-27		376189	rs1057519816
Stomach Adenocarcinoma (TCGA, PanCancer Atlas)	TCGA-BR-8588-01	Stomach Adenocarcinoma	S310F	OncoKB: Oncogenic, level_3b;CIViC: NA;MyCancerGenome: not present;CancerHotspot: yes;3DHotspot: no	MutationAssessor: impact: medium, score: 2.655;SIFT: impact: deleterious, score: 0;Polyphen-2: impact: probably_damaging, score: 0.995	Missense_Mutation	SNP	diploid	29	.	.	.	17	37868208	37868208	C	T	17:g.37868208C>T	ENST00000269571.5:c.929C>T	0.24		64	206		252	103	2020-08-27		376189	rs1057519816
Stomach Adenocarcinoma (TCGA, PanCancer Atlas)	TCGA-CG-5730-01	Intestinal Type Stomach Adenocarcinoma	S310F	OncoKB: Oncogenic, level_3b;CIViC: NA;MyCancerGenome: not present;CancerHotspot: yes;3DHotspot: no	MutationAssessor: impact: medium, score: 2.655;SIFT: impact: deleterious, score: 0;Polyphen-2: impact: probably_damaging, score: 0.995	Missense_Mutation	SNP	amp	29	.	.	.	17	37868208	37868208	C	T	17:g.37868208C>T	ENST00000269571.5:c.929C>T	0.96	0.0049	4532	206	2	408	130	2020-08-27		376189	rs1057519816
Stomach Adenocarcinoma (TCGA, PanCancer Atlas)	TCGA-VQ-A8PD-01	Stomach Adenocarcinoma	S310F	OncoKB: Oncogenic, level_3b;CIViC: NA;MyCancerGenome: not present;CancerHotspot: yes;3DHotspot: no	MutationAssessor: impact: medium, score: 2.655;SIFT: impact: deleterious, score: 0;Polyphen-2: impact: probably_damaging, score: 0.995	Missense_Mutation	SNP	diploid	29	.	.	.	17	37868208	37868208	C	T	17:g.37868208C>T	ENST00000269571.5:c.929C>T	0.03		7	230		180	76	2020-08-27		376189	rs1057519816
Uterine Corpus Endometrial Carcinoma (TCGA, PanCancer Atlas)	TCGA-SL-A6J9-01	Uterine Endometrioid Carcinoma	S310F	OncoKB: Oncogenic, level_3b;CIViC: NA;MyCancerGenome: not present;CancerHotspot: yes;3DHotspot: no	MutationAssessor: impact: medium, score: 2.655;SIFT: impact: deleterious, score: 0;Polyphen-2: impact: probably_damaging, score: 0.995	Missense_Mutation	SNP	gain	29	.	.	.	17	37868208	37868208	C	T	17:g.37868208C>T	ENST00000269571.5:c.929C>T	0.16		7	37		47	47	2020-08-27		376189	rs1057519816
Bladder Urothelial Carcinoma (TCGA, PanCancer Atlas)	TCGA-GU-A766-01	Bladder Urothelial Carcinoma	S310Y	OncoKB: Oncogenic, level_3b;CIViC: NA;MyCancerGenome: not present;CancerHotspot: yes;3DHotspot: no	MutationAssessor: impact: medium, score: 2.51;SIFT: impact: deleterious, score: 0;Polyphen-2: impact: probably_damaging, score: 0.995	Missense_Mutation	SNP	diploid	29	.	.	.	17	37868208	37868208	C	A	17:g.37868208C>A	ENST00000269571.5:c.929C>A	0.3		81	186		293	168	2020-08-27		376188	rs1057519816
Bladder Urothelial Carcinoma (TCGA, PanCancer Atlas)	TCGA-GU-A767-01	Bladder Urothelial Carcinoma	S310Y	OncoKB: Oncogenic, level_3b;CIViC: NA;MyCancerGenome: not present;CancerHotspot: yes;3DHotspot: no	MutationAssessor: impact: medium, score: 2.51;SIFT: impact: deleterious, score: 0;Polyphen-2: impact: probably_damaging, score: 0.995	Missense_Mutation	SNP	gain	29	.	.	.	17	37868208	37868208	C	A	17:g.37868208C>A	ENST00000269571.5:c.929C>A	0.05		15	276		297	367	2020-08-27		376188	rs1057519816
Bladder Urothelial Carcinoma (TCGA, PanCancer Atlas)	TCGA-KQ-A41S-01	Bladder Urothelial Carcinoma	S310Y	OncoKB: Oncogenic, level_3b;CIViC: NA;MyCancerGenome: not present;CancerHotspot: yes;3DHotspot: no	MutationAssessor: impact: medium, score: 2.51;SIFT: impact: deleterious, score: 0;Polyphen-2: impact: probably_damaging, score: 0.995	Missense_Mutation	SNP	gain	29	.	.	.	17	37868208	37868208	C	A	17:g.37868208C>A	ENST00000269571.5:c.929C>A	0.04		14	313		303	238	2020-08-27		376188	rs1057519816
Cervical Squamous Cell Carcinoma (TCGA, PanCancer Atlas)	TCGA-VS-A8QA-01	Cervical Squamous Cell Carcinoma	S310Y	OncoKB: Oncogenic, level_3b;CIViC: NA;MyCancerGenome: not present;CancerHotspot: yes;3DHotspot: no	MutationAssessor: impact: medium, score: 2.51;SIFT: impact: deleterious, score: 0;Polyphen-2: impact: probably_damaging, score: 0.995	Missense_Mutation	SNP	diploid	29	.	.	.	17	37868208	37868208	C	A	17:g.37868208C>A	ENST00000269571.5:c.929C>A	0.48		20	22		48	163	2020-08-27		376188	rs1057519816
Stomach Adenocarcinoma (TCGA, PanCancer Atlas)	TCGA-MX-A5UJ-01	Tubular Stomach Adenocarcinoma	S310Y	OncoKB: Oncogenic, level_3b;CIViC: NA;MyCancerGenome: not present;CancerHotspot: yes;3DHotspot: no	MutationAssessor: impact: medium, score: 2.51;SIFT: impact: deleterious, score: 0;Polyphen-2: impact: probably_damaging, score: 0.995	Missense_Mutation	SNP	diploid	29	.	.	.	17	37868208	37868208	C	A	17:g.37868208C>A	ENST00000269571.5:c.929C>A	0.2	0.0037	68	273	1	270	1294	2020-08-27		376188	rs1057519816
Bladder Urothelial Carcinoma (TCGA, PanCancer Atlas)	TCGA-ZF-A9R7-01	Bladder Urothelial Carcinoma	I767M	OncoKB: Oncogenic, level_3b;CIViC: NA;MyCancerGenome: not present;CancerHotspot: yes;3DHotspot: no	MutationAssessor: impact: low, score: 0.95;SIFT: impact: deleterious, score: 0;Polyphen-2: impact: probably_damaging, score: 0.998	Missense_Mutation	SNP	diploid	5	.	.	.	17	37880257	37880257	C	G	17:g.37880257C>G	ENST00000269571.5:c.2301C>G	0.28		9	23		31	636	19/27
Bladder Urothelial Carcinoma (TCGA, PanCancer Atlas)	TCGA-ZF-AA4R-01	Bladder Urothelial Carcinoma	I767M	OncoKB: Oncogenic, level_3b;CIViC: NA;MyCancerGenome: not present;CancerHotspot: yes;3DHotspot: no	MutationAssessor: impact: low, score: 0.95;SIFT: impact: deleterious, score: 0;Polyphen-2: impact: probably_damaging, score: 0.998	Missense_Mutation	SNP	diploid	5	.	.	.	17	37880257	37880257	C	G	17:g.37880257C>G	ENST00000269571.5:c.2301C>G	0.37		7	12		29	62	19/27
Breast Invasive Carcinoma (TCGA, PanCancer Atlas)	TCGA-C8-A274-01	Breast Invasive Ductal Carcinoma	I767M	OncoKB: Oncogenic, level_3a;CIViC: NA;MyCancerGenome: not present;CancerHotspot: yes;3DHotspot: no	MutationAssessor: impact: low, score: 0.95;SIFT: impact: deleterious, score: 0;Polyphen-2: impact: probably_damaging, score: 0.998	Missense_Mutation	SNP	diploid	5	.	.	.	17	37880257	37880257	C	G	17:g.37880257C>G	ENST00000269571.5:c.2301C>G	0.33		24	49		67	188	19/27
Breast Invasive Carcinoma (TCGA, PanCancer Atlas)	TCGA-D8-A27G-01	Breast Invasive Lobular Carcinoma	I767M	OncoKB: Oncogenic, level_3a;CIViC: NA;MyCancerGenome: not present;CancerHotspot: yes;3DHotspot: no	MutationAssessor: impact: low, score: 0.95;SIFT: impact: deleterious, score: 0;Polyphen-2: impact: probably_damaging, score: 0.998	Missense_Mutation	SNP	amp	5	.	.	.	17	37880257	37880257	C	G	17:g.37880257C>G	ENST00000269571.5:c.2301C>G	0.06		6	89		64	813	19/27
Bladder Urothelial Carcinoma (TCGA, PanCancer Atlas)	TCGA-2F-A9KP-01	Bladder Urothelial Carcinoma	R678Q	OncoKB: Oncogenic, level_3b;CIViC: Predictive: 1;MyCancerGenome: not present;CancerHotspot: yes;3DHotspot: no	MutationAssessor: impact: medium, score: 2.07;SIFT: impact: tolerated, score: 0.19;Polyphen-2: impact: benign, score: 0.103	Missense_Mutation	SNP	amp	10	.	.	.	17	37879658	37879658	G	A	17:g.37879658G>A	ENST00000269571.5:c.2033G>A	1		1828	9		50	132	17/27		376344	rs1057519862
Bladder Urothelial Carcinoma (TCGA, PanCancer Atlas)	TCGA-CF-A5UA-01	Bladder Urothelial Carcinoma	R678Q	OncoKB: Oncogenic, level_3b;CIViC: Predictive: 1;MyCancerGenome: not present;CancerHotspot: yes;3DHotspot: no	MutationAssessor: impact: medium, score: 2.07;SIFT: impact: tolerated, score: 0.19;Polyphen-2: impact: benign, score: 0.103	Missense_Mutation	SNP	diploid	10	.	.	.	17	37879658	37879658	G	A	17:g.37879658G>A	ENST00000269571.5:c.2033G>A	0.42		55	77		179	66	17/27		376344	rs1057519862
Bladder Urothelial Carcinoma (TCGA, PanCancer Atlas)	TCGA-ZF-A9R3-01	Bladder Urothelial Carcinoma	R678Q	OncoKB: Oncogenic, level_3b;CIViC: Predictive: 1;MyCancerGenome: not present;CancerHotspot: yes;3DHotspot: no	MutationAssessor: impact: medium, score: 2.07;SIFT: impact: tolerated, score: 0.19;Polyphen-2: impact: benign, score: 0.103	Missense_Mutation	SNP	shallowdel	10	.	.	.	17	37879658	37879658	G	A	17:g.37879658G>A	ENST00000269571.5:c.2033G>A	0.06		3	45		47	80	17/27		376344	rs1057519862
Breast Invasive Carcinoma (TCGA, PanCancer Atlas)	TCGA-A2-A0T6-01	Breast Invasive Lobular Carcinoma	R678Q	OncoKB: Oncogenic, level_3a;CIViC: Predictive: 1;MyCancerGenome: not present;CancerHotspot: yes;3DHotspot: no	MutationAssessor: impact: medium, score: 2.07;SIFT: impact: tolerated, score: 0.19;Polyphen-2: impact: benign, score: 0.103	Missense_Mutation	SNP	diploid	10	.	.	.	17	37879658	37879658	G	A	17:g.37879658G>A	ENST00000269571.5:c.2033G>A	0.24		23	74		225	17	17/27		376344	rs1057519862
Colorectal Adenocarcinoma (TCGA, PanCancer Atlas)	TCGA-AA-3502-01	Colon Adenocarcinoma	R678Q	OncoKB: Oncogenic, level_3b;CIViC: Predictive: 1;MyCancerGenome: not present;CancerHotspot: yes;3DHotspot: no	MutationAssessor: impact: medium, score: 2.07;SIFT: impact: tolerated, score: 0.19;Polyphen-2: impact: benign, score: 0.103	Missense_Mutation	SNP	diploid	10	.	.	.	17	37879658	37879658	G	A	17:g.37879658G>A	ENST00000269571.5:c.2033G>A	0.44		34	43		153	167	17/27		376344	rs1057519862
Prostate Adenocarcinoma (TCGA, PanCancer Atlas)	TCGA-J4-8200-01	Prostate Adenocarcinoma	R678Q	OncoKB: Oncogenic, level_3b;CIViC: Predictive: 1;MyCancerGenome: not present;CancerHotspot: yes;3DHotspot: no	MutationAssessor: impact: medium, score: 2.07;SIFT: impact: tolerated, score: 0.19;Polyphen-2: impact: benign, score: 0.103	Missense_Mutation	SNP	diploid	10	.	.	.	17	37879658	37879658	G	A	17:g.37879658G>A	ENST00000269571.5:c.2033G>A	0.33		39	78		137	18	17/27		376344	rs1057519862
Stomach Adenocarcinoma (TCGA, PanCancer Atlas)	TCGA-BR-6802-01	Stomach Adenocarcinoma	R678Q	OncoKB: Oncogenic, level_3b;CIViC: Predictive: 1;MyCancerGenome: not present;CancerHotspot: yes;3DHotspot: no	MutationAssessor: impact: medium, score: 2.07;SIFT: impact: tolerated, score: 0.19;Polyphen-2: impact: benign, score: 0.103	Missense_Mutation	SNP	diploid	10	.	.	.	17	37879658	37879658	G	A	17:g.37879658G>A	ENST00000269571.5:c.2033G>A	0.12		12	88		118	426	17/27		376344	rs1057519862
Stomach Adenocarcinoma (TCGA, PanCancer Atlas)	TCGA-CG-4469-01	Intestinal Type Stomach Adenocarcinoma	R678Q	OncoKB: Oncogenic, level_3b;CIViC: Predictive: 1;MyCancerGenome: not present;CancerHotspot: yes;3DHotspot: no	MutationAssessor: impact: medium, score: 2.07;SIFT: impact: tolerated, score: 0.19;Polyphen-2: impact: benign, score: 0.103	Missense_Mutation	SNP	diploid	10	.	.	.	17	37879658	37879658	G	A	17:g.37879658G>A	ENST00000269571.5:c.2033G>A	0.37		61	106		138	280	17/27		376344	rs1057519862
Stomach Adenocarcinoma (TCGA, PanCancer Atlas)	TCGA-VQ-A8PD-01	Stomach Adenocarcinoma	R678Q	OncoKB: Oncogenic, level_3b;CIViC: Predictive: 1;MyCancerGenome: not present;CancerHotspot: yes;3DHotspot: no	MutationAssessor: impact: medium, score: 2.07;SIFT: impact: tolerated, score: 0.19;Polyphen-2: impact: benign, score: 0.103	Missense_Mutation	SNP	diploid	10	.	.	.	17	37879658	37879658	G	A	17:g.37879658G>A	ENST00000269571.5:c.2033G>A	0.23		13	43		59	76	17/27		376344	rs1057519862
Stomach Adenocarcinoma (TCGA, PanCancer Atlas)	TCGA-VQ-A8PZ-01	Signet Ring Cell Carcinoma of the Stomach	R678Q	OncoKB: Oncogenic, level_3b;CIViC: Predictive: 1;MyCancerGenome: not present;CancerHotspot: yes;3DHotspot: no	MutationAssessor: impact: medium, score: 2.07;SIFT: impact: tolerated, score: 0.19;Polyphen-2: impact: benign, score: 0.103	Missense_Mutation	SNP	gain	10	.	.	.	17	37879658	37879658	G	A	17:g.37879658G>A	ENST00000269571.5:c.2033G>A	0.24		12	37		69	74	17/27		376344	rs1057519862
Uterine Corpus Endometrial Carcinoma (TCGA, PanCancer Atlas)	TCGA-AP-A1DK-01	Uterine Endometrioid Carcinoma	R678Q	OncoKB: Oncogenic, level_3b;CIViC: Predictive: 1;MyCancerGenome: not present;CancerHotspot: yes;3DHotspot: no	MutationAssessor: impact: medium, score: 2.07;SIFT: impact: tolerated, score: 0.19;Polyphen-2: impact: benign, score: 0.103	Missense_Mutation	SNP	diploid	10	.	.	.	17	37879658	37879658	G	A	17:g.37879658G>A	ENST00000269571.5:c.2033G>A	0.25		18	54		49	10312	17/27		376344	rs1057519862
Uterine Corpus Endometrial Carcinoma (TCGA, PanCancer Atlas)	TCGA-B5-A11G-01	Uterine Endometrioid Carcinoma	R678Q	OncoKB: Oncogenic, level_3b;CIViC: Predictive: 1;MyCancerGenome: not present;CancerHotspot: yes;3DHotspot: no	MutationAssessor: impact: medium, score: 2.07;SIFT: impact: tolerated, score: 0.19;Polyphen-2: impact: benign, score: 0.103	Missense_Mutation	SNP	diploid	10	.	.	.	17	37879658	37879658	G	A	17:g.37879658G>A	ENST00000269571.5:c.2033G>A	0.42	0.0053	63	87	1	187	553	17/27		376344	rs1057519862
Uterine Corpus Endometrial Carcinoma (TCGA, PanCancer Atlas)	TCGA-BG-A222-01	Uterine Endometrioid Carcinoma	R678Q	OncoKB: Oncogenic, level_3b;CIViC: Predictive: 1;MyCancerGenome: not present;CancerHotspot: yes;3DHotspot: no	MutationAssessor: impact: medium, score: 2.07;SIFT: impact: tolerated, score: 0.19;Polyphen-2: impact: benign, score: 0.103	Missense_Mutation	SNP	diploid	10	.	.	.	17	37879658	37879658	G	A	17:g.37879658G>A	ENST00000269571.5:c.2033G>A	0.38		23	38		66	4274	17/27		376344	rs1057519862
Uterine Corpus Endometrial Carcinoma (TCGA, PanCancer Atlas)	TCGA-EC-A1QX-01	Uterine Endometrioid Carcinoma	R678Q	OncoKB: Oncogenic, level_3b;CIViC: Predictive: 1;MyCancerGenome: not present;CancerHotspot: yes;3DHotspot: no	MutationAssessor: impact: medium, score: 2.07;SIFT: impact: tolerated, score: 0.19;Polyphen-2: impact: benign, score: 0.103	Missense_Mutation	SNP	diploid	10	.	.	.	17	37879658	37879658	G	A	17:g.37879658G>A	ENST00000269571.5:c.2033G>A	0.19		14	60		57	645	17/27		376344	rs1057519862
Uterine Corpus Endometrial Carcinoma (TCGA, PanCancer Atlas)	TCGA-EC-A24G-01	Uterine Endometrioid Carcinoma	R678Q	OncoKB: Oncogenic, level_3b;CIViC: Predictive: 1;MyCancerGenome: not present;CancerHotspot: yes;3DHotspot: no	MutationAssessor: impact: medium, score: 2.07;SIFT: impact: tolerated, score: 0.19;Polyphen-2: impact: benign, score: 0.103	Missense_Mutation	SNP	diploid	10	.	.	.	17	37879658	37879658	G	A	17:g.37879658G>A	ENST00000269571.5:c.2033G>A	0.31		25	55		99	1019	17/27		376344	rs1057519862
Breast Invasive Carcinoma (TCGA, PanCancer Atlas)	TCGA-A8-A06Z-01	Breast Invasive Ductal Carcinoma	G309A	OncoKB: Oncogenic, level_3a;CIViC: Predictive: 1;MyCancerGenome: present;CancerHotspot: no;3DHotspot: no	MutationAssessor: impact: medium, score: 2.715;SIFT: impact: deleterious, score: 0.02;Polyphen-2: impact: probably_damaging, score: 0.997	Missense_Mutation	SNP	gain	2	.	.	.	17	37868205	37868205	G	C	17:g.37868205G>C	ENST00000269571.5:c.926G>C	0.13		11	77		132	70	2020-08-27		376205	rs1057519787
Bladder Urothelial Carcinoma (TCGA, PanCancer Atlas)	TCGA-FD-A5BU-01	Bladder Urothelial Carcinoma	V842I	OncoKB: Oncogenic, level_3b;CIViC: Predictive: 3;MyCancerGenome: present;CancerHotspot: yes;3DHotspot: no	MutationAssessor: impact: neutral, score: 0.39;SIFT: impact: deleterious, score: 0;Polyphen-2: impact: possibly_damaging, score: 0.906	Missense_Mutation	SNP	diploid	12	.	.	.	17	37881332	37881332	G	A	17:g.37881332G>A	ENST00000269571.5:c.2524G>A	0.12		9	64		77	70	21/27	3.9775e-06	375994	rs1057519738
Bladder Urothelial Carcinoma (TCGA, PanCancer Atlas)	TCGA-HQ-A2OF-01	Bladder Urothelial Carcinoma	V842I	OncoKB: Oncogenic, level_3b;CIViC: Predictive: 3;MyCancerGenome: present;CancerHotspot: yes;3DHotspot: no	MutationAssessor: impact: neutral, score: 0.39;SIFT: impact: deleterious, score: 0;Polyphen-2: impact: possibly_damaging, score: 0.906	Missense_Mutation	SNP	amp	12	.	.	.	17	37881332	37881332	G	A	17:g.37881332G>A	ENST00000269571.5:c.2524G>A	0.85		284	51		56	96	21/27	3.9775e-06	375994	rs1057519738
Breast Invasive Carcinoma (TCGA, PanCancer Atlas)	TCGA-A8-A08Z-01	Breast Invasive Ductal Carcinoma	V842I	OncoKB: Oncogenic, level_3a;CIViC: Predictive: 3;MyCancerGenome: present;CancerHotspot: yes;3DHotspot: no	MutationAssessor: impact: neutral, score: 0.39;SIFT: impact: deleterious, score: 0;Polyphen-2: impact: possibly_damaging, score: 0.906	Missense_Mutation	SNP	diploid	12	.	.	.	17	37881332	37881332	G	A	17:g.37881332G>A	ENST00000269571.5:c.2524G>A	0.42		13	18		73	29	21/27	3.9775e-06	375994	rs1057519738
Colorectal Adenocarcinoma (TCGA, PanCancer Atlas)	TCGA-AG-3898-01	Rectal Adenocarcinoma	V842I	OncoKB: Oncogenic, level_3b;CIViC: Predictive: 3;MyCancerGenome: present;CancerHotspot: yes;3DHotspot: no	MutationAssessor: impact: neutral, score: 0.39;SIFT: impact: deleterious, score: 0;Polyphen-2: impact: possibly_damaging, score: 0.906	Missense_Mutation	SNP	amp	12	.	.	.	17	37881332	37881332	G	A	17:g.37881332G>A	ENST00000269571.5:c.2524G>A	0.96		1158	48		33	99	21/27	3.9775e-06	375994	rs1057519738
Colorectal Adenocarcinoma (TCGA, PanCancer Atlas)	TCGA-AG-3902-01	Rectal Adenocarcinoma	V842I	OncoKB: Oncogenic, level_3b;CIViC: Predictive: 3;MyCancerGenome: present;CancerHotspot: yes;3DHotspot: no	MutationAssessor: impact: neutral, score: 0.39;SIFT: impact: deleterious, score: 0;Polyphen-2: impact: possibly_damaging, score: 0.906	Missense_Mutation	SNP	gain	12	.	.	.	17	37881332	37881332	G	A	17:g.37881332G>A	ENST00000269571.5:c.2524G>A	0.4		31	47		33	119	21/27	3.9775e-06	375994	rs1057519738
Colorectal Adenocarcinoma (TCGA, PanCancer Atlas)	TCGA-AA-3994-01	Mucinous Adenocarcinoma of the Colon and Rectum	V842I	OncoKB: Oncogenic, level_3b;CIViC: Predictive: 3;MyCancerGenome: present;CancerHotspot: yes;3DHotspot: no	MutationAssessor: impact: neutral, score: 0.39;SIFT: impact: deleterious, score: 0;Polyphen-2: impact: possibly_damaging, score: 0.906	Missense_Mutation	SNP	amp	12	.	.	.	17	37881332	37881332	G	A	17:g.37881332G>A	ENST00000269571.5:c.2524G>A	0.74	0.02	403	140	1	57	178	21/27	3.9775e-06	375994	rs1057519738
Pancreatic Adenocarcinoma (TCGA, PanCancer Atlas)	TCGA-IB-7651-01	Pancreatic Adenocarcinoma	V842I	OncoKB: Oncogenic, level_3b;CIViC: Predictive: 3;MyCancerGenome: present;CancerHotspot: yes;3DHotspot: no	MutationAssessor: impact: neutral, score: 0.39;SIFT: impact: deleterious, score: 0;Polyphen-2: impact: possibly_damaging, score: 0.906	Missense_Mutation	SNP	diploid	12	.	.	.	17	37881332	37881332	G	A	17:g.37881332G>A	ENST00000269571.5:c.2524G>A	0.19		51	222		49	14306	21/27	3.9775e-06	375994	rs1057519738
Pancreatic Adenocarcinoma (TCGA, PanCancer Atlas)	TCGA-IB-8127-01	Pancreatic Adenocarcinoma	V842I	OncoKB: Oncogenic, level_3b;CIViC: Predictive: 3;MyCancerGenome: present;CancerHotspot: yes;3DHotspot: no	MutationAssessor: impact: neutral, score: 0.39;SIFT: impact: deleterious, score: 0;Polyphen-2: impact: possibly_damaging, score: 0.906	Missense_Mutation	SNP	diploid	12	.	.	.	17	37881332	37881332	G	A	17:g.37881332G>A	ENST00000269571.5:c.2524G>A	0.19		84	363		63	28	21/27	3.9775e-06	375994	rs1057519738
Stomach Adenocarcinoma (TCGA, PanCancer Atlas)	TCGA-HU-A4H8-01	Tubular Stomach Adenocarcinoma	V842I	OncoKB: Oncogenic, level_3b;CIViC: Predictive: 3;MyCancerGenome: present;CancerHotspot: yes;3DHotspot: no	MutationAssessor: impact: neutral, score: 0.39;SIFT: impact: deleterious, score: 0;Polyphen-2: impact: possibly_damaging, score: 0.906	Missense_Mutation	SNP	diploid	12	.	.	.	17	37881332	37881332	G	A	17:g.37881332G>A	ENST00000269571.5:c.2524G>A	0.33		20	41		96	1061	21/27	3.9775e-06	375994	rs1057519738
Uterine Corpus Endometrial Carcinoma (TCGA, PanCancer Atlas)	TCGA-AX-A1C9-01	Uterine Endometrioid Carcinoma	V842I	OncoKB: Oncogenic, level_3b;CIViC: Predictive: 3;MyCancerGenome: present;CancerHotspot: yes;3DHotspot: no	MutationAssessor: impact: neutral, score: 0.39;SIFT: impact: deleterious, score: 0;Polyphen-2: impact: possibly_damaging, score: 0.906	Missense_Mutation	SNP	diploid	12	.	.	.	17	37881332	37881332	G	A	17:g.37881332G>A	ENST00000269571.5:c.2524G>A	0.33		7	14		15	965	21/27	3.9775e-06	375994	rs1057519738
Uterine Corpus Endometrial Carcinoma (TCGA, PanCancer Atlas)	TCGA-AX-A3FT-01	Uterine Endometrioid Carcinoma	V842I	OncoKB: Oncogenic, level_3b;CIViC: Predictive: 3;MyCancerGenome: present;CancerHotspot: yes;3DHotspot: no	MutationAssessor: impact: neutral, score: 0.39;SIFT: impact: deleterious, score: 0;Polyphen-2: impact: possibly_damaging, score: 0.906	Missense_Mutation	SNP	diploid	12	.	.	.	17	37881332	37881332	G	A	17:g.37881332G>A	ENST00000269571.5:c.2524G>A	0.36		8	14		31	1281	21/27	3.9775e-06	375994	rs1057519738
Uterine Corpus Endometrial Carcinoma (TCGA, PanCancer Atlas)	TCGA-B5-A1MS-01	Uterine Serous Carcinoma/Uterine Papillary Serous Carcinoma	V842I	OncoKB: Oncogenic, level_3b;CIViC: Predictive: 3;MyCancerGenome: present;CancerHotspot: yes;3DHotspot: no	MutationAssessor: impact: neutral, score: 0.39;SIFT: impact: deleterious, score: 0;Polyphen-2: impact: possibly_damaging, score: 0.906	Missense_Mutation	SNP	shallowdel	12	.	.	.	17	37881332	37881332	G	A	17:g.37881332G>A	ENST00000269571.5:c.2524G>A	0.39		12	19		50	45	21/27	3.9775e-06	375994	rs1057519738
Uterine Corpus Endometrial Carcinoma (TCGA, PanCancer Atlas)	TCGA-D1-A161-01	Uterine Endometrioid Carcinoma	V842I	OncoKB: Oncogenic, level_3b;CIViC: Predictive: 3;MyCancerGenome: present;CancerHotspot: yes;3DHotspot: no	MutationAssessor: impact: neutral, score: 0.39;SIFT: impact: deleterious, score: 0;Polyphen-2: impact: possibly_damaging, score: 0.906	Missense_Mutation	SNP	diploid	12	.	.	.	17	37881332	37881332	G	A	17:g.37881332G>A	ENST00000269571.5:c.2524G>A	0.6		44	29		78	79	21/27	3.9775e-06	375994	rs1057519738
Uterine Carcinosarcoma (TCGA, PanCancer Atlas)	TCGA-N5-A4RJ-01	Uterine Carcinosarcoma/Uterine Malignant Mixed Mullerian Tumor	V842I	OncoKB: Oncogenic, level_3b;CIViC: Predictive: 3;MyCancerGenome: present;CancerHotspot: yes;3DHotspot: no	MutationAssessor: impact: neutral, score: 0.39;SIFT: impact: deleterious, score: 0;Polyphen-2: impact: possibly_damaging, score: 0.906	Missense_Mutation	SNP	gain	12	.	.	.	17	37881332	37881332	G	A	17:g.37881332G>A	ENST00000269571.5:c.2524G>A	0.42		44	60		83	51	21/27	3.9775e-06	375994	rs1057519738
Bladder Urothelial Carcinoma (TCGA, PanCancer Atlas)	TCGA-CU-A3YL-01	Bladder Urothelial Carcinoma	L755S	OncoKB: Oncogenic, level_3b;CIViC: Predictive: 7, Prognostic: 1;MyCancerGenome: present;CancerHotspot: yes;3DHotspot: no	MutationAssessor: impact: medium, score: 3.025;SIFT: impact: deleterious, score: 0;Polyphen-2: impact: probably_damaging, score: 1	Missense_Mutation	SNP	gain	35	.	.	.	17	37880220	37880220	T	C	17:g.37880220T>C	ENST00000269571.5:c.2264T>C	0.39		15	23		66	212	19/27
Breast Invasive Carcinoma (TCGA, PanCancer Atlas)	TCGA-A8-A0A6-01	Breast Invasive Lobular Carcinoma	L755S	OncoKB: Oncogenic, level_3a;CIViC: Predictive: 7, Prognostic: 1;MyCancerGenome: present;CancerHotspot: yes;3DHotspot: no	MutationAssessor: impact: medium, score: 3.025;SIFT: impact: deleterious, score: 0;Polyphen-2: impact: probably_damaging, score: 1	Missense_Mutation	SNP	gain	35	.	.	.	17	37880220	37880220	T	C	17:g.37880220T>C	ENST00000269571.5:c.2264T>C	0.42		18	25		37	25	19/27
Breast Invasive Carcinoma (TCGA, PanCancer Atlas)	TCGA-A8-A0AB-01	Breast Invasive Lobular Carcinoma	L755S	OncoKB: Oncogenic, level_3a;CIViC: Predictive: 7, Prognostic: 1;MyCancerGenome: present;CancerHotspot: yes;3DHotspot: no	MutationAssessor: impact: medium, score: 3.025;SIFT: impact: deleterious, score: 0;Polyphen-2: impact: probably_damaging, score: 1	Missense_Mutation	SNP	gain	35	.	.	.	17	37880220	37880220	T	C	17:g.37880220T>C	ENST00000269571.5:c.2264T>C	0.5		94	93		91	30	19/27
Breast Invasive Carcinoma (TCGA, PanCancer Atlas)	TCGA-AC-A3YI-01	Breast Invasive Lobular Carcinoma	L755S	OncoKB: Oncogenic, level_3a;CIViC: Predictive: 7, Prognostic: 1;MyCancerGenome: present;CancerHotspot: yes;3DHotspot: no	MutationAssessor: impact: medium, score: 3.025;SIFT: impact: deleterious, score: 0;Polyphen-2: impact: probably_damaging, score: 1	Missense_Mutation	SNP	diploid	35	.	.	.	17	37880220	37880220	T	C	17:g.37880220T>C	ENST00000269571.5:c.2264T>C	0.11		5	39		24	14	19/27
Breast Invasive Carcinoma (TCGA, PanCancer Atlas)	TCGA-BH-A18P-01	Breast Invasive Ductal Carcinoma	L755S	OncoKB: Oncogenic, level_3a;CIViC: Predictive: 7, Prognostic: 1;MyCancerGenome: present;CancerHotspot: yes;3DHotspot: no	MutationAssessor: impact: medium, score: 3.025;SIFT: impact: deleterious, score: 0;Polyphen-2: impact: probably_damaging, score: 1	Missense_Mutation	SNP	gain	35	.	.	.	17	37880220	37880220	T	C	17:g.37880220T>C	ENST00000269571.5:c.2264T>C	0.68		229	107		277	275	19/27
Breast Invasive Carcinoma (TCGA, PanCancer Atlas)	TCGA-D8-A1XM-01	Breast Invasive Ductal Carcinoma	L755S	OncoKB: Oncogenic, level_3a;CIViC: Predictive: 7, Prognostic: 1;MyCancerGenome: present;CancerHotspot: yes;3DHotspot: no	MutationAssessor: impact: medium, score: 3.025;SIFT: impact: deleterious, score: 0;Polyphen-2: impact: probably_damaging, score: 1	Missense_Mutation	SNP	gain	35	.	.	.	17	37880220	37880220	T	C	17:g.37880220T>C	ENST00000269571.5:c.2264T>C	0.34		40	78		69	44	19/27
Cholangiocarcinoma (TCGA, PanCancer Atlas)	TCGA-4G-AAZO-01	Intrahepatic Cholangiocarcinoma	L755S	OncoKB: Oncogenic, level_3b;CIViC: Predictive: 7, Prognostic: 1;MyCancerGenome: present;CancerHotspot: yes;3DHotspot: no	MutationAssessor: impact: medium, score: 3.025;SIFT: impact: deleterious, score: 0;Polyphen-2: impact: probably_damaging, score: 1	Missense_Mutation	SNP	shallowdel	35	.	.	.	17	37880220	37880220	T	C	17:g.37880220T>C	ENST00000269571.5:c.2264T>C	0.43		9	12		24	40	19/27
Kidney Renal Papillary Cell Carcinoma (TCGA, PanCancer Atlas)	TCGA-DW-7839-01	Papillary Renal Cell Carcinoma	L755S	OncoKB: Oncogenic, level_3b;CIViC: Predictive: 7, Prognostic: 1;MyCancerGenome: present;CancerHotspot: yes;3DHotspot: no	MutationAssessor: impact: medium, score: 3.025;SIFT: impact: deleterious, score: 0;Polyphen-2: impact: probably_damaging, score: 1	Missense_Mutation	SNP	gain	35	.	.	.	17	37880220	37880220	T	C	17:g.37880220T>C	ENST00000269571.5:c.2264T>C	0.63		40	23		82	42	19/27
Kidney Renal Papillary Cell Carcinoma (TCGA, PanCancer Atlas)	TCGA-Y8-A894-01	Papillary Renal Cell Carcinoma	L755S	OncoKB: Oncogenic, level_3b;CIViC: Predictive: 7, Prognostic: 1;MyCancerGenome: present;CancerHotspot: yes;3DHotspot: no	MutationAssessor: impact: medium, score: 3.025;SIFT: impact: deleterious, score: 0;Polyphen-2: impact: probably_damaging, score: 1	Missense_Mutation	SNP	diploid	35	.	.	.	17	37880220	37880220	T	C	17:g.37880220T>C	ENST00000269571.5:c.2264T>C	0.44		24	31		49	73	19/27
Stomach Adenocarcinoma (TCGA, PanCancer Atlas)	TCGA-VQ-A8PB-01	Papillary Stomach Adenocarcinoma	L755S	OncoKB: Oncogenic, level_3b;CIViC: Predictive: 7, Prognostic: 1;MyCancerGenome: present;CancerHotspot: yes;3DHotspot: no	MutationAssessor: impact: medium, score: 3.025;SIFT: impact: deleterious, score: 0;Polyphen-2: impact: probably_damaging, score: 1	Missense_Mutation	SNP	diploid	35	.	.	.	17	37880220	37880220	T	C	17:g.37880220T>C	ENST00000269571.5:c.2264T>C	0.15		5	29		45	740	19/27
Uterine Corpus Endometrial Carcinoma (TCGA, PanCancer Atlas)	TCGA-A5-A0G1-01	Uterine Serous Carcinoma/Uterine Papillary Serous Carcinoma	L755S	OncoKB: Oncogenic, level_3b;CIViC: Predictive: 7, Prognostic: 1;MyCancerGenome: present;CancerHotspot: yes;3DHotspot: no	MutationAssessor: impact: medium, score: 3.025;SIFT: impact: deleterious, score: 0;Polyphen-2: impact: probably_damaging, score: 1	Missense_Mutation	SNP	diploid	35	.	.	.	17	37880220	37880220	T	C	17:g.37880220T>C	ENST00000269571.5:c.2264T>C	0.18		64	285		307	10820	19/27
Uterine Corpus Endometrial Carcinoma (TCGA, PanCancer Atlas)	TCGA-AX-A1C9-01	Uterine Endometrioid Carcinoma	L755S	OncoKB: Oncogenic, level_3b;CIViC: Predictive: 7, Prognostic: 1;MyCancerGenome: present;CancerHotspot: yes;3DHotspot: no	MutationAssessor: impact: medium, score: 3.025;SIFT: impact: deleterious, score: 0;Polyphen-2: impact: probably_damaging, score: 1	Missense_Mutation	SNP	diploid	35	.	.	.	17	37880220	37880220	T	C	17:g.37880220T>C	ENST00000269571.5:c.2264T>C	0.43		15	20		24	965	19/27
Uterine Corpus Endometrial Carcinoma (TCGA, PanCancer Atlas)	TCGA-D1-A167-01	Uterine Endometrioid Carcinoma	L755S	OncoKB: Oncogenic, level_3b;CIViC: Predictive: 7, Prognostic: 1;MyCancerGenome: present;CancerHotspot: yes;3DHotspot: no	MutationAssessor: impact: medium, score: 3.025;SIFT: impact: deleterious, score: 0;Polyphen-2: impact: probably_damaging, score: 1	Missense_Mutation	SNP	diploid	35	.	.	.	17	37880220	37880220	T	C	17:g.37880220T>C	ENST00000269571.5:c.2264T>C	0.44		102	131		273	1555	19/27
Breast Invasive Carcinoma (TCGA, PanCancer Atlas)	TCGA-BH-A0C1-01	Breast Invasive Lobular Carcinoma	V777L	OncoKB: Oncogenic, level_3a;CIViC: Predictive: 4;MyCancerGenome: present;CancerHotspot: yes;3DHotspot: no	MutationAssessor: impact: neutral, score: -1.95;SIFT: impact: deleterious, score: 0.05;Polyphen-2: impact: benign, score: 0.036	Missense_Mutation	SNP	diploid	12	.	.	.	17	37881000	37881000	G	C	17:g.37881000G>C	ENST00000269571.5:c.2329G>C	0.38		42	70		114	32	20/27		376036	rs121913471
Bladder Urothelial Carcinoma (TCGA, PanCancer Atlas)	TCGA-MV-A51V-01	Bladder Urothelial Carcinoma	D769Y	OncoKB: Oncogenic, level_3b;CIViC: Predictive: 1;MyCancerGenome: present;CancerHotspot: yes;3DHotspot: no	MutationAssessor: impact: low, score: 1.095;SIFT: impact: deleterious, score: 0;Polyphen-2: impact: probably_damaging, score: 1	Missense_Mutation	SNP	gain	9	.	.	.	17	37880261	37880261	G	T	17:g.37880261G>T	ENST00000269571.5:c.2305G>T	0.45		28	34		15	1421	19/27		375992	rs121913468
Breast Invasive Carcinoma (TCGA, PanCancer Atlas)	TCGA-BH-A1FE-01	Breast Invasive Ductal Carcinoma	D769Y	OncoKB: Oncogenic, level_3a;CIViC: Predictive: 1;MyCancerGenome: present;CancerHotspot: yes;3DHotspot: no	MutationAssessor: impact: low, score: 1.095;SIFT: impact: deleterious, score: 0;Polyphen-2: impact: probably_damaging, score: 1	Missense_Mutation	SNP	diploid	9	.	.	.	17	37880261	37880261	G	T	17:g.37880261G>T	ENST00000269571.5:c.2305G>T	0.14		14	88		37	19	19/27		375992	rs121913468
Breast Invasive Carcinoma (TCGA, PanCancer Atlas)	TCGA-E9-A1R5-01	Breast Invasive Ductal Carcinoma	D769Y	OncoKB: Oncogenic, level_3a;CIViC: Predictive: 1;MyCancerGenome: present;CancerHotspot: yes;3DHotspot: no	MutationAssessor: impact: low, score: 1.095;SIFT: impact: deleterious, score: 0;Polyphen-2: impact: probably_damaging, score: 1	Missense_Mutation	SNP	gain	9	.	.	.	17	37880261	37880261	G	T	17:g.37880261G>T	ENST00000269571.5:c.2305G>T	0.5	0.0069	67	67	1	144	42	19/27		375992	rs121913468
Stomach Adenocarcinoma (TCGA, PanCancer Atlas)	TCGA-HU-A4H0-01	Diffuse Type Stomach Adenocarcinoma	D769Y	OncoKB: Oncogenic, level_3b;CIViC: Predictive: 1;MyCancerGenome: present;CancerHotspot: yes;3DHotspot: no	MutationAssessor: impact: low, score: 1.095;SIFT: impact: deleterious, score: 0;Polyphen-2: impact: probably_damaging, score: 1	Missense_Mutation	SNP	gain	9	.	.	.	17	37880261	37880261	G	T	17:g.37880261G>T	ENST00000269571.5:c.2305G>T	0.54		15	13		14	159	19/27		375992	rs121913468
Bladder Urothelial Carcinoma (TCGA, PanCancer Atlas)	TCGA-XF-A9SI-01	Bladder Urothelial Carcinoma	D769H	OncoKB: Oncogenic, level_3b;CIViC: Predictive: 1;MyCancerGenome: present;CancerHotspot: yes;3DHotspot: no	MutationAssessor: impact: neutral, score: 0.365;SIFT: impact: deleterious, score: 0;Polyphen-2: impact: probably_damaging, score: 1	Missense_Mutation	SNP	diploid	9	.	.	.	17	37880261	37880261	G	C	17:g.37880261G>C	ENST00000269571.5:c.2305G>C	0.1		3	27		31	320	19/27		375991	rs121913468
Breast Invasive Carcinoma (TCGA, PanCancer Atlas)	TCGA-C8-A135-01	Breast Invasive Ductal Carcinoma	D769H	OncoKB: Oncogenic, level_3a;CIViC: Predictive: 1;MyCancerGenome: present;CancerHotspot: yes;3DHotspot: no	MutationAssessor: impact: neutral, score: 0.365;SIFT: impact: deleterious, score: 0;Polyphen-2: impact: probably_damaging, score: 1	Missense_Mutation	SNP	amp	9	.	.	.	17	37880261	37880261	G	C	17:g.37880261G>C	ENST00000269571.5:c.2305G>C	0.53		246	215		205	56	19/27		375991	rs121913468
Cervical Squamous Cell Carcinoma (TCGA, PanCancer Atlas)	TCGA-FU-A40J-01	Endocervical Adenocarcinoma	D769H	OncoKB: Oncogenic, level_3b;CIViC: Predictive: 1;MyCancerGenome: present;CancerHotspot: yes;3DHotspot: no	MutationAssessor: impact: neutral, score: 0.365;SIFT: impact: deleterious, score: 0;Polyphen-2: impact: probably_damaging, score: 1	Missense_Mutation	SNP	gain	9	.	.	.	17	37880261	37880261	G	C	17:g.37880261G>C	ENST00000269571.5:c.2305G>C	0.24		4	13		23	192	19/27		375991	rs121913468
Breast Invasive Carcinoma (TCGA, PanCancer Atlas)	TCGA-A2-A0T6-01	Breast Invasive Lobular Carcinoma	L755M	OncoKB: Likely Neutral, level NA;CIViC: NA;MyCancerGenome: present;CancerHotspot: yes;3DHotspot: no	MutationAssessor: impact: medium, score: 2.405;SIFT: impact: deleterious, score: 0;Polyphen-2: impact: probably_damaging, score: 1	Missense_Mutation	SNP	diploid	35	.	.	.	17	37880219	37880219	T	A	17:g.37880219T>A	ENST00000269571.5:c.2263T>A	0.28		42	109		178	17	19/27		376404	rs1057519890
Skin Cutaneous Melanoma (TCGA, PanCancer Atlas)	TCGA-EE-A20C-06	Cutaneous Melanoma	L755M	OncoKB: Likely Neutral, level NA;CIViC: NA;MyCancerGenome: present;CancerHotspot: yes;3DHotspot: no	MutationAssessor: impact: medium, score: 2.405;SIFT: impact: deleterious, score: 0;Polyphen-2: impact: probably_damaging, score: 1	Missense_Mutation	SNP	diploid	35	.	.	.	17	37880219	37880219	T	A	17:g.37880219T>A	ENST00000269571.5:c.2263T>A	0.45		22	27		47	2073	19/27		376404	rs1057519890
Bladder Urothelial Carcinoma (TCGA, PanCancer Atlas)	TCGA-GV-A6ZA-01	Bladder Urothelial Carcinoma	V777L	OncoKB: Oncogenic, level_3b;CIViC: Predictive: 4;MyCancerGenome: present;CancerHotspot: yes;3DHotspot: no	MutationAssessor: impact: neutral, score: -1.95;SIFT: impact: deleterious, score: 0.05;Polyphen-2: impact: benign, score: 0.036	Missense_Mutation	SNP	diploid	12	.	.	.	17	37881000	37881000	G	T	17:g.37881000G>T	ENST00000269571.5:c.2329G>T	0.85		34	6		49	293	20/27		44991	rs121913471
Bladder Urothelial Carcinoma (TCGA, PanCancer Atlas)	TCGA-KQ-A41S-01	Bladder Urothelial Carcinoma	V777L	OncoKB: Oncogenic, level_3b;CIViC: Predictive: 4;MyCancerGenome: present;CancerHotspot: yes;3DHotspot: no	MutationAssessor: impact: neutral, score: -1.95;SIFT: impact: deleterious, score: 0.05;Polyphen-2: impact: benign, score: 0.036	Missense_Mutation	SNP	gain	12	.	.	.	17	37881000	37881000	G	T	17:g.37881000G>T	ENST00000269571.5:c.2329G>T	0.29		27	67		62	238	20/27		44991	rs121913471
Breast Invasive Carcinoma (TCGA, PanCancer Atlas)	TCGA-4H-AAAK-01	Breast Invasive Lobular Carcinoma	V777L	OncoKB: Oncogenic, level_3a;CIViC: Predictive: 4;MyCancerGenome: present;CancerHotspot: yes;3DHotspot: no	MutationAssessor: impact: neutral, score: -1.95;SIFT: impact: deleterious, score: 0.05;Polyphen-2: impact: benign, score: 0.036	Missense_Mutation	SNP	gain	12	.	.	.	17	37881000	37881000	G	T	17:g.37881000G>T	ENST00000269571.5:c.2329G>T	0.36		13	23		58	21	20/27		44991	rs121913471
Breast Invasive Carcinoma (TCGA, PanCancer Atlas)	TCGA-OL-A5D6-01	Breast Invasive Ductal Carcinoma	V777L	OncoKB: Oncogenic, level_3a;CIViC: Predictive: 4;MyCancerGenome: present;CancerHotspot: yes;3DHotspot: no	MutationAssessor: impact: neutral, score: -1.95;SIFT: impact: deleterious, score: 0.05;Polyphen-2: impact: benign, score: 0.036	Missense_Mutation	SNP	diploid	12	.	.	.	17	37881000	37881000	G	T	17:g.37881000G>T	ENST00000269571.5:c.2329G>T	0.57		33	25		64	34	20/27		44991	rs121913471
[truncated: 203 more rows]

## Sheet: ERBB2 fusions only
Study	Sample ID	Cancer Type	Protein Change	Copy #	# Mut in Sample	Class
Breast Invasive Carcinoma (TCGA, PanCancer Atlas)	TCGA-D8-A1X5-01	Breast Invasive Ductal Carcinoma	ADGRA3-ERBB2	amp	47	1
Breast Invasive Carcinoma (TCGA, PanCancer Atlas)	TCGA-A8-A08X-01	Breast Invasive Ductal Carcinoma	AP2B1-ERBB2	amp	33	1
[truncated: 209 more rows]

## Sheet: ERBB2 coalterations
Gene	MutSig(Q-value)	# Mut	#	Profiled Samples	Freq	Is Cancer Gene (source: OncoKB)				Gene	Freq
[truncated: 4,510 more rows]

## Sheet: ERBB4 mutations
Study	Sample ID	Cancer Type	Protein Change	Annotation	Functional Impact	Mutation Type	Variant Type	Copy #	COSMIC	MS	VS	Center	Chromosome	Start Pos	End Pos	Ref	Var	HGVSg	HGVSc	Allele Freq (T)	Allele Freq (N)	Variant Reads	Ref Reads	Variant Reads (Normal)	Ref Reads (Normal)	# Mut in Sample	Exon	gnomAD	ClinVar ID	dbSNP
[truncated: 561 more rows]

[truncated: 2 more sheets: ERBB4-fusions only, ERBB4 coalterations]
